# Supplementary material for: A Fusion Protein Complex that Combines IL-12, IL-15, and IL-18 Signaling to Induce Memory-Like NK Cells for Cancer Immunotherapy
Source: Oxford University Press journal article supplement (doi:10.1158/2326-6066.cir-20-1002), 2021-07-09
Supplement: 23266066cir201002-sup-256646_3_supp_7124634_qvl67p.xlsx [file 23266066cir201002-sup-256646_3_supp_7124634_qvl67p.xlsx]

## Sheet: Baseline to Stim
Description	Ensemble Gene ID	Entrezgene	External Gene Source	Gene Name	Gene Biotype	Transcript Count	Mean	logFC	Average Expression	t	P. Value	Adj. P. Value	B
C-X-C motif chemokine ligand 10 [Source:HGNC Symbol;Acc:HGNC:10637]	ENSG00000169245	3627	HGNC Symbol	CXCL10	protein_coding	1	4.6304	8.2086	5.4424	13.278	5.4356e-10	6.5157e-06	13.025
histone cluster 1 H1 family member c [Source:HGNC Symbol;Acc:HGNC:4716]	ENSG00000187837	3006	HGNC Symbol	HIST1H1C	protein_coding	1	4.6654	-3.9584	4.8245	-12.608	1.1533e-09	6.9125e-06	12.345
mediator complex subunit 11 [Source:HGNC Symbol;Acc:HGNC:32687]	ENSG00000161920	400569	HGNC Symbol	MED11	protein_coding	3	5.8027	2.8901	5.7808	12.117	2.0464e-09	7.0766e-06	11.821
histone cluster 2 H2B family member e [Source:HGNC Symbol;Acc:HGNC:4760]	ENSG00000184678	8349	HGNC Symbol	HIST2H2BE	protein_coding	1	2.1203	-2.9726	2.6928	-11.971	2.4344e-09	7.0766e-06	11.662
ras homolog family member B [Source:HGNC Symbol;Acc:HGNC:668]	ENSG00000143878	388	HGNC Symbol	RHOB	protein_coding	1	1.5131	-2.9968	2.1396	-11.811	2.9518e-09	7.0766e-06	11.484
solute carrier family 1 member 5 [Source:HGNC Symbol;Acc:HGNC:10943]	ENSG00000105281	6510	HGNC Symbol	SLC1A5	protein_coding	6	5.5797	4.6955	5.5614	11.036	7.7352e-09	8.308e-06	10.589
ribonuclease P/MRP subunit p40 [Source:HGNC Symbol;Acc:HGNC:20992]	ENSG00000124787	10799	HGNC Symbol	RPP40	protein_coding	7	3.633	3.6558	3.4788	11.029	7.8019e-09	8.308e-06	10.581
centrin 3 [Source:HGNC Symbol;Acc:HGNC:1868]	ENSG00000153140	1070	HGNC Symbol	CETN3	protein_coding	6	3.9325	2.7334	3.6975	11.042	7.6792e-09	8.308e-06	10.595
Pim-1 proto-oncogene, serine/threonine kinase [Source:HGNC Symbol;Acc:HGNC:8986]	ENSG00000137193	5292	HGNC Symbol	PIM1	protein_coding	3	7.2138	2.6392	7.4188	11.335	5.3004e-09	8.308e-06	10.941
mitochondrial ribosomal protein S6 [Source:HGNC Symbol;Acc:HGNC:14051]	ENSG00000243927	64968	HGNC Symbol	MRPS6	protein_coding	5	6.2931	2.2372	6.208	10.979	8.3237e-09	8.308e-06	10.52
inositol 1,4,5-trisphosphate receptor interacting protein [Source:HGNC Symbol;Acc:HGNC:29370]	ENSG00000148841	85450	HGNC Symbol	ITPRIP	protein_coding	5	4.7922	-2.3482	4.8507	-10.917	9.0101e-09	8.308e-06	10.446
DNA damage inducible transcript 3 [Source:HGNC Symbol;Acc:HGNC:2726]	ENSG00000175197	1649	HGNC Symbol	DDIT3	protein_coding	6	6.7088	-3.153	6.3364	-11.007	8.0255e-09	8.308e-06	10.554
histone cluster 1 H2A family member e [Source:HGNC Symbol;Acc:HGNC:4724]	ENSG00000277075	3012	HGNC Symbol	HIST1H2AE	protein_coding	1	1.6505	-4.6625	1.4257	-11.475	4.4513e-09	8.308e-06	11.104
transmembrane protein 250 [Source:HGNC Symbol;Acc:HGNC:31009]	ENSG00000238227	90120	HGNC Symbol	TMEM250	protein_coding	5	1.7243	2.2054	1.4614	10.687	1.2152e-08	9.7114e-06	10.165
cytochrome b5 type A [Source:HGNC Symbol;Acc:HGNC:2570]	ENSG00000166347	1528	HGNC Symbol	CYB5A	protein_coding	7	5.8835	2.102	6.1763	10.707	1.1839e-08	9.7114e-06	10.189
C1GALT1 specific chaperone 1 [Source:HGNC Symbol;Acc:HGNC:24338]	ENSG00000171155	29071	HGNC Symbol	C1GALT1C1	protein_coding	2	6.4022	2.5772	6.3975	10.51	1.5341e-08	1.0728e-05	9.9451
methionine sulfoxide reductase B1 [Source:HGNC Symbol;Acc:HGNC:14133]	ENSG00000198736	51734	HGNC Symbol	MSRB1	protein_coding	6	4.6673	2.1105	4.5021	10.444	1.6747e-08	1.0728e-05	9.8623
jagunal homolog 1 [Source:HGNC Symbol;Acc:HGNC:26926]	ENSG00000171135	84522	HGNC Symbol	JAGN1	protein_coding	3	5.1356	1.7591	5.1217	10.433	1.7004e-08	1.0728e-05	9.8479
lamin B1 [Source:HGNC Symbol;Acc:HGNC:6637]	ENSG00000113368	4001	HGNC Symbol	LMNB1	protein_coding	8	3.5317	-2.288	3.3104	-10.527	1.4993e-08	1.0728e-05	9.9667
histone cluster 1 H2B family member c [Source:HGNC Symbol;Acc:HGNC:4757]	ENSG00000180596	8347	HGNC Symbol	HIST1H2BC	protein_coding	2	2.0279	-3.9081	2.4496	-10.291	2.0557e-08	1.2321e-05	9.6684
H3 histone family member 3B [Source:HGNC Symbol;Acc:HGNC:4765]	ENSG00000132475	3021	HGNC Symbol	H3F3B	protein_coding	13	11.885	-1.8513	12.403	-10.088	2.7084e-08	1.5188e-05	9.4068
H3 histone family member 3C [Source:HGNC Symbol;Acc:HGNC:33164]	ENSG00000188375	440093	HGNC Symbol	H3F3C	protein_coding	1	5.6748	-1.9094	6.1798	-10.067	2.7874e-08	1.5188e-05	9.3794
microRNA 616 [Source:HGNC Symbol;Acc:HGNC:32872]	ENSG00000208028	NA	HGNC Symbol	MIR616	miRNA	1	1.7003	-4.9099	2.0809	-9.9926	3.0892e-08	1.61e-05	9.2817
autophagy related 101 [Source:HGNC Symbol;Acc:HGNC:25679]	ENSG00000123395	60673	HGNC Symbol	ATG101	protein_coding	7	3.6606	2.3265	3.6117	9.7618	4.2581e-08	1.9631e-05	8.9758
serine palmitoyltransferase small subunit A [Source:HGNC Symbol;Acc:HGNC:20361]	ENSG00000165389	171546	HGNC Symbol	SPTSSA	protein_coding	1	6.2761	2.2479	6.2522	9.7628	4.252e-08	1.9631e-05	8.9772
zinc finger protein 331 [Source:HGNC Symbol;Acc:HGNC:15489]	ENSG00000130844	55422	HGNC Symbol	ZNF331	protein_coding	31	4.8144	-2.87	4.5914	-9.784	4.1278e-08	1.9631e-05	9.0055
INTS3 and NABP interacting protein [Source:HGNC Symbol;Acc:HGNC:24994]	ENSG00000148153	58493	HGNC Symbol	INIP	protein_coding	6	6.7475	1.8129	6.5511	9.6252	5.162e-08	2.2663e-05	8.7918
ZNF674 antisense RNA 1 (head to head) [Source:HGNC Symbol;Acc:HGNC:44266]	ENSG00000230844	NA	HGNC Symbol	ZNF674-AS1	lincRNA	2	3.3644	-1.9355	3.6364	-9.6074	5.2938e-08	2.2663e-05	8.7677
laccase domain containing 1 [Source:HGNC Symbol;Acc:HGNC:26789]	ENSG00000179630	144811	HGNC Symbol	LACC1	protein_coding	3	2.2917	4.2912	2.2459	9.4873	6.283e-08	2.5971e-05	8.6036
ORMDL sphingolipid biosynthesis regulator 2 [Source:HGNC Symbol;Acc:HGNC:16037]	ENSG00000123353	29095	HGNC Symbol	ORMDL2	protein_coding	5	5.2232	1.7272	5.1145	9.4087	7.0338e-08	2.8105e-05	8.4954
JunD proto-oncogene, AP-1 transcription factor subunit [Source:HGNC Symbol;Acc:HGNC:6206]	ENSG00000130522	3727	HGNC Symbol	JUND	protein_coding	2	5.1456	-2.2131	5.8028	-9.3145	8.0597e-08	2.968e-05	8.3646
ermin [Source:HGNC Symbol;Acc:HGNC:29208]	ENSG00000136541	57471	HGNC Symbol	ERMN	protein_coding	9	2.4452	-2.5798	2.3817	-9.305	8.171e-08	2.968e-05	8.3514
JunB proto-oncogene, AP-1 transcription factor subunit [Source:HGNC Symbol;Acc:HGNC:6205]	ENSG00000171223	3726	HGNC Symbol	JUNB	protein_coding	1	1.6665	-2.7866	2.5494	-9.3474	7.6839e-08	2.968e-05	8.4105
ring finger protein 139 [Source:HGNC Symbol;Acc:HGNC:17023]	ENSG00000170881	11236	HGNC Symbol	RNF139	protein_coding	2	4.8827	-2.3769	4.7211	-9.2194	9.2569e-08	3.2636e-05	8.2315
actin like 6A [Source:HGNC Symbol;Acc:HGNC:24124]	ENSG00000136518	86	HGNC Symbol	ACTL6A	protein_coding	14	6.3726	1.923	6.2384	9.1785	9.8276e-08	3.3658e-05	8.1739
CD53 molecule [Source:HGNC Symbol;Acc:HGNC:1686]	ENSG00000143119	963	HGNC Symbol	CD53	protein_coding	6	10.847	2.2724	11.086	9.1476	1.0283e-07	3.3916e-05	8.1302
GON7, KEOPS complex subunit [Source:HGNC Symbol;Acc:HGNC:20356]	ENSG00000170270	84520	HGNC Symbol	GON7	protein_coding	2	4.1323	1.9401	3.8627	9.1354	1.0469e-07	3.3916e-05	8.113
C-C motif chemokine ligand 4 [Source:HGNC Symbol;Acc:HGNC:10630]	ENSG00000275302	6351	HGNC Symbol	CCL4	protein_coding	3	11.686	3.0664	12.315	9.0657	1.1603e-07	3.6055e-05	8.0139
TNFRSF1A associated via death domain [Source:HGNC Symbol;Acc:HGNC:12030]	ENSG00000102871	8717	HGNC Symbol	TRADD	protein_coding	5	3.4848	2.0731	3.7129	9.0583	1.1731e-07	3.6055e-05	8.0033
RNA binding motif protein 15 [Source:HGNC Symbol;Acc:HGNC:14959]	ENSG00000162775	64783	HGNC Symbol	RBM15	protein_coding	8	3.4458	-1.8293	3.4817	-8.894	1.4982e-07	4.4899e-05	7.7672
lysine rich coiled-coil 1 [Source:HGNC Symbol;Acc:HGNC:28039]	ENSG00000172086	51315	HGNC Symbol	KRCC1	protein_coding	1	5.2575	2.3041	4.7092	8.829	1.6519e-07	4.8295e-05	7.6728
small integral membrane protein 30 [Source:HGNC Symbol;Acc:HGNC:48953]	ENSG00000214194	401397	HGNC Symbol	SMIM30	protein_coding	4	5.5741	1.8765	5.1594	8.7718	1.8007e-07	5.0197e-05	7.5894
zinc finger and BTB domain containing 10 [Source:HGNC Symbol;Acc:HGNC:30953]	ENSG00000205189	65986	HGNC Symbol	ZBTB10	protein_coding	5	3.3876	-2.5913	3.4409	-8.7752	1.7916e-07	5.0197e-05	7.5943
CCAAT enhancer binding protein delta [Source:HGNC Symbol;Acc:HGNC:1835]	ENSG00000221869	1052	HGNC Symbol	CEBPD	protein_coding	1	3.3401	1.9914	2.834	8.7362	1.9006e-07	5.1778e-05	7.5371
aldehyde dehydrogenase 1 family member B1 [Source:HGNC Symbol;Acc:HGNC:407]	ENSG00000137124	219	HGNC Symbol	ALDH1B1	protein_coding	2	3.5111	2.1134	3.7327	8.696	2.0203e-07	5.2645e-05	7.478
zinc finger protein 576 [Source:HGNC Symbol;Acc:HGNC:28357]	ENSG00000124444	79177	HGNC Symbol	ZNF576	protein_coding	7	3.7342	1.6403	3.4418	8.6978	2.0147e-07	5.2645e-05	7.4806
dehydrogenase/reductase 7B [Source:HGNC Symbol;Acc:HGNC:24547]	ENSG00000109016	25979	HGNC Symbol	DHRS7B	protein_coding	10	5.227	1.8311	5.035	8.665	2.1181e-07	5.4019e-05	7.4322
uridine monophosphate synthetase [Source:HGNC Symbol;Acc:HGNC:12563]	ENSG00000114491	7372	HGNC Symbol	UMPS	protein_coding	11	6.3834	2.7468	6.1509	8.6201	2.2683e-07	5.4422e-05	7.3657
pyridoxal phosphate binding protein [Source:HGNC Symbol;Acc:HGNC:9457]	ENSG00000147471	11212	HGNC Symbol	PLPBP	protein_coding	9	5.2132	1.5186	5.0251	8.6211	2.2647e-07	5.4422e-05	7.3673
chromosome 16 open reading frame 87 [Source:HGNC Symbol;Acc:HGNC:33754]	ENSG00000155330	388272	HGNC Symbol	C16orf87	protein_coding	4	4.4363	-1.6142	4.6976	-8.6196	2.2701e-07	5.4422e-05	7.365
chromosome 14 open reading frame 119 [Source:HGNC Symbol;Acc:HGNC:20270]	ENSG00000179933	55017	HGNC Symbol	C14orf119	protein_coding	2	7.2122	2.3207	6.6709	8.6052	2.3208e-07	5.4549e-05	7.3435
testis expressed 30 [Source:HGNC Symbol;Acc:HGNC:25188]	ENSG00000151287	93081	HGNC Symbol	TEX30	protein_coding	7	5.9279	2.1614	5.6823	8.5882	2.382e-07	5.491e-05	7.3183
solute carrier family 25 member 19 [Source:HGNC Symbol;Acc:HGNC:14409]	ENSG00000125454	60386	HGNC Symbol	SLC25A19	protein_coding	15	5.3819	2.7195	5.3752	8.5725	2.44e-07	5.5186e-05	7.295
interleukin 1 receptor associated kinase 2 [Source:HGNC Symbol;Acc:HGNC:6113]	ENSG00000134070	3656	HGNC Symbol	IRAK2	protein_coding	1	4.8047	2.8074	4.9377	8.5468	2.5386e-07	5.6351e-05	7.2565
dynein light chain LC8-type 1 [Source:HGNC Symbol;Acc:HGNC:15476]	ENSG00000088986	8655	HGNC Symbol	DYNLL1	protein_coding	11	7.9658	2.3048	7.4676	8.4754	2.8344e-07	5.9918e-05	7.1495
GDNF inducible zinc finger protein 1 [Source:HGNC Symbol;Acc:HGNC:15808]	ENSG00000125812	64412	HGNC Symbol	GZF1	protein_coding	5	3.1649	-1.8499	3.1565	-8.4893	2.774e-07	5.9918e-05	7.1704
histone cluster 1 H1 family member e [Source:HGNC Symbol;Acc:HGNC:4718]	ENSG00000168298	3008	HGNC Symbol	HIST1H1E	protein_coding	1	2.2554	-3.9057	2.6635	-8.472	2.8492e-07	5.9918e-05	7.1445
C-C motif chemokine ligand 3 [Source:HGNC Symbol;Acc:HGNC:10627]	ENSG00000277632	6348	HGNC Symbol	CCL3	protein_coding	3	10.386	3.0023	11.485	8.4513	2.9421e-07	6.0806e-05	7.1133
McKusick-Kaufman syndrome [Source:HGNC Symbol;Acc:HGNC:7108]	ENSG00000125863	8195	HGNC Symbol	MKKS	protein_coding	4	4.5828	1.8897	4.2468	8.4222	3.0782e-07	6.1496e-05	7.0694
DEAD-box helicase 6 [Source:HGNC Symbol;Acc:HGNC:2747]	ENSG00000110367	1656	HGNC Symbol	DDX6	protein_coding	8	6.654	-2.3341	6.6712	-8.4303	3.0394e-07	6.1496e-05	7.0817
activating transcription factor 3 [Source:HGNC Symbol;Acc:HGNC:785]	ENSG00000162772	467	HGNC Symbol	ATF3	protein_coding	11	2.4677	-2.5587	3.101	-8.3939	3.2166e-07	6.2189e-05	7.0266
dual specificity phosphatase 1 [Source:HGNC Symbol;Acc:HGNC:3064]	ENSG00000120129	1843	HGNC Symbol	DUSP1	protein_coding	1	5.062	-3.5023	6.4395	-8.3973	3.1994e-07	6.2189e-05	7.0318
phosphatidylinositol 4-kinase type 2 alpha [Source:HGNC Symbol;Acc:HGNC:30031]	ENSG00000155252	55361	HGNC Symbol	PI4K2A	protein_coding	1	4.4299	-2.368	4.123	-8.3817	3.2783e-07	6.2376e-05	7.0081
protein tyrosine phosphatase type IVA, member 1 [Source:HGNC Symbol;Acc:HGNC:9634]	ENSG00000112245	7803	HGNC Symbol	PTP4A1	protein_coding	6	4.6569	-1.7571	4.9308	-8.3566	3.4096e-07	6.3862e-05	6.9699
transmembrane protein 216 [Source:HGNC Symbol;Acc:HGNC:25018]	ENSG00000187049	51259	HGNC Symbol	TMEM216	protein_coding	5	5.4621	1.5611	5.274	8.3437	3.4791e-07	6.416e-05	6.9503
FA complementation group E [Source:HGNC Symbol;Acc:HGNC:3586]	ENSG00000112039	2178	HGNC Symbol	FANCE	protein_coding	2	2.7632	1.9855	2.2722	8.2544	4.0023e-07	7.269e-05	6.814
MIR181A1 host gene [Source:HGNC Symbol;Acc:HGNC:48659]	ENSG00000229989	NA	HGNC Symbol	MIR181A1HG	lincRNA	3	3.8848	-1.8733	3.9676	-8.2406	4.0906e-07	7.3185e-05	6.7927
MYC binding protein [Source:HGNC Symbol;Acc:HGNC:7554]	ENSG00000214114	26292	HGNC Symbol	MYCBP	protein_coding	4	5.38	1.6336	5.3859	8.2246	4.1952e-07	7.3952e-05	6.7681
UDP-GlcNAc:betaGal beta-1,3-N-acetylglucosaminyltransferase 7 [Source:HGNC Symbol;Acc:HGNC:18811]	ENSG00000156966	93010	HGNC Symbol	B3GNT7	protein_coding	2	4.2518	-3.1915	4.1061	-8.2118	4.2807e-07	7.4366e-05	6.7485
Josephin domain containing 1 [Source:HGNC Symbol;Acc:HGNC:28953]	ENSG00000100221	9929	HGNC Symbol	JOSD1	protein_coding	10	5.0599	-1.6551	5.1085	-8.2017	4.3493e-07	7.4479e-05	6.733
adenylate kinase 6 [Source:HGNC Symbol;Acc:HGNC:49151]	ENSG00000085231	102157402	HGNC Symbol	AK6	protein_coding	5	6.0704	2.3792	5.9366	8.166	4.6028e-07	7.7709e-05	6.6778
FKBP prolyl isomerase 2 [Source:HGNC Symbol;Acc:HGNC:3718]	ENSG00000173486	2286	HGNC Symbol	FKBP2	protein_coding	9	5.3278	2.2338	5.7872	8.1374	4.8165e-07	8.0187e-05	6.6336
phosphatidylinositol glycan anchor biosynthesis class V [Source:HGNC Symbol;Acc:HGNC:26031]	ENSG00000060642	55650	HGNC Symbol	PIGV	protein_coding	6	6.3273	3.7129	6.6123	8.1206	4.9469e-07	8.123e-05	6.6075
thioredoxin domain containing 9 [Source:HGNC Symbol;Acc:HGNC:24110]	ENSG00000115514	10190	HGNC Symbol	TXNDC9	protein_coding	9	6.8692	1.5577	6.6431	8.0549	5.4939e-07	8.7807e-05	6.5052
ring finger protein 103 [Source:HGNC Symbol;Acc:HGNC:12859]	ENSG00000239305	7844	HGNC Symbol	RNF103	protein_coding	6	3.0092	-2.8175	2.6582	-8.0577	5.4692e-07	8.7807e-05	6.5096
IKBKB interacting protein [Source:HGNC Symbol;Acc:HGNC:26430]	ENSG00000166130	121457	HGNC Symbol	IKBIP	protein_coding	3	2.9412	2.2752	2.8697	8.0242	5.7706e-07	9.0633e-05	6.4572
eEF1A lysine and N-terminal methyltransferase [Source:HGNC Symbol;Acc:HGNC:24248]	ENSG00000010165	51603	HGNC Symbol	EEF1AKNMT	protein_coding	7	4.8809	1.4819	4.835	8.0177	5.8307e-07	9.0633e-05	6.4471
tRNA-histidine guanylyltransferase 1 like [Source:HGNC Symbol;Acc:HGNC:26053]	ENSG00000113272	54974	HGNC Symbol	THG1L	protein_coding	3	5.4776	1.3857	5.249	8.0106	5.8975e-07	9.0633e-05	6.436
SERTA domain containing 1 [Source:HGNC Symbol;Acc:HGNC:17932]	ENSG00000197019	29950	HGNC Symbol	SERTAD1	protein_coding	1	3.0364	-2.0376	3.0995	-7.9824	6.171e-07	9.3635e-05	6.3917
oxidative stress responsive serine rich 1 [Source:HGNC Symbol;Acc:HGNC:16105]	ENSG00000132823	51526	HGNC Symbol	OSER1	protein_coding	2	7.3022	-2.1389	6.7103	-7.9671	6.3251e-07	9.4774e-05	6.3676
NME/NM23 nucleoside diphosphate kinase 6 [Source:HGNC Symbol;Acc:HGNC:20567]	ENSG00000172113	10201	HGNC Symbol	NME6	protein_coding	22	5.8571	1.5115	5.7693	7.9093	6.9434e-07	0.00010275	6.2765
NudC domain containing 1 [Source:HGNC Symbol;Acc:HGNC:24306]	ENSG00000120526	84955	HGNC Symbol	NUDCD1	protein_coding	4	5.4094	3.496	5.5912	7.9012	7.0353e-07	0.00010284	6.2637
peroxiredoxin 3 [Source:HGNC Symbol;Acc:HGNC:9354]	ENSG00000165672	10935	HGNC Symbol	PRDX3	protein_coding	3	8.625	3.3467	8.4423	7.8835	7.2406e-07	0.00010333	6.2355
solute carrier family 25 member 17 [Source:HGNC Symbol;Acc:HGNC:10987]	ENSG00000100372	10478	HGNC Symbol	SLC25A17	protein_coding	17	6.0613	1.539	5.9787	7.888	7.1872e-07	0.00010333	6.2428
ornithine decarboxylase antizyme 1 [Source:HGNC Symbol;Acc:HGNC:8095]	ENSG00000104904	4946	HGNC Symbol	OAZ1	protein_coding	11	7.7795	1.5	7.9643	7.8695	7.407e-07	0.00010446	6.2133
TCDD inducible poly(ADP-ribose) polymerase [Source:HGNC Symbol;Acc:HGNC:23696]	ENSG00000163659	25976	HGNC Symbol	TIPARP	protein_coding	7	4.2215	-2.7378	4.1803	-7.8538	7.5976e-07	0.0001059	6.1885
chromosome 9 open reading frame 64 [Source:HGNC Symbol;Acc:HGNC:28144]	ENSG00000165118	84267	HGNC Symbol	C9orf64	protein_coding	3	2.8102	2.0141	2.3956	7.8323	7.8685e-07	0.00010841	6.1542
ChaC glutathione specific gamma-glutamylcyclotransferase 1 [Source:HGNC Symbol;Acc:HGNC:28680]	ENSG00000128965	79094	HGNC Symbol	CHAC1	protein_coding	3	1.4578	3.7069	1.7443	7.7923	8.3993e-07	0.00011441	6.0903
ribonuclease P/MRP subunit p25 like [Source:HGNC Symbol;Acc:HGNC:19909]	ENSG00000164967	138716	HGNC Symbol	RPP25L	protein_coding	2	4.415	1.6634	4.1921	7.7751	8.6382e-07	0.00011634	6.0629
prostaglandin E receptor 2 [Source:HGNC Symbol;Acc:HGNC:9594]	ENSG00000125384	5732	HGNC Symbol	PTGER2	protein_coding	2	5.2343	1.5414	5.3942	7.7409	9.1351e-07	0.00012167	6.0081
Bet1 golgi vesicular membrane trafficking protein [Source:HGNC Symbol;Acc:HGNC:14562]	ENSG00000105829	10282	HGNC Symbol	BET1	protein_coding	8	5.8483	2.0954	5.6014	7.7296	9.3075e-07	0.0001226	5.9898
TNF superfamily member 10 [Source:HGNC Symbol;Acc:HGNC:11925]	ENSG00000121858	8743	HGNC Symbol	TNFSF10	protein_coding	6	7.485	2.4219	7.492	7.6499	1.0613e-06	0.00013115	5.8613
mitoregulin [Source:HGNC Symbol;Acc:HGNC:27339]	ENSG00000175701	205251	HGNC Symbol	MTLN	protein_coding	3	4.0839	1.9587	4.0273	7.6683	1.0295e-06	0.00013115	5.8911
mitochondrial ribosomal protein L46 [Source:HGNC Symbol;Acc:HGNC:1192]	ENSG00000259494	26589	HGNC Symbol	MRPL46	protein_coding	5	5.6574	1.5448	5.2773	7.6508	1.0596e-06	0.00013115	5.8628
TSPY like 2 [Source:HGNC Symbol;Acc:HGNC:24358]	ENSG00000184205	64061	HGNC Symbol	TSPYL2	protein_coding	6	2.9474	-2.3206	3.5017	-7.6632	1.0382e-06	0.00013115	5.8828
histone cluster 1 H2B family member n [Source:HGNC Symbol;Acc:HGNC:4749]	ENSG00000233822	8341	HGNC Symbol	HIST1H2BN	protein_coding	4	1.6912	-2.69	1.6352	-7.6698	1.0269e-06	0.00013115	5.8935
phosphoinositide-3-kinase regulatory subunit 1 [Source:HGNC Symbol;Acc:HGNC:8979]	ENSG00000145675	5295	HGNC Symbol	PIK3R1	protein_coding	16	5.6231	-3.3301	5.4587	-7.6572	1.0485e-06	0.00013115	5.8731
mannosidase beta like [Source:HGNC Symbol;Acc:HGNC:15799]	ENSG00000101363	63905	HGNC Symbol	MANBAL	protein_coding	5	4.4509	1.5909	4.5423	7.6319	1.0932e-06	0.00013236	5.8323
zinc finger AN1-type containing 5 [Source:HGNC Symbol;Acc:HGNC:13008]	ENSG00000107372	7763	HGNC Symbol	ZFAND5	protein_coding	8	5.4855	-1.6508	5.4372	-7.6346	1.0883e-06	0.00013236	5.8366
Fas ligand [Source:HGNC Symbol;Acc:HGNC:11936]	ENSG00000117560	356	HGNC Symbol	FASLG	protein_coding	2	6.7632	2.2589	6.9119	7.6004	1.1517e-06	0.000137	5.7811
ADP ribosylation factor like GTPase 6 interacting protein 6 [Source:HGNC Symbol;Acc:HGNC:24048]	ENSG00000177917	151188	HGNC Symbol	ARL6IP6	protein_coding	5	4.0069	1.6419	3.6963	7.5991	1.1543e-06	0.000137	5.7789
zinc finger protein 232 [Source:HGNC Symbol;Acc:HGNC:13026]	ENSG00000167840	7775	HGNC Symbol	ZNF232	protein_coding	8	4.3792	2.1395	3.9232	7.5382	1.2772e-06	0.00014443	5.6797
NADH:ubiquinone oxidoreductase subunit A8 [Source:HGNC Symbol;Acc:HGNC:7692]	ENSG00000119421	4702	HGNC Symbol	NDUFA8	protein_coding	1	4.9275	1.8022	4.755	7.5406	1.2722e-06	0.00014443	5.6836
cytochrome c oxidase assembly factor 3 [Source:HGNC Symbol;Acc:HGNC:24990]	ENSG00000183978	28958	HGNC Symbol	COA3	protein_coding	2	6.6312	1.6984	6.4536	7.5557	1.2406e-06	0.00014443	5.7083
cAMP responsive element binding protein 3 [Source:HGNC Symbol;Acc:HGNC:2347]	ENSG00000107175	10488	HGNC Symbol	CREB3	protein_coding	2	4.7114	1.4127	4.8556	7.5547	1.2427e-06	0.00014443	5.7066
cyclin L1 [Source:HGNC Symbol;Acc:HGNC:20569]	ENSG00000163660	57018	HGNC Symbol	CCNL1	protein_coding	26	6.8488	-1.7407	7.2335	-7.5496	1.2532e-06	0.00014443	5.6983
mitochondrial ribosomal protein S16 [Source:HGNC Symbol;Acc:HGNC:14048]	ENSG00000182180	51021	HGNC Symbol	MRPS16	protein_coding	5	5.7097	1.3778	5.5552	7.5131	1.3318e-06	0.00014782	5.6387
SERTA domain containing 3 [Source:HGNC Symbol;Acc:HGNC:17931]	ENSG00000167565	29946	HGNC Symbol	SERTAD3	protein_coding	5	3.3437	-3.3674	3.3342	-7.5143	1.3292e-06	0.00014782	5.6405
transmembrane protein 60 [Source:HGNC Symbol;Acc:HGNC:21754]	ENSG00000135211	85025	HGNC Symbol	TMEM60	protein_coding	1	5.4052	2.2232	4.596	7.4942	1.3747e-06	0.00015002	5.6075
regulator of cell cycle [Source:HGNC Symbol;Acc:HGNC:20369]	ENSG00000102760	28984	HGNC Symbol	RGCC	protein_coding	2	1.5727	-2.8443	1.5639	-7.4933	1.3767e-06	0.00015002	5.6061
Jun proto-oncogene, AP-1 transcription factor subunit [Source:HGNC Symbol;Acc:HGNC:6204]	ENSG00000177606	3725	HGNC Symbol	JUN	protein_coding	1	2.282	-3.3853	3.6239	-7.4759	1.4173e-06	0.00015305	5.5776
ankyrin repeat and KH domain containing 1 [Source:HGNC Symbol;Acc:HGNC:24714]	ENSG00000131503	54882	HGNC Symbol	ANKHD1	protein_coding	21	1.8849	-2.2225	1.6205	-7.4677	1.437e-06	0.00015369	5.564
family with sequence similarity 53 member C [Source:HGNC Symbol;Acc:HGNC:1336]	ENSG00000120709	51307	HGNC Symbol	FAM53C	protein_coding	11	4.7491	-2.4303	4.4605	-7.4628	1.4488e-06	0.00015369	5.556
FKBP prolyl isomerase 5 [Source:HGNC Symbol;Acc:HGNC:3721]	ENSG00000096060	2289	HGNC Symbol	FKBP5	protein_coding	4	7.0183	3.3984	6.4032	7.4488	1.4833e-06	0.00015597	5.5329
peptidylprolyl isomerase like 1 [Source:HGNC Symbol;Acc:HGNC:9260]	ENSG00000137168	51645	HGNC Symbol	PPIL1	protein_coding	2	5.1619	3.3746	5.0808	7.4425	1.499e-06	0.00015625	5.5226
YES proto-oncogene 1, Src family tyrosine kinase [Source:HGNC Symbol;Acc:HGNC:12841]	ENSG00000176105	7525	HGNC Symbol	YES1	protein_coding	5	4.4696	-1.9722	4.3048	-7.4305	1.5294e-06	0.00015804	5.5029
cyclin K [Source:HGNC Symbol;Acc:HGNC:1596]	ENSG00000090061	8812	HGNC Symbol	CCNK	protein_coding	9	2.3118	-1.74	2.6042	-7.4221	1.5513e-06	0.00015854	5.4889
tumor protein p53 inducible nuclear protein 2 [Source:HGNC Symbol;Acc:HGNC:16104]	ENSG00000078804	58476	HGNC Symbol	TP53INP2	protein_coding	4	1.4936	-2.4515	1.6722	-7.4185	1.5607e-06	0.00015854	5.483
ectodermal-neural cortex 1 [Source:HGNC Symbol;Acc:HGNC:3345]	ENSG00000171617	8507	HGNC Symbol	ENC1	protein_coding	8	1.8782	-4.9454	1.315	-7.4127	1.576e-06	0.00015875	5.4734
fem-1 homolog C [Source:HGNC Symbol;Acc:HGNC:16933]	ENSG00000145780	56929	HGNC Symbol	FEM1C	protein_coding	1	3.521	-1.5466	3.3647	-7.3907	1.6356e-06	0.00016338	5.4369
cytokine inducible SH2 containing protein [Source:HGNC Symbol;Acc:HGNC:1984]	ENSG00000114737	1154	HGNC Symbol	CISH	protein_coding	3	3.5375	4.4933	4.0553	7.3748	1.68e-06	0.00016643	5.4106
protein arginine methyltransferase 6 [Source:HGNC Symbol;Acc:HGNC:18241]	ENSG00000198890	55170	HGNC Symbol	PRMT6	protein_coding	3	1.9891	2.3352	1.8003	7.3622	1.716e-06	0.0001686	5.3898
MOB kinase activator 3C [Source:HGNC Symbol;Acc:HGNC:29800]	ENSG00000142961	148932	HGNC Symbol	MOB3C	protein_coding	4	3.3021	1.8402	3.1398	7.3509	1.7492e-06	0.00017034	5.371
protein-L-isoaspartate (D-aspartate) O-methyltransferase [Source:HGNC Symbol;Acc:HGNC:8728]	ENSG00000120265	5110	HGNC Symbol	PCMT1	protein_coding	13	7.7573	1.1746	7.5737	7.3465	1.7621e-06	0.00017034	5.3637
cysteine and serine rich nuclear protein 1 [Source:HGNC Symbol;Acc:HGNC:14300]	ENSG00000144655	64651	HGNC Symbol	CSRNP1	protein_coding	2	2.5583	-2.4428	2.9792	-7.333	1.8029e-06	0.00017289	5.3413
caspase recruitment domain family member 6 [Source:HGNC Symbol;Acc:HGNC:16394]	ENSG00000132357	84674	HGNC Symbol	CARD6	protein_coding	2	3.5901	2.486	2.9408	7.3274	1.8202e-06	0.00017317	5.3318
aurora kinase A [Source:HGNC Symbol;Acc:HGNC:11393]	ENSG00000087586	6790	HGNC Symbol	AURKA	protein_coding	13	4.3592	2.5463	3.2657	7.3124	1.8669e-06	0.00017484	5.307
KAT8 regulatory NSL complex subunit 2 [Source:HGNC Symbol;Acc:HGNC:26024]	ENSG00000139620	54934	HGNC Symbol	KANSL2	protein_coding	15	6.7666	-1.5456	6.5775	-7.3156	1.857e-06	0.00017484	5.3122
mitochondrial ribosomal protein L51 [Source:HGNC Symbol;Acc:HGNC:14044]	ENSG00000111639	51258	HGNC Symbol	MRPL51	protein_coding	7	7.4849	2.0932	7.2385	7.2896	1.9408e-06	0.00017873	5.2688
centromere protein Q [Source:HGNC Symbol;Acc:HGNC:21347]	ENSG00000031691	55166	HGNC Symbol	CENPQ	protein_coding	1	4.0977	2.0592	3.4686	7.2942	1.9255e-06	0.00017873	5.2766
RNA guanine-7 methyltransferase [Source:HGNC Symbol;Acc:HGNC:10075]	ENSG00000101654	8731	HGNC Symbol	RNMT	protein_coding	10	5.8694	-1.2183	5.9071	-7.2858	1.9533e-06	0.00017873	5.2625
Jupiter microtubule associated homolog 2 [Source:HGNC Symbol;Acc:HGNC:14137]	ENSG00000206053	90861	HGNC Symbol	JPT2	protein_coding	14	3.502	2.035	3.4884	7.2437	2.0986e-06	0.00019057	5.192
MAF bZIP transcription factor F [Source:HGNC Symbol;Acc:HGNC:6780]	ENSG00000185022	23764	HGNC Symbol	MAFF	protein_coding	8	2.5343	-1.728	2.7792	-7.2274	2.1576e-06	0.00019301	5.1647
BTB domain containing 9 [Source:HGNC Symbol;Acc:HGNC:21228]	ENSG00000183826	114781	HGNC Symbol	BTBD9	protein_coding	9	3.3231	-2.0739	2.9646	-7.2285	2.1537e-06	0.00019301	5.1665
chloride intracellular channel 4 [Source:HGNC Symbol;Acc:HGNC:13518]	ENSG00000169504	25932	HGNC Symbol	CLIC4	protein_coding	4	1.9105	2.4438	1.8873	7.2187	2.1901e-06	0.00019446	5.15
pseudouridine synthase 3 [Source:HGNC Symbol;Acc:HGNC:25461]	ENSG00000110060	83480	HGNC Symbol	PUS3	protein_coding	5	5.221	1.9277	4.999	7.2081	2.2302e-06	0.00019513	5.1321
acyl-CoA dehydrogenase medium chain [Source:HGNC Symbol;Acc:HGNC:89]	ENSG00000117054	34	HGNC Symbol	ACADM	protein_coding	18	6.4025	1.7393	6.231	7.2122	2.2144e-06	0.00019513	5.1391
solute carrier family 39 member 1 [Source:HGNC Symbol;Acc:HGNC:12876]	ENSG00000143570	27173	HGNC Symbol	SLC39A1	protein_coding	11	4.6151	2.0639	4.9531	7.1944	2.2828e-06	0.00019686	5.1092
UTP6, small subunit processome component [Source:HGNC Symbol;Acc:HGNC:18279]	ENSG00000108651	55813	HGNC Symbol	UTP6	protein_coding	9	6.8484	1.6931	6.8001	7.1987	2.2664e-06	0.00019686	5.1163
BCL2 like 1 [Source:HGNC Symbol;Acc:HGNC:992]	ENSG00000171552	598	HGNC Symbol	BCL2L1	protein_coding	9	5.1527	2.8657	5.4696	7.1711	2.3761e-06	0.0002012	5.0698
C-X-C motif chemokine receptor 6 [Source:HGNC Symbol;Acc:HGNC:16647]	ENSG00000172215	10663	HGNC Symbol	CXCR6	protein_coding	4	5.8075	2.5399	4.2244	7.1734	2.3666e-06	0.0002012	5.0737
INO80 complex subunit C [Source:HGNC Symbol;Acc:HGNC:26994]	ENSG00000153391	125476	HGNC Symbol	INO80C	protein_coding	12	4.6609	1.1582	4.385	7.1692	2.3835e-06	0.0002012	5.0667
heterogeneous nuclear ribonucleoprotein F [Source:HGNC Symbol;Acc:HGNC:5039]	ENSG00000169813	3185	HGNC Symbol	HNRNPF	protein_coding	7	8.8263	1.8188	8.7255	7.1604	2.4201e-06	0.00020287	5.0517
NADH:ubiquinone oxidoreductase complex assembly factor 5 [Source:HGNC Symbol;Acc:HGNC:15899]	ENSG00000101247	79133	HGNC Symbol	NDUFAF5	protein_coding	16	4.4516	-1.5544	4.3243	-7.1533	2.4497e-06	0.00020392	5.0397
interferon induced protein with tetratricopeptide repeats 2 [Source:HGNC Symbol;Acc:HGNC:5409]	ENSG00000119922	3433	HGNC Symbol	IFIT2	protein_coding	3	4.2524	-4.7982	4.2781	-7.1277	2.5597e-06	0.00021161	4.9965
cyclin T1 [Source:HGNC Symbol;Acc:HGNC:1599]	ENSG00000129315	904	HGNC Symbol	CCNT1	protein_coding	6	5.7806	-1.9527	5.6814	-7.1219	2.5857e-06	0.00021229	4.9866
beta-1,4-galactosyltransferase 5 [Source:HGNC Symbol;Acc:HGNC:928]	ENSG00000158470	9334	HGNC Symbol	B4GALT5	protein_coding	1	6.4802	2.4727	6.2076	7.0653	2.8509e-06	0.00022632	4.8904
short coiled-coil protein [Source:HGNC Symbol;Acc:HGNC:20335]	ENSG00000153130	60592	HGNC Symbol	SCOC	protein_coding	11	5.8254	1.4874	5.6742	7.077	2.7937e-06	0.00022632	4.9104
family with sequence similarity 118 member B [Source:HGNC Symbol;Acc:HGNC:26110]	ENSG00000197798	79607	HGNC Symbol	FAM118B	protein_coding	10	5.5883	1.3031	5.2509	7.0732	2.8119e-06	0.00022632	4.904
DnaJ heat shock protein family (Hsp40) member B1 [Source:HGNC Symbol;Acc:HGNC:5270]	ENSG00000132002	3337	HGNC Symbol	DNAJB1	protein_coding	11	5.0281	-2.1223	5.0034	-7.0673	2.8408e-06	0.00022632	4.8939
helicase with zinc finger [Source:HGNC Symbol;Acc:HGNC:16878]	ENSG00000198265	9931	HGNC Symbol	HELZ	protein_coding	12	6.846	-2.4739	6.8473	-7.0681	2.8371e-06	0.00022632	4.8952
leucine rich repeat containing 14 [Source:HGNC Symbol;Acc:HGNC:20419]	ENSG00000160959	9684	HGNC Symbol	LRRC14	protein_coding	9	2.1793	2.0856	2.1631	7.045	2.9528e-06	0.00023286	4.8558
TOR signaling pathway regulator [Source:HGNC Symbol;Acc:HGNC:30231]	ENSG00000143155	261726	HGNC Symbol	TIPRL	protein_coding	2	6.3428	1.2694	6.2638	7.0234	3.0656e-06	0.00024018	4.8189
cytochrome c oxidase assembly factor 7 (putative) [Source:HGNC Symbol;Acc:HGNC:25716]	ENSG00000162377	65260	HGNC Symbol	COA7	protein_coding	2	4.2632	2.0909	4.0462	7.0069	3.1547e-06	0.00024263	4.7907
mitochondrial ribosomal protein L14 [Source:HGNC Symbol;Acc:HGNC:14279]	ENSG00000180992	64928	HGNC Symbol	MRPL14	protein_coding	1	6.2368	1.8886	6.1343	7.0063	3.1576e-06	0.00024263	4.7898
mitochondrial ribosomal protein L50 [Source:HGNC Symbol;Acc:HGNC:16654]	ENSG00000136897	54534	HGNC Symbol	MRPL50	protein_coding	1	6.1628	1.7093	6.0171	7.0093	3.1414e-06	0.00024263	4.7948
PAK1 interacting protein 1 [Source:HGNC Symbol;Acc:HGNC:20882]	ENSG00000111845	55003	HGNC Symbol	PAK1IP1	protein_coding	1	6.2106	2.6707	6.2294	6.9829	3.2888e-06	0.0002511	4.7496
nuclear factor, erythroid 2 like 3 [Source:HGNC Symbol;Acc:HGNC:7783]	ENSG00000050344	9603	HGNC Symbol	NFE2L3	protein_coding	3	2.6214	1.7274	2.2825	6.9717	3.3537e-06	0.00025284	4.7304
cyclin dependent kinase 17 [Source:HGNC Symbol;Acc:HGNC:8750]	ENSG00000059758	5128	HGNC Symbol	CDK17	protein_coding	12	4.9102	-1.5047	4.7779	-6.9729	3.3467e-06	0.00025284	4.7324
ATP binding cassette subfamily F member 2 [Source:HGNC Symbol;Acc:HGNC:71]	ENSG00000033050	10061	HGNC Symbol	ABCF2	protein_coding	5	7.073	2.195	7.3049	6.9427	3.5278e-06	0.00025944	4.6805
POP1 homolog, ribonuclease P/MRP subunit [Source:HGNC Symbol;Acc:HGNC:30129]	ENSG00000104356	10940	HGNC Symbol	POP1	protein_coding	4	4.4639	2.0075	4.2691	6.9506	3.4794e-06	0.00025944	4.6941
transmembrane protein 101 [Source:HGNC Symbol;Acc:HGNC:28653]	ENSG00000091947	84336	HGNC Symbol	TMEM101	protein_coding	8	6.3196	1.2137	6.266	6.9455	3.5103e-06	0.00025944	4.6854
THUMP domain containing 2 [Source:HGNC Symbol;Acc:HGNC:14890]	ENSG00000138050	80745	HGNC Symbol	THUMPD2	protein_coding	9	3.9233	-1.3835	3.7529	-6.9494	3.4866e-06	0.00025944	4.6921
ACD, shelterin complex subunit and telomerase recruitment factor [Source:HGNC Symbol;Acc:HGNC:25070]	ENSG00000102977	65057	HGNC Symbol	ACD	protein_coding	16	3.2807	1.0604	3.7866	6.9362	3.5681e-06	0.0002608	4.6693
BTG anti-proliferation factor 2 [Source:HGNC Symbol;Acc:HGNC:1131]	ENSG00000159388	7832	HGNC Symbol	BTG2	protein_coding	2	5.4893	-3.0086	5.72	-6.9315	3.5973e-06	0.00026134	4.6613
DDB1 and CUL4 associated factor 12 [Source:HGNC Symbol;Acc:HGNC:19911]	ENSG00000198876	25853	HGNC Symbol	DCAF12	protein_coding	5	4.3531	1.4137	3.8329	6.9278	3.6209e-06	0.00026147	4.6548
zinc finger protein 394 [Source:HGNC Symbol;Acc:HGNC:18832]	ENSG00000160908	84124	HGNC Symbol	ZNF394	protein_coding	9	4.6645	-2.2939	4.5319	-6.9227	3.6534e-06	0.00026223	4.646
transmembrane protein 177 [Source:HGNC Symbol;Acc:HGNC:28143]	ENSG00000144120	80775	HGNC Symbol	TMEM177	protein_coding	6	2.472	2.2018	2.4879	6.8898	3.8695e-06	0.00027609	4.5893
glucoside xylosyltransferase 1 [Source:HGNC Symbol;Acc:HGNC:27482]	ENSG00000151233	283464	HGNC Symbol	GXYLT1	protein_coding	2	2.863	-1.8284	2.8484	-6.8826	3.9192e-06	0.00027798	4.5768
G protein-coupled receptor 171 [Source:HGNC Symbol;Acc:HGNC:30057]	ENSG00000174946	29909	HGNC Symbol	GPR171	protein_coding	3	6.7992	3.5986	6.5169	6.8695	4.0102e-06	0.00028277	4.5541
serine and arginine rich splicing factor 2 [Source:HGNC Symbol;Acc:HGNC:10783]	ENSG00000161547	6427	HGNC Symbol	SRSF2	protein_coding	11	6.7834	-1.2462	6.9552	-6.859	4.0845e-06	0.00028632	4.536
unc-50 inner nuclear membrane RNA binding protein [Source:HGNC Symbol;Acc:HGNC:16046]	ENSG00000115446	25972	HGNC Symbol	UNC50	protein_coding	6	5.2282	1.3272	5.1207	6.8538	4.122e-06	0.00028727	4.527
regulator of G protein signaling 2 [Source:HGNC Symbol;Acc:HGNC:9998]	ENSG00000116741	5997	HGNC Symbol	RGS2	protein_coding	4	5.4529	-3.9137	5.6158	-6.8319	4.2843e-06	0.00029685	4.4889
small nuclear RNA activating complex polypeptide 1 [Source:HGNC Symbol;Acc:HGNC:11134]	ENSG00000023608	6617	HGNC Symbol	SNAPC1	protein_coding	1	3.9018	2.2275	3.9331	6.813	4.4297e-06	0.00029999	4.456
tRNA-yW synthesizing protein 3 homolog [Source:HGNC Symbol;Acc:HGNC:24757]	ENSG00000162623	127253	HGNC Symbol	TYW3	protein_coding	8	5.3231	1.1883	5.0932	6.8182	4.3888e-06	0.00029999	4.4651
NECAP endocytosis associated 1 [Source:HGNC Symbol;Acc:HGNC:24539]	ENSG00000089818	25977	HGNC Symbol	NECAP1	protein_coding	27	6.3564	-1.5056	6.4328	-6.8155	4.4097e-06	0.00029999	4.4604
DnaJ heat shock protein family (Hsp40) member B4 [Source:HGNC Symbol;Acc:HGNC:14886]	ENSG00000162616	11080	HGNC Symbol	DNAJB4	protein_coding	6	4.1917	-1.9709	3.9906	-6.8168	4.3996e-06	0.00029999	4.4627
NADH:ubiquinone oxidoreductase subunit B3 [Source:HGNC Symbol;Acc:HGNC:7698]	ENSG00000119013	4709	HGNC Symbol	NDUFB3	protein_coding	4	6.3943	2.1296	6.1605	6.797	4.5564e-06	0.00030684	4.4282
ChaC cation transport regulator homolog 2 [Source:HGNC Symbol;Acc:HGNC:32363]	ENSG00000143942	494143	HGNC Symbol	CHAC2	protein_coding	1	3.68	3.4382	3.6357	6.788	4.6295e-06	0.00030713	4.4124
prolactin regulatory element binding [Source:HGNC Symbol;Acc:HGNC:9356]	ENSG00000138073	10113	HGNC Symbol	PREB	protein_coding	9	4.2382	1.649	4.436	6.7896	4.6165e-06	0.00030713	4.4152
cell migration inducing hyaluronidase 2 [Source:HGNC Symbol;Acc:HGNC:11869]	ENSG00000135048	23670	HGNC Symbol	CEMIP2	protein_coding	13	6.0717	-3.7719	5.8734	-6.787	4.6375e-06	0.00030713	4.4107
early growth response 2 [Source:HGNC Symbol;Acc:HGNC:3239]	ENSG00000122877	1959	HGNC Symbol	EGR2	protein_coding	6	4.0546	2.967	4.3203	6.7809	4.6875e-06	0.00030873	4.4001
nudix hydrolase 5 [Source:HGNC Symbol;Acc:HGNC:8052]	ENSG00000165609	11164	HGNC Symbol	NUDT5	protein_coding	9	6.8124	1.5709	6.7644	6.7462	4.9849e-06	0.00032506	4.3394
mesoderm development LRP chaperone [Source:HGNC Symbol;Acc:HGNC:13520]	ENSG00000117899	23184	HGNC Symbol	MESD	protein_coding	7	6.9	1.3548	7.0968	6.7426	5.0168e-06	0.00032506	4.3331
solute carrier family 25 member 36 [Source:HGNC Symbol;Acc:HGNC:25554]	ENSG00000114120	55186	HGNC Symbol	SLC25A36	protein_coding	16	4.4836	-2.2002	4.316	-6.7434	5.0097e-06	0.00032506	4.3345
histone cluster 1 H1 family member d [Source:HGNC Symbol;Acc:HGNC:4717]	ENSG00000124575	3007	HGNC Symbol	HIST1H1D	protein_coding	1	2.6082	-3.4377	2.5628	-6.7307	5.124e-06	0.00033022	4.3123
Hikeshi, heat shock protein nuclear import factor [Source:HGNC Symbol;Acc:HGNC:26938]	ENSG00000149196	51501	HGNC Symbol	HIKESHI	protein_coding	8	6.8369	1.4005	6.8052	6.7233	5.1912e-06	0.00033277	4.2994
small nucleolar RNA, C/D box 87 [Source:HGNC Symbol;Acc:HGNC:32746]	ENSG00000254341	NA	HGNC Symbol	SNORD87	snoRNA	1	1.9524	-2.0273	2.2271	-6.719	5.2309e-06	0.00033352	4.2919
spindle apparatus coiled-coil protein 1 [Source:HGNC Symbol;Acc:HGNC:26010]	ENSG00000040275	54908	HGNC Symbol	SPDL1	protein_coding	16	4.9585	2.6537	4.6285	6.7099	5.3166e-06	0.0003372	4.2758
peptidyl-tRNA hydrolase 2 [Source:HGNC Symbol;Acc:HGNC:24265]	ENSG00000141378	51651	HGNC Symbol	PTRH2	protein_coding	5	5.1313	2.4145	5.0668	6.6717	5.6907e-06	0.00035714	4.2087
nuclear receptor subfamily 4 group A member 2 [Source:HGNC Symbol;Acc:HGNC:7981]	ENSG00000153234	4929	HGNC Symbol	NR4A2	protein_coding	10	3.4262	-4.0409	3.7769	-6.6732	5.6751e-06	0.00035714	4.2114
inducible T cell costimulator [Source:HGNC Symbol;Acc:HGNC:5351]	ENSG00000163600	29851	HGNC Symbol	ICOS	protein_coding	2	3.5563	3.8343	3.2251	6.6665	5.7433e-06	0.00035857	4.1996
proteasome subunit alpha 5 [Source:HGNC Symbol;Acc:HGNC:9534]	ENSG00000143106	5686	HGNC Symbol	PSMA5	protein_coding	6	8.398	2.0268	8.4669	6.6614	5.7967e-06	0.00036003	4.1905
mediator complex subunit 20 [Source:HGNC Symbol;Acc:HGNC:16840]	ENSG00000124641	9477	HGNC Symbol	MED20	protein_coding	7	5.5005	2.2109	5.2843	6.6425	5.9954e-06	0.00036936	4.1572
ADNP homeobox 2 [Source:HGNC Symbol;Acc:HGNC:23803]	ENSG00000101544	22850	HGNC Symbol	ADNP2	protein_coding	5	3.8713	-1.2577	3.7961	-6.6413	6.0086e-06	0.00036936	4.155
novel transcript	ENSG00000237372	NA	Clone-based (Ensembl) gene	AL606807.1	lincRNA	3	3.4621	6.4585	4.11	6.6259	6.1753e-06	0.00037699	4.128
endothelin converting enzyme 2 [Source:HGNC Symbol;Acc:HGNC:13275]	ENSG00000145194	9718	HGNC Symbol	ECE2	protein_coding	9	4.7305	3.5022	4.6818	6.6241	6.1956e-06	0.00037699	4.1247
immediate early response 2 [Source:HGNC Symbol;Acc:HGNC:28871]	ENSG00000160888	9592	HGNC Symbol	IER2	protein_coding	3	3.8508	-3.2268	4.0165	-6.6194	6.2479e-06	0.00037825	4.1164
thiosulfate sulfurtransferase [Source:HGNC Symbol;Acc:HGNC:12388]	ENSG00000128311	7263	HGNC Symbol	TST	protein_coding	4	2.2671	2.1832	1.8122	6.6019	6.4475e-06	0.00038316	4.0854
methionyl-tRNA synthetase 2, mitochondrial [Source:HGNC Symbol;Acc:HGNC:25133]	ENSG00000247626	92935	HGNC Symbol	MARS2	protein_coding	1	2.756	2.1756	2.8884	6.5986	6.4852e-06	0.00038316	4.0796
5'-aminolevulinate synthase 1 [Source:HGNC Symbol;Acc:HGNC:396]	ENSG00000023330	211	HGNC Symbol	ALAS1	protein_coding	6	6.9538	1.6617	6.9227	6.5983	6.4889e-06	0.00038316	4.079
translocase of inner mitochondrial membrane domain containing 1 [Source:HGNC Symbol;Acc:HGNC:1321]	ENSG00000113845	51300	HGNC Symbol	TIMMDC1	protein_coding	9	6.5997	1.5453	6.424	6.6074	6.3834e-06	0.00038316	4.0952
poly(A) binding protein cytoplasmic 1 [Source:HGNC Symbol;Acc:HGNC:8554]	ENSG00000070756	26986	HGNC Symbol	PABPC1	protein_coding	24	8.3946	-1.1832	8.4452	-6.6002	6.4668e-06	0.00038316	4.0824
coiled-coil-helix-coiled-coil-helix domain containing 4 [Source:HGNC Symbol;Acc:HGNC:26467]	ENSG00000163528	131474	HGNC Symbol	CHCHD4	protein_coding	3	4.3891	3.2864	4.1039	6.5866	6.6266e-06	0.00038938	4.0583
prolyl-tRNA synthetase 2, mitochondrial [Source:HGNC Symbol;Acc:HGNC:30563]	ENSG00000162396	25973	HGNC Symbol	PARS2	protein_coding	1	2.1584	3.2475	1.3743	6.5475	7.109e-06	0.00039885	3.9888
eukaryotic elongation factor 2 lysine methyltransferase [Source:HGNC Symbol;Acc:HGNC:32221]	ENSG00000118894	196483	HGNC Symbol	EEF2KMT	protein_coding	9	3.1416	2.7047	3.4995	6.5414	7.1871e-06	0.00039885	3.978
NADH:ubiquinone oxidoreductase complex assembly factor 1 [Source:HGNC Symbol;Acc:HGNC:18828]	ENSG00000137806	51103	HGNC Symbol	NDUFAF1	protein_coding	4	5.1485	2.4125	5.0454	6.5441	7.1519e-06	0.00039885	3.9829
prefoldin subunit 6 [Source:HGNC Symbol;Acc:HGNC:4926]	ENSG00000204220	10471	HGNC Symbol	PFDN6	protein_coding	7	3.0371	1.8448	3.0752	6.5538	7.0283e-06	0.00039885	4.0001
ERGIC and golgi 2 [Source:HGNC Symbol;Acc:HGNC:30208]	ENSG00000087502	51290	HGNC Symbol	ERGIC2	protein_coding	12	6.5811	1.5191	6.557	6.5449	7.1428e-06	0.00039885	3.9841
tryptophan rich basic protein [Source:HGNC Symbol;Acc:HGNC:12790]	ENSG00000182093	7485	HGNC Symbol	WRB	protein_coding	24	5.1245	1.1688	4.7754	6.5419	7.1812e-06	0.00039885	3.9788
RAB interacting factor [Source:HGNC Symbol;Acc:HGNC:9797]	ENSG00000183155	5877	HGNC Symbol	RABIF	protein_coding	1	5.1998	1.1091	5.1267	6.5554	7.0089e-06	0.00039885	4.0028
zinc finger protein 800 [Source:HGNC Symbol;Acc:HGNC:27267]	ENSG00000048405	168850	HGNC Symbol	ZNF800	protein_coding	8	4.5014	-1.4477	4.4822	-6.5508	7.0668e-06	0.00039885	3.9947
microtubule associated protein 1 light chain 3 beta [Source:HGNC Symbol;Acc:HGNC:13352]	ENSG00000140941	81631	HGNC Symbol	MAP1LC3B	protein_coding	6	5.2674	-1.8786	5.1395	-6.5443	7.1495e-06	0.00039885	3.9832
G protein-coupled receptor 183 [Source:HGNC Symbol;Acc:HGNC:3128]	ENSG00000169508	1880	HGNC Symbol	GPR183	protein_coding	1	6.832	-1.9092	6.2197	-6.5569	6.9892e-06	0.00039885	4.0056
terminal nucleotidyltransferase 4B [Source:HGNC Symbol;Acc:HGNC:30758]	ENSG00000121274	64282	HGNC Symbol	TENT4B	protein_coding	4	5.1612	-2.3245	4.9934	-6.5504	7.0719e-06	0.00039885	3.994
membrane spanning 4-domains A1 [Source:HGNC Symbol;Acc:HGNC:7315]	ENSG00000156738	931	HGNC Symbol	MS4A1	protein_coding	12	1.7243	-2.5176	1.0399	-6.55	7.0774e-06	0.00039885	3.9932
piggyBac transposable element derived 2 [Source:HGNC Symbol;Acc:HGNC:19399]	ENSG00000185220	267002	HGNC Symbol	PGBD2	protein_coding	3	5.032	2.2534	4.9143	6.5333	7.2925e-06	0.00040283	3.9636
cold inducible RNA binding protein [Source:HGNC Symbol;Acc:HGNC:1982]	ENSG00000099622	1153	HGNC Symbol	CIRBP	protein_coding	46	6.3088	-1.1699	6.5966	-6.5	7.7447e-06	0.00042585	3.9042
sulfide quinone oxidoreductase [Source:HGNC Symbol;Acc:HGNC:20390]	ENSG00000137767	58472	HGNC Symbol	SQOR	protein_coding	8	5.2904	1.4779	5.1864	6.4858	7.9456e-06	0.00043383	3.8789
PBX/knotted 1 homeobox 1 [Source:HGNC Symbol;Acc:HGNC:9022]	ENSG00000160199	5316	HGNC Symbol	PKNOX1	protein_coding	11	5.4315	1.2189	5.3148	6.4847	7.9622e-06	0.00043383	3.8768
ZFP36 ring finger protein [Source:NCBI gene;Acc:7538]	ENSG00000128016	7538	NCBI gene	ZFP36	protein_coding	5	3.4436	-4.9326	3.47	-6.482	8.0003e-06	0.00043394	3.8721
ILF3 divergent transcript [Source:HGNC Symbol;Acc:HGNC:27115]	ENSG00000267100	NA	HGNC Symbol	ILF3-DT	lincRNA	1	5.4067	-2.1304	5.5139	-6.4791	8.0423e-06	0.00043425	3.8669
tRNA methyltransferase 6 [Source:HGNC Symbol;Acc:HGNC:20900]	ENSG00000089195	51605	HGNC Symbol	TRMT6	protein_coding	5	4.6998	1.622	4.6366	6.452	8.4473e-06	0.00044474	3.8183
catechol-O-methyltransferase [Source:HGNC Symbol;Acc:HGNC:2228]	ENSG00000093010	1312	HGNC Symbol	COMT	protein_coding	11	4.8665	1.3654	4.9259	6.4488	8.4963e-06	0.00044474	3.8126
DnaJ heat shock protein family (Hsp40) member C18 [Source:HGNC Symbol;Acc:HGNC:28429]	ENSG00000170464	202052	HGNC Symbol	DNAJC18	protein_coding	12	4.0863	1.3582	3.7179	6.4491	8.4922e-06	0.00044474	3.8131
coenzyme Q9 [Source:HGNC Symbol;Acc:HGNC:25302]	ENSG00000088682	57017	HGNC Symbol	COQ9	protein_coding	16	4.8283	1.1109	4.6119	6.4563	8.3814e-06	0.00044474	3.8261
akirin 2 [Source:HGNC Symbol;Acc:HGNC:21407]	ENSG00000135334	55122	HGNC Symbol	AKIRIN2	protein_coding	2	3.4619	-1.0836	3.4804	-6.4497	8.4835e-06	0.00044474	3.8141
CASC3, exon junction complex subunit [Source:HGNC Symbol;Acc:HGNC:17040]	ENSG00000108349	22794	HGNC Symbol	CASC3	protein_coding	10	5.4198	-1.5209	5.3993	-6.4508	8.4656e-06	0.00044474	3.8162
glycerophosphocholine phosphodiesterase 1 [Source:HGNC Symbol;Acc:HGNC:26957]	ENSG00000125772	56261	HGNC Symbol	GPCPD1	protein_coding	7	5.0093	-2.3508	5.0012	-6.4547	8.4066e-06	0.00044474	3.8231
cytochrome c oxidase copper chaperone COX17 [Source:HGNC Symbol;Acc:HGNC:2264]	ENSG00000138495	10063	HGNC Symbol	COX17	protein_coding	7	7.1466	2.003	7.3744	6.4384	8.6591e-06	0.00044934	3.7938
transmembrane protein 69 [Source:HGNC Symbol;Acc:HGNC:28035]	ENSG00000159596	51249	HGNC Symbol	TMEM69	protein_coding	2	4.8068	1.4962	4.638	6.4393	8.6441e-06	0.00044934	3.7955
GTP binding protein 1 [Source:HGNC Symbol;Acc:HGNC:4669]	ENSG00000100226	9567	HGNC Symbol	GTPBP1	protein_coding	13	3.1941	-1.5837	3.2268	-6.4304	8.7844e-06	0.00045387	3.7796
chromosome 6 open reading frame 48 [Source:HGNC Symbol;Acc:HGNC:19078]	ENSG00000204387	50854	HGNC Symbol	C6orf48	protein_coding	11	5.4565	-1.2693	5.4832	-6.4263	8.8511e-06	0.00045536	3.7721
lin-52 DREAM MuvB core complex component [Source:HGNC Symbol;Acc:HGNC:19856]	ENSG00000205659	91750	HGNC Symbol	LIN52	protein_coding	5	5.9105	1.4341	5.7765	6.4172	8.9981e-06	0.00046094	3.7558
LEO1 homolog, Paf1/RNA polymerase II complex component [Source:HGNC Symbol;Acc:HGNC:30401]	ENSG00000166477	123169	HGNC Symbol	LEO1	protein_coding	3	6.6726	1.1062	6.5497	6.4147	9.0403e-06	0.00046113	3.7512
family with sequence similarity 172 member A [Source:HGNC Symbol;Acc:HGNC:25365]	ENSG00000113391	83989	HGNC Symbol	FAM172A	protein_coding	9	4.0031	-1.568	3.9161	-6.4081	9.1481e-06	0.00046465	3.7395
small integral membrane protein 12 [Source:HGNC Symbol;Acc:HGNC:25154]	ENSG00000163866	113444	HGNC Symbol	SMIM12	protein_coding	6	5.8694	1.1067	5.6501	6.4045	9.2084e-06	0.00046566	3.733
SDE2 telomere maintenance homolog [Source:HGNC Symbol;Acc:HGNC:26643]	ENSG00000143751	163859	HGNC Symbol	SDE2	protein_coding	1	4.7846	-1.6957	4.7723	-6.4023	9.2456e-06	0.00046566	3.729
signal transducing adaptor family member 2 [Source:HGNC Symbol;Acc:HGNC:30430]	ENSG00000178078	55620	HGNC Symbol	STAP2	protein_coding	10	1.5456	1.9119	1.2813	6.3951	9.368e-06	0.00046985	3.716
GINS complex subunit 3 [Source:HGNC Symbol;Acc:HGNC:25851]	ENSG00000181938	64785	HGNC Symbol	GINS3	protein_coding	10	4.121	1.9595	3.7281	6.3791	9.6445e-06	0.0004817	3.6872
twinkle mtDNA helicase [Source:HGNC Symbol;Acc:HGNC:1160]	ENSG00000107815	56652	HGNC Symbol	TWNK	protein_coding	9	3.1103	3.17	2.9849	6.3651	9.894e-06	0.00048606	3.662
pseudouridine synthase 1 [Source:HGNC Symbol;Acc:HGNC:15508]	ENSG00000177192	80324	HGNC Symbol	PUS1	protein_coding	11	2.7427	1.4815	2.4571	6.3653	9.8903e-06	0.00048606	3.6623
leupaxin [Source:HGNC Symbol;Acc:HGNC:14061]	ENSG00000110031	9404	HGNC Symbol	LPXN	protein_coding	5	8.3251	1.3797	8.2932	6.3715	9.7786e-06	0.00048606	3.6736
transmembrane protein 18 [Source:HGNC Symbol;Acc:HGNC:25257]	ENSG00000151353	129787	HGNC Symbol	TMEM18	protein_coding	8	5.9552	1.2609	5.9283	6.3665	9.8685e-06	0.00048606	3.6645
apolipoprotein O [Source:HGNC Symbol;Acc:HGNC:28727]	ENSG00000184831	79135	HGNC Symbol	APOO	protein_coding	9	4.4872	1.5923	4.5219	6.356	1.0059e-05	0.00049216	3.6456
peroxiredoxin 4 [Source:HGNC Symbol;Acc:HGNC:17169]	ENSG00000123131	10549	HGNC Symbol	PRDX4	protein_coding	5	4.986	2.2803	5.1156	6.3514	1.0145e-05	0.00049436	3.6371
ring finger protein 10 [Source:HGNC Symbol;Acc:HGNC:10055]	ENSG00000022840	9921	HGNC Symbol	RNF10	protein_coding	25	5.9064	-1.4032	5.8728	-6.3463	1.024e-05	0.00049693	3.628
pentatricopeptide repeat domain 1 [Source:HGNC Symbol;Acc:HGNC:22198]	ENSG00000106246	26024	HGNC Symbol	PTCD1	protein_coding	5	2.506	-2.7514	2.2875	-6.3423	1.0315e-05	0.00049855	3.6208
mitochondrial ribosomal protein S14 [Source:HGNC Symbol;Acc:HGNC:14049]	ENSG00000120333	63931	HGNC Symbol	MRPS14	protein_coding	3	6.3603	1.1058	6.2317	6.3391	1.0375e-05	0.00049947	3.615
EEF1A lysine methyltransferase 1 [Source:HGNC Symbol;Acc:HGNC:27351]	ENSG00000150456	221143	HGNC Symbol	EEF1AKMT1	protein_coding	3	4.3413	2.377	4.3	6.3314	1.0524e-05	0.00050058	3.6009
VHL binding protein 1 [Source:HGNC Symbol;Acc:HGNC:12662]	ENSG00000155959	7411	HGNC Symbol	VBP1	protein_coding	4	6.7399	1.3268	6.7385	6.335	1.0454e-05	0.00050058	3.6075
transmembrane protein 183A [Source:HGNC Symbol;Acc:HGNC:20173]	ENSG00000163444	92703	HGNC Symbol	TMEM183A	protein_coding	5	4.5048	-1.3802	4.2713	-6.3317	1.0518e-05	0.00050058	3.6015
GPN-loop GTPase 3 [Source:HGNC Symbol;Acc:HGNC:30186]	ENSG00000111231	51184	HGNC Symbol	GPN3	protein_coding	10	5.3341	1.6647	5.311	6.3234	1.0677e-05	0.00050462	3.5866
heterogeneous nuclear ribonucleoprotein L [Source:HGNC Symbol;Acc:HGNC:5045]	ENSG00000104824	3191	HGNC Symbol	HNRNPL	protein_coding	15	4.645	-1.5193	4.5239	-6.3226	1.0693e-05	0.00050462	3.5851
mitochondrial ribosomal protein L35 [Source:HGNC Symbol;Acc:HGNC:14489]	ENSG00000132313	51318	HGNC Symbol	MRPL35	protein_coding	4	5.0439	1.6043	4.7382	6.3173	1.0799e-05	0.00050563	3.5754
N-acetylglucosamine kinase [Source:HGNC Symbol;Acc:HGNC:17174]	ENSG00000124357	55577	HGNC Symbol	NAGK	protein_coding	29	6.076	1.0979	6.0957	6.3182	1.078e-05	0.00050563	3.5771
gem nuclear organelle associated protein 6 [Source:HGNC Symbol;Acc:HGNC:20044]	ENSG00000152147	79833	HGNC Symbol	GEMIN6	protein_coding	3	4.9843	1.8031	4.6059	6.3076	1.0992e-05	0.00051071	3.5578
transmembrane protein 64 [Source:HGNC Symbol;Acc:HGNC:25441]	ENSG00000180694	169200	HGNC Symbol	TMEM64	protein_coding	7	4.4275	1.4804	4.6385	6.3079	1.0984e-05	0.00051071	3.5585
MIR3142 host gene [Source:HGNC Symbol;Acc:HGNC:51944]	ENSG00000253522	NA	HGNC Symbol	MIR3142HG	lincRNA	2	3.8722	4.7244	3.3226	6.3051	1.1042e-05	0.00051103	3.5534
heparan sulfate-glucosamine 3-sulfotransferase 3B1 [Source:HGNC Symbol;Acc:HGNC:5198]	ENSG00000125430	9953	HGNC Symbol	HS3ST3B1	protein_coding	2	6.2719	2.9191	5.6344	6.2868	1.1418e-05	0.00052442	3.5202
APAF1 interacting protein [Source:HGNC Symbol;Acc:HGNC:17581]	ENSG00000149089	51074	HGNC Symbol	APIP	protein_coding	3	5.2032	1.2796	4.8733	6.287	1.1416e-05	0.00052442	3.5204
translocase of outer mitochondrial membrane 34 [Source:HGNC Symbol;Acc:HGNC:15746]	ENSG00000025772	10953	HGNC Symbol	TOMM34	protein_coding	1	4.8545	1.4305	4.8839	6.2785	1.1595e-05	0.00052848	3.505
pyruvate dehydrogenase E1 alpha 1 subunit [Source:HGNC Symbol;Acc:HGNC:8806]	ENSG00000131828	5160	HGNC Symbol	PDHA1	protein_coding	13	7.3843	1.3423	7.5392	6.2787	1.1591e-05	0.00052848	3.5053
Fos proto-oncogene, AP-1 transcription factor subunit [Source:HGNC Symbol;Acc:HGNC:3796]	ENSG00000170345	2353	HGNC Symbol	FOS	protein_coding	10	5.2306	-2.9061	7.4707	-6.2693	1.1793e-05	0.00053546	3.4882
phosphatidylinositol glycan anchor biosynthesis class W [Source:HGNC Symbol;Acc:HGNC:23213]	ENSG00000277161	284098	HGNC Symbol	PIGW	protein_coding	3	3.3717	2.4803	3.1671	6.2497	1.2225e-05	0.00055301	3.4526
C-C motif chemokine receptor 1 [Source:HGNC Symbol;Acc:HGNC:1602]	ENSG00000163823	1230	HGNC Symbol	CCR1	protein_coding	1	6.8005	5.4296	6.6865	6.2327	1.2614e-05	0.00056753	3.4216
C-C motif chemokine receptor 7 [Source:HGNC Symbol;Acc:HGNC:1608]	ENSG00000126353	1236	HGNC Symbol	CCR7	protein_coding	3	6.5331	3.8529	7.0712	6.2312	1.2648e-05	0.00056753	3.4189
dolichyl-phosphate N-acetylglucosaminephosphotransferase 1 [Source:HGNC Symbol;Acc:HGNC:2995]	ENSG00000172269	1798	HGNC Symbol	DPAGT1	protein_coding	19	6.6044	1.6757	6.8596	6.2282	1.2719e-05	0.00056753	3.4134
WD repeat domain 46 [Source:HGNC Symbol;Acc:HGNC:13923]	ENSG00000227057	9277	HGNC Symbol	WDR46	protein_coding	9	5.3785	1.5927	5.7956	6.2275	1.2736e-05	0.00056753	3.4121
cytidine and dCMP deaminase domain containing 1 [Source:HGNC Symbol;Acc:HGNC:20299]	ENSG00000102543	81602	HGNC Symbol	CDADC1	protein_coding	6	4.2435	-1.5451	4.108	-6.224	1.2819e-05	0.00056911	3.4056
myosin heavy chain 10 [Source:HGNC Symbol;Acc:HGNC:7568]	ENSG00000133026	4628	HGNC Symbol	MYH10	protein_coding	11	2.9586	-1.9368	2.5669	-6.2091	1.3174e-05	0.00058272	3.3786
NOP16 nucleolar protein [Source:HGNC Symbol;Acc:HGNC:26934]	ENSG00000048162	51491	HGNC Symbol	NOP16	protein_coding	11	5.6441	3.8004	5.9176	6.1834	1.3816e-05	0.00060786	3.3315
LSM6 homolog, U6 small nuclear RNA and mRNA degradation associated [Source:HGNC Symbol;Acc:HGNC:17017]	ENSG00000164167	11157	HGNC Symbol	LSM6	protein_coding	8	5.6795	1.4257	5.6787	6.1823	1.3844e-05	0.00060786	3.3295
chromosome 1 open reading frame 174 [Source:HGNC Symbol;Acc:HGNC:27915]	ENSG00000198912	339448	HGNC Symbol	C1orf174	protein_coding	3	6.6816	-1.3022	6.7296	-6.1798	1.3908e-05	0.00060843	3.3249
Rho GTPase activating protein 31 [Source:HGNC Symbol;Acc:HGNC:29216]	ENSG00000031081	57514	HGNC Symbol	ARHGAP31	protein_coding	2	3.3023	2.5238	3.4343	6.1723	1.4103e-05	0.00061473	3.3111
CD58 molecule [Source:HGNC Symbol;Acc:HGNC:1688]	ENSG00000116815	965	HGNC Symbol	CD58	protein_coding	5	5.4993	1.4554	5.6431	6.1681	1.4213e-05	0.00061728	3.3034
aspartyl-tRNA synthetase 2, mitochondrial [Source:HGNC Symbol;Acc:HGNC:25538]	ENSG00000117593	55157	HGNC Symbol	DARS2	protein_coding	14	4.7566	1.9011	4.5752	6.1615	1.4387e-05	0.00062261	3.2914
calcium and integrin binding 1 [Source:HGNC Symbol;Acc:HGNC:16920]	ENSG00000185043	10519	HGNC Symbol	CIB1	protein_coding	3	5.3437	-1.2221	5.4157	-6.1184	1.5585e-05	0.00067202	3.2122
ADP ribosylation factor like GTPase 1 [Source:HGNC Symbol;Acc:HGNC:692]	ENSG00000120805	400	HGNC Symbol	ARL1	protein_coding	11	6.3961	2.0226	6.4982	6.1094	1.5849e-05	0.0006761	3.1955
mitochondrial ribosomal protein L27 [Source:HGNC Symbol;Acc:HGNC:14483]	ENSG00000108826	51264	HGNC Symbol	MRPL27	protein_coding	7	6.774	1.4436	6.5424	6.1096	1.5842e-05	0.0006761	3.196
MIS18 kinetochore protein A [Source:HGNC Symbol;Acc:HGNC:1286]	ENSG00000159055	54069	HGNC Symbol	MIS18A	protein_coding	2	3.3415	1.2011	3.0226	6.1121	1.5769e-05	0.0006761	3.2006
proteasome subunit beta 5 [Source:HGNC Symbol;Acc:HGNC:9542]	ENSG00000100804	5693	HGNC Symbol	PSMB5	protein_coding	6	7.1355	2.8496	7.131	6.1033	1.6031e-05	0.00068142	3.1843
oligosaccharyltransferase complex non-catalytic subunit [Source:HGNC Symbol;Acc:HGNC:24448]	ENSG00000198856	58505	HGNC Symbol	OSTC	protein_coding	5	8.1839	2.2196	8.3548	6.0991	1.6157e-05	0.00068195	3.1765
ADP ribosylation factor like GTPase 5B [Source:HGNC Symbol;Acc:HGNC:23052]	ENSG00000165997	221079	HGNC Symbol	ARL5B	protein_coding	1	2.9376	-1.6279	2.9314	-6.1008	1.6105e-05	0.00068195	3.1797
peptidylprolyl isomerase D [Source:HGNC Symbol;Acc:HGNC:9257]	ENSG00000171497	5481	HGNC Symbol	PPID	protein_coding	3	5.9452	1.0596	6.0676	6.0611	1.7342e-05	0.00072942	3.1063
coatomer protein complex subunit beta 2 [Source:HGNC Symbol;Acc:HGNC:2232]	ENSG00000184432	9276	HGNC Symbol	COPB2	protein_coding	13	7.7801	2.3011	7.6533	6.055	1.7539e-05	0.00073512	3.0952
N-myc and STAT interactor [Source:HGNC Symbol;Acc:HGNC:7854]	ENSG00000123609	9111	HGNC Symbol	NMI	protein_coding	4	6.0415	1.2952	5.9061	6.0526	1.762e-05	0.00073591	3.0906
UFM1 specific peptidase 2 [Source:HGNC Symbol;Acc:HGNC:25640]	ENSG00000109775	55325	HGNC Symbol	UFSP2	protein_coding	9	5.2815	1.1601	5.2657	6.0377	1.8115e-05	0.00075398	3.0632
transducin beta like 3 [Source:HGNC Symbol;Acc:HGNC:11587]	ENSG00000183751	10607	HGNC Symbol	TBL3	protein_coding	8	2.8192	1.2193	2.9346	6.0356	1.8189e-05	0.00075441	3.0592
nucleoporin like 2 [Source:HGNC Symbol;Acc:HGNC:17010]	ENSG00000136243	11097	HGNC Symbol	NUPL2	protein_coding	12	6.1857	1.3298	6.0875	6.0329	1.8278e-05	0.00075553	3.0543
myocyte enhancer factor 2D [Source:HGNC Symbol;Acc:HGNC:6997]	ENSG00000116604	4209	HGNC Symbol	MEF2D	protein_coding	7	3.0978	-1.6932	2.9594	-6.0268	1.849e-05	0.00076163	3.0429
interleukin 2 receptor subunit alpha [Source:HGNC Symbol;Acc:HGNC:6008]	ENSG00000134460	3559	HGNC Symbol	IL2RA	protein_coding	6	6.9307	7.9017	7.6298	6.0248	1.8559e-05	0.00076185	3.0392
talin rod domain containing 1 [Source:HGNC Symbol;Acc:HGNC:13519]	ENSG00000140406	59274	HGNC Symbol	TLNRD1	protein_coding	1	2.5204	1.4374	2.6171	6.0125	1.899e-05	0.00077493	3.0165
ribosomal RNA processing 1 [Source:HGNC Symbol;Acc:HGNC:18785]	ENSG00000160214	8568	HGNC Symbol	RRP1	protein_coding	7	2.7975	1.1417	2.4746	6.0121	1.9006e-05	0.00077493	3.0156
NDC1 transmembrane nucleoporin [Source:HGNC Symbol;Acc:HGNC:25525]	ENSG00000058804	55706	HGNC Symbol	NDC1	protein_coding	2	4.7266	1.577	4.5479	6.0096	1.9094e-05	0.00077586	3.011
UTP11, small subunit processome component [Source:HGNC Symbol;Acc:HGNC:24329]	ENSG00000183520	51118	HGNC Symbol	UTP11	protein_coding	4	6.8383	1.9878	6.9107	5.9545	2.1176e-05	0.00085284	2.9085
branched chain amino acid transaminase 2 [Source:HGNC Symbol;Acc:HGNC:977]	ENSG00000105552	587	HGNC Symbol	BCAT2	protein_coding	12	4.3327	1.2475	4.1577	5.9555	2.1138e-05	0.00085284	2.9103
cornichon family AMPA receptor auxiliary protein 4 [Source:HGNC Symbol;Acc:HGNC:25013]	ENSG00000143771	29097	HGNC Symbol	CNIH4	protein_coding	8	6.6806	1.2423	6.4771	5.9539	2.1202e-05	0.00085284	2.9073
3-hydroxyacyl-CoA dehydratase 3 [Source:HGNC Symbol;Acc:HGNC:24175]	ENSG00000074696	51495	HGNC Symbol	HACD3	protein_coding	12	5.9951	1.2835	6.0276	5.9468	2.1484e-05	0.0008613	2.8942
RNA polymerase III subunit K [Source:HGNC Symbol;Acc:HGNC:14121]	ENSG00000161980	51728	HGNC Symbol	POLR3K	protein_coding	2	6.1133	2.2866	6.1019	5.9368	2.1893e-05	0.00087478	2.8755
phosphomevalonate kinase [Source:HGNC Symbol;Acc:HGNC:9141]	ENSG00000163344	10654	HGNC Symbol	PMVK	protein_coding	1	4	1.3759	3.8759	5.9295	2.2197e-05	0.00088314	2.8618
novel transcript	ENSG00000260517	NA	Clone-based (Ensembl) gene	AC009093.2	lincRNA	2	2.592	-3.1084	2.2664	-5.9282	2.225e-05	0.00088314	2.8595
kinetochore localized astrin (SPAG5) binding protein [Source:HGNC Symbol;Acc:HGNC:30767]	ENSG00000128944	90417	HGNC Symbol	KNSTRN	protein_coding	16	4.4725	1.5248	3.7763	5.9251	2.2381e-05	0.00088542	2.8536
novel protein	ENSG00000258881	NA	Clone-based (Ensembl) gene	AC007040.2	protein_coding	2	3.0537	2.2296	2.6758	5.9195	2.2617e-05	0.00089182	2.8432
alanyl-tRNA synthetase [Source:HGNC Symbol;Acc:HGNC:20]	ENSG00000090861	16	HGNC Symbol	AARS	protein_coding	7	6.6856	2.695	6.6922	5.915	2.2811e-05	0.00089494	2.8348
mitochondrial ribosomal protein L20 [Source:HGNC Symbol;Acc:HGNC:14478]	ENSG00000242485	55052	HGNC Symbol	MRPL20	protein_coding	6	6.6835	1.5663	6.7814	5.9142	2.2846e-05	0.00089494	2.8333
interleukin 18 binding protein [Source:HGNC Symbol;Acc:HGNC:5987]	ENSG00000137496	10068	HGNC Symbol	IL18BP	protein_coding	14	2.8357	-2.3136	3.1841	-5.9124	2.2923e-05	0.00089502	2.8299
transaldolase 1 [Source:HGNC Symbol;Acc:HGNC:11559]	ENSG00000177156	6888	HGNC Symbol	TALDO1	protein_coding	9	7.6092	1.4951	7.5639	5.9044	2.3273e-05	0.00089947	2.8149
TATA-box binding protein associated factor, RNA polymerase I subunit A [Source:HGNC Symbol;Acc:HGNC:11532]	ENSG00000143498	9015	HGNC Symbol	TAF1A	protein_coding	7	3.7761	1.4717	3.6123	5.9034	2.3318e-05	0.00089947	2.813
LYN proto-oncogene, Src family tyrosine kinase [Source:HGNC Symbol;Acc:HGNC:6735]	ENSG00000254087	4067	HGNC Symbol	LYN	protein_coding	4	5.6441	-1.1791	5.7977	-5.9029	2.3336e-05	0.00089947	2.8122
C-C motif chemokine ligand 28 [Source:HGNC Symbol;Acc:HGNC:17700]	ENSG00000151882	56477	HGNC Symbol	CCL28	protein_coding	4	4.2298	-2.2723	4.1682	-5.9075	2.3137e-05	0.00089947	2.8207
tectonic family member 3 [Source:HGNC Symbol;Acc:HGNC:24519]	ENSG00000119977	26123	HGNC Symbol	TCTN3	protein_coding	7	6.3796	1.6296	6.6123	5.8988	2.3521e-05	0.00090368	2.8044
phosphatidylinositol glycan anchor biosynthesis class U [Source:HGNC Symbol;Acc:HGNC:15791]	ENSG00000101464	128869	HGNC Symbol	PIGU	protein_coding	6	4.1275	1.2351	4.1722	5.896	2.3643e-05	0.00090405	2.7993
solute carrier family 9 member A8 [Source:HGNC Symbol;Acc:HGNC:20728]	ENSG00000197818	23315	HGNC Symbol	SLC9A8	protein_coding	4	3.4627	-1.1847	3.4061	-5.8952	2.3682e-05	0.00090405	2.7977
3'(2'), 5'-bisphosphate nucleotidase 1 [Source:HGNC Symbol;Acc:HGNC:1096]	ENSG00000162813	10380	HGNC Symbol	BPNT1	protein_coding	11	5.4905	1.2266	5.2637	5.8812	2.4317e-05	0.00092535	2.7714
protein prenyltransferase alpha subunit repeat containing 1 [Source:HGNC Symbol;Acc:HGNC:30449]	ENSG00000188647	375743	HGNC Symbol	PTAR1	protein_coding	6	4.5412	-1.7346	4.5751	-5.8782	2.4454e-05	0.00092763	2.7658
phosphatidylinositol glycan anchor biosynthesis class M [Source:HGNC Symbol;Acc:HGNC:18858]	ENSG00000143315	93183	HGNC Symbol	PIGM	protein_coding	1	4.6779	1.485	4.2885	5.8743	2.4634e-05	0.00093149	2.7586
solute carrier family 5 member 3 [Source:HGNC Symbol;Acc:HGNC:11038]	ENSG00000198743	6526	HGNC Symbol	SLC5A3	protein_coding	1	5.6635	1.9428	5.4656	5.8704	2.4819e-05	0.00093556	2.7511
small ArfGAP2 [Source:HGNC Symbol;Acc:HGNC:25082]	ENSG00000084070	64744	HGNC Symbol	SMAP2	protein_coding	6	6.962	1.27	7.0076	5.8567	2.5472e-05	0.00095416	2.7254
ring finger protein 121 [Source:HGNC Symbol;Acc:HGNC:21070]	ENSG00000137522	55298	HGNC Symbol	RNF121	protein_coding	14	4.1812	1.1598	4.1112	5.858	2.5406e-05	0.00095416	2.728
ring-box 1 [Source:HGNC Symbol;Acc:HGNC:9928]	ENSG00000100387	9978	HGNC Symbol	RBX1	protein_coding	3	7.7773	1.2465	7.4912	5.8472	2.5931e-05	0.00096832	2.7077
beta-1,3-galactosyltransferase 6 [Source:HGNC Symbol;Acc:HGNC:17978]	ENSG00000176022	126792	HGNC Symbol	B3GALT6	protein_coding	2	1.8346	2.072	1.858	5.8416	2.6209e-05	0.00097568	2.6971
HtrA serine peptidase 2 [Source:HGNC Symbol;Acc:HGNC:14348]	ENSG00000115317	27429	HGNC Symbol	HTRA2	protein_coding	10	3.9957	1.1428	4.0577	5.8384	2.6368e-05	0.00097854	2.6912
transmembrane protein 205 [Source:HGNC Symbol;Acc:HGNC:29631]	ENSG00000105518	374882	HGNC Symbol	TMEM205	protein_coding	16	3.3068	1.2713	3.6364	5.8366	2.6461e-05	0.00097896	2.6877
RecQ mediated genome instability 2 [Source:HGNC Symbol;Acc:HGNC:28349]	ENSG00000175643	116028	HGNC Symbol	RMI2	protein_coding	7	1.7687	2.4208	1.04	5.8337	2.6607e-05	0.0009807	2.6822
transmembrane protein 35B [Source:HGNC Symbol;Acc:HGNC:40021]	ENSG00000243749	100506144	HGNC Symbol	TMEM35B	protein_coding	1	3.1164	2.3238	2.908	5.8292	2.6835e-05	0.0009807	2.6737
golgi phosphoprotein 3 like [Source:HGNC Symbol;Acc:HGNC:24882]	ENSG00000143457	55204	HGNC Symbol	GOLPH3L	protein_coding	3	4.776	1.7462	4.2209	5.8318	2.6699e-05	0.0009807	2.6788
ubiquitin specific peptidase 42 [Source:HGNC Symbol;Acc:HGNC:20068]	ENSG00000106346	84132	HGNC Symbol	USP42	protein_coding	7	3.5275	-1.4736	3.298	-5.8308	2.6753e-05	0.0009807	2.6768
YOD1 deubiquitinase [Source:HGNC Symbol;Acc:HGNC:25035]	ENSG00000180667	55432	HGNC Symbol	YOD1	protein_coding	2	2.9171	-1.5054	2.538	-5.8195	2.7334e-05	0.00099589	2.6555
junction mediating and regulatory protein, p53 cofactor [Source:HGNC Symbol;Acc:HGNC:28916]	ENSG00000152409	133746	HGNC Symbol	JMY	protein_coding	2	3.4388	-2.2855	3.1032	-5.801	2.8308e-05	0.0010283	2.6208
LFNG O-fucosylpeptide 3-beta-N-acetylglucosaminyltransferase [Source:HGNC Symbol;Acc:HGNC:6560]	ENSG00000106003	3955	HGNC Symbol	LFNG	protein_coding	7	2.881	1.984	2.9499	5.794	2.8688e-05	0.0010337	2.6076
transmembrane protein 208 [Source:HGNC Symbol;Acc:HGNC:25015]	ENSG00000168701	29100	HGNC Symbol	TMEM208	protein_coding	12	6.862	1.7667	7.0718	5.7938	2.8699e-05	0.0010337	2.6072
zinc finger and BTB domain containing 21 [Source:HGNC Symbol;Acc:HGNC:13083]	ENSG00000173276	49854	HGNC Symbol	ZBTB21	protein_coding	8	3.4641	-1.5942	3.5245	-5.7935	2.8717e-05	0.0010337	2.6066
high mobility group box 2 [Source:HGNC Symbol;Acc:HGNC:5000]	ENSG00000164104	3148	HGNC Symbol	HMGB2	protein_coding	5	8.8516	-1.505	7.9304	-5.7834	2.9273e-05	0.0010506	2.5875
tRNA methyltransferase subunit 11-2 [Source:HGNC Symbol;Acc:HGNC:26940]	ENSG00000173113	51504	HGNC Symbol	TRMT112	protein_coding	6	7.3608	1.1239	7.336	5.7762	2.9676e-05	0.0010587	2.574
family with sequence similarity 76 member B [Source:HGNC Symbol;Acc:HGNC:28492]	ENSG00000077458	143684	HGNC Symbol	FAM76B	protein_coding	13	4.4869	-1.6918	4.1967	-5.7764	2.9667e-05	0.0010587	2.5743
nucleoporin 62 [Source:HGNC Symbol;Acc:HGNC:8066]	ENSG00000213024	23636	HGNC Symbol	NUP62	protein_coding	23	5.6543	1.1695	5.7001	5.7747	2.9766e-05	0.0010588	2.571
LSM10, U7 small nuclear RNA associated [Source:HGNC Symbol;Acc:HGNC:17562]	ENSG00000181817	84967	HGNC Symbol	LSM10	protein_coding	3	5.7849	1.0587	5.7651	5.7713	2.9956e-05	0.0010624	2.5647
RAB10, member RAS oncogene family [Source:HGNC Symbol;Acc:HGNC:9759]	ENSG00000084733	10890	HGNC Symbol	RAB10	protein_coding	4	5.0725	1.676	5.0105	5.7606	3.0573e-05	0.001081	2.5445
fibronectin type III domain containing 3A [Source:HGNC Symbol;Acc:HGNC:20296]	ENSG00000102531	22862	HGNC Symbol	FNDC3A	protein_coding	6	4.529	-1.2394	4.5553	-5.748	3.1318e-05	0.0011041	2.5206
aldo-keto reductase family 1 member A1 [Source:HGNC Symbol;Acc:HGNC:380]	ENSG00000117448	10327	HGNC Symbol	AKR1A1	protein_coding	14	7.6262	1.2998	7.8824	5.7416	3.17e-05	0.0011111	2.5086
programmed cell death 10 [Source:HGNC Symbol;Acc:HGNC:8761]	ENSG00000114209	11235	HGNC Symbol	PDCD10	protein_coding	18	7.7128	1.1209	7.5056	5.7419	3.1682e-05	0.0011111	2.5091
chromosome 1 open reading frame 216 [Source:HGNC Symbol;Acc:HGNC:26800]	ENSG00000142686	127703	HGNC Symbol	C1orf216	protein_coding	3	3.1575	1.3897	3.1168	5.7391	3.1857e-05	0.0011133	2.5037
regulation of nuclear pre-mRNA domain containing 1A [Source:HGNC Symbol;Acc:HGNC:25560]	ENSG00000141425	55197	HGNC Symbol	RPRD1A	protein_coding	11	4.2983	-1.7437	4.1461	-5.7257	3.2684e-05	0.0011389	2.4783
eukaryotic translation initiation factor 2 subunit alpha [Source:HGNC Symbol;Acc:HGNC:3265]	ENSG00000134001	1965	HGNC Symbol	EIF2S1	protein_coding	6	8.383	2.3286	8.5625	5.7209	3.2982e-05	0.0011453	2.4693
methyltransferase like 2A [Source:HGNC Symbol;Acc:HGNC:25755]	ENSG00000087995	339175	HGNC Symbol	METTL2A	protein_coding	4	4.9421	1.3464	4.8666	5.7197	3.3058e-05	0.0011453	2.467
eukaryotic translation elongation factor 1 epsilon 1 [Source:HGNC Symbol;Acc:HGNC:3212]	ENSG00000124802	9521	HGNC Symbol	EEF1E1	protein_coding	6	4.6603	2.2662	4.7293	5.7131	3.3476e-05	0.0011564	2.4545
neurochondrin [Source:HGNC Symbol;Acc:HGNC:17597]	ENSG00000020129	23154	HGNC Symbol	NCDN	protein_coding	6	2.6768	1.5897	2.7252	5.703	3.4133e-05	0.001169	2.4353
ceramide synthase 2 [Source:HGNC Symbol;Acc:HGNC:14076]	ENSG00000143418	29956	HGNC Symbol	CERS2	protein_coding	14	5.5632	1.035	5.7721	5.7033	3.4114e-05	0.001169	2.4358
TGFB induced factor homeobox 2 [Source:HGNC Symbol;Acc:HGNC:15764]	ENSG00000118707	60436	HGNC Symbol	TGIF2	protein_coding	9	5.3194	0.94378	5.0918	5.705	3.4001e-05	0.001169	2.4391
N-acetylneuraminate synthase [Source:HGNC Symbol;Acc:HGNC:19237]	ENSG00000095380	54187	HGNC Symbol	NANS	protein_coding	6	5.2678	1.505	5.3357	5.687	3.5194e-05	0.0012019	2.4049
tRNA nucleotidyl transferase 1 [Source:HGNC Symbol;Acc:HGNC:17341]	ENSG00000072756	51095	HGNC Symbol	TRNT1	protein_coding	20	5.3729	1.2311	5.2609	5.6851	3.5325e-05	0.0012029	2.4012
aspartyl-tRNA synthetase [Source:HGNC Symbol;Acc:HGNC:2678]	ENSG00000115866	1615	HGNC Symbol	DARS	protein_coding	11	6.8904	1.4729	6.8606	5.6833	3.5445e-05	0.0012036	2.3978
chromodomain helicase DNA binding protein 1 [Source:HGNC Symbol;Acc:HGNC:1915]	ENSG00000153922	1105	HGNC Symbol	CHD1	protein_coding	12	5.9623	-1.7325	6.0759	-5.68	3.5673e-05	0.0012079	2.3915
spermidine/spermine N1-acetyltransferase 1 [Source:HGNC Symbol;Acc:HGNC:10540]	ENSG00000130066	6303	HGNC Symbol	SAT1	protein_coding	9	8.604	-2.1681	8.7915	-5.6773	3.5854e-05	0.0012106	2.3865
solute carrier family 41 member 2 [Source:HGNC Symbol;Acc:HGNC:31045]	ENSG00000136052	84102	HGNC Symbol	SLC41A2	protein_coding	10	3.1161	2.1424	2.9719	5.6737	3.6105e-05	0.0012157	2.3796
methyltransferase like 2B [Source:HGNC Symbol;Acc:HGNC:18272]	ENSG00000165055	55798	HGNC Symbol	METTL2B	protein_coding	7	5.3914	1.0901	5.3013	5.6685	3.6468e-05	0.0012211	2.3696
cofilin 2 [Source:HGNC Symbol;Acc:HGNC:1875]	ENSG00000165410	1073	HGNC Symbol	CFL2	protein_coding	6	4.7823	-1.7895	4.4512	-5.6697	3.6381e-05	0.0012211	2.372
LSM2 homolog, U6 small nuclear RNA and mRNA degradation associated [Source:HGNC Symbol;Acc:HGNC:13940]	ENSG00000204392	57819	HGNC Symbol	LSM2	protein_coding	7	6.3941	1.9653	6.5769	5.6666	3.6598e-05	0.001222	2.3661
heat shock factor binding protein 1 [Source:HGNC Symbol;Acc:HGNC:5203]	ENSG00000230989	3281	HGNC Symbol	HSBP1	protein_coding	4	7.193	1.2122	7.0465	5.659	3.7135e-05	0.0012331	2.3517
PYM homolog 1, exon junction complex associated factor [Source:HGNC Symbol;Acc:HGNC:30258]	ENSG00000170473	84305	HGNC Symbol	PYM1	protein_coding	7	5.0708	1.166	4.777	5.6601	3.7056e-05	0.0012331	2.3538
phenylalanyl-tRNA synthetase subunit alpha [Source:HGNC Symbol;Acc:HGNC:3592]	ENSG00000179115	2193	HGNC Symbol	FARSA	protein_coding	10	5.0657	2.0397	5.0442	5.6498	3.78e-05	0.0012464	2.3341
LSM5 homolog, U6 small nuclear RNA and mRNA degradation associated [Source:HGNC Symbol;Acc:HGNC:17162]	ENSG00000106355	23658	HGNC Symbol	LSM5	protein_coding	10	6.8784	1.6057	6.7062	5.6517	3.7664e-05	0.0012464	2.3376
F-box protein 33 [Source:HGNC Symbol;Acc:HGNC:19833]	ENSG00000165355	254170	HGNC Symbol	FBXO33	protein_coding	3	4.4447	-2.307	4.0405	-5.6491	3.785e-05	0.0012464	2.3328
Smad nuclear interacting protein 1 [Source:HGNC Symbol;Acc:HGNC:30587]	ENSG00000163877	79753	HGNC Symbol	SNIP1	protein_coding	4	4.0438	-1.5708	3.6222	-5.6445	3.8185e-05	0.001254	2.324
malate dehydrogenase 1 [Source:HGNC Symbol;Acc:HGNC:6970]	ENSG00000014641	4190	HGNC Symbol	MDH1	protein_coding	16	8.9374	1.1944	8.7674	5.6416	3.8402e-05	0.0012577	2.3184
zinc finger CCCH-type containing 4 [Source:NCBI gene;Acc:23211]	ENSG00000130749	23211	Clone-based (Ensembl) gene	AC008755.1	protein_coding	5	4.813	1.397	4.6455	5.6376	3.87e-05	0.001264	2.3108
ATPase H+ transporting V1 subunit C1 [Source:HGNC Symbol;Acc:HGNC:856]	ENSG00000155097	528	HGNC Symbol	ATP6V1C1	protein_coding	6	5.9033	1.2827	5.4118	5.6341	3.8954e-05	0.0012689	2.3042
SERTA domain containing 2 [Source:HGNC Symbol;Acc:HGNC:30784]	ENSG00000179833	9792	HGNC Symbol	SERTAD2	protein_coding	3	3.968	-1.9275	3.8728	-5.6323	3.9094e-05	0.00127	2.3007
acyl-CoA thioesterase 13 [Source:HGNC Symbol;Acc:HGNC:20999]	ENSG00000112304	55856	HGNC Symbol	ACOT13	protein_coding	3	5.0564	1.2192	4.8743	5.6285	3.9381e-05	0.0012758	2.2934
TNF receptor superfamily member 9 [Source:HGNC Symbol;Acc:HGNC:11924]	ENSG00000049249	3604	HGNC Symbol	TNFRSF9	protein_coding	4	8.1591	5.7245	9.1742	5.6167	4.0286e-05	0.0012981	2.2709
shugoshin 1 [Source:HGNC Symbol;Acc:HGNC:25088]	ENSG00000129810	151648	HGNC Symbol	SGO1	protein_coding	13	3.0195	1.4392	2.2107	5.618	4.0186e-05	0.0012981	2.2734
NOP10 ribonucleoprotein [Source:HGNC Symbol;Acc:HGNC:14378]	ENSG00000182117	55505	HGNC Symbol	NOP10	protein_coding	2	8.3169	1.5555	8.2784	5.6125	4.0608e-05	0.0013042	2.263
TNFAIP3 interacting protein 2 [Source:HGNC Symbol;Acc:HGNC:19118]	ENSG00000168884	79155	HGNC Symbol	TNIP2	protein_coding	7	2.8895	1.5322	3.1482	5.6115	4.0691e-05	0.0013042	2.261
mago homolog B, exon junction complex subunit [Source:HGNC Symbol;Acc:HGNC:25504]	ENSG00000111196	55110	HGNC Symbol	MAGOHB	protein_coding	11	6.4086	2.6535	6.6326	5.6004	4.1569e-05	0.0013288	2.2398
mitochondrial ribosomal protein S11 [Source:HGNC Symbol;Acc:HGNC:14050]	ENSG00000181991	64963	HGNC Symbol	MRPS11	protein_coding	11	5.665	0.93333	5.4479	5.5989	4.1687e-05	0.001329	2.237
mitochondrial ribosomal protein L45 [Source:HGNC Symbol;Acc:HGNC:16651]	ENSG00000278845	84311	HGNC Symbol	MRPL45	protein_coding	2	6.5135	1.1703	6.1743	5.5943	4.2064e-05	0.0013339	2.2281
transforming growth factor beta regulator 4 [Source:HGNC Symbol;Acc:HGNC:17443]	ENSG00000136270	9238	HGNC Symbol	TBRG4	protein_coding	17	5.0088	1.15	5.1795	5.5944	4.2057e-05	0.0013339	2.2282
RNA exonuclease 2 [Source:HGNC Symbol;Acc:HGNC:17851]	ENSG00000076043	25996	HGNC Symbol	REXO2	protein_coding	20	4.7531	1.0748	4.5301	5.5835	4.2951e-05	0.0013585	2.2074
glutamic-oxaloacetic transaminase 1 [Source:HGNC Symbol;Acc:HGNC:4432]	ENSG00000120053	2805	HGNC Symbol	GOT1	protein_coding	3	6.4477	2.4159	6.4791	5.5754	4.3625e-05	0.0013761	2.192
solute carrier family 39 member 14 [Source:HGNC Symbol;Acc:HGNC:20858]	ENSG00000104635	23516	HGNC Symbol	SLC39A14	protein_coding	12	4.106	2.1089	3.9719	5.5616	4.4802e-05	0.0013799	2.1655
acid phosphatase 2, lysosomal [Source:HGNC Symbol;Acc:HGNC:123]	ENSG00000134575	53	HGNC Symbol	ACP2	protein_coding	14	4.123	1.8475	4.0383	5.5642	4.4579e-05	0.0013799	2.1705
histone acetyltransferase 1 [Source:HGNC Symbol;Acc:HGNC:4821]	ENSG00000128708	8520	HGNC Symbol	HAT1	protein_coding	6	7.4811	1.1973	7.3899	5.5697	4.411e-05	0.0013799	2.181
tetratricopeptide repeat domain 1 [Source:HGNC Symbol;Acc:HGNC:12391]	ENSG00000113312	7265	HGNC Symbol	TTC1	protein_coding	5	7.4107	1.0744	7.2842	5.5703	4.4053e-05	0.0013799	2.1823
mitochondrial ribosomal protein S18A [Source:HGNC Symbol;Acc:HGNC:14515]	ENSG00000096080	55168	HGNC Symbol	MRPS18A	protein_coding	3	5.5553	1.0625	5.4391	5.5609	4.4861e-05	0.0013799	2.1643
exosome component 3 [Source:HGNC Symbol;Acc:HGNC:17944]	ENSG00000107371	51010	HGNC Symbol	EXOSC3	protein_coding	8	3.5951	0.99525	3.2292	5.5605	4.4895e-05	0.0013799	2.1635
transcription factor 7 like 2 [Source:HGNC Symbol;Acc:HGNC:11641]	ENSG00000148737	6934	HGNC Symbol	TCF7L2	protein_coding	30	2.5329	-1.6979	2.3736	-5.5662	4.4403e-05	0.0013799	2.1744
kelch repeat and BTB domain containing 2 [Source:HGNC Symbol;Acc:HGNC:21751]	ENSG00000170852	25948	HGNC Symbol	KBTBD2	protein_coding	8	6.0742	-1.8744	5.7502	-5.5694	4.4133e-05	0.0013799	2.1805
vesicle associated membrane protein 2 [Source:HGNC Symbol;Acc:HGNC:12643]	ENSG00000220205	6844	HGNC Symbol	VAMP2	protein_coding	4	4.5985	-1.9008	4.798	-5.5679	4.4265e-05	0.0013799	2.1775
novel transcript	ENSG00000272462	NA	Clone-based (Ensembl) gene	U91328.1	lincRNA	1	2.7305	-2.1952	2.5345	-5.5648	4.4528e-05	0.0013799	2.1716
immediate early response 3 interacting protein 1 [Source:HGNC Symbol;Acc:HGNC:18550]	ENSG00000134049	51124	HGNC Symbol	IER3IP1	protein_coding	2	6.0823	1.4482	6.13	5.5583	4.5089e-05	0.0013823	2.1592
chromobox 4 [Source:HGNC Symbol;Acc:HGNC:1554]	ENSG00000141582	8535	HGNC Symbol	CBX4	protein_coding	4	1.6101	-2.671	1.3242	-5.5527	4.5585e-05	0.0013939	2.1484
signal peptidase complex subunit 2 [Source:HGNC Symbol;Acc:HGNC:28962]	ENSG00000118363	9789	HGNC Symbol	SPCS2	protein_coding	9	8.1906	1.4289	8.4476	5.5469	4.6099e-05	0.0014061	2.1373
peroxiredoxin 1 [Source:HGNC Symbol;Acc:HGNC:9352]	ENSG00000117450	5052	HGNC Symbol	PRDX1	protein_coding	6	6.912	2.2896	7.0375	5.5404	4.6679e-05	0.0014202	2.1249
C-C motif chemokine ligand 3 like 1 [Source:HGNC Symbol;Acc:HGNC:10628]	ENSG00000276085	6349	HGNC Symbol	CCL3L1	protein_coding	3	6.54	2.0458	6.8709	5.5336	4.7298e-05	0.0014245	2.1118
PRKCQ antisense RNA 1 [Source:HGNC Symbol;Acc:HGNC:44689]	ENSG00000237943	NA	HGNC Symbol	PRKCQ-AS1	processed_transcript	20	6.1929	1.9858	6.0486	5.5353	4.7139e-05	0.0014245	2.1151
SS nuclear autoantigen 1 [Source:HGNC Symbol;Acc:HGNC:11321]	ENSG00000176101	8636	HGNC Symbol	SSNA1	protein_coding	4	3.9689	1.2535	4.2301	5.5345	4.7216e-05	0.0014245	2.1135
methyltransferase like 6 [Source:HGNC Symbol;Acc:HGNC:28343]	ENSG00000206562	131965	HGNC Symbol	METTL6	protein_coding	10	4.9021	1.1726	4.7551	5.5341	4.7252e-05	0.0014245	2.1128
period circadian regulator 1 [Source:NCBI gene;Acc:5187]	ENSG00000179094	5187	Clone-based (Ensembl) gene	AC129492.1	protein_coding	19	2.8344	-3.8479	2.2628	-5.532	4.7444e-05	0.0014253	2.1087
potassium channel tetramerization domain containing 21 [Source:HGNC Symbol;Acc:HGNC:27452]	ENSG00000188997	283219	HGNC Symbol	KCTD21	protein_coding	6	2.7668	1.4129	2.0404	5.5272	4.7889e-05	0.0014321	2.0995
CLPTM1 like [Source:HGNC Symbol;Acc:HGNC:24308]	ENSG00000049656	81037	HGNC Symbol	CLPTM1L	protein_coding	16	3.587	1.0187	3.6966	5.5259	4.8013e-05	0.0014321	2.0969
integrin subunit alpha L [Source:HGNC Symbol;Acc:HGNC:6148]	ENSG00000005844	3683	HGNC Symbol	ITGAL	protein_coding	19	7.9456	-1.7767	7.9438	-5.5257	4.8026e-05	0.0014321	2.0966
DExD-box helicase 39B [Source:HGNC Symbol;Acc:HGNC:13917]	ENSG00000198563	7919	HGNC Symbol	DDX39B	protein_coding	21	2.956	-1.2555	3.2394	-5.5208	4.8486e-05	0.0014422	2.0872
SH3 domain containing 19 [Source:HGNC Symbol;Acc:HGNC:30418]	ENSG00000109686	152503	HGNC Symbol	SH3D19	protein_coding	14	1.9112	-2.7195	1.4047	-5.5183	4.8722e-05	0.0014456	2.0824
transmembrane 6 superfamily member 1 [Source:HGNC Symbol;Acc:HGNC:11860]	ENSG00000136404	53346	HGNC Symbol	TM6SF1	protein_coding	8	4.85	1.8509	4.9087	5.5132	4.9203e-05	0.001452	2.0726
MLX, MAX dimerization protein [Source:HGNC Symbol;Acc:HGNC:11645]	ENSG00000108788	6945	HGNC Symbol	MLX	protein_coding	11	6.5701	1.0416	6.4331	5.5122	4.9301e-05	0.001452	2.0707
laminin subunit alpha 2 [Source:HGNC Symbol;Acc:HGNC:6482]	ENSG00000196569	3908	HGNC Symbol	LAMA2	protein_coding	7	1.6453	-1.9056	1.1089	-5.5142	4.9107e-05	0.001452	2.0746
cleavage stimulation factor subunit 2 [Source:HGNC Symbol;Acc:HGNC:2484]	ENSG00000101811	1478	HGNC Symbol	CSTF2	protein_coding	4	5.2473	2.0614	5.4083	5.5041	5.0085e-05	0.0014715	2.055
PHD finger protein 23 [Source:HGNC Symbol;Acc:HGNC:28428]	ENSG00000040633	79142	HGNC Symbol	PHF23	protein_coding	13	4.5135	1.6792	4.1697	5.5004	5.0441e-05	0.0014747	2.048
WD repeat domain 26 [Source:HGNC Symbol;Acc:HGNC:21208]	ENSG00000162923	80232	HGNC Symbol	WDR26	protein_coding	10	5.9699	-1.7333	6.041	-5.5004	5.0441e-05	0.0014747	2.048
RNA polymerase I subunit E [Source:HGNC Symbol;Acc:HGNC:17631]	ENSG00000137054	64425	HGNC Symbol	POLR1E	protein_coding	3	4.6288	1.6567	4.9801	5.4865	5.1825e-05	0.0015078	2.0211
family with sequence similarity 3 member C [Source:HGNC Symbol;Acc:HGNC:18664]	ENSG00000196937	10447	HGNC Symbol	FAM3C	protein_coding	5	4.7886	1.6292	4.7862	5.4867	5.1804e-05	0.0015078	2.0215
trans-golgi network vesicle protein 23 homolog B [Source:HGNC Symbol;Acc:HGNC:20399]	ENSG00000171928	51030	HGNC Symbol	TVP23B	protein_coding	10	6.9919	1.7744	7.1114	5.4831	5.2169e-05	0.0015087	2.0146
mitochondrial rRNA methyltransferase 2 [Source:HGNC Symbol;Acc:HGNC:16352]	ENSG00000122687	29960	HGNC Symbol	MRM2	protein_coding	5	6.316	1.1553	6.1435	5.4824	5.2234e-05	0.0015087	2.0133
regulator of microtubule dynamics 3 [Source:HGNC Symbol;Acc:HGNC:25550]	ENSG00000137824	55177	HGNC Symbol	RMDN3	protein_coding	11	4.1879	-1.032	4.3766	-5.4846	5.202e-05	0.0015087	2.0174
cyclin dependent kinase 4 [Source:HGNC Symbol;Acc:HGNC:1773]	ENSG00000135446	1019	HGNC Symbol	CDK4	protein_coding	15	4.5544	2.4713	4.458	5.4785	5.264e-05	0.0015168	2.0057
HIRA interacting protein 3 [Source:HGNC Symbol;Acc:HGNC:4917]	ENSG00000149929	8479	HGNC Symbol	HIRIP3	protein_coding	7	4.2245	1.398	3.9465	5.4723	5.3275e-05	0.0015314	1.9938
eukaryotic translation initiation factor 2 subunit beta [Source:HGNC Symbol;Acc:HGNC:3266]	ENSG00000125977	8894	HGNC Symbol	EIF2S2	protein_coding	1	7.0866	1.8543	7.2139	5.4648	5.4056e-05	0.0015498	1.9793
prohibitin [Source:HGNC Symbol;Acc:HGNC:8912]	ENSG00000167085	5245	HGNC Symbol	PHB	protein_coding	15	7.7222	1.535	7.876	5.4612	5.4438e-05	0.0015498	1.9724
cryptochrome circadian regulator 2 [Source:HGNC Symbol;Acc:HGNC:2385]	ENSG00000121671	1408	HGNC Symbol	CRY2	protein_coding	12	3.3291	-1.6344	3.0476	-5.4589	5.4679e-05	0.0015498	1.968
U2 small nuclear RNA auxiliary factor 1 like 4 [Source:HGNC Symbol;Acc:HGNC:23020]	ENSG00000161265	199746	HGNC Symbol	U2AF1L4	protein_coding	21	4.1399	-1.694	3.9843	-5.4619	5.4366e-05	0.0015498	1.9737
regulatory factor X3 [Source:HGNC Symbol;Acc:HGNC:9984]	ENSG00000080298	5991	HGNC Symbol	RFX3	protein_coding	12	3.6082	-2.324	3.4984	-5.4588	5.4688e-05	0.0015498	1.9678
phosphatidylinositol specific phospholipase C X domain containing 2 [Source:HGNC Symbol;Acc:HGNC:26462]	ENSG00000240891	257068	HGNC Symbol	PLCXD2	protein_coding	5	2.7083	-2.4672	2.6093	-5.4589	5.4682e-05	0.0015498	1.9679
DNA fragmentation factor subunit alpha [Source:HGNC Symbol;Acc:HGNC:2772]	ENSG00000160049	1676	HGNC Symbol	DFFA	protein_coding	3	6.2844	0.89919	6.3113	5.453	5.531e-05	0.0015637	1.9566
ribosomal oxygenase 2 [Source:HGNC Symbol;Acc:HGNC:19441]	ENSG00000170854	84864	HGNC Symbol	RIOX2	protein_coding	9	5.1076	1.841	5.2748	5.4485	5.5798e-05	0.0015717	1.9479
mindbomb E3 ubiquitin protein ligase 2 [Source:HGNC Symbol;Acc:HGNC:30577]	ENSG00000197530	142678	HGNC Symbol	MIB2	protein_coding	32	2.289	-3.368	1.8995	-5.448	5.5855e-05	0.0015717	1.9469
TNF alpha induced protein 8 [Source:HGNC Symbol;Acc:HGNC:17260]	ENSG00000145779	25816	HGNC Symbol	TNFAIP8	protein_coding	7	7.9506	3.5282	8.3902	5.4444	5.6245e-05	0.0015729	1.94
ankyrin repeat domain 40 [Source:HGNC Symbol;Acc:HGNC:28233]	ENSG00000154945	91369	HGNC Symbol	ANKRD40	protein_coding	3	6.7302	1.073	6.8313	5.444	5.6292e-05	0.0015729	1.9391
gametogenetin binding protein 2 [Source:HGNC Symbol;Acc:HGNC:19357]	ENSG00000278311	79893	HGNC Symbol	GGNBP2	protein_coding	9	6.3972	-1.3704	6.2474	-5.4445	5.624e-05	0.0015729	1.9401
aminoacyl tRNA synthetase complex interacting multifunctional protein 2 [Source:HGNC Symbol;Acc:HGNC:20609]	ENSG00000106305	7965	HGNC Symbol	AIMP2	protein_coding	4	4.5363	2.123	4.5508	5.4419	5.652e-05	0.0015756	1.9351
zinc finger AN1-type containing 2A [Source:HGNC Symbol;Acc:HGNC:28073]	ENSG00000178381	90637	HGNC Symbol	ZFAND2A	protein_coding	7	5.9859	-1.1634	6.1032	-5.4394	5.6797e-05	0.0015796	1.9303
transmembrane protein 62 [Source:HGNC Symbol;Acc:HGNC:26269]	ENSG00000137842	80021	HGNC Symbol	TMEM62	protein_coding	15	3.0418	-1.4671	2.8272	-5.4356	5.7217e-05	0.0015876	1.923
ribosomal RNA processing 15 homolog [Source:HGNC Symbol;Acc:HGNC:24255]	ENSG00000067533	51018	HGNC Symbol	RRP15	protein_coding	2	4.8854	2.0499	4.9404	5.4275	5.8135e-05	0.0016094	1.9072
myeloid associated differentiation marker [Source:HGNC Symbol;Acc:HGNC:7544]	ENSG00000179820	91663	HGNC Symbol	MYADM	protein_coding	11	6.3561	-1.7677	6.1422	-5.4229	5.8658e-05	0.0016201	1.8983
adaptor related protein complex 1 associated regulatory protein [Source:HGNC Symbol;Acc:HGNC:28808]	ENSG00000138660	55435	HGNC Symbol	AP1AR	protein_coding	6	2.9464	1.9051	3.1271	5.421	5.8875e-05	0.0016213	1.8947
novel transcript	ENSG00000271869	NA	Clone-based (Ensembl) gene	AC026979.2	lincRNA	1	3.2062	-3.3454	3.8264	-5.4201	5.8973e-05	0.0016213	1.893
C-C motif chemokine ligand 4 like 2 [Source:HGNC Symbol;Acc:HGNC:24066]	ENSG00000276070	9560	HGNC Symbol	CCL4L2	protein_coding	10	9.2996	3.8063	9.2481	5.4106	6.0085e-05	0.0016457	1.8745
pterin-4 alpha-carbinolamine dehydratase 1 [Source:HGNC Symbol;Acc:HGNC:8646]	ENSG00000166228	5092	HGNC Symbol	PCBD1	protein_coding	3	3.19	1.4621	3.2487	5.4102	6.0133e-05	0.0016457	1.8737
ribitol xylosyltransferase 1 [Source:HGNC Symbol;Acc:HGNC:13530]	ENSG00000118600	10329	HGNC Symbol	RXYLT1	protein_coding	8	3.2535	1.1135	3.0224	5.399	6.1455e-05	0.001678	1.8521
isoprenylcysteine carboxyl methyltransferase [Source:HGNC Symbol;Acc:HGNC:5350]	ENSG00000116237	23463	HGNC Symbol	ICMT	protein_coding	4	3.617	1.4402	3.5998	5.3917	6.2339e-05	0.0016888	1.838
general transcription factor IIIC subunit 6 [Source:HGNC Symbol;Acc:HGNC:20872]	ENSG00000155115	112495	HGNC Symbol	GTF3C6	protein_coding	2	6.2226	1.342	6.407	5.39	6.2552e-05	0.0016888	1.8346
cyclin H [Source:HGNC Symbol;Acc:HGNC:1594]	ENSG00000134480	902	HGNC Symbol	CCNH	protein_coding	14	7.1976	-1.0531	7.2376	-5.3924	6.2262e-05	0.0016888	1.8392
CD69 molecule [Source:HGNC Symbol;Acc:HGNC:1694]	ENSG00000110848	969	HGNC Symbol	CD69	protein_coding	4	10.439	-2.0497	11.279	-5.3915	6.2371e-05	0.0016888	1.8375
CDC like kinase 1 [Source:HGNC Symbol;Acc:HGNC:2068]	ENSG00000013441	1195	HGNC Symbol	CLK1	protein_coding	15	8.0238	-2.24	7.4286	-5.391	6.2433e-05	0.0016888	1.8365
CD82 molecule [Source:HGNC Symbol;Acc:HGNC:6210]	ENSG00000085117	3732	HGNC Symbol	CD82	protein_coding	14	4.0799	2.7355	3.8422	5.3876	6.2843e-05	0.001689	1.83
ATPase plasma membrane Ca2+ transporting 1 [Source:HGNC Symbol;Acc:HGNC:814]	ENSG00000070961	490	HGNC Symbol	ATP2B1	protein_coding	11	5.0311	-1.7179	4.7184	-5.3878	6.2821e-05	0.001689	1.8303
GNAS complex locus [Source:HGNC Symbol;Acc:HGNC:4392]	ENSG00000087460	2778	HGNC Symbol	GNAS	protein_coding	58	7.983	-1.1388	8.1017	-5.3835	6.3354e-05	0.0016989	1.8219
ankyrin repeat domain 36C [Source:HGNC Symbol;Acc:HGNC:32946]	ENSG00000174501	400986	HGNC Symbol	ANKRD36C	protein_coding	8	6.0655	-1.9146	6.0008	-5.3793	6.3874e-05	0.0017091	1.8138
SEC22 homolog B, vesicle trafficking protein (gene/pseudogene) [Source:HGNC Symbol;Acc:HGNC:10700]	ENSG00000265808	9554	HGNC Symbol	SEC22B	protein_coding	2	6.8028	1.4173	6.818	5.3751	6.4406e-05	0.0017195	1.8056
poly(A) binding protein cytoplasmic 3 [Source:HGNC Symbol;Acc:HGNC:8556]	ENSG00000151846	5042	HGNC Symbol	PABPC3	protein_coding	1	2.3326	-1.4137	2.2952	-5.3695	6.5107e-05	0.0017343	1.7949
syndecan 4 [Source:HGNC Symbol;Acc:HGNC:10661]	ENSG00000124145	6385	HGNC Symbol	SDC4	protein_coding	1	3.9188	3.2076	3.9697	5.3662	6.5531e-05	0.0017363	1.7884
cornichon family AMPA receptor auxiliary protein 1 [Source:HGNC Symbol;Acc:HGNC:19431]	ENSG00000100528	10175	HGNC Symbol	CNIH1	protein_coding	7	6.3107	1.2114	6.1556	5.3671	6.5412e-05	0.0017363	1.7902
endothelial differentiation related factor 1 [Source:HGNC Symbol;Acc:HGNC:3164]	ENSG00000107223	8721	HGNC Symbol	EDF1	protein_coding	3	7.2018	1.0674	7.5532	5.3655	6.5616e-05	0.0017363	1.7872
N(alpha)-acetyltransferase 20, NatB catalytic subunit [Source:HGNC Symbol;Acc:HGNC:15908]	ENSG00000173418	51126	HGNC Symbol	NAA20	protein_coding	7	7.0548	1.4261	7.1325	5.3642	6.5786e-05	0.0017369	1.7846
gamma-secretase activating protein [Source:HGNC Symbol;Acc:HGNC:28042]	ENSG00000186088	54103	HGNC Symbol	GSAP	protein_coding	13	5.0605	-3.5572	4.9531	-5.3626	6.5999e-05	0.0017387	1.7814
RP9, pre-mRNA splicing factor [Source:HGNC Symbol;Acc:HGNC:10288]	ENSG00000164610	6100	HGNC Symbol	RP9	protein_coding	4	2.5443	-1.0142	2.6741	-5.3608	6.6233e-05	0.0017411	1.7779
TATA-box binding protein associated factor 10 [Source:HGNC Symbol;Acc:HGNC:11543]	ENSG00000166337	6881	HGNC Symbol	TAF10	protein_coding	5	2.6679	-1.3883	2.7175	-5.352	6.7375e-05	0.0017672	1.7609
establishment of sister chromatid cohesion N-acetyltransferase 1 [Source:HGNC Symbol;Acc:HGNC:24645]	ENSG00000141446	114799	HGNC Symbol	ESCO1	protein_coding	4	5.4377	-1.7106	5.1702	-5.348	6.7918e-05	0.0017751	1.753
protein phosphatase, Mg2+/Mn2+ dependent 1L [Source:HGNC Symbol;Acc:HGNC:16381]	ENSG00000163590	151742	HGNC Symbol	PPM1L	protein_coding	5	2.3891	-2.5119	2.4481	-5.3475	6.7972e-05	0.0017751	1.7522
family with sequence similarity 122B [Source:HGNC Symbol;Acc:HGNC:30490]	ENSG00000156504	159090	HGNC Symbol	FAM122B	protein_coding	8	4.0244	-1.2742	4.0627	-5.3457	6.8213e-05	0.0017775	1.7487
refilin B [Source:HGNC Symbol;Acc:HGNC:28705]	ENSG00000183688	359845	HGNC Symbol	RFLNB	protein_coding	1	4.7314	0.97702	4.607	5.3416	6.8769e-05	0.0017881	1.7406
desumoylating isopeptidase 1 [Source:HGNC Symbol;Acc:HGNC:24577]	ENSG00000100418	27351	HGNC Symbol	DESI1	protein_coding	4	3.418	1.5012	3.8229	5.34	6.8992e-05	0.0017884	1.7374
protein O-fucosyltransferase 1 [Source:HGNC Symbol;Acc:HGNC:14988]	ENSG00000101346	23509	HGNC Symbol	POFUT1	protein_coding	5	2.992	1.4045	3.172	5.3393	6.9079e-05	0.0017884	1.7362
hepatitis A virus cellular receptor 2 [Source:HGNC Symbol;Acc:HGNC:18437]	ENSG00000135077	84868	HGNC Symbol	HAVCR2	protein_coding	6	9.8527	2.6418	10.177	5.331	7.0213e-05	0.0018081	1.72
proteasome 26S subunit, non-ATPase 10 [Source:HGNC Symbol;Acc:HGNC:9555]	ENSG00000101843	5716	HGNC Symbol	PSMD10	protein_coding	7	6.527	0.84315	6.5022	5.3304	7.0292e-05	0.0018081	1.7189
yippee like 5 [Source:HGNC Symbol;Acc:HGNC:18329]	ENSG00000119801	51646	HGNC Symbol	YPEL5	protein_coding	10	7.9298	-1.8384	7.8361	-5.3318	7.0104e-05	0.0018081	1.7215
delta 4-desaturase, sphingolipid 1 [Source:HGNC Symbol;Acc:HGNC:13709]	ENSG00000143753	8560	HGNC Symbol	DEGS1	protein_coding	5	5.8997	1.788	5.8922	5.3277	7.0671e-05	0.001814	1.7136
NAD(P) dependent steroid dehydrogenase-like [Source:HGNC Symbol;Acc:HGNC:13398]	ENSG00000147383	50814	HGNC Symbol	NSDHL	protein_coding	3	5.0733	1.5885	5.1779	5.3147	7.2498e-05	0.001854	1.6882
UTP14C, small subunit processome component [Source:HGNC Symbol;Acc:HGNC:20321]	ENSG00000253797	9724	HGNC Symbol	UTP14C	protein_coding	1	3.9461	1.2919	3.9563	5.3133	7.2692e-05	0.001854	1.6856
coiled-coil-helix-coiled-coil-helix domain containing 1 [Source:HGNC Symbol;Acc:HGNC:23518]	ENSG00000172586	118487	HGNC Symbol	CHCHD1	protein_coding	2	4.7651	1.2637	4.543	5.3139	7.2614e-05	0.001854	1.6867
novel transcript	ENSG00000259834	NA	Clone-based (Ensembl) gene	AL365361.1	lincRNA	1	2.4812	2.2526	2.7143	5.307	7.3605e-05	0.0018614	1.6732
intraflagellar transport 46 [Source:HGNC Symbol;Acc:HGNC:26146]	ENSG00000118096	56912	HGNC Symbol	IFT46	protein_coding	12	4.7601	1.1946	4.3241	5.3089	7.3335e-05	0.0018614	1.6769
receptor interacting serine/threonine kinase 2 [Source:HGNC Symbol;Acc:HGNC:10020]	ENSG00000104312	8767	HGNC Symbol	RIPK2	protein_coding	4	3.5159	-1.5816	3.7932	-5.3076	7.3515e-05	0.0018614	1.6744
family with sequence similarity 160 member B1 [Source:HGNC Symbol;Acc:HGNC:29320]	ENSG00000151553	57700	HGNC Symbol	FAM160B1	protein_coding	4	3.8083	-1.9301	3.4828	-5.3085	7.3389e-05	0.0018614	1.6761
mannose-P-dolichol utilization defect 1 [Source:HGNC Symbol;Acc:HGNC:7207]	ENSG00000129255	9526	HGNC Symbol	MPDU1	protein_coding	27	4.1746	2.3747	4.1721	5.3017	7.4372e-05	0.0018768	1.6629
small integral membrane protein 15 [Source:HGNC Symbol;Acc:HGNC:33861]	ENSG00000188725	643155	HGNC Symbol	SMIM15	protein_coding	2	4.5692	1.2644	4.4409	5.2974	7.5011e-05	0.001889	1.6544
interleukin 4 receptor [Source:HGNC Symbol;Acc:HGNC:6015]	ENSG00000077238	3566	HGNC Symbol	IL4R	protein_coding	19	4.9076	1.3356	4.9645	5.2952	7.5337e-05	0.0018932	1.6502
minichromosome maintenance complex binding protein [Source:HGNC Symbol;Acc:HGNC:25782]	ENSG00000197771	79892	HGNC Symbol	MCMBP	protein_coding	5	5.5851	1.5829	5.6623	5.2934	7.5605e-05	0.001896	1.6466
nuclear cap binding protein subunit 2 [Source:HGNC Symbol;Acc:HGNC:7659]	ENSG00000114503	22916	HGNC Symbol	NCBP2	protein_coding	13	6.808	1.5373	6.937	5.2838	7.7036e-05	0.0019206	1.628
MIS12, kinetochore complex component [Source:HGNC Symbol;Acc:HGNC:24967]	ENSG00000167842	79003	HGNC Symbol	MIS12	protein_coding	6	5.794	1.5158	5.7622	5.2851	7.6842e-05	0.0019206	1.6305
WAS protein homolog associated with actin, golgi membranes and microtubules [Source:HGNC Symbol;Acc:HGNC:30493]	ENSG00000156232	123720	HGNC Symbol	WHAMM	protein_coding	2	5.3503	-2.0513	5.1096	-5.2836	7.7066e-05	0.0019206	1.6277
phospholipid phosphatase 5 [Source:HGNC Symbol;Acc:HGNC:25026]	ENSG00000147535	84513	HGNC Symbol	PLPP5	protein_coding	15	5.4911	1.253	5.8023	5.2809	7.7476e-05	0.0019268	1.6224
cytochrome P450 family 1 subfamily B member 1 [Source:HGNC Symbol;Acc:HGNC:2597]	ENSG00000138061	1545	HGNC Symbol	CYP1B1	protein_coding	7	1.5352	2.2565	1.0564	5.277	7.8085e-05	0.0019379	1.6146
zinc finger C3HC-type containing 1 [Source:HGNC Symbol;Acc:HGNC:29913]	ENSG00000091732	51530	HGNC Symbol	ZC3HC1	protein_coding	12	5.8826	1.1218	5.6351	5.2752	7.835e-05	0.0019405	1.6113
polypeptide N-acetylgalactosaminyltransferase 3 [Source:HGNC Symbol;Acc:HGNC:4125]	ENSG00000115339	2591	HGNC Symbol	GALNT3	protein_coding	9	3.9092	-1.8795	3.6902	-5.2662	7.9753e-05	0.0019711	1.5937
MYC proto-oncogene, bHLH transcription factor [Source:HGNC Symbol;Acc:HGNC:7553]	ENSG00000136997	4609	HGNC Symbol	MYC	protein_coding	12	4.2501	2.9564	4.3999	5.2577	8.1113e-05	0.0020006	1.5769
tetratricopeptide repeat domain 33 [Source:HGNC Symbol;Acc:HGNC:29959]	ENSG00000113638	23548	HGNC Symbol	TTC33	protein_coding	7	4.7751	1.7351	4.4528	5.2448	8.32e-05	0.0020437	1.5517
tet methylcytosine dioxygenase 2 [Source:HGNC Symbol;Acc:HGNC:25941]	ENSG00000168769	54790	HGNC Symbol	TET2	protein_coding	9	6.2368	-1.5722	6.3335	-5.245	8.3172e-05	0.0020437	1.552
pleiotropic regulator 1 [Source:HGNC Symbol;Acc:HGNC:9089]	ENSG00000171566	5356	HGNC Symbol	PLRG1	protein_coding	13	7.2262	1.13	7.1027	5.2336	8.5053e-05	0.0020808	1.5299
modulator of apoptosis 1 [Source:HGNC Symbol;Acc:HGNC:16658]	ENSG00000165943	64112	HGNC Symbol	MOAP1	protein_coding	2	4.3407	-1.6917	4.3288	-5.2336	8.5058e-05	0.0020808	1.5298
pyrroline-5-carboxylate reductase 1 [Source:HGNC Symbol;Acc:HGNC:9721]	ENSG00000183010	5831	HGNC Symbol	PYCR1	protein_coding	17	1.8229	5.4793	2.1102	5.23	8.5663e-05	0.0020851	1.5228
solute carrier family 25 member 44 [Source:HGNC Symbol;Acc:HGNC:29036]	ENSG00000160785	9673	HGNC Symbol	SLC25A44	protein_coding	5	5.2829	2.3376	5.1858	5.2284	8.5929e-05	0.0020851	1.5197
ethylmalonyl-CoA decarboxylase 1 [Source:HGNC Symbol;Acc:HGNC:21489]	ENSG00000093144	55862	HGNC Symbol	ECHDC1	protein_coding	23	6.4132	1.4329	6.454	5.2288	8.587e-05	0.0020851	1.5204
RNA binding motif protein 7 [Source:HGNC Symbol;Acc:HGNC:9904]	ENSG00000076053	10179	HGNC Symbol	RBM7	protein_coding	9	5.5254	-1.4371	5.0116	-5.2314	8.5424e-05	0.0020851	1.5256
translocase of inner mitochondrial membrane 8 homolog B [Source:HGNC Symbol;Acc:HGNC:11818]	ENSG00000150779	26521	HGNC Symbol	TIMM8B	protein_coding	4	6.3938	1.3896	6.2213	5.2235	8.6779e-05	0.0021014	1.51
STAG3L5P-PVRIG2P-PILRB readthrough [Source:HGNC Symbol;Acc:HGNC:48898]	ENSG00000272752	NA	HGNC Symbol	STAG3L5P-PVRIG2P-PILRB	processed_transcript	5	2.8807	-1.4904	2.8024	-5.2215	8.7124e-05	0.0021056	1.506
NSF attachment protein beta [Source:HGNC Symbol;Acc:HGNC:15751]	ENSG00000125814	63908	HGNC Symbol	NAPB	protein_coding	7	3.5393	-2.1539	3.2319	-5.2189	8.7573e-05	0.0021121	1.5009
RNA polymerase II subunit L [Source:HGNC Symbol;Acc:HGNC:9199]	ENSG00000177700	5441	HGNC Symbol	POLR2L	protein_coding	2	6.2818	1.0392	6.5136	5.214	8.8425e-05	0.0021157	1.4913
CCR4-NOT transcription complex subunit 8 [Source:HGNC Symbol;Acc:HGNC:9207]	ENSG00000155508	9337	HGNC Symbol	CNOT8	protein_coding	25	5.3317	-1.4445	5.2266	-5.2167	8.7944e-05	0.0021157	1.4967
protein arginine methyltransferase 9 [Source:HGNC Symbol;Acc:HGNC:25099]	ENSG00000164169	90826	HGNC Symbol	PRMT9	protein_coding	4	3.5759	-1.7433	3.2251	-5.215	8.8248e-05	0.0021157	1.4933
lysine demethylase 3A [Source:HGNC Symbol;Acc:HGNC:20815]	ENSG00000115548	55818	HGNC Symbol	KDM3A	protein_coding	15	4.8763	-2.8131	4.4329	-5.2151	8.8219e-05	0.0021157	1.4936
G protein-coupled receptor 84 [Source:HGNC Symbol;Acc:HGNC:4535]	ENSG00000139572	53831	HGNC Symbol	GPR84	protein_coding	2	1.8139	6.308	3.0112	5.2065	8.9742e-05	0.0021418	1.4767
BUB3, mitotic checkpoint protein [Source:HGNC Symbol;Acc:HGNC:1151]	ENSG00000154473	9184	HGNC Symbol	BUB3	protein_coding	5	9.3749	1.008	9.127	5.2041	9.0168e-05	0.0021418	1.472
solute carrier family 25 member 28 [Source:HGNC Symbol;Acc:HGNC:23472]	ENSG00000155287	81894	HGNC Symbol	SLC25A28	protein_coding	4	3.7123	-1.3737	3.9348	-5.205	9.0009e-05	0.0021418	1.4737
carboxypeptidase Q [Source:HGNC Symbol;Acc:HGNC:16910]	ENSG00000104324	10404	HGNC Symbol	CPQ	protein_coding	9	4.5855	-2.3028	4.3748	-5.2037	9.0233e-05	0.0021418	1.4713
TERF2 interacting protein [Source:HGNC Symbol;Acc:HGNC:19246]	ENSG00000166848	54386	HGNC Symbol	TERF2IP	protein_coding	3	5.2267	-1.019	5.209	-5.2025	9.0453e-05	0.0021428	1.4688
heterogeneous nuclear ribonucleoprotein A3 [Source:HGNC Symbol;Acc:HGNC:24941]	ENSG00000170144	220988	HGNC Symbol	HNRNPA3	protein_coding	5	6.8278	-0.99903	6.942	-5.1987	9.1133e-05	0.0021547	1.4614
poly(ADP-ribose) polymerase family member 15 [Source:HGNC Symbol;Acc:HGNC:26876]	ENSG00000173200	165631	HGNC Symbol	PARP15	protein_coding	6	4.8125	-2.3331	4.9258	-5.1919	9.2366e-05	0.0021786	1.4481
galectin 9 [Source:HGNC Symbol;Acc:HGNC:6570]	ENSG00000168961	3965	HGNC Symbol	LGALS9	protein_coding	16	2.4589	-2.3462	2.102	-5.1911	9.2508e-05	0.0021786	1.4466
proteasome 26S subunit, ATPase 4 [Source:HGNC Symbol;Acc:HGNC:9551]	ENSG00000013275	5704	HGNC Symbol	PSMC4	protein_coding	6	8.8226	1.3927	9.0845	5.1862	9.342e-05	0.0021957	1.4368
cyclin B1 [Source:HGNC Symbol;Acc:HGNC:1579]	ENSG00000134057	891	HGNC Symbol	CCNB1	protein_coding	7	5.7301	2.2696	4.4112	5.1787	9.4826e-05	0.0022239	1.422
TruB pseudouridine synthase family member 2 [Source:HGNC Symbol;Acc:HGNC:17170]	ENSG00000167112	26995	HGNC Symbol	TRUB2	protein_coding	3	4.7364	1.1518	4.6148	5.1778	9.4989e-05	0.0022239	1.4203
carbohydrate sulfotransferase 11 [Source:HGNC Symbol;Acc:HGNC:17422]	ENSG00000171310	50515	HGNC Symbol	CHST11	protein_coding	6	5.5729	2.0707	5.9755	5.176	9.5324e-05	0.0022274	1.4168
S100 calcium binding protein A11 [Source:HGNC Symbol;Acc:HGNC:10488]	ENSG00000163191	6282	HGNC Symbol	S100A11	protein_coding	2	7.9447	1.7782	7.7697	5.1731	9.5871e-05	0.0022315	1.4112
methyl-CpG binding domain protein 6 [Source:HGNC Symbol;Acc:HGNC:20445]	ENSG00000166987	114785	HGNC Symbol	MBD6	protein_coding	14	2.2073	-1.2368	2.2132	-5.1736	9.5785e-05	0.0022315	1.4121
cytochrome c oxidase assembly factor 4 homolog [Source:HGNC Symbol;Acc:HGNC:24604]	ENSG00000181924	51287	HGNC Symbol	COA4	protein_coding	6	5.901	1.5445	6.0227	5.1676	9.6917e-05	0.0022476	1.4004
ADP-ribosylarginine hydrolase [Source:HGNC Symbol;Acc:HGNC:269]	ENSG00000144843	141	HGNC Symbol	ADPRH	protein_coding	7	2.1967	1.3989	1.8984	5.1658	9.7267e-05	0.0022476	1.3968
mitochondrial ribosomal protein S7 [Source:HGNC Symbol;Acc:HGNC:14499]	ENSG00000125445	51081	HGNC Symbol	MRPS7	protein_coding	7	7.2151	1.3295	7.2231	5.1671	9.7022e-05	0.0022476	1.3993
CD160 molecule [Source:HGNC Symbol;Acc:HGNC:17013]	ENSG00000117281	11126	HGNC Symbol	CD160	protein_coding	5	5.5712	-5.5344	4.5139	-5.1656	9.7315e-05	0.0022476	1.3963
sterile alpha motif domain containing 8 [Source:HGNC Symbol;Acc:HGNC:26320]	ENSG00000156671	142891	HGNC Symbol	SAMD8	protein_coding	4	5.1465	-1.4978	4.9198	-5.1628	9.7861e-05	0.0022559	1.3908
RAB39B, member RAS oncogene family [Source:HGNC Symbol;Acc:HGNC:16499]	ENSG00000155961	116442	HGNC Symbol	RAB39B	protein_coding	1	2.2042	1.6112	2.2253	5.1605	9.8304e-05	0.0022617	1.3863
chromosome 12 open reading frame 10 [Source:HGNC Symbol;Acc:HGNC:17590]	ENSG00000139637	60314	HGNC Symbol	C12orf10	protein_coding	10	5.4482	1.1183	5.6096	5.1589	9.8612e-05	0.0022632	1.3832
F-box protein 7 [Source:HGNC Symbol;Acc:HGNC:13586]	ENSG00000100225	25793	HGNC Symbol	FBXO7	protein_coding	9	6.5192	-1.1234	6.3954	-5.1582	9.8747e-05	0.0022632	1.3819
elongator acetyltransferase complex subunit 6 [Source:HGNC Symbol;Acc:HGNC:25976]	ENSG00000163832	54859	HGNC Symbol	ELP6	protein_coding	15	6.2564	0.89181	5.9919	5.1534	9.9694e-05	0.0022735	1.3724
pinin, desmosome associated protein [Source:HGNC Symbol;Acc:HGNC:9162]	ENSG00000100941	5411	HGNC Symbol	PNN	protein_coding	6	7.2856	-1.2671	7.5027	-5.1548	9.9417e-05	0.0022735	1.3752
RFX3 antisense RNA 1 [Source:HGNC Symbol;Acc:HGNC:51197]	ENSG00000232104	NA	HGNC Symbol	RFX3-AS1	lincRNA	3	1.7927	-2.9684	1.263	-5.1531	9.9762e-05	0.0022735	1.3717
protein phosphatase 1 regulatory inhibitor subunit 11 [Source:HGNC Symbol;Acc:HGNC:9285]	ENSG00000204619	6992	HGNC Symbol	PPP1R11	protein_coding	6	6.9953	1.0753	7.4333	5.1468	0.00010102	0.0022965	1.3593
E74 like ETS transcription factor 2 [Source:HGNC Symbol;Acc:HGNC:3317]	ENSG00000109381	1998	HGNC Symbol	ELF2	protein_coding	13	5.7952	-2.2636	5.3794	-5.1461	0.00010115	0.0022965	1.358
TRAF family member associated NFKB activator [Source:HGNC Symbol;Acc:HGNC:11562]	ENSG00000136560	10010	HGNC Symbol	TANK	protein_coding	23	8.3231	2.1279	8.2558	5.1415	0.00010207	0.002297	1.349
taxilin alpha [Source:HGNC Symbol;Acc:HGNC:30685]	ENSG00000084652	200081	HGNC Symbol	TXLNA	protein_coding	2	7.1709	1.6478	7.2554	5.1408	0.00010223	0.002297	1.3475
mago homolog, exon junction complex subunit [Source:HGNC Symbol;Acc:HGNC:6815]	ENSG00000162385	4116	HGNC Symbol	MAGOH	protein_coding	4	6.6166	1.2066	6.6573	5.1425	0.00010187	0.002297	1.351
mitochondrial carrier 2 [Source:HGNC Symbol;Acc:HGNC:17587]	ENSG00000109919	23788	HGNC Symbol	MTCH2	protein_coding	6	7.0971	1.1633	6.8994	5.1441	0.00010156	0.002297	1.354
ubiquitin specific peptidase 36 [Source:HGNC Symbol;Acc:HGNC:20062]	ENSG00000055483	57602	HGNC Symbol	USP36	protein_coding	24	4.8997	-0.97532	4.9196	-5.1433	0.00010171	0.002297	1.3526
RIO kinase 3 [Source:HGNC Symbol;Acc:HGNC:11451]	ENSG00000101782	8780	HGNC Symbol	RIOK3	protein_coding	11	6.9563	-1.5845	6.8754	-5.1403	0.00010233	0.002297	1.3466
PHD finger protein 12 [Source:HGNC Symbol;Acc:HGNC:20816]	ENSG00000109118	57649	HGNC Symbol	PHF12	protein_coding	17	4.2429	-2.1786	3.9087	-5.1344	0.00010354	0.0023198	1.3349
replication protein A3 [Source:HGNC Symbol;Acc:HGNC:10291]	ENSG00000106399	6119	HGNC Symbol	RPA3	protein_coding	7	5.5943	1.0785	5.2473	5.1305	0.00010434	0.0023334	1.3272
deoxythymidylate kinase [Source:HGNC Symbol;Acc:HGNC:3061]	ENSG00000168393	1841	HGNC Symbol	DTYMK	protein_coding	7	4.1107	1.3388	3.9084	5.1288	0.00010468	0.0023367	1.324
zinc finger protein 613 [Source:HGNC Symbol;Acc:HGNC:25827]	ENSG00000176024	79898	HGNC Symbol	ZNF613	protein_coding	7	4.4392	2.3699	3.6315	5.1234	0.00010582	0.0023578	1.3132
mitochondrial ribosomal protein L10 [Source:HGNC Symbol;Acc:HGNC:14055]	ENSG00000159111	124995	HGNC Symbol	MRPL10	protein_coding	7	6.7951	-2.5483	6.5554	-5.1224	0.00010602	0.0023579	1.3114
FtsJ RNA methyltransferase homolog 3 [Source:HGNC Symbol;Acc:HGNC:17136]	ENSG00000108592	117246	HGNC Symbol	FTSJ3	protein_coding	16	6.3706	1.574	6.5822	5.1173	0.00010712	0.0023681	1.3012
general transcription factor IIH subunit 1 [Source:HGNC Symbol;Acc:HGNC:4655]	ENSG00000110768	2965	HGNC Symbol	GTF2H1	protein_coding	16	6.6297	1.285	6.2092	5.1165	0.00010727	0.0023681	1.2998
HD domain containing 3 [Source:HGNC Symbol;Acc:HGNC:30522]	ENSG00000184508	374659	HGNC Symbol	HDDC3	protein_coding	10	2.5947	1.2112	2.7354	5.1175	0.00010706	0.0023681	1.3017
zinc finger MYM-type containing 2 [Source:HGNC Symbol;Acc:HGNC:12989]	ENSG00000121741	7750	HGNC Symbol	ZMYM2	protein_coding	11	5.0733	-2.4146	4.877	-5.1175	0.00010706	0.0023681	1.3017
zinc finger protein 639 [Source:HGNC Symbol;Acc:HGNC:30950]	ENSG00000121864	51193	HGNC Symbol	ZNF639	protein_coding	10	3.6863	-1.1666	3.8127	-5.1125	0.00010813	0.0023825	1.2919
PTC7 protein phosphatase homolog [Source:HGNC Symbol;Acc:HGNC:30695]	ENSG00000196850	160760	HGNC Symbol	PPTC7	protein_coding	2	4.0937	-0.85138	4.2694	-5.1092	0.00010884	0.0023939	1.2854
zinc finger protein 487 [Source:HGNC Symbol;Acc:HGNC:23488]	ENSG00000243660	642819	HGNC Symbol	ZNF487	protein_coding	8	3.3183	-2.3369	2.956	-5.1083	0.00010905	0.0023941	1.2835
malectin [Source:HGNC Symbol;Acc:HGNC:28973]	ENSG00000110917	9761	HGNC Symbol	MLEC	protein_coding	5	4.9256	1.2189	5.2271	5.1048	0.00010981	0.0024064	1.2766
RAB11 family interacting protein 2 [Source:HGNC Symbol;Acc:HGNC:29152]	ENSG00000107560	22841	HGNC Symbol	RAB11FIP2	protein_coding	4	3.2517	-1.5505	3.3499	-5.1012	0.00011059	0.002419	1.2696
zinc finger CCCH-type, RNA binding motif and serine/arginine rich 2 [Source:HGNC Symbol;Acc:HGNC:23019]	ENSG00000169249	8233	HGNC Symbol	ZRSR2	protein_coding	3	4.163	-1.4924	4.2687	-5.0967	0.00011158	0.0024363	1.2607
heterogeneous nuclear ribonucleoprotein H1 [Source:HGNC Symbol;Acc:HGNC:5041]	ENSG00000169045	3187	HGNC Symbol	HNRNPH1	protein_coding	50	8.0881	-1.1369	8.3737	-5.0902	0.00011305	0.0024638	1.2478
thioredoxin domain containing 17 [Source:HGNC Symbol;Acc:HGNC:28218]	ENSG00000129235	84817	HGNC Symbol	TXNDC17	protein_coding	10	5.7854	1.4328	5.597	5.0875	0.00011365	0.0024725	1.2425
defective in cullin neddylation 1 domain containing 3 [Source:HGNC Symbol;Acc:HGNC:28734]	ENSG00000188215	123879	HGNC Symbol	DCUN1D3	protein_coding	2	4.9248	2.5455	4.8204	5.086	0.000114	0.0024756	1.2394
chromosome X open reading frame 40B [Source:HGNC Symbol;Acc:HGNC:17402]	ENSG00000197021	541578	HGNC Symbol	CXorf40B	protein_coding	7	5.3901	0.84999	5.4637	5.0785	0.00011571	0.0025036	1.2247
charged multivesicular body protein 5 [Source:HGNC Symbol;Acc:HGNC:26942]	ENSG00000086065	51510	HGNC Symbol	CHMP5	protein_coding	3	6.7101	0.83971	6.4527	5.0785	0.0001157	0.0025036	1.2248
muscleblind like splicing regulator 3 [Source:HGNC Symbol;Acc:HGNC:20564]	ENSG00000076770	55796	HGNC Symbol	MBNL3	protein_coding	12	3.2924	-1.667	3.0231	-5.0753	0.00011644	0.002515	1.2184
family with sequence similarity 210 member A [Source:HGNC Symbol;Acc:HGNC:28346]	ENSG00000177150	125228	HGNC Symbol	FAM210A	protein_coding	8	4.3403	1.3134	4.2024	5.0737	0.00011683	0.0025187	1.2152
trafficking protein particle complex 10 [Source:HGNC Symbol;Acc:HGNC:11868]	ENSG00000160218	7109	HGNC Symbol	TRAPPC10	protein_coding	12	4.4399	-2.218	4.3643	-5.069	0.00011792	0.0025378	1.2059
protein arginine methyltransferase 5 [Source:HGNC Symbol;Acc:HGNC:10894]	ENSG00000100462	10419	HGNC Symbol	PRMT5	protein_coding	28	5.3265	2.1589	5.3735	5.0658	0.00011869	0.0025458	1.1995
1-acylglycerol-3-phosphate O-acyltransferase 5 [Source:HGNC Symbol;Acc:HGNC:20886]	ENSG00000155189	55326	HGNC Symbol	AGPAT5	protein_coding	7	4.5812	1.9188	4.5563	5.0656	0.00011872	0.0025458	1.1992
heparin binding EGF like growth factor [Source:HGNC Symbol;Acc:HGNC:3059]	ENSG00000113070	1839	HGNC Symbol	HBEGF	protein_coding	3	2.6881	2.0352	2.4558	5.0619	0.00011962	0.0025604	1.1918
serine hydroxymethyltransferase 2 [Source:HGNC Symbol;Acc:HGNC:10852]	ENSG00000182199	6472	HGNC Symbol	SHMT2	protein_coding	35	7.5814	3.0907	7.8639	5.0551	0.00012124	0.0025838	1.1784
ubiquitin C [Source:HGNC Symbol;Acc:HGNC:12468]	ENSG00000150991	7316	HGNC Symbol	UBC	protein_coding	14	11.243	-1.0688	11.261	-5.0546	0.00012136	0.0025838	1.1775
IKAROS family zinc finger 5 [Source:HGNC Symbol;Acc:HGNC:14283]	ENSG00000095574	64376	HGNC Symbol	IKZF5	protein_coding	5	5.3903	-1.304	5.2774	-5.0548	0.00012131	0.0025838	1.1779
proline rich nuclear receptor coactivator 1 [Source:HGNC Symbol;Acc:HGNC:17278]	ENSG00000146278	10957	HGNC Symbol	PNRC1	protein_coding	3	5.1738	-2.3176	5.3885	-5.0531	0.00012172	0.002587	1.1745
solute carrier family 1 member 4 [Source:HGNC Symbol;Acc:HGNC:10942]	ENSG00000115902	6509	HGNC Symbol	SLC1A4	protein_coding	5	4.6659	1.4742	4.2116	5.0493	0.00012266	0.0025931	1.1669
PDX1 C-terminal inhibiting factor 1 [Source:HGNC Symbol;Acc:HGNC:16200]	ENSG00000100982	63935	HGNC Symbol	PCIF1	protein_coding	3	5.6899	-1.4881	5.6885	-5.0494	0.00012264	0.0025931	1.167
acyl-CoA binding domain containing 5 [Source:HGNC Symbol;Acc:HGNC:23338]	ENSG00000107897	91452	HGNC Symbol	ACBD5	protein_coding	8	3.9094	-1.8407	3.5334	-5.0497	0.00012256	0.0025931	1.1677
jumonji domain containing 1C [Source:HGNC Symbol;Acc:HGNC:12313]	ENSG00000171988	221037	HGNC Symbol	JMJD1C	protein_coding	12	5.7231	-2.4895	5.4669	-5.0482	0.00012293	0.0025943	1.1647
EPB41L4A antisense RNA 1 [Source:HGNC Symbol;Acc:HGNC:30749]	ENSG00000224032	NA	HGNC Symbol	EPB41L4A-AS1	lincRNA	4	3.4083	-1.5518	3.0618	-5.0455	0.0001236	0.0025992	1.1594
ral guanine nucleotide dissociation stimulator like 4 [Source:HGNC Symbol;Acc:HGNC:31911]	ENSG00000159496	266747	HGNC Symbol	RGL4	protein_coding	10	3.145	-2.7422	2.4148	-5.0462	0.00012343	0.0025992	1.1607
pseudouridine 5'-phosphatase [Source:HGNC Symbol;Acc:HGNC:16818]	ENSG00000130021	8226	HGNC Symbol	PUDP	protein_coding	6	4.7533	1.9208	4.4891	5.0423	0.00012439	0.0026114	1.153
Kruppel like factor 12 [Source:HGNC Symbol;Acc:HGNC:6346]	ENSG00000118922	11278	HGNC Symbol	KLF12	protein_coding	2	4.6569	-2.8988	4.4229	-5.0385	0.00012533	0.0026265	1.1455
SEC14 and spectrin domain containing 1 [Source:HGNC Symbol;Acc:HGNC:18379]	ENSG00000187231	91404	HGNC Symbol	SESTD1	protein_coding	9	2.6775	-1.8507	2.1458	-5.0275	0.00012812	0.0026803	1.1237
solute carrier family 35 member B4 [Source:HGNC Symbol;Acc:HGNC:20584]	ENSG00000205060	84912	HGNC Symbol	SLC35B4	protein_coding	4	4.5582	1.0575	4.298	5.0236	0.00012913	0.0026966	1.116
ergosterol biosynthesis 28 homolog [Source:HGNC Symbol;Acc:HGNC:1187]	ENSG00000133935	11161	HGNC Symbol	ERG28	protein_coding	1	6.8584	1.0372	6.8949	5.0156	0.0001312	0.0027297	1.1002
transmembrane protein 128 [Source:HGNC Symbol;Acc:HGNC:28201]	ENSG00000132406	85013	HGNC Symbol	TMEM128	protein_coding	2	3.9335	0.94738	3.7883	5.0149	0.00013138	0.0027297	1.0988
RNA polymerase II subunit A [Source:HGNC Symbol;Acc:HGNC:9187]	ENSG00000181222	5430	HGNC Symbol	POLR2A	protein_coding	9	4.7989	-1.3057	4.7672	-5.014	0.00013162	0.0027297	1.097
sestrin 1 [Source:HGNC Symbol;Acc:HGNC:21595]	ENSG00000080546	27244	HGNC Symbol	SESN1	protein_coding	7	4.3215	-3.1261	3.618	-5.014	0.00013162	0.0027297	1.097
small nuclear ribonucleoprotein polypeptide G [Source:HGNC Symbol;Acc:HGNC:11163]	ENSG00000143977	6637	HGNC Symbol	SNRPG	protein_coding	9	7.7724	1.6657	7.5856	5.0053	0.00013395	0.0027731	1.0796
Ras association domain family member 8 [Source:HGNC Symbol;Acc:HGNC:13232]	ENSG00000123094	11228	HGNC Symbol	RASSF8	protein_coding	16	1.9941	1.758	1.2882	5.0031	0.00013452	0.0027754	1.0754
lactamase beta [Source:HGNC Symbol;Acc:HGNC:16468]	ENSG00000103642	114294	HGNC Symbol	LACTB	protein_coding	4	3.6555	0.83302	3.573	5.0033	0.00013448	0.0027754	1.0757
chromobox 5 [Source:HGNC Symbol;Acc:HGNC:1555]	ENSG00000094916	23468	HGNC Symbol	CBX5	protein_coding	6	7.5994	1.8845	7.4569	5.0011	0.00013507	0.0027819	1.0714
polyglutamine binding protein 1 [Source:HGNC Symbol;Acc:HGNC:9330]	ENSG00000102103	10084	HGNC Symbol	PQBP1	protein_coding	18	6.1723	0.85641	6.3331	4.9982	0.00013586	0.0027934	1.0656
chromosome 3 open reading frame 38 [Source:HGNC Symbol;Acc:HGNC:28384]	ENSG00000179021	285237	HGNC Symbol	C3orf38	protein_coding	4	6.1999	-1.0862	5.9804	-4.9958	0.0001365	0.0028017	1.061
histone cluster 1 H2A family member c [Source:HGNC Symbol;Acc:HGNC:4733]	ENSG00000180573	8334	HGNC Symbol	HIST1H2AC	protein_coding	3	3.4103	-2.5455	3.1215	-4.9919	0.00013758	0.0028191	1.0531
transmembrane protein 167A [Source:HGNC Symbol;Acc:HGNC:28330]	ENSG00000174695	153339	HGNC Symbol	TMEM167A	protein_coding	6	6.6225	1.9273	6.6798	4.9887	0.00013845	0.0028322	1.0469
chromosome 16 open reading frame 91 [Source:HGNC Symbol;Acc:HGNC:27558]	ENSG00000174109	283951	HGNC Symbol	C16orf91	protein_coding	2	2.2924	1.3934	2.5325	4.9877	0.00013875	0.0028323	1.0448
transmembrane and coiled-coil domains 1 [Source:HGNC Symbol;Acc:HGNC:18188]	ENSG00000143183	54499	HGNC Symbol	TMCO1	protein_coding	9	8.0142	0.99844	7.9052	4.987	0.00013893	0.0028323	1.0434
A-kinase anchoring protein 1 [Source:HGNC Symbol;Acc:HGNC:367]	ENSG00000121057	8165	HGNC Symbol	AKAP1	protein_coding	19	4.0579	1.0218	3.6832	4.9857	0.00013931	0.0028351	1.0408
cathepsin C [Source:HGNC Symbol;Acc:HGNC:2528]	ENSG00000109861	1075	HGNC Symbol	CTSC	protein_coding	9	9.6107	1.1352	9.572	4.9845	0.00013964	0.0028371	1.0384
serine and arginine rich splicing factor 9 [Source:HGNC Symbol;Acc:HGNC:10791]	ENSG00000111786	8683	HGNC Symbol	SRSF9	protein_coding	6	3.7853	-1.1463	3.9729	-4.9811	0.0001406	0.0028422	1.0316
HAUS augmin like complex subunit 3 [Source:HGNC Symbol;Acc:HGNC:28719]	ENSG00000214367	79441	HGNC Symbol	HAUS3	protein_coding	5	3.9294	-1.2949	3.789	-4.9824	0.00014021	0.0028422	1.0344
mevalonate diphosphate decarboxylase [Source:HGNC Symbol;Acc:HGNC:7529]	ENSG00000167508	4597	HGNC Symbol	MVD	protein_coding	17	3.2128	-1.6887	3.143	-4.981	0.00014061	0.0028422	1.0316
poly(U) binding splicing factor 60 [Source:HGNC Symbol;Acc:HGNC:17042]	ENSG00000179950	22827	HGNC Symbol	PUF60	protein_coding	22	6.1563	1.0734	6.4789	4.9795	0.00014104	0.0028426	1.0285
RNA binding motif protein 39 [Source:HGNC Symbol;Acc:HGNC:15923]	ENSG00000131051	9584	HGNC Symbol	RBM39	protein_coding	45	8.9915	-1.3105	9.1394	-4.9785	0.00014133	0.0028426	1.0265
family with sequence similarity 214 member A [Source:HGNC Symbol;Acc:HGNC:25609]	ENSG00000047346	56204	HGNC Symbol	FAM214A	protein_coding	16	4.4667	-2.5452	3.9827	-4.9789	0.00014122	0.0028426	1.0272
cardiolipin synthase 1 [Source:HGNC Symbol;Acc:HGNC:16148]	ENSG00000088766	54675	HGNC Symbol	CRLS1	protein_coding	7	3.0972	0.91139	2.9797	4.9748	0.00014236	0.0028537	1.0193
dehydrodolichyl diphosphate synthase subunit [Source:HGNC Symbol;Acc:HGNC:20603]	ENSG00000117682	79947	HGNC Symbol	DHDDS	protein_coding	25	5.4674	0.75999	5.3649	4.9753	0.00014222	0.0028537	1.0202
solute carrier family 7 member 1 [Source:HGNC Symbol;Acc:HGNC:11057]	ENSG00000139514	6541	HGNC Symbol	SLC7A1	protein_coding	3	4.376	3.3908	4.6342	4.9695	0.00014388	0.0028643	1.0087
chaperonin containing TCP1 subunit 5 [Source:HGNC Symbol;Acc:HGNC:1618]	ENSG00000150753	22948	HGNC Symbol	CCT5	protein_coding	15	8.8963	2.17	9.0981	4.9708	0.00014352	0.0028643	1.0113
GDP-mannose pyrophosphorylase A [Source:HGNC Symbol;Acc:HGNC:22923]	ENSG00000144591	29926	HGNC Symbol	GMPPA	protein_coding	14	4.8752	1.2963	5.2	4.9709	0.00014349	0.0028643	1.0114
RAB3A interacting protein [Source:HGNC Symbol;Acc:HGNC:16508]	ENSG00000127328	117177	HGNC Symbol	RAB3IP	protein_coding	18	4.5486	1.1572	4.1846	4.9679	0.00014435	0.0028643	1.0055
iron-sulfur cluster assembly 1 [Source:HGNC Symbol;Acc:HGNC:28660]	ENSG00000135070	81689	HGNC Symbol	ISCA1	protein_coding	4	4.5392	-1.3854	4.3042	-4.9672	0.00014456	0.0028643	1.0041
autophagy related 16 like 1 [Source:HGNC Symbol;Acc:HGNC:21498]	ENSG00000085978	55054	HGNC Symbol	ATG16L1	protein_coding	18	5.1005	-1.8072	4.7562	-4.9688	0.0001441	0.0028643	1.0073
G protein-coupled receptor 18 [Source:HGNC Symbol;Acc:HGNC:4472]	ENSG00000125245	2841	HGNC Symbol	GPR18	protein_coding	4	4.9902	-2.0513	4.0621	-4.9672	0.00014456	0.0028643	1.0041
solute carrier organic anion transporter family member 4A1 [Source:HGNC Symbol;Acc:HGNC:10953]	ENSG00000101187	28231	HGNC Symbol	SLCO4A1	protein_coding	9	1.4115	2.6089	1.0027	4.9649	0.00014522	0.0028726	0.99954
DEAD-box helicase 20 [Source:HGNC Symbol;Acc:HGNC:2743]	ENSG00000064703	11218	HGNC Symbol	DDX20	protein_coding	5	3.7249	-1.3703	3.2881	-4.9631	0.00014577	0.0028786	0.99585
protein phosphatase, Mg2+/Mn2+ dependent 1K [Source:HGNC Symbol;Acc:HGNC:25415]	ENSG00000163644	152926	HGNC Symbol	PPM1K	protein_coding	10	6.3935	1.0398	6.3301	4.9614	0.00014626	0.0028799	0.99251
FOS like 2, AP-1 transcription factor subunit [Source:HGNC Symbol;Acc:HGNC:3798]	ENSG00000075426	2355	HGNC Symbol	FOSL2	protein_coding	4	4.5056	-3.202	4.3274	-4.9612	0.00014631	0.0028799	0.99214
protein kinase C beta [Source:HGNC Symbol;Acc:HGNC:9395]	ENSG00000166501	5579	HGNC Symbol	PRKCB	protein_coding	14	7.253	-1.3681	7.2508	-4.9598	0.00014672	0.0028831	0.98943
STT3A, catalytic subunit of the oligosaccharyltransferase complex [Source:HGNC Symbol;Acc:HGNC:6172]	ENSG00000134910	3703	HGNC Symbol	STT3A	protein_coding	17	8.2756	2.2896	8.5429	4.9543	0.00014835	0.0029105	0.97842
brain expressed X-linked 2 [Source:HGNC Symbol;Acc:HGNC:30933]	ENSG00000133134	84707	HGNC Symbol	BEX2	protein_coding	4	4.0399	-2.1346	3.902	-4.951	0.00014935	0.0029227	0.97179
zinc finger protein 821 [Source:HGNC Symbol;Acc:HGNC:28043]	ENSG00000102984	55565	HGNC Symbol	ZNF821	protein_coding	21	1.8931	-2.5534	1.2723	-4.9506	0.00014946	0.0029227	0.97106
NOC3 like DNA replication regulator [Source:HGNC Symbol;Acc:HGNC:24034]	ENSG00000173145	64318	HGNC Symbol	NOC3L	protein_coding	3	5.1027	1.2978	5.1282	4.9487	0.00015004	0.0029291	0.96724
chromosome 21 open reading frame 91 [Source:HGNC Symbol;Acc:HGNC:16459]	ENSG00000154642	54149	HGNC Symbol	C21orf91	protein_coding	6	5.3001	1.3023	5.3513	4.9475	0.00015038	0.0029311	0.96497
C-C motif chemokine receptor 5 (gene/pseudogene) [Source:HGNC Symbol;Acc:HGNC:1606]	ENSG00000160791	1234	HGNC Symbol	CCR5	protein_coding	2	4.0939	5.5798	3.7469	4.9453	0.00015107	0.0029334	0.96047
proteasome subunit alpha 4 [Source:HGNC Symbol;Acc:HGNC:9533]	ENSG00000041357	5685	HGNC Symbol	PSMA4	protein_coding	21	9.0595	1.357	9.056	4.9442	0.00015138	0.0029334	0.95838
COP9 signalosome subunit 7A [Source:HGNC Symbol;Acc:HGNC:16758]	ENSG00000111652	50813	HGNC Symbol	COPS7A	protein_coding	22	5.7542	0.79409	5.8541	4.9439	0.00015148	0.0029334	0.95777
novel transcript	ENSG00000270195	NA	Clone-based (Ensembl) gene	AC016773.1	lincRNA	2	1.4956	-2.5013	1.3266	-4.9461	0.00015081	0.0029334	0.96218
zinc and ring finger 1 [Source:HGNC Symbol;Acc:HGNC:18452]	ENSG00000186187	84937	HGNC Symbol	ZNRF1	protein_coding	11	3.3386	3.1327	3.7265	4.94	0.00015267	0.0029427	0.95003
mitochondrial ribosomal protein L18 [Source:HGNC Symbol;Acc:HGNC:14477]	ENSG00000112110	29074	HGNC Symbol	MRPL18	protein_coding	4	6.7888	1.2316	6.6643	4.94	0.00015268	0.0029427	0.94992
TBC1 domain family member 24 [Source:HGNC Symbol;Acc:HGNC:29203]	ENSG00000162065	57465	HGNC Symbol	TBC1D24	protein_coding	11	4.0754	1.1832	3.8483	4.9399	0.0001527	0.0029427	0.94984
bone marrow stromal cell antigen 2 [Source:HGNC Symbol;Acc:HGNC:1119]	ENSG00000130303	684	HGNC Symbol	BST2	protein_coding	3	6.7979	1.1706	7.0482	4.9379	0.00015333	0.0029502	0.94574
CD40 molecule [Source:HGNC Symbol;Acc:HGNC:11919]	ENSG00000101017	958	HGNC Symbol	CD40	protein_coding	7	3.9936	1.6511	4.3201	4.9363	0.00015383	0.0029551	0.9425
coiled-coil domain containing 167 [Source:HGNC Symbol;Acc:HGNC:21239]	ENSG00000198937	154467	HGNC Symbol	CCDC167	protein_coding	1	6.5484	1.3328	6.5762	4.9332	0.00015478	0.0029686	0.93639
tripartite motif containing 33 [Source:HGNC Symbol;Acc:HGNC:16290]	ENSG00000197323	51592	HGNC Symbol	TRIM33	protein_coding	6	5.5128	-1.5968	5.3388	-4.9309	0.00015549	0.0029726	0.93188
family with sequence similarity 199, X-linked [Source:HGNC Symbol;Acc:HGNC:25195]	ENSG00000123575	139231	HGNC Symbol	FAM199X	protein_coding	2	3.4488	-1.6051	3.4903	-4.9314	0.00015534	0.0029726	0.93281
amphiregulin [Source:HGNC Symbol;Acc:HGNC:651]	ENSG00000109321	374	HGNC Symbol	AREG	protein_coding	3	4.8016	2.2142	5.1003	4.9288	0.00015614	0.0029757	0.92771
NADH:ubiquinone oxidoreductase complex assembly factor 3 [Source:HGNC Symbol;Acc:HGNC:29918]	ENSG00000178057	25915	HGNC Symbol	NDUFAF3	protein_coding	6	5.2144	1.6225	5.5818	4.9291	0.00015606	0.0029757	0.92824
succinate-CoA ligase ADP-forming beta subunit [Source:HGNC Symbol;Acc:HGNC:11448]	ENSG00000136143	8803	HGNC Symbol	SUCLA2	protein_coding	21	5.9606	1.0036	5.9101	4.9262	0.00015696	0.0029866	0.92252
ribonuclease H2 subunit A [Source:HGNC Symbol;Acc:HGNC:18518]	ENSG00000104889	10535	HGNC Symbol	RNASEH2A	protein_coding	6	4.4764	1.1622	4.3223	4.9222	0.00015824	0.003006	0.91452
RAB27A, member RAS oncogene family [Source:HGNC Symbol;Acc:HGNC:9766]	ENSG00000069974	5873	HGNC Symbol	RAB27A	protein_coding	12	6.9365	1.8762	7.2847	4.9209	0.00015864	0.0030089	0.91198
novel transcript	ENSG00000267519	NA	Clone-based (Ensembl) gene	AC020916.1	antisense	1	5.7439	-2.0917	6.2256	-4.9125	0.00016135	0.0030555	0.8952
ARP3 actin related protein 3 homolog [Source:HGNC Symbol;Acc:HGNC:170]	ENSG00000115091	10096	HGNC Symbol	ACTR3	protein_coding	8	7.8748	1.3081	7.9334	4.9116	0.00016165	0.0030562	0.89341
N(alpha)-acetyltransferase 10, NatA catalytic subunit [Source:HGNC Symbol;Acc:HGNC:18704]	ENSG00000102030	8260	HGNC Symbol	NAA10	protein_coding	16	3.2217	0.95023	3.5464	4.9105	0.000162	0.003058	0.89126
SIK family kinase 3 [Source:HGNC Symbol;Acc:HGNC:29165]	ENSG00000160584	23387	HGNC Symbol	SIK3	protein_coding	13	4.0818	-1.5344	3.7965	-4.9092	0.00016244	0.0030615	0.88857
FGGY carbohydrate kinase domain containing [Source:HGNC Symbol;Acc:HGNC:25610]	ENSG00000172456	55277	HGNC Symbol	FGGY	protein_coding	25	3.2067	-1.8352	2.7682	-4.906	0.00016348	0.0030764	0.88222
human immunodeficiency virus type I enhancer binding protein 2 [Source:HGNC Symbol;Acc:HGNC:4921]	ENSG00000010818	3097	HGNC Symbol	HIVEP2	protein_coding	5	4.1189	1.5094	4.3311	4.8977	0.00016624	0.0031234	0.86563
dual specificity phosphatase 14 [Source:HGNC Symbol;Acc:HGNC:17007]	ENSG00000276023	11072	HGNC Symbol	DUSP14	protein_coding	3	5.2527	1.6844	4.9462	4.8945	0.0001673	0.0031286	0.85934
nuclear transcription factor Y subunit beta [Source:HGNC Symbol;Acc:HGNC:7805]	ENSG00000120837	4801	HGNC Symbol	NFYB	protein_coding	5	5.8084	1.0249	5.8091	4.8946	0.00016729	0.0031286	0.85938
decapping exoribonuclease [Source:HGNC Symbol;Acc:HGNC:2992]	ENSG00000204348	1797	HGNC Symbol	DXO	protein_coding	15	2.4358	-1.7574	2.771	-4.8951	0.00016712	0.0031286	0.86044
RNA polymerase III subunit E [Source:HGNC Symbol;Acc:HGNC:30347]	ENSG00000058600	55718	HGNC Symbol	POLR3E	protein_coding	19	5.1981	-1.4622	5.4093	-4.8933	0.00016774	0.0031319	0.85677
E2F transcription factor 4 [Source:HGNC Symbol;Acc:HGNC:3118]	ENSG00000205250	1874	HGNC Symbol	E2F4	protein_coding	13	4.7133	0.92172	4.8947	4.8887	0.00016928	0.0031558	0.84769
exosome component 2 [Source:HGNC Symbol;Acc:HGNC:17097]	ENSG00000130713	23404	HGNC Symbol	EXOSC2	protein_coding	11	6.2714	1.639	6.4489	4.8864	0.00017006	0.0031654	0.84313
RNA, 7SL, cytoplasmic 2 [Source:HGNC Symbol;Acc:HGNC:23134]	ENSG00000274012	NA	HGNC Symbol	RN7SL2	misc_RNA	1	3.1185	-1.3063	2.9819	-4.8828	0.0001713	0.0031835	0.83596
dCTP pyrophosphatase 1 [Source:HGNC Symbol;Acc:HGNC:28777]	ENSG00000179958	79077	HGNC Symbol	DCTPP1	protein_coding	5	5.1729	2.8701	5.5046	4.8801	0.00017224	0.003196	0.83053
diphthamide biosynthesis 3 [Source:HGNC Symbol;Acc:HGNC:27717]	ENSG00000154813	285381	HGNC Symbol	DPH3	protein_coding	4	6.6008	1.0634	6.8465	4.8759	0.00017369	0.003213	0.82221
platelet and endothelial cell adhesion molecule 1 [Source:HGNC Symbol;Acc:HGNC:8823]	ENSG00000261371	5175	HGNC Symbol	PECAM1	protein_coding	9	6.032	-3.0908	5.1371	-4.8763	0.00017357	0.003213	0.82288
lipopolysaccharide induced TNF factor [Source:HGNC Symbol;Acc:HGNC:16841]	ENSG00000189067	9516	HGNC Symbol	LITAF	protein_coding	21	9.5842	-1.6469	9.7718	-4.8723	0.00017497	0.0032317	0.81494
NIMA related kinase 3 [Source:HGNC Symbol;Acc:HGNC:7746]	ENSG00000136098	4752	HGNC Symbol	NEK3	protein_coding	11	2.1303	-2.0723	1.8948	-4.8712	0.00017536	0.0032339	0.81273
minichromosome maintenance complex component 3 [Source:HGNC Symbol;Acc:HGNC:6945]	ENSG00000112118	4172	HGNC Symbol	MCM3	protein_coding	6	7.8757	1.7897	7.8152	4.869	0.00017614	0.0032387	0.80837
Yip1 domain family member 5 [Source:HGNC Symbol;Acc:HGNC:24877]	ENSG00000145817	81555	HGNC Symbol	YIPF5	protein_coding	6	6.7958	0.98367	6.7272	4.869	0.00017616	0.0032387	0.80824
zinc finger CCHC-type containing 7 [Source:HGNC Symbol;Acc:HGNC:26209]	ENSG00000147905	84186	HGNC Symbol	ZCCHC7	protein_coding	9	5.3461	-1.0216	5.3423	-4.8663	0.00017712	0.0032464	0.80284
insulin induced gene 1 [Source:HGNC Symbol;Acc:HGNC:6083]	ENSG00000186480	3638	HGNC Symbol	INSIG1	protein_coding	6	4.4661	-1.0367	4.5985	-4.8664	0.00017707	0.0032464	0.80314
tRNA splicing endonuclease subunit 54 [Source:HGNC Symbol;Acc:HGNC:27561]	ENSG00000182173	283989	HGNC Symbol	TSEN54	protein_coding	11	3.9904	-2.7087	3.6967	-4.8645	0.00017774	0.0032527	0.79941
zinc finger protein 18 [Source:HGNC Symbol;Acc:HGNC:12969]	ENSG00000154957	7566	HGNC Symbol	ZNF18	protein_coding	7	4.428	-1.9097	4.0618	-4.8636	0.00017808	0.0032541	0.79749
zinc finger protein 140 [Source:HGNC Symbol;Acc:HGNC:12925]	ENSG00000196387	7699	HGNC Symbol	ZNF140	protein_coding	10	3.9677	1.1949	3.6779	4.8617	0.00017877	0.0032542	0.79367
angio associated migratory cell protein [Source:HGNC Symbol;Acc:HGNC:18]	ENSG00000127837	14	HGNC Symbol	AAMP	protein_coding	10	6.0994	0.96683	6.3065	4.8627	0.0001784	0.0032542	0.79572
death inducer-obliterator 1 [Source:HGNC Symbol;Acc:HGNC:2680]	ENSG00000101191	11083	HGNC Symbol	DIDO1	protein_coding	7	4.3632	-1.6227	4.4646	-4.8613	0.0001789	0.0032542	0.79293
Fas apoptotic inhibitory molecule [Source:HGNC Symbol;Acc:HGNC:18703]	ENSG00000158234	55179	HGNC Symbol	FAIM	protein_coding	9	4.5211	0.95013	4.1564	4.8592	0.00017965	0.0032579	0.7888
kelch like family member 28 [Source:HGNC Symbol;Acc:HGNC:19741]	ENSG00000179454	54813	HGNC Symbol	KLHL28	protein_coding	7	6.6819	-1.2783	6.6272	-4.8592	0.00017964	0.0032579	0.78885
gypsy retrotransposon integrase 1 [Source:HGNC Symbol;Acc:HGNC:25959]	ENSG00000145723	54826	HGNC Symbol	GIN1	protein_coding	7	3.8187	1.5106	3.4373	4.8583	0.00017998	0.0032589	0.78699
high mobility group nucleosome binding domain 1 [Source:HGNC Symbol;Acc:HGNC:4984]	ENSG00000205581	3150	HGNC Symbol	HMGN1	protein_coding	21	5.3645	-0.89513	5.3603	-4.8538	0.00018163	0.0032593	0.77797
RNA polymerase I and III subunit D [Source:HGNC Symbol;Acc:HGNC:20422]	ENSG00000186184	51082	HGNC Symbol	POLR1D	protein_coding	24	6.1463	-0.94626	5.9713	-4.8559	0.00018086	0.0032593	0.78218
BCL2 associated transcription factor 1 [Source:HGNC Symbol;Acc:HGNC:16863]	ENSG00000029363	9774	HGNC Symbol	BCLAF1	protein_coding	24	7.9689	-1.0147	8.2187	-4.8574	0.0001803	0.0032593	0.78523
DEAH-box helicase 38 [Source:HGNC Symbol;Acc:HGNC:17211]	ENSG00000140829	9785	HGNC Symbol	DHX38	protein_coding	14	4.0871	-1.0706	4.3824	-4.8546	0.00018134	0.0032593	0.77956
kelch like family member 15 [Source:HGNC Symbol;Acc:HGNC:29347]	ENSG00000174010	80311	HGNC Symbol	KLHL15	protein_coding	1	2.1023	-1.3141	2.0407	-4.8538	0.00018163	0.0032593	0.77793
TSPY like 4 [Source:HGNC Symbol;Acc:HGNC:21559]	ENSG00000187189	23270	HGNC Symbol	TSPYL4	protein_coding	1	2.1111	-1.8586	2.5335	-4.8542	0.0001815	0.0032593	0.77867
radixin [Source:HGNC Symbol;Acc:HGNC:9944]	ENSG00000137710	5962	HGNC Symbol	RDX	protein_coding	24	5.8371	1.5966	5.6837	4.8508	0.00018274	0.0032707	0.77189
sperm antigen with calponin homology and coiled-coil domains 1 like [Source:HGNC Symbol;Acc:HGNC:29022]	ENSG00000100014	23384	HGNC Symbol	SPECC1L	protein_coding	8	2.2214	1.3063	2.3145	4.8506	0.00018281	0.0032707	0.77152
proliferating cell nuclear antigen [Source:HGNC Symbol;Acc:HGNC:8729]	ENSG00000132646	5111	HGNC Symbol	PCNA	protein_coding	2	7.6902	1.807	7.2626	4.8491	0.00018337	0.0032719	0.7685
zinc finger protein 34 [Source:HGNC Symbol;Acc:HGNC:13098]	ENSG00000196378	80778	HGNC Symbol	ZNF34	protein_coding	5	2.9627	-2.1301	3.1526	-4.8489	0.00018343	0.0032719	0.7682
receptor accessory protein 5 [Source:HGNC Symbol;Acc:HGNC:30077]	ENSG00000129625	7905	HGNC Symbol	REEP5	protein_coding	7	7.9167	0.77429	7.8214	4.8469	0.00018418	0.0032806	0.76411
solute carrier family 16 member 1 [Source:HGNC Symbol;Acc:HGNC:10922]	ENSG00000155380	6566	HGNC Symbol	SLC16A1	protein_coding	7	4.7582	2.4902	4.949	4.8375	0.0001877	0.0033333	0.74537
ubiquinol-cytochrome c reductase complex assembly factor 1 [Source:HGNC Symbol;Acc:HGNC:15891]	ENSG00000101019	55245	HGNC Symbol	UQCC1	protein_coding	23	5.9175	1.0048	5.8318	4.8377	0.00018765	0.0033333	0.74567
JAZF zinc finger 1 [Source:HGNC Symbol;Acc:HGNC:28917]	ENSG00000153814	221895	HGNC Symbol	JAZF1	protein_coding	9	4.473	-1.1888	4.7176	-4.8358	0.00018835	0.0033398	0.74198
DNA ligase 4 [Source:HGNC Symbol;Acc:HGNC:6601]	ENSG00000174405	3981	HGNC Symbol	LIG4	protein_coding	5	3.3442	1.8181	3.2695	4.8317	0.00018992	0.0033628	0.73374
ubiquitin conjugating enzyme E2 T [Source:HGNC Symbol;Acc:HGNC:25009]	ENSG00000077152	29089	HGNC Symbol	UBE2T	protein_coding	6	4.5759	2.8162	3.8214	4.819	0.00019485	0.0034236	0.70839
Yip1 interacting factor homolog A, membrane trafficking protein [Source:HGNC Symbol;Acc:HGNC:16688]	ENSG00000174851	10897	HGNC Symbol	YIF1A	protein_coding	13	3.8114	1.8986	4.2752	4.8196	0.00019464	0.0034236	0.70946
adenylosuccinate lyase [Source:HGNC Symbol;Acc:HGNC:291]	ENSG00000239900	158	HGNC Symbol	ADSL	protein_coding	23	7.5977	1.6093	7.5786	4.8185	0.00019507	0.0034236	0.70725
mitochondrial ribosomal protein S33 [Source:HGNC Symbol;Acc:HGNC:16634]	ENSG00000090263	51650	HGNC Symbol	MRPS33	protein_coding	9	5.9936	1.4215	5.7017	4.8212	0.00019398	0.0034236	0.71279
NGG1 interacting factor 3 like 1 [Source:HGNC Symbol;Acc:HGNC:13390]	ENSG00000196290	60491	HGNC Symbol	NIF3L1	protein_coding	10	5.6472	1.2825	5.2284	4.8188	0.00019493	0.0034236	0.70799
protein phosphatase, Mg2+/Mn2+ dependent 1A [Source:HGNC Symbol;Acc:HGNC:9275]	ENSG00000100614	5494	HGNC Symbol	PPM1A	protein_coding	8	6.0442	-1.5223	5.9558	-4.8204	0.00019433	0.0034236	0.71104
trafficking protein particle complex 3 [Source:HGNC Symbol;Acc:HGNC:19942]	ENSG00000054116	27095	HGNC Symbol	TRAPPC3	protein_coding	10	5.4841	0.92527	5.2304	4.809	0.00019883	0.0034794	0.68833
cyclin dependent kinase inhibitor 2D [Source:HGNC Symbol;Acc:HGNC:1790]	ENSG00000129355	1032	HGNC Symbol	CDKN2D	protein_coding	2	3.1947	-3.3614	2.8717	-4.8093	0.00019875	0.0034794	0.68877
mitochondrial ribosomal protein S28 [Source:HGNC Symbol;Acc:HGNC:14513]	ENSG00000147586	28957	HGNC Symbol	MRPS28	protein_coding	9	2.9661	1.3852	2.9728	4.8062	0.00019999	0.0034946	0.68258
RAS like proto-oncogene A [Source:HGNC Symbol;Acc:HGNC:9839]	ENSG00000006451	5898	HGNC Symbol	RALA	protein_coding	5	4.3164	1.6131	4.2996	4.8028	0.00020137	0.0035002	0.67577
CDGSH iron sulfur domain 1 [Source:HGNC Symbol;Acc:HGNC:30880]	ENSG00000122873	55847	HGNC Symbol	CISD1	protein_coding	4	5.4087	1.6045	5.4083	4.8031	0.00020125	0.0035002	0.67637
zinc finger protein 326 [Source:HGNC Symbol;Acc:HGNC:14104]	ENSG00000162664	284695	HGNC Symbol	ZNF326	protein_coding	4	5.5201	-0.97174	5.2604	-4.8025	0.00020148	0.0035002	0.67524
DIS3 like 3'-5' exoribonuclease 2 [Source:HGNC Symbol;Acc:HGNC:28648]	ENSG00000144535	129563	HGNC Symbol	DIS3L2	protein_coding	16	3.6992	-1.0273	3.5343	-4.8035	0.00020106	0.0035002	0.67729
striatin interacting protein 1 [Source:HGNC Symbol;Acc:HGNC:25916]	ENSG00000143093	85369	HGNC Symbol	STRIP1	protein_coding	9	5.3294	-1.2014	5.1284	-4.8004	0.00020233	0.0035099	0.67106
family with sequence similarity 206 member A [Source:HGNC Symbol;Acc:HGNC:1364]	ENSG00000119328	54942	HGNC Symbol	FAM206A	protein_coding	4	4.0518	1.0355	3.8612	4.7992	0.00020284	0.0035136	0.66859
solute carrier family 43 member 3 [Source:HGNC Symbol;Acc:HGNC:17466]	ENSG00000134802	29015	HGNC Symbol	SLC43A3	protein_coding	26	4.2763	3.31	4.2199	4.797	0.00020375	0.0035193	0.66412
adenosylhomocysteinase [Source:HGNC Symbol;Acc:HGNC:343]	ENSG00000101444	191	HGNC Symbol	AHCY	protein_coding	6	5.7219	1.6912	5.6477	4.7975	0.00020352	0.0035193	0.66526
microtubule affinity regulating kinase 3 [Source:HGNC Symbol;Acc:HGNC:6897]	ENSG00000075413	4140	HGNC Symbol	MARK3	protein_coding	26	5.3303	-1.1809	5.3577	-4.7936	0.00020513	0.0035379	0.65747
EMG1, N1-specific pseudouridine methyltransferase [Source:HGNC Symbol;Acc:HGNC:16912]	ENSG00000126749	10436	HGNC Symbol	EMG1	protein_coding	6	3.9232	1.1549	4.0989	4.7899	0.00020668	0.0035544	0.65002
PHD finger protein 1 [Source:HGNC Symbol;Acc:HGNC:8919]	ENSG00000112511	5252	HGNC Symbol	PHF1	protein_coding	11	2.556	-1.6894	2.8422	-4.7906	0.0002064	0.0035544	0.65136
adducin 3 [Source:HGNC Symbol;Acc:HGNC:245]	ENSG00000148700	120	HGNC Symbol	ADD3	protein_coding	20	7.0728	-2.6653	6.5781	-4.7869	0.00020795	0.0035712	0.64395
destrin, actin depolymerizing factor [Source:HGNC Symbol;Acc:HGNC:15750]	ENSG00000125868	11034	HGNC Symbol	DSTN	protein_coding	3	6.7335	-1.0296	6.7088	-4.7838	0.00020928	0.0035889	0.63764
ubiquinol-cytochrome c reductase complex assembly factor 2 [Source:HGNC Symbol;Acc:HGNC:21237]	ENSG00000137288	84300	HGNC Symbol	UQCC2	protein_coding	4	6.1417	1.5547	6.1303	4.7794	0.00021113	0.0036094	0.62891
amyloid beta precursor like protein 2 [Source:HGNC Symbol;Acc:HGNC:598]	ENSG00000084234	334	HGNC Symbol	APLP2	protein_coding	26	5.1865	-1.4626	5.1666	-4.7794	0.00021113	0.0036094	0.62893
zinc finger protein 250 [Source:HGNC Symbol;Acc:HGNC:13044]	ENSG00000196150	58500	HGNC Symbol	ZNF250	protein_coding	10	4.6832	-1.6133	4.6799	-4.7788	0.00021138	0.0036094	0.62776
zw10 kinetochore protein [Source:HGNC Symbol;Acc:HGNC:13194]	ENSG00000086827	9183	HGNC Symbol	ZW10	protein_coding	3	4.9946	1.5776	4.8156	4.7775	0.00021195	0.003614	0.62508
CDGSH iron sulfur domain 2 [Source:HGNC Symbol;Acc:HGNC:24212]	ENSG00000145354	493856	HGNC Symbol	CISD2	protein_coding	5	5.4219	1.4207	5.3293	4.7764	0.0002124	0.0036165	0.62298
interferon induced protein with tetratricopeptide repeats 5 [Source:HGNC Symbol;Acc:HGNC:13328]	ENSG00000152778	24138	HGNC Symbol	IFIT5	protein_coding	1	3.407	-1.7337	3.2932	-4.7751	0.00021299	0.0036214	0.62024
enhancer of polycomb homolog 1 [Source:HGNC Symbol;Acc:HGNC:19876]	ENSG00000120616	80314	HGNC Symbol	EPC1	protein_coding	10	5.592	-1.8206	5.5462	-4.7738	0.00021354	0.0036257	0.61767
tRNA methyltransferase 10A [Source:HGNC Symbol;Acc:HGNC:28403]	ENSG00000145331	93587	HGNC Symbol	TRMT10A	protein_coding	7	3.1151	1.047	2.8096	4.7706	0.00021492	0.0036336	0.61133
tRNA methyltransferase 13 homolog [Source:HGNC Symbol;Acc:HGNC:25502]	ENSG00000122435	54482	HGNC Symbol	TRMT13	protein_coding	5	4.6038	0.85605	4.6109	4.7713	0.00021464	0.0036336	0.6126
WW domain containing E3 ubiquitin protein ligase 2 [Source:HGNC Symbol;Acc:HGNC:16804]	ENSG00000198373	11060	HGNC Symbol	WWP2	protein_coding	20	4.8035	-1.7591	4.5639	-4.7717	0.00021445	0.0036336	0.61349
target of EGR1, exonuclease [Source:HGNC Symbol;Acc:HGNC:15954]	ENSG00000132773	114034	HGNC Symbol	TOE1	protein_coding	5	5.4647	1.395	5.5146	4.768	0.00021608	0.0036482	0.60596
mediator complex subunit 23 [Source:HGNC Symbol;Acc:HGNC:2372]	ENSG00000112282	9439	HGNC Symbol	MED23	protein_coding	9	5.4663	-2.0944	5.3	-4.767	0.00021651	0.0036502	0.60402
protein arginine methyltransferase 1 [Source:HGNC Symbol;Acc:HGNC:5187]	ENSG00000126457	3276	HGNC Symbol	PRMT1	protein_coding	21	6.9214	1.9911	7.419	4.7662	0.00021686	0.0036509	0.60242
TATA-box binding protein associated factor 12 [Source:HGNC Symbol;Acc:HGNC:11545]	ENSG00000120656	6883	HGNC Symbol	TAF12	protein_coding	4	6.5681	1.0068	6.4516	4.7631	0.00021822	0.0036688	0.59621
SEC24 homolog B, COPII coat complex component [Source:HGNC Symbol;Acc:HGNC:10704]	ENSG00000138802	10427	HGNC Symbol	SEC24B	protein_coding	3	4.4295	-1.5196	4.1462	-4.7615	0.00021896	0.0036759	0.59289
ribosomal protein L26 like 1 [Source:HGNC Symbol;Acc:HGNC:17050]	ENSG00000037241	51121	HGNC Symbol	RPL26L1	protein_coding	6	6.0303	1.4126	5.7532	4.7592	0.00021995	0.0036874	0.58842
PIN2 (TERF1) interacting telomerase inhibitor 1 [Source:HGNC Symbol;Acc:HGNC:30046]	ENSG00000254093	54984	HGNC Symbol	PINX1	protein_coding	8	3.0773	1.5326	3.3233	4.7573	0.0002208	0.0036965	0.58459
phosphoglucomutase 3 [Source:HGNC Symbol;Acc:HGNC:8907]	ENSG00000013375	5238	HGNC Symbol	PGM3	protein_coding	22	4.6269	0.99566	4.5399	4.749	0.00022455	0.0037541	0.56791
RNA polymerase II subunit H [Source:HGNC Symbol;Acc:HGNC:9195]	ENSG00000163882	5437	HGNC Symbol	POLR2H	protein_coding	13	6.6329	1.8619	6.6536	4.7469	0.00022552	0.003765	0.56367
fumarylacetoacetate hydrolase domain containing 1 [Source:HGNC Symbol;Acc:HGNC:14169]	ENSG00000180185	81889	HGNC Symbol	FAHD1	protein_coding	4	4.0683	1.1388	3.7598	4.744	0.00022685	0.0037743	0.55781
metaxin 3 [Source:HGNC Symbol;Acc:HGNC:24812]	ENSG00000177034	345778	HGNC Symbol	MTX3	protein_coding	4	3.0225	-0.97816	2.9218	-4.7438	0.00022695	0.0037743	0.5574
TOP1 binding arginine/serine rich protein [Source:HGNC Symbol;Acc:HGNC:21653]	ENSG00000197579	10210	HGNC Symbol	TOPORS	protein_coding	2	5.3258	-1.6925	5.1177	-4.7436	0.00022702	0.0037743	0.55709
RNF139 antisense RNA 1 (head to head) [Source:HGNC Symbol;Acc:HGNC:48940]	ENSG00000245149	NA	HGNC Symbol	RNF139-AS1	lincRNA	3	3.0876	-2.2	2.7435	-4.7408	0.00022832	0.0037906	0.55145
glycerol kinase [Source:HGNC Symbol;Acc:HGNC:4289]	ENSG00000198814	2710	HGNC Symbol	GK	protein_coding	12	3.4711	1.6058	3.493	4.7392	0.00022909	0.0037982	0.54809
ALG8, alpha-1,3-glucosyltransferase [Source:HGNC Symbol;Acc:HGNC:23161]	ENSG00000159063	79053	HGNC Symbol	ALG8	protein_coding	21	5.9221	1.4614	5.8112	4.738	0.00022965	0.0038003	0.5457
armadillo repeat containing 6 [Source:HGNC Symbol;Acc:HGNC:25049]	ENSG00000105676	93436	HGNC Symbol	ARMC6	protein_coding	20	2.9995	1.3572	2.5768	4.7372	0.00023	0.0038003	0.54418
histone cluster 4 H4 [Source:HGNC Symbol;Acc:HGNC:20510]	ENSG00000197837	121504	HGNC Symbol	HIST4H4	protein_coding	6	2.6389	-2.5017	2.138	-4.7369	0.00023017	0.0038003	0.54345
coiled-coil domain containing 90B [Source:HGNC Symbol;Acc:HGNC:28108]	ENSG00000137500	60492	HGNC Symbol	CCDC90B	protein_coding	19	6.3745	0.78934	6.2175	4.7332	0.0002319	0.0038236	0.53605
T cell immunoglobulin and mucin domain containing 4 [Source:HGNC Symbol;Acc:HGNC:25132]	ENSG00000145850	91937	HGNC Symbol	TIMD4	protein_coding	3	3.5786	1.5669	3.5578	4.726	0.00023533	0.0038695	0.52152
SNAP associated protein [Source:HGNC Symbol;Acc:HGNC:17145]	ENSG00000143553	23557	HGNC Symbol	SNAPIN	protein_coding	4	4.515	0.95041	4.067	4.7263	0.00023518	0.0038695	0.52212
ER degradation enhancing alpha-mannosidase like protein 3 [Source:HGNC Symbol;Acc:HGNC:16787]	ENSG00000116406	80267	HGNC Symbol	EDEM3	protein_coding	6	4.0921	1.0824	3.8839	4.7232	0.00023664	0.0038858	0.51599
purinergic receptor P2X 5 [Source:HGNC Symbol;Acc:HGNC:8536]	ENSG00000083454	5026	HGNC Symbol	P2RX5	protein_coding	11	5.1639	5.2212	5.9471	4.7213	0.00023754	0.0038953	0.51223
O-GlcNAcase [Source:HGNC Symbol;Acc:HGNC:7056]	ENSG00000198408	10724	HGNC Symbol	OGA	protein_coding	11	6.9315	-2.0785	6.9739	-4.7196	0.0002384	0.003904	0.50867
REST corepressor 1 [Source:HGNC Symbol;Acc:HGNC:17441]	ENSG00000089902	23186	HGNC Symbol	RCOR1	protein_coding	4	3.1953	-1.3161	2.9183	-4.7184	0.00023896	0.0039078	0.50635
vitamin K epoxide reductase complex subunit 1 like 1 [Source:HGNC Symbol;Acc:HGNC:21492]	ENSG00000196715	154807	HGNC Symbol	VKORC1L1	protein_coding	4	3.526	1.6015	3.5183	4.7139	0.00024116	0.0039384	0.49728
electron transfer flavoprotein subunit alpha [Source:HGNC Symbol;Acc:HGNC:3481]	ENSG00000140374	2108	HGNC Symbol	ETFA	protein_coding	20	7.1093	1.0937	7.1	4.7132	0.00024152	0.0039388	0.49582
sigma non-opioid intracellular receptor 1 [Source:HGNC Symbol;Acc:HGNC:8157]	ENSG00000147955	10280	HGNC Symbol	SIGMAR1	protein_coding	7	4.1355	1.2224	4.17	4.7091	0.00024353	0.0039662	0.48762
LIM domain containing preferred translocation partner in lipoma [Source:HGNC Symbol;Acc:HGNC:6679]	ENSG00000145012	4026	HGNC Symbol	LPP	protein_coding	22	5.3996	-2.0677	5.2101	-4.7042	0.00024595	0.0039948	0.47783
dual specificity phosphatase 2 [Source:HGNC Symbol;Acc:HGNC:3068]	ENSG00000158050	1844	HGNC Symbol	DUSP2	protein_coding	2	4.4716	-3.1288	4.3156	-4.7045	0.00024583	0.0039948	0.47828
Nedd4 family interacting protein 2 [Source:HGNC Symbol;Acc:HGNC:18537]	ENSG00000102471	54602	HGNC Symbol	NDFIP2	protein_coding	7	5.3089	4.5042	5.6549	4.6991	0.00024855	0.0040316	0.46743
tyrosine 3-monooxygenase/tryptophan 5-monooxygenase activation protein gamma [Source:HGNC Symbol;Acc:HGNC:12852]	ENSG00000170027	7532	HGNC Symbol	YWHAG	protein_coding	1	3.9405	1.0459	3.7846	4.6983	0.00024893	0.0040323	0.4659
UL16 binding protein 2 [Source:HGNC Symbol;Acc:HGNC:14894]	ENSG00000131015	80328	HGNC Symbol	ULBP2	protein_coding	1	3.6007	3.1112	3.8172	4.6962	0.00025001	0.0040444	0.46162
RAB11 family interacting protein 1 [Source:HGNC Symbol;Acc:HGNC:30265]	ENSG00000156675	80223	HGNC Symbol	RAB11FIP1	protein_coding	6	5.7163	-1.6656	5.5653	-4.6945	0.00025087	0.0040473	0.45823
utrophin [Source:HGNC Symbol;Acc:HGNC:12635]	ENSG00000152818	7402	HGNC Symbol	UTRN	protein_coding	13	7.4175	-2.3694	7.318	-4.6951	0.00025058	0.0040473	0.45936
F-box and leucine rich repeat protein 3 [Source:HGNC Symbol;Acc:HGNC:13599]	ENSG00000005812	26224	HGNC Symbol	FBXL3	protein_coding	6	4.6099	-1.4966	4.347	-4.693	0.00025163	0.0040487	0.45523
metastasis associated lung adenocarcinoma transcript 1 [Source:HGNC Symbol;Acc:HGNC:29665]	ENSG00000251562	NA	HGNC Symbol	MALAT1	lincRNA	17	13.48	-1.8813	13.912	-4.6933	0.00025147	0.0040487	0.45586
RPTOR independent companion of MTOR complex 2 [Source:HGNC Symbol;Acc:HGNC:28611]	ENSG00000164327	253260	HGNC Symbol	RICTOR	protein_coding	10	6.2503	-2.1682	5.8997	-4.6889	0.00025377	0.0040777	0.44685
WD repeat domain 12 [Source:HGNC Symbol;Acc:HGNC:14098]	ENSG00000138442	55759	HGNC Symbol	WDR12	protein_coding	8	6.3343	2.7177	6.4107	4.6878	0.0002543	0.0040808	0.44476
HCLS1 associated protein X-1 [Source:HGNC Symbol;Acc:HGNC:16915]	ENSG00000143575	10456	HGNC Symbol	HAX1	protein_coding	11	7.6491	1.3704	7.693	4.6859	0.00025533	0.0040863	0.44077
centromere protein C [Source:HGNC Symbol;Acc:HGNC:1854]	ENSG00000145241	1060	HGNC Symbol	CENPC	protein_coding	7	5.8639	-1.8471	5.5572	-4.6862	0.00025516	0.0040863	0.44142
holocytochrome c synthase [Source:HGNC Symbol;Acc:HGNC:4837]	ENSG00000004961	3052	HGNC Symbol	HCCS	protein_coding	3	3.9287	1.7544	4.054	4.6828	0.00025693	0.0041009	0.43461
selenoprotein F [Source:HGNC Symbol;Acc:HGNC:17705]	ENSG00000183291	9403	HGNC Symbol	SELENOF	protein_coding	9	8.5275	1.069	8.6216	4.6829	0.00025689	0.0041009	0.43477
mediator complex subunit 6 [Source:HGNC Symbol;Acc:HGNC:19970]	ENSG00000133997	10001	HGNC Symbol	MED6	protein_coding	12	5.2659	-0.78465	5.2098	-4.6792	0.00025881	0.0041254	0.42739
cleavage and polyadenylation specific factor 3 [Source:HGNC Symbol;Acc:HGNC:2326]	ENSG00000119203	51692	HGNC Symbol	CPSF3	protein_coding	5	6.7268	1.0894	6.4662	4.6769	0.00026002	0.0041393	0.42276
cytochrome b5 type B [Source:HGNC Symbol;Acc:HGNC:24374]	ENSG00000103018	80777	HGNC Symbol	CYB5B	protein_coding	7	7.9171	1.0409	7.8766	4.6751	0.00026096	0.0041488	0.41918
dipeptidyl peptidase 4 [Source:HGNC Symbol;Acc:HGNC:3009]	ENSG00000197635	1803	HGNC Symbol	DPP4	protein_coding	11	5.263	3.8041	4.8561	4.6739	0.00026164	0.0041541	0.41661
CCAAT enhancer binding protein beta [Source:HGNC Symbol;Acc:HGNC:1834]	ENSG00000172216	1051	HGNC Symbol	CEBPB	protein_coding	1	2.0341	1.7543	2.814	4.6687	0.00026444	0.0041929	0.40609
pleckstrin homology like domain family A member 1 [Source:HGNC Symbol;Acc:HGNC:8933]	ENSG00000139289	22822	HGNC Symbol	PHLDA1	protein_coding	3	4.6674	1.7458	4.9006	4.6678	0.00026492	0.0041935	0.40429
enhancer of mRNA decapping 3 [Source:HGNC Symbol;Acc:HGNC:26114]	ENSG00000179151	80153	HGNC Symbol	EDC3	protein_coding	19	5.3816	1.1265	5.3091	4.6673	0.00026518	0.0041935	0.40334
adenosylhomocysteinase like 1 [Source:HGNC Symbol;Acc:HGNC:344]	ENSG00000168710	10768	HGNC Symbol	AHCYL1	protein_coding	6	5.2823	1.0639	5.2353	4.6658	0.00026598	0.0041952	0.40034
RNA binding motif protein 34 [Source:HGNC Symbol;Acc:HGNC:28965]	ENSG00000188739	23029	HGNC Symbol	RBM34	protein_coding	10	2.77	-1.1367	2.7062	-4.6658	0.00026598	0.0041952	0.40034
acetyl-CoA acetyltransferase 2 [Source:HGNC Symbol;Acc:HGNC:94]	ENSG00000120437	39	HGNC Symbol	ACAT2	protein_coding	3	7.072	1.9396	7.1626	4.6623	0.0002679	0.0042199	0.39324
catenin beta 1 [Source:HGNC Symbol;Acc:HGNC:2514]	ENSG00000168036	1499	HGNC Symbol	CTNNB1	protein_coding	56	5.8686	-1.2821	5.8741	-4.659	0.00026968	0.0042423	0.38669
Kruppel like factor 3 [Source:HGNC Symbol;Acc:HGNC:16516]	ENSG00000109787	51274	HGNC Symbol	KLF3	protein_coding	3	4.7093	-2.4072	4.2873	-4.6582	0.00027016	0.0042443	0.38492
KIAA1328 [Source:HGNC Symbol;Acc:HGNC:29248]	ENSG00000150477	57536	HGNC Symbol	KIAA1328	protein_coding	12	3.6641	-1.175	3.5144	-4.6567	0.00027094	0.004251	0.38207
integrin subunit alpha E [Source:HGNC Symbol;Acc:HGNC:6147]	ENSG00000083457	3682	HGNC Symbol	ITGAE	protein_coding	9	7.3973	0.94727	7.5233	4.655	0.00027193	0.0042609	0.37847
tubulin gamma 1 [Source:HGNC Symbol;Acc:HGNC:12417]	ENSG00000131462	7283	HGNC Symbol	TUBG1	protein_coding	5	4.8144	2.1133	4.9357	4.653	0.00027299	0.0042664	0.37461
NSE3 homolog, SMC5-SMC6 complex component [Source:HGNC Symbol;Acc:HGNC:7677]	ENSG00000185115	56160	HGNC Symbol	NSMCE3	protein_coding	1	2.3503	-1.4852	2.399	-4.6535	0.00027273	0.0042664	0.37557
guanylate binding protein 1 [Source:HGNC Symbol;Acc:HGNC:4182]	ENSG00000117228	2633	HGNC Symbol	GBP1	protein_coding	8	7.7354	2.6255	8.2906	4.6501	0.00027462	0.0042722	0.36873
proline rich 3 [Source:HGNC Symbol;Acc:HGNC:21149]	ENSG00000204576	80742	HGNC Symbol	PRR3	protein_coding	6	4.3141	1.2683	4.4141	4.6498	0.00027478	0.0042722	0.36813
cleavage and polyadenylation specific factor 2 [Source:HGNC Symbol;Acc:HGNC:2325]	ENSG00000165934	53981	HGNC Symbol	CPSF2	protein_coding	5	6.1097	0.96437	5.7652	4.6509	0.00027419	0.0042722	0.37029
UV radiation resistance associated [Source:HGNC Symbol;Acc:HGNC:12640]	ENSG00000198382	7405	HGNC Symbol	UVRAG	protein_coding	9	3.472	-1.8039	3.2923	-4.6511	0.00027409	0.0042722	0.37062
SRP receptor subunit beta [Source:HGNC Symbol;Acc:HGNC:24085]	ENSG00000144867	58477	HGNC Symbol	SRPRB	protein_coding	5	6.6366	2.4584	6.8884	4.6464	0.00027673	0.0042969	0.36114
ring finger protein, LIM domain interacting [Source:HGNC Symbol;Acc:HGNC:13429]	ENSG00000131263	51132	HGNC Symbol	RLIM	protein_coding	2	4.3763	-1.3803	3.9665	-4.6414	0.00027953	0.0043347	0.35119
lamin B2 [Source:HGNC Symbol;Acc:HGNC:6638]	ENSG00000176619	84823	HGNC Symbol	LMNB2	protein_coding	6	1.7513	1.2272	1.4947	4.6386	0.00028113	0.0043427	0.34554
UDP-glucuronate decarboxylase 1 [Source:HGNC Symbol;Acc:HGNC:17729]	ENSG00000115652	80146	HGNC Symbol	UXS1	protein_coding	15	5.6184	1.0131	5.4512	4.6392	0.00028082	0.0043427	0.34665
mitochondrial ribosomal protein L42 [Source:HGNC Symbol;Acc:HGNC:14493]	ENSG00000198015	28977	HGNC Symbol	MRPL42	protein_coding	10	7.452	0.93465	7.402	4.6393	0.00028073	0.0043427	0.34694
trafficking protein particle complex 2B [Source:HGNC Symbol;Acc:HGNC:10710]	ENSG00000256060	10597	HGNC Symbol	TRAPPC2B	protein_coding	2	4.3709	-1.2109	4.0873	-4.6367	0.00028223	0.004354	0.3417
Rho GTPase activating protein 15 [Source:HGNC Symbol;Acc:HGNC:21030]	ENSG00000075884	55843	HGNC Symbol	ARHGAP15	protein_coding	13	8.1457	-0.92916	7.9227	-4.6356	0.00028291	0.0043589	0.33932
family with sequence similarity 129 member A [Source:HGNC Symbol;Acc:HGNC:16784]	ENSG00000135842	116496	HGNC Symbol	FAM129A	protein_coding	5	6.1959	1.3993	6.3833	4.633	0.00028441	0.0043708	0.33407
chromodomain helicase DNA binding protein 2 [Source:HGNC Symbol;Acc:HGNC:1917]	ENSG00000173575	1106	HGNC Symbol	CHD2	protein_coding	29	7.6123	-1.7946	7.6213	-4.6334	0.00028416	0.0043708	0.33494
glutaryl-CoA dehydrogenase [Source:HGNC Symbol;Acc:HGNC:4189]	ENSG00000105607	2639	HGNC Symbol	GCDH	protein_coding	16	4.8746	1.1147	4.7873	4.6311	0.00028547	0.0043815	0.33038
novel transcript	ENSG00000278002	NA	Clone-based (Ensembl) gene	AL627171.1	lincRNA	1	3.0007	-1.8166	3.3092	-4.6305	0.00028587	0.004382	0.32901
extended synaptotagmin 2 [Source:HGNC Symbol;Acc:HGNC:22211]	ENSG00000117868	57488	HGNC Symbol	ESYT2	protein_coding	7	4.653	-2.6763	4.2575	-4.6249	0.00028913	0.0044262	0.31781
phosphoribosylglycinamide formyltransferase, phosphoribosylglycinamide synthetase, phosphoribosylaminoimidazole synthetase [Source:HGNC Symbol;Acc:HGNC:4163]	ENSG00000159131	2618	HGNC Symbol	GART	protein_coding	18	6.8892	1.5443	6.7258	4.6226	0.00029048	0.0044413	0.31319
phosphatidylinositol-4-phosphate 3-kinase catalytic subunit type 2 alpha [Source:HGNC Symbol;Acc:HGNC:8971]	ENSG00000011405	5286	HGNC Symbol	PIK3C2A	protein_coding	5	4.5059	-1.7075	4.3975	-4.6209	0.00029148	0.0044453	0.30978
megakaryocyte and platelet inhibitory receptor G6b [Source:HGNC Symbol;Acc:HGNC:13937]	ENSG00000204420	80739	HGNC Symbol	MPIG6B	protein_coding	12	1.5772	-3.6512	0.55574	-4.621	0.00029147	0.0044453	0.30983
family with sequence similarity 86 member C1 [Source:HGNC Symbol;Acc:HGNC:25561]	ENSG00000158483	55199	HGNC Symbol	FAM86C1	protein_coding	6	3.1122	1.6549	2.8419	4.6168	0.00029395	0.0044603	0.30143
arginyl-tRNA synthetase [Source:HGNC Symbol;Acc:HGNC:9870]	ENSG00000113643	5917	HGNC Symbol	RARS	protein_coding	10	6.7482	1.2487	6.6091	4.617	0.00029383	0.0044603	0.30184
acetyl-CoA acetyltransferase 1 [Source:HGNC Symbol;Acc:HGNC:93]	ENSG00000075239	38	HGNC Symbol	ACAT1	protein_coding	12	5.7022	1.0793	5.4256	4.6174	0.0002936	0.0044603	0.3026
CREB3 regulatory factor [Source:HGNC Symbol;Acc:HGNC:24050]	ENSG00000164463	153222	HGNC Symbol	CREBRF	protein_coding	6	5.4921	-3.6899	4.7609	-4.6172	0.00029371	0.0044603	0.30223
transmembrane protein 120A [Source:HGNC Symbol;Acc:HGNC:21697]	ENSG00000189077	83862	HGNC Symbol	TMEM120A	protein_coding	15	4.818	3.0887	5.7294	4.6142	0.00029554	0.0044618	0.2961
long intergenic non-protein coding RNA 1871 [Source:HGNC Symbol;Acc:HGNC:52690]	ENSG00000235576	NA	HGNC Symbol	LINC01871	lincRNA	1	6.8562	2.4636	6.5566	4.6148	0.00029515	0.0044618	0.29743
mitochondrial ribosomal protein L39 [Source:HGNC Symbol;Acc:HGNC:14027]	ENSG00000154719	54148	HGNC Symbol	MRPL39	protein_coding	3	6.3874	1.2297	6.2636	4.6143	0.00029546	0.0044618	0.29636
leucine rich repeat protein 1 [Source:HGNC Symbol;Acc:HGNC:19742]	ENSG00000165501	122769	HGNC Symbol	LRR1	protein_coding	5	4.8693	1.1239	4.468	4.6152	0.00029491	0.0044618	0.29822
transmembrane protein 206 [Source:HGNC Symbol;Acc:HGNC:25593]	ENSG00000065600	55248	HGNC Symbol	TMEM206	protein_coding	5	4.4532	0.94133	4.3862	4.611	0.00029745	0.0044814	0.28974
small nuclear ribonucleoprotein U5 subunit 40 [Source:HGNC Symbol;Acc:HGNC:30857]	ENSG00000060688	9410	HGNC Symbol	SNRNP40	protein_coding	7	5.9489	0.85672	5.7889	4.6108	0.00029759	0.0044814	0.28927
tetratricopeptide repeat domain 14 [Source:HGNC Symbol;Acc:HGNC:24697]	ENSG00000163728	151613	HGNC Symbol	TTC14	protein_coding	11	4.6766	-1.2504	4.7382	-4.6094	0.00029842	0.0044883	0.28652
VPS37B, ESCRT-I subunit [Source:HGNC Symbol;Acc:HGNC:25754]	ENSG00000139722	79720	HGNC Symbol	VPS37B	protein_coding	4	4.0731	-2.0663	3.644	-4.6079	0.00029938	0.004497	0.28335
baculoviral IAP repeat containing 3 [Source:HGNC Symbol;Acc:HGNC:591]	ENSG00000023445	330	HGNC Symbol	BIRC3	protein_coding	7	7.3395	2.6809	7.4633	4.6055	0.0003008	0.0045076	0.27866
lysine acetyltransferase 7 [Source:HGNC Symbol;Acc:HGNC:17016]	ENSG00000136504	11143	HGNC Symbol	KAT7	protein_coding	18	5.7656	-1.6133	5.6183	-4.6055	0.00030083	0.0045076	0.27856
zinc finger AN1-type containing 4 [Source:HGNC Symbol;Acc:HGNC:23504]	ENSG00000172671	93550	HGNC Symbol	ZFAND4	protein_coding	9	3.9363	-1.1472	3.6252	-4.6039	0.00030184	0.004517	0.27526
valosin containing protein lysine methyltransferase [Source:HGNC Symbol;Acc:HGNC:20352]	ENSG00000100483	79609	HGNC Symbol	VCPKMT	protein_coding	5	3.7929	-0.93229	3.9135	-4.5964	0.00030647	0.0045806	0.26019
nuclear receptor subfamily 1 group D member 2 [Source:HGNC Symbol;Acc:HGNC:7963]	ENSG00000174738	9975	HGNC Symbol	NR1D2	protein_coding	5	3.579	-2.6019	3.1425	-4.5954	0.0003071	0.0045844	0.25815
protein phosphatase 2 catalytic subunit beta [Source:HGNC Symbol;Acc:HGNC:9300]	ENSG00000104695	5516	HGNC Symbol	PPP2CB	protein_coding	10	3.9387	0.83288	3.7665	4.5929	0.00030865	0.0045937	0.25317
YTH domain containing 1 [Source:HGNC Symbol;Acc:HGNC:30626]	ENSG00000083896	91746	HGNC Symbol	YTHDC1	protein_coding	7	5.5573	-1.3717	5.4655	-4.5928	0.00030874	0.0045937	0.25288
tigger transposable element derived 1 [Source:HGNC Symbol;Acc:HGNC:14523]	ENSG00000221944	200765	HGNC Symbol	TIGD1	protein_coding	1	2.9143	-1.3774	2.9976	-4.5926	0.00030888	0.0045937	0.25246
nucleolar protein 7 [Source:HGNC Symbol;Acc:HGNC:21040]	ENSG00000225921	51406	HGNC Symbol	NOL7	protein_coding	3	2.9488	1.2052	3.2586	4.5912	0.00030973	0.0046007	0.24972
RAP1 GTPase activating protein 2 [Source:HGNC Symbol;Acc:HGNC:29176]	ENSG00000132359	23108	HGNC Symbol	RAP1GAP2	protein_coding	9	3.0507	-4.0461	2.5654	-4.5896	0.00031079	0.0046107	0.24636
translocase of inner mitochondrial membrane 10 [Source:HGNC Symbol;Acc:HGNC:11814]	ENSG00000134809	26519	HGNC Symbol	TIMM10	protein_coding	3	5.7103	1.9591	5.7017	4.5889	0.00031124	0.0046117	0.24492
hydroxysteroid 17-beta dehydrogenase 7 [Source:HGNC Symbol;Acc:HGNC:5215]	ENSG00000132196	51478	HGNC Symbol	HSD17B7	protein_coding	11	5.5888	0.92261	5.3997	4.5853	0.0003135	0.004629	0.23776
NFKB repressing factor [Source:HGNC Symbol;Acc:HGNC:19374]	ENSG00000186416	55922	HGNC Symbol	NKRF	protein_coding	5	3.4311	-1.2234	3.3934	-4.5861	0.00031302	0.004629	0.2393
hemoglobin subunit beta [Source:HGNC Symbol;Acc:HGNC:4827]	ENSG00000244734	3043	HGNC Symbol	HBB	protein_coding	6	5.4859	-4.0048	4.1837	-4.5852	0.00031357	0.004629	0.23755
angel homolog 2 [Source:HGNC Symbol;Acc:HGNC:30534]	ENSG00000174606	90806	HGNC Symbol	ANGEL2	protein_coding	8	4.6968	-1.5834	4.3979	-4.5827	0.0003152	0.0046474	0.23242
YAE1, ABCE1 maturation factor [Source:HGNC Symbol;Acc:HGNC:24857]	ENSG00000241127	57002	HGNC Symbol	YAE1	protein_coding	6	3.6913	1.6386	3.1007	4.5808	0.00031644	0.0046552	0.22854
crooked neck pre-mRNA splicing factor 1 [Source:HGNC Symbol;Acc:HGNC:15762]	ENSG00000101343	51340	HGNC Symbol	CRNKL1	protein_coding	7	5.9683	-1.1757	5.6291	-4.5807	0.00031651	0.0046552	0.22832
COP9 signalosome subunit 2 [Source:HGNC Symbol;Acc:HGNC:30747]	ENSG00000166200	9318	HGNC Symbol	COPS2	protein_coding	8	6.609	-0.95197	6.438	-4.5786	0.00031785	0.0046692	0.22413
phosphoenolpyruvate carboxykinase 2, mitochondrial [Source:HGNC Symbol;Acc:HGNC:8725]	ENSG00000100889	5106	HGNC Symbol	PCK2	protein_coding	16	4.6444	1.3395	4.3728	4.5764	0.0003193	0.0046735	0.21963
zinc finger DHHC-type containing 16 [Source:HGNC Symbol;Acc:HGNC:20714]	ENSG00000171307	84287	HGNC Symbol	ZDHHC16	protein_coding	18	3.5765	1.2605	3.398	4.5764	0.00031931	0.0046735	0.2196
zinc finger E-box binding homeobox 2 [Source:HGNC Symbol;Acc:HGNC:14881]	ENSG00000169554	9839	HGNC Symbol	ZEB2	protein_coding	48	6.2651	-2.1504	6.6878	-4.5771	0.00031882	0.0046735	0.22113
regulator of G protein signaling 16 [Source:HGNC Symbol;Acc:HGNC:9997]	ENSG00000143333	6004	HGNC Symbol	RGS16	protein_coding	1	4.0868	5.415	5.0338	4.5729	0.0003216	0.0047013	0.21254
proteasome 26S subunit, non-ATPase 11 [Source:HGNC Symbol;Acc:HGNC:9556]	ENSG00000108671	5717	HGNC Symbol	PSMD11	protein_coding	12	8.3025	1.3873	8.4806	4.5711	0.00032277	0.0047126	0.20896
FKBP prolyl isomerase 4 [Source:HGNC Symbol;Acc:HGNC:3720]	ENSG00000004478	2288	HGNC Symbol	FKBP4	protein_coding	8	4.1422	1.8086	4.5585	4.5669	0.00032553	0.0047471	0.20053
sterile alpha motif domain containing 4B [Source:HGNC Symbol;Acc:HGNC:25492]	ENSG00000179134	55095	HGNC Symbol	SAMD4B	protein_coding	14	4.3778	-1.2996	3.8879	-4.5662	0.00032601	0.0047483	0.19908
BUB1 mitotic checkpoint serine/threonine kinase [Source:HGNC Symbol;Acc:HGNC:1148]	ENSG00000169679	699	HGNC Symbol	BUB1	protein_coding	12	4.7045	2.0589	3.5352	4.5648	0.00032696	0.0047554	0.19619
myotrophin [Source:HGNC Symbol;Acc:HGNC:15667]	ENSG00000105887	136319	HGNC Symbol	MTPN	protein_coding	2	6.83	-0.87664	7.0601	-4.5643	0.00032729	0.0047554	0.19521
nuclear receptor coactivator 5 [Source:HGNC Symbol;Acc:HGNC:15909]	ENSG00000124160	57727	HGNC Symbol	NCOA5	protein_coding	2	4.0414	1.2544	4.0048	4.5617	0.00032906	0.0047604	0.18988
lysophospholipase 2 [Source:HGNC Symbol;Acc:HGNC:6738]	ENSG00000011009	11313	HGNC Symbol	LYPLA2	protein_coding	10	4.9802	1.1699	5.3552	4.5617	0.00032902	0.0047604	0.18999
RALY heterogeneous nuclear ribonucleoprotein [Source:HGNC Symbol;Acc:HGNC:15921]	ENSG00000125970	22913	HGNC Symbol	RALY	protein_coding	10	3.8859	-1.0363	3.8189	-4.5614	0.00032922	0.0047604	0.18939
SBDS, ribosome maturation factor [Source:HGNC Symbol;Acc:HGNC:19440]	ENSG00000126524	51119	HGNC Symbol	SBDS	protein_coding	5	6.1919	-1.1319	6.6797	-4.5621	0.00032876	0.0047604	0.19078
YTH domain containing 2 [Source:HGNC Symbol;Acc:HGNC:24721]	ENSG00000047188	64848	HGNC Symbol	YTHDC2	protein_coding	7	3.8556	-1.2121	3.5831	-4.5596	0.00033044	0.0047723	0.18572
RAB21, member RAS oncogene family [Source:HGNC Symbol;Acc:HGNC:18263]	ENSG00000080371	23011	HGNC Symbol	RAB21	protein_coding	4	6.7574	0.93665	6.7767	4.5581	0.0003315	0.0047818	0.18258
DEAD-box helicase 1 [Source:HGNC Symbol;Acc:HGNC:2734]	ENSG00000079785	1653	HGNC Symbol	DDX1	protein_coding	8	7.3201	1.2908	7.3158	4.5529	0.00033505	0.0048272	0.17204
tetratricopeptide repeat domain 39B [Source:HGNC Symbol;Acc:HGNC:23704]	ENSG00000155158	158219	HGNC Symbol	TTC39B	protein_coding	9	5.4788	-2.4706	5.0564	-4.552	0.00033565	0.00483	0.17028
thioredoxin domain containing 15 [Source:HGNC Symbol;Acc:HGNC:20652]	ENSG00000113621	79770	HGNC Symbol	TXNDC15	protein_coding	10	4.4989	1.2241	4.5968	4.5504	0.00033673	0.0048398	0.16709
nucleoporin 43 [Source:HGNC Symbol;Acc:HGNC:21182]	ENSG00000120253	348995	HGNC Symbol	NUP43	protein_coding	6	5.1208	0.99976	5.0087	4.549	0.00033775	0.0048486	0.16411
phosphatidylserine decarboxylase [Source:HGNC Symbol;Acc:HGNC:8999]	ENSG00000241878	23761	HGNC Symbol	PISD	protein_coding	17	5.999	0.80586	5.9876	4.548	0.00033842	0.0048525	0.16213
adenylate kinase 5 [Source:HGNC Symbol;Acc:HGNC:365]	ENSG00000154027	26289	HGNC Symbol	AK5	protein_coding	13	2.8522	-3.5342	2.3408	-4.546	0.00033979	0.0048663	0.15815
pescadillo ribosomal biogenesis factor 1 [Source:HGNC Symbol;Acc:HGNC:8848]	ENSG00000100029	23481	HGNC Symbol	PES1	protein_coding	13	4.0533	1.6474	4.1308	4.5443	0.00034102	0.004878	0.15458
hexokinase 1 [Source:HGNC Symbol;Acc:HGNC:4922]	ENSG00000156515	3098	HGNC Symbol	HK1	protein_coding	18	5.0144	1.0448	5.0422	4.5415	0.00034297	0.0049001	0.14894
proline rich nuclear receptor coactivator 2 [Source:HGNC Symbol;Acc:HGNC:23158]	ENSG00000189266	55629	HGNC Symbol	PNRC2	protein_coding	5	6.9746	-1.204	6.7407	-4.5391	0.00034463	0.004918	0.14416
tubulin alpha 1c [Source:HGNC Symbol;Acc:HGNC:20768]	ENSG00000167553	84790	HGNC Symbol	TUBA1C	protein_coding	10	7.3543	2.7555	7.3239	4.5366	0.0003464	0.0049284	0.1391
UDP-glucose 6-dehydrogenase [Source:HGNC Symbol;Acc:HGNC:12525]	ENSG00000109814	7358	HGNC Symbol	UGDH	protein_coding	12	4.3462	1.1523	4.135	4.5363	0.0003466	0.0049284	0.13854
integrator complex subunit 11 [Source:HGNC Symbol;Acc:HGNC:26052]	ENSG00000127054	54973	HGNC Symbol	INTS11	protein_coding	50	4.9593	1.0424	5.1267	4.537	0.00034612	0.0049284	0.13989
E2F transcription factor 6 [Source:HGNC Symbol;Acc:HGNC:3120]	ENSG00000169016	1876	HGNC Symbol	E2F6	protein_coding	12	3.1445	1.6395	2.8498	4.535	0.00034752	0.0049319	0.13591
megakaryocyte-associated tyrosine kinase [Source:HGNC Symbol;Acc:HGNC:6906]	ENSG00000007264	4145	HGNC Symbol	MATK	protein_coding	15	3.2217	-2.0173	2.8788	-4.5348	0.00034767	0.0049319	0.1355
guanylate binding protein 2 [Source:HGNC Symbol;Acc:HGNC:4183]	ENSG00000162645	2634	HGNC Symbol	GBP2	protein_coding	4	9.2456	1.6877	9.6268	4.5329	0.00034907	0.0049395	0.13151
purinergic receptor P2Y14 [Source:HGNC Symbol;Acc:HGNC:16442]	ENSG00000174944	9934	HGNC Symbol	P2RY14	protein_coding	3	1.7949	1.5266	1.2958	4.5318	0.00034985	0.0049395	0.12932
histidyl-tRNA synthetase [Source:HGNC Symbol;Acc:HGNC:4816]	ENSG00000170445	3035	HGNC Symbol	HARS	protein_coding	17	6.0364	1.0654	6.3286	4.5324	0.00034945	0.0049395	0.13044
Cbl proto-oncogene like 1 [Source:HGNC Symbol;Acc:HGNC:21225]	ENSG00000105879	79872	HGNC Symbol	CBLL1	protein_coding	8	6.3863	-1.1987	6.4712	-4.5318	0.00034983	0.0049395	0.12937
polyribonucleotide nucleotidyltransferase 1 [Source:HGNC Symbol;Acc:HGNC:23166]	ENSG00000138035	87178	HGNC Symbol	PNPT1	protein_coding	7	6.0934	1.5494	6.2641	4.5294	0.00035159	0.0049582	0.12442
interferon regulatory factor 2 [Source:HGNC Symbol;Acc:HGNC:6117]	ENSG00000168310	3660	HGNC Symbol	IRF2	protein_coding	9	7.2933	1.6414	7.0881	4.5252	0.00035463	0.0049847	0.11589
zinc finger protein 37A [Source:HGNC Symbol;Acc:HGNC:13102]	ENSG00000075407	7587	HGNC Symbol	ZNF37A	protein_coding	6	5.3532	1.0536	5.3975	4.5251	0.00035472	0.0049847	0.11566
PR/SET domain 2 [Source:HGNC Symbol;Acc:HGNC:9347]	ENSG00000116731	7799	HGNC Symbol	PRDM2	protein_coding	14	5.8406	-1.4798	5.8351	-4.5258	0.00035417	0.0049847	0.11718
family with sequence similarity 200 member A [Source:HGNC Symbol;Acc:HGNC:25401]	ENSG00000221909	221786	HGNC Symbol	FAM200A	protein_coding	2	2.5176	1.2789	1.8323	4.5244	0.00035518	0.0049854	0.11437
cysteinyl-tRNA synthetase [Source:HGNC Symbol;Acc:HGNC:1493]	ENSG00000110619	833	HGNC Symbol	CARS	protein_coding	16	6.9978	1.6032	7.0968	4.5237	0.00035572	0.0049871	0.11288
structural maintenance of chromosomes flexible hinge domain containing 1 [Source:HGNC Symbol;Acc:HGNC:29090]	ENSG00000101596	23347	HGNC Symbol	SMCHD1	protein_coding	15	5.1431	-1.5698	5.1246	-4.522	0.00035697	0.0049988	0.10941
transmembrane protein 267 [Source:HGNC Symbol;Acc:HGNC:26139]	ENSG00000151881	64417	HGNC Symbol	TMEM267	protein_coding	6	5.3918	1.4442	5.5782	4.5213	0.00035744	0.0049996	0.10809
MRT4 homolog, ribosome maturation factor [Source:HGNC Symbol;Acc:HGNC:18477]	ENSG00000053372	51154	HGNC Symbol	MRTO4	protein_coding	3	6.3496	2.9504	6.7061	4.5162	0.00036125	0.0050352	0.097618
transmembrane protein 33 [Source:HGNC Symbol;Acc:HGNC:25541]	ENSG00000109133	55161	HGNC Symbol	TMEM33	protein_coding	8	6.6224	1.4742	6.7424	4.5171	0.00036059	0.0050352	0.099413
activator of HSP90 ATPase homolog 2, pseudogene [Source:HGNC Symbol;Acc:HGNC:20437]	ENSG00000173209	NA	HGNC Symbol	AHSA2P	transcribed_unitary_pseudogene	15	3.383	-2.5043	3.2709	-4.5163	0.00036117	0.0050352	0.097844
2-oxoglutarate and iron dependent oxygenase domain containing 1 [Source:HGNC Symbol;Acc:HGNC:25585]	ENSG00000087263	55239	HGNC Symbol	OGFOD1	protein_coding	11	6.3363	1.1855	6.2994	4.5131	0.00036355	0.0050614	0.091348
spindle and kinetochore associated complex subunit 2 [Source:HGNC Symbol;Acc:HGNC:28006]	ENSG00000182628	348235	HGNC Symbol	SKA2	protein_coding	10	5.7304	1.028	5.2731	4.5117	0.00036458	0.0050698	0.088561
coiled-coil domain containing 86 [Source:HGNC Symbol;Acc:HGNC:28359]	ENSG00000110104	79080	HGNC Symbol	CCDC86	protein_coding	4	2.948	1.8103	2.6893	4.5093	0.00036635	0.0050827	0.083765
RAB30 antisense RNA 1 (head to head) [Source:HGNC Symbol;Acc:HGNC:48672]	ENSG00000246067	NA	HGNC Symbol	RAB30-AS1	lincRNA	8	3.3526	1.072	3.1	4.5093	0.00036635	0.0050827	0.083774
zinc finger and SCAN domain containing 5A [Source:HGNC Symbol;Acc:HGNC:23710]	ENSG00000131848	79149	HGNC Symbol	ZSCAN5A	protein_coding	17	3.9098	1.184	3.4077	4.5086	0.00036689	0.0050843	0.08231
chromodomain helicase DNA binding protein 6 [Source:HGNC Symbol;Acc:HGNC:19057]	ENSG00000124177	84181	HGNC Symbol	CHD6	protein_coding	9	4.9294	-1.9244	4.6178	-4.5071	0.00036803	0.0050942	0.079252
tubulin gamma complex associated protein 3 [Source:HGNC Symbol;Acc:HGNC:18598]	ENSG00000126216	10426	HGNC Symbol	TUBGCP3	protein_coding	8	3.4591	-0.83717	3.2662	-4.5065	0.00036851	0.0050949	0.07796
polyhomeotic homolog 3 [Source:HGNC Symbol;Acc:HGNC:15682]	ENSG00000173889	80012	HGNC Symbol	PHC3	protein_coding	17	6.4846	-1.965	6.4508	-4.5056	0.00036916	0.005098	0.076225
alpha-1,3-mannosyl-glycoprotein 4-beta-N-acetylglucosaminyltransferase A [Source:HGNC Symbol;Acc:HGNC:7047]	ENSG00000071073	11320	HGNC Symbol	MGAT4A	protein_coding	9	6.6991	-2.7442	6.0661	-4.5035	0.00037079	0.0051147	0.071849
stress induced phosphoprotein 1 [Source:HGNC Symbol;Acc:HGNC:11387]	ENSG00000168439	10963	HGNC Symbol	STIP1	protein_coding	12	7.4394	2.4368	7.8458	4.5005	0.0003731	0.0051261	0.065736
secretion associated Ras related GTPase 1B [Source:HGNC Symbol;Acc:HGNC:10535]	ENSG00000152700	51128	HGNC Symbol	SAR1B	protein_coding	11	7.5649	1.2652	7.6366	4.501	0.00037267	0.0051261	0.06687
transmembrane protein 147 [Source:HGNC Symbol;Acc:HGNC:30414]	ENSG00000105677	10430	HGNC Symbol	TMEM147	protein_coding	9	4.4373	0.84427	4.7493	4.5002	0.00037326	0.0051261	0.065305
zinc finger protein 571 [Source:HGNC Symbol;Acc:HGNC:25000]	ENSG00000180479	51276	HGNC Symbol	ZNF571	protein_coding	6	3.6447	-1.5434	3.3512	-4.5002	0.00037333	0.0051261	0.065124
solute carrier family 26 member 2 [Source:HGNC Symbol;Acc:HGNC:10994]	ENSG00000155850	1836	HGNC Symbol	SLC26A2	protein_coding	3	3.5138	1.0397	3.2824	4.4979	0.00037503	0.0051436	0.060617
zinc finger and BTB domain containing 11 [Source:HGNC Symbol;Acc:HGNC:16740]	ENSG00000066422	27107	HGNC Symbol	ZBTB11	protein_coding	3	4.7285	-1.575	4.4658	-4.4948	0.00037746	0.0051672	0.054253
FosB proto-oncogene, AP-1 transcription factor subunit [Source:HGNC Symbol;Acc:HGNC:3797]	ENSG00000125740	2354	HGNC Symbol	FOSB	protein_coding	13	3.8182	-1.844	5.2463	-4.4946	0.00037761	0.0051672	0.053842
cyclin dependent kinase inhibitor 1B [Source:HGNC Symbol;Acc:HGNC:1785]	ENSG00000111276	1027	HGNC Symbol	CDKN1B	protein_coding	4	2.995	-2.8665	2.3733	-4.4913	0.0003802	0.0051966	0.047099
peroxisomal biogenesis factor 14 [Source:HGNC Symbol;Acc:HGNC:8856]	ENSG00000142655	5195	HGNC Symbol	PEX14	protein_coding	4	2.2726	-1.1185	2.2902	-4.4905	0.0003808	0.0051989	0.045538
maturin, neural progenitor differentiation regulator homolog [Source:HGNC Symbol;Acc:HGNC:25457]	ENSG00000180354	222166	HGNC Symbol	MTURN	protein_coding	4	2.6926	-1.6655	2.3429	-4.4872	0.00038339	0.0052225	0.038844
FCH domain only 2 [Source:HGNC Symbol;Acc:HGNC:25180]	ENSG00000157107	115548	HGNC Symbol	FCHO2	protein_coding	7	2.2867	-2.5277	2.0772	-4.4872	0.0003834	0.0052225	0.038827
coenzyme Q7, hydroxylase [Source:HGNC Symbol;Acc:HGNC:2244]	ENSG00000167186	10229	HGNC Symbol	COQ7	protein_coding	11	4.0744	-1.8876	3.7879	-4.4861	0.00038428	0.0052286	0.03655
heterogeneous nuclear ribonucleoprotein A/B [Source:HGNC Symbol;Acc:HGNC:5034]	ENSG00000197451	3182	HGNC Symbol	HNRNPAB	protein_coding	8	4.1417	1.9357	4.4309	4.4841	0.00038582	0.0052385	0.032588
CDGSH iron sulfur domain 3 [Source:HGNC Symbol;Acc:HGNC:27578]	ENSG00000277972	284106	HGNC Symbol	CISD3	protein_coding	3	3.5463	1.1456	3.7326	4.4838	0.00038612	0.0052385	0.031834
centrosomal protein 85 like [Source:HGNC Symbol;Acc:HGNC:21638]	ENSG00000111860	387119	HGNC Symbol	CEP85L	protein_coding	11	4.6885	-2.1139	4.4224	-4.4835	0.00038632	0.0052385	0.031311
tubulin beta 4B class IVb [Source:HGNC Symbol;Acc:HGNC:20771]	ENSG00000188229	10383	HGNC Symbol	TUBB4B	protein_coding	2	5.9366	1.8944	6.2103	4.4817	0.0003878	0.0052466	0.027553
signal recognition particle 54 [Source:HGNC Symbol;Acc:HGNC:11301]	ENSG00000100883	6729	HGNC Symbol	SRP54	protein_coding	14	7.3867	1.445	7.374	4.4817	0.00038778	0.0052466	0.027582
PSMC3 interacting protein [Source:HGNC Symbol;Acc:HGNC:17928]	ENSG00000131470	29893	HGNC Symbol	PSMC3IP	protein_coding	9	2.0901	1.8705	1.83	4.4798	0.00038928	0.0052584	0.023786
methyl-CpG binding domain protein 5 [Source:HGNC Symbol;Acc:HGNC:20444]	ENSG00000204406	55777	HGNC Symbol	MBD5	protein_coding	34	3.7307	-1.7406	3.4003	-4.4794	0.00038959	0.0052584	0.022986
RNA binding motif protein 38 [Source:HGNC Symbol;Acc:HGNC:15818]	ENSG00000132819	55544	HGNC Symbol	RBM38	protein_coding	5	2.0909	-2.9479	1.7654	-4.4789	0.00038998	0.0052584	0.021993
SEH1 like nucleoporin [Source:HGNC Symbol;Acc:HGNC:30379]	ENSG00000085415	81929	HGNC Symbol	SEH1L	protein_coding	10	5.3048	2.0297	5.3809	4.4762	0.00039215	0.0052817	0.016528
GSK3B interacting protein [Source:HGNC Symbol;Acc:HGNC:20343]	ENSG00000100744	51527	HGNC Symbol	GSKIP	protein_coding	7	6.0466	1.3082	5.5003	4.4724	0.00039525	0.0053071	0.008734
zinc finger protein 518B [Source:HGNC Symbol;Acc:HGNC:29365]	ENSG00000178163	85460	HGNC Symbol	ZNF518B	protein_coding	5	3.9903	1.2722	3.9254	4.4731	0.00039468	0.0053071	0.01018
cleavage and polyadenylation factor I subunit 1 [Source:HGNC Symbol;Acc:HGNC:16999]	ENSG00000172409	10978	HGNC Symbol	CLP1	protein_coding	6	5.5235	-1.1904	5.1219	-4.4723	0.00039537	0.0053071	0.008446
RNA binding motif protein 4 [Source:HGNC Symbol;Acc:HGNC:9901]	ENSG00000173933	5936	HGNC Symbol	RBM4	protein_coding	13	4.1242	-1.0629	4.1288	-4.468	0.00039882	0.0053475	-0.00013682
methionine adenosyltransferase 2A [Source:HGNC Symbol;Acc:HGNC:6904]	ENSG00000168906	4144	HGNC Symbol	MAT2A	protein_coding	6	6.3649	1.6247	6.2983	4.4615	0.0004042	0.0054136	-0.013389
dolichyl-phosphate mannosyltransferase subunit 2, regulatory [Source:HGNC Symbol;Acc:HGNC:3006]	ENSG00000136908	8818	HGNC Symbol	DPM2	protein_coding	5	5.4525	1.3512	5.7915	4.4604	0.00040515	0.0054141	-0.015686
G-patch domain containing 11 [Source:HGNC Symbol;Acc:HGNC:26768]	ENSG00000152133	253635	HGNC Symbol	GPATCH11	protein_coding	3	4.8246	1.1139	4.5219	4.4604	0.00040512	0.0054141	-0.015615
thioredoxin related transmembrane protein 2 [Source:HGNC Symbol;Acc:HGNC:30739]	ENSG00000213593	51075	HGNC Symbol	TMX2	protein_coding	9	6.7554	1.3655	6.9687	4.4587	0.00040654	0.0054206	-0.019069
phosphatidylinositol glycan anchor biosynthesis class F [Source:HGNC Symbol;Acc:HGNC:8962]	ENSG00000151665	5281	HGNC Symbol	PIGF	protein_coding	7	3.9343	0.94138	3.9401	4.4593	0.00040609	0.0054206	-0.017975
serine and arginine repetitive matrix 1 [Source:HGNC Symbol;Acc:HGNC:16638]	ENSG00000133226	10250	HGNC Symbol	SRRM1	protein_coding	23	7.7918	-0.91763	8.0877	-4.458	0.00040711	0.0054223	-0.020474
5'-nucleotidase domain containing 3 [Source:HGNC Symbol;Acc:HGNC:30826]	ENSG00000111696	51559	HGNC Symbol	NT5DC3	protein_coding	5	5.0566	1.4506	4.8829	4.4552	0.0004095	0.005436	-0.026254
centromere protein L [Source:HGNC Symbol;Acc:HGNC:17879]	ENSG00000120334	91687	HGNC Symbol	CENPL	protein_coding	9	5.0431	0.89172	4.5413	4.4554	0.00040928	0.005436	-0.025713
gem nuclear organelle associated protein 5 [Source:HGNC Symbol;Acc:HGNC:20043]	ENSG00000082516	25929	HGNC Symbol	GEMIN5	protein_coding	3	4.3511	0.88805	4.0884	4.456	0.00040884	0.005436	-0.024641
eukaryotic translation initiation factor 4A1 [Source:HGNC Symbol;Acc:HGNC:3282]	ENSG00000161960	1973	HGNC Symbol	EIF4A1	protein_coding	37	4.332	-1.3759	4.5059	-4.4535	0.00041091	0.0054487	-0.029649
kelch like family member 24 [Source:HGNC Symbol;Acc:HGNC:25947]	ENSG00000114796	54800	HGNC Symbol	KLHL24	protein_coding	15	5.2881	-3.7473	4.4519	-4.4501	0.00041379	0.0054807	-0.036529
syntaxin 3 [Source:HGNC Symbol;Acc:HGNC:11438]	ENSG00000166900	6809	HGNC Symbol	STX3	protein_coding	8	3.5561	1.9366	3.1039	4.4459	0.00041742	0.0055106	-0.045165
HSPA (Hsp70) binding protein 1 [Source:HGNC Symbol;Acc:HGNC:24989]	ENSG00000133265	23640	HGNC Symbol	HSPBP1	protein_coding	9	2.3166	1.0219	2.3755	4.4462	0.00041719	0.0055106	-0.044618
BTG3 associated nuclear protein [Source:HGNC Symbol;Acc:HGNC:13450]	ENSG00000172530	54971	HGNC Symbol	BANP	protein_coding	27	3.786	-1.8929	3.4811	-4.4459	0.00041741	0.0055106	-0.045133
nitrilase 1 [Source:HGNC Symbol;Acc:HGNC:7828]	ENSG00000158793	4817	HGNC Symbol	NIT1	protein_coding	16	5.1214	0.98412	4.9458	4.4448	0.00041835	0.0055168	-0.047358
deltex E3 ubiquitin ligase 3L [Source:HGNC Symbol;Acc:HGNC:30323]	ENSG00000163840	151636	HGNC Symbol	DTX3L	protein_coding	2	5.8964	1.5821	5.886	4.4422	0.0004206	0.0055342	-0.052651
hydroxysteroid 17-beta dehydrogenase 12 [Source:HGNC Symbol;Acc:HGNC:18646]	ENSG00000149084	51144	HGNC Symbol	HSD17B12	protein_coding	14	5.1101	1.1006	4.8496	4.4427	0.00042016	0.0055342	-0.05163
transmembrane protein 97 [Source:HGNC Symbol;Acc:HGNC:28106]	ENSG00000109084	27346	HGNC Symbol	TMEM97	protein_coding	5	5.4547	2.6509	5.5581	4.4384	0.0004239	0.0055361	-0.06037
CD200 receptor 1 [Source:HGNC Symbol;Acc:HGNC:24235]	ENSG00000163606	131450	HGNC Symbol	CD200R1	protein_coding	5	1.7927	1.955	1.2287	4.4382	0.00042404	0.0055361	-0.060696
mannosyl (alpha-1,6-)-glycoprotein beta-1,2-N-acetylglucosaminyltransferase [Source:HGNC Symbol;Acc:HGNC:7045]	ENSG00000168282	4247	HGNC Symbol	MGAT2	protein_coding	1	3.8699	1.6021	3.9302	4.4373	0.00042483	0.0055361	-0.062537
chromosome 12 open reading frame 45 [Source:HGNC Symbol;Acc:HGNC:28628]	ENSG00000151131	121053	HGNC Symbol	C12orf45	protein_coding	6	3.9624	1.4397	4.194	4.4394	0.00042304	0.0055361	-0.058372
cyclin dependent kinase 2 associated protein 2 [Source:HGNC Symbol;Acc:HGNC:30833]	ENSG00000167797	10263	HGNC Symbol	CDK2AP2	protein_coding	5	5.3592	1.3052	5.752	4.4368	0.00042529	0.0055361	-0.063616
histone PARylation factor 1 [Source:HGNC Symbol;Acc:HGNC:26051]	ENSG00000056050	54969	HGNC Symbol	HPF1	protein_coding	3	4.3797	1.1087	4.2961	4.4379	0.00042432	0.0055361	-0.061349
spermatogenesis associated 2 [Source:HGNC Symbol;Acc:HGNC:14681]	ENSG00000158480	9825	HGNC Symbol	SPATA2	protein_coding	2	1.9767	-1.2995	1.6234	-4.4372	0.00042498	0.0055361	-0.062888
lysine demethylase 3B [Source:HGNC Symbol;Acc:HGNC:1337]	ENSG00000120733	51780	HGNC Symbol	KDM3B	protein_coding	9	5.0852	-1.6373	4.9327	-4.4367	0.00042536	0.0055361	-0.063775
SET and MYND domain containing 3 [Source:HGNC Symbol;Acc:HGNC:15513]	ENSG00000185420	64754	HGNC Symbol	SMYD3	protein_coding	18	4.4175	-1.8803	3.9298	-4.4391	0.00042329	0.0055361	-0.058955
integrin subunit alpha M [Source:HGNC Symbol;Acc:HGNC:6149]	ENSG00000169896	3684	HGNC Symbol	ITGAM	protein_coding	9	5.4129	-2.5679	5.2466	-4.4384	0.00042393	0.0055361	-0.060457
Jupiter microtubule associated homolog 1 [Source:HGNC Symbol;Acc:HGNC:14569]	ENSG00000189159	51155	HGNC Symbol	JPT1	protein_coding	12	5.2794	0.79961	5.101	4.4307	0.00043065	0.0055869	-0.075992
NEDD4 binding protein 2 like 1 [Source:HGNC Symbol;Acc:HGNC:25037]	ENSG00000139597	90634	HGNC Symbol	N4BP2L1	protein_coding	12	4.1547	-1.6157	3.9713	-4.4311	0.00043031	0.0055869	-0.075194
tetratricopeptide repeat domain 38 [Source:HGNC Symbol;Acc:HGNC:26082]	ENSG00000075234	55020	HGNC Symbol	TTC38	protein_coding	7	6.3156	-2.1347	6.222	-4.4314	0.00043005	0.0055869	-0.074594
sodium channel and clathrin linker 1 [Source:HGNC Symbol;Acc:HGNC:26406]	ENSG00000151466	132320	HGNC Symbol	SCLT1	protein_coding	10	4.8094	-1.4402	4.6122	-4.424	0.00043671	0.0056532	-0.089788
ovo like transcriptional repressor 1 [Source:HGNC Symbol;Acc:HGNC:8525]	ENSG00000172818	5017	HGNC Symbol	OVOL1	protein_coding	3	7.1649	-1.8664	7.5856	-4.4244	0.00043633	0.0056532	-0.088922
presenilin enhancer, gamma-secretase subunit [Source:HGNC Symbol;Acc:HGNC:30100]	ENSG00000205155	55851	HGNC Symbol	PSENEN	protein_coding	3	4.8792	0.73142	4.9157	4.4218	0.00043867	0.0056725	-0.094209
succinate-CoA ligase alpha subunit [Source:HGNC Symbol;Acc:HGNC:11449]	ENSG00000163541	8802	HGNC Symbol	SUCLG1	protein_coding	10	7.8014	0.88212	7.6404	4.4198	0.0004405	0.00569	-0.098319
strawberry notch homolog 2 [Source:HGNC Symbol;Acc:HGNC:29158]	ENSG00000064932	22904	HGNC Symbol	SBNO2	protein_coding	10	1.8534	1.204	1.6725	4.4178	0.00044227	0.0057066	-0.10227
G protein-coupled receptor 137 [Source:HGNC Symbol;Acc:HGNC:24300]	ENSG00000173264	56834	HGNC Symbol	GPR137	protein_coding	19	1.8386	0.99429	1.9046	4.4168	0.00044316	0.0057121	-0.10427
erythroid differentiation regulatory factor 1 [Source:HGNC Symbol;Acc:HGNC:24640]	ENSG00000107938	26098	HGNC Symbol	EDRF1	protein_coding	13	3.9202	-1.4861	3.5092	-4.413	0.00044665	0.0057507	-0.11199
chromosome 1 open reading frame 56 [Source:HGNC Symbol;Acc:HGNC:26045]	ENSG00000143443	54964	HGNC Symbol	C1orf56	protein_coding	3	3.8265	-2.0397	3.3028	-4.4122	0.0004474	0.0057543	-0.11367
beta-1,3-N-acetylgalactosaminyltransferase 1 (globoside blood group) [Source:HGNC Symbol;Acc:HGNC:918]	ENSG00000169255	8706	HGNC Symbol	B3GALNT1	protein_coding	51	3.2294	2.6311	2.8684	4.411	0.00044852	0.0057625	-0.11613
general transcription factor IIi (GTF2I) pseudogene	ENSG00000260404	NA	Clone-based (Ensembl) gene	AC110079.1	transcribed_unprocessed_pseudogene	2	1.9685	-1.7156	1.4615	-4.4092	0.00045018	0.0057776	-0.11977
ubiquitin specific peptidase 48 [Source:HGNC Symbol;Acc:HGNC:18533]	ENSG00000090686	84196	HGNC Symbol	USP48	protein_coding	15	4.8665	-1.0529	4.6556	-4.4054	0.0004537	0.0058166	-0.12746
pyruvate kinase M1/2 [Source:HGNC Symbol;Acc:HGNC:9021]	ENSG00000067225	5315	HGNC Symbol	PKM	protein_coding	25	10.229	3.3087	10.72	4.404	0.00045504	0.0058275	-0.13038
surfeit 2 [Source:HGNC Symbol;Acc:HGNC:11475]	ENSG00000148291	6835	HGNC Symbol	SURF2	protein_coding	3	2.5996	0.87363	2.5129	4.4013	0.00045759	0.0058539	-0.13589
basic leucine zipper ATF-like transcription factor [Source:HGNC Symbol;Acc:HGNC:958]	ENSG00000156127	10538	HGNC Symbol	BATF	protein_coding	3	4.3138	2.6901	4.405	4.3979	0.0004608	0.0058762	-0.1428
ADP ribosylation factor 4 [Source:HGNC Symbol;Acc:HGNC:655]	ENSG00000168374	378	HGNC Symbol	ARF4	protein_coding	9	8.0914	1.5841	8.441	4.3982	0.00046051	0.0058762	-0.14218
terminal uridylyl transferase 4 [Source:HGNC Symbol;Acc:HGNC:28981]	ENSG00000134744	23318	HGNC Symbol	TUT4	protein_coding	21	5.246	-1.8489	4.9844	-4.3986	0.00046018	0.0058762	-0.14146
mitochondrial ribosomal protein L9 [Source:HGNC Symbol;Acc:HGNC:14277]	ENSG00000143436	65005	HGNC Symbol	MRPL9	protein_coding	11	4.3992	-0.93444	4.3774	-4.3966	0.00046209	0.0058864	-0.14556
zinc metallopeptidase STE24 [Source:HGNC Symbol;Acc:HGNC:12877]	ENSG00000084073	10269	HGNC Symbol	ZMPSTE24	protein_coding	4	6.4775	1.845	6.4481	4.3926	0.00046589	0.0059222	-0.15364
exosome component 5 [Source:HGNC Symbol;Acc:HGNC:24662]	ENSG00000077348	56915	HGNC Symbol	EXOSC5	protein_coding	5	5.2848	1.6662	5.4193	4.3928	0.00046571	0.0059222	-0.15326
N-acetyltransferase 9 (putative) [Source:HGNC Symbol;Acc:HGNC:23133]	ENSG00000109065	26151	HGNC Symbol	NAT9	protein_coding	29	3.8946	0.77581	3.7714	4.3904	0.00046803	0.0059431	-0.15816
RNA binding motif protein 28 [Source:HGNC Symbol;Acc:HGNC:21863]	ENSG00000106344	55131	HGNC Symbol	RBM28	protein_coding	8	6.4889	0.84422	6.31	4.3895	0.00046888	0.0059476	-0.15996
arrestin domain containing 3 [Source:HGNC Symbol;Acc:HGNC:29263]	ENSG00000113369	57561	HGNC Symbol	ARRDC3	protein_coding	7	7.0632	-2.5265	7.3615	-4.3876	0.00047071	0.0059645	-0.16381
interferon induced protein 35 [Source:HGNC Symbol;Acc:HGNC:5399]	ENSG00000068079	3430	HGNC Symbol	IFI35	protein_coding	8	6.2401	0.99022	6.3764	4.3816	0.00047659	0.0060326	-0.17606
7-dehydrocholesterol reductase [Source:HGNC Symbol;Acc:HGNC:2860]	ENSG00000172893	1717	HGNC Symbol	DHCR7	protein_coding	12	3.3663	2.1334	3.527	4.3799	0.00047828	0.0060454	-0.17955
solute carrier family 16 member 6 [Source:HGNC Symbol;Acc:HGNC:10927]	ENSG00000108932	9120	HGNC Symbol	SLC16A6	protein_coding	5	2.5361	-1.9813	2.458	-4.3795	0.00047861	0.0060454	-0.18022
ankyrin repeat domain 49 [Source:HGNC Symbol;Acc:HGNC:25970]	ENSG00000168876	54851	HGNC Symbol	ANKRD49	protein_coding	11	6.0534	-1.3295	5.6242	-4.377	0.00048114	0.0060709	-0.18543
myelin protein zero like 2 [Source:HGNC Symbol;Acc:HGNC:3496]	ENSG00000149573	10205	HGNC Symbol	MPZL2	protein_coding	7	2.7277	2.914	1.5159	4.3749	0.00048323	0.0060845	-0.18971
ubiquitin conjugating enzyme E2 Q2 [Source:HGNC Symbol;Acc:HGNC:19248]	ENSG00000140367	92912	HGNC Symbol	UBE2Q2	protein_coding	8	4.9087	-1.445	4.6387	-4.375	0.00048311	0.0060845	-0.18947
RAN binding protein 2 [Source:HGNC Symbol;Acc:HGNC:9848]	ENSG00000153201	5903	HGNC Symbol	RANBP2	protein_coding	5	5.8283	-0.94377	5.7473	-4.3719	0.00048623	0.0061159	-0.19583
major facilitator superfamily domain containing 2A [Source:HGNC Symbol;Acc:HGNC:25897]	ENSG00000168389	84879	HGNC Symbol	MFSD2A	protein_coding	10	1.6265	4.2682	2.1282	4.3678	0.00049031	0.0061257	-0.20408
intercellular adhesion molecule 1 [Source:HGNC Symbol;Acc:HGNC:5344]	ENSG00000090339	3383	HGNC Symbol	ICAM1	protein_coding	5	5.2642	2.9391	5.8652	4.3684	0.00048979	0.0061257	-0.20303
Parkinsonism associated deglycase [Source:HGNC Symbol;Acc:HGNC:16369]	ENSG00000116288	11315	HGNC Symbol	PARK7	protein_coding	10	9.1177	1.4389	9.3387	4.3692	0.00048897	0.0061257	-0.20138
Yip1 domain family member 2 [Source:HGNC Symbol;Acc:HGNC:28476]	ENSG00000130733	78992	HGNC Symbol	YIPF2	protein_coding	12	1.4025	1.2562	1.2975	4.3692	0.00048894	0.0061257	-0.20131
ATPase H+ transporting V0 subunit e1 [Source:HGNC Symbol;Acc:HGNC:863]	ENSG00000113732	8992	HGNC Symbol	ATP6V0E1	protein_coding	4	8.876	0.85103	8.8673	4.368	0.00049021	0.0061257	-0.20386
zinc finger and BTB domain containing 49 [Source:HGNC Symbol;Acc:HGNC:19883]	ENSG00000168826	166793	HGNC Symbol	ZBTB49	protein_coding	6	3.3141	-2.0909	2.9376	-4.3676	0.00049058	0.0061257	-0.20462
zinc finger protein 483 [Source:HGNC Symbol;Acc:HGNC:23384]	ENSG00000173258	158399	HGNC Symbol	ZNF483	protein_coding	4	2.0844	-2.5076	1.3331	-4.3677	0.00049045	0.0061257	-0.20435
isocitrate dehydrogenase 3 (NAD(+)) alpha [Source:HGNC Symbol;Acc:HGNC:5384]	ENSG00000166411	3419	HGNC Symbol	IDH3A	protein_coding	24	6.0305	2.1111	6.3314	4.3643	0.00049391	0.0061543	-0.21128
ADP ribosylation factor like GTPase 2 [Source:HGNC Symbol;Acc:HGNC:693]	ENSG00000213465	402	HGNC Symbol	ARL2	protein_coding	6	3.652	0.80702	3.5145	4.3643	0.0004939	0.0061543	-0.21127
muscleblind like splicing regulator 2 [Source:HGNC Symbol;Acc:HGNC:16746]	ENSG00000139793	10150	HGNC Symbol	MBNL2	protein_coding	6	4.6535	-1.8219	4.5518	-4.3625	0.00049577	0.0061711	-0.21499
B-TFIID TATA-box binding protein associated factor 1 [Source:HGNC Symbol;Acc:HGNC:17307]	ENSG00000095564	9044	HGNC Symbol	BTAF1	protein_coding	4	5.1993	-1.0514	5.0953	-4.3617	0.00049658	0.0061748	-0.21662
NME/NM23 nucleoside diphosphate kinase 2 [Source:HGNC Symbol;Acc:HGNC:7850]	ENSG00000243678	4831	HGNC Symbol	NME2	protein_coding	9	2.2098	1.4466	1.9368	4.3604	0.00049789	0.0061847	-0.21921
solute carrier family 14 member 1 (Kidd blood group) [Source:HGNC Symbol;Acc:HGNC:10918]	ENSG00000141469	6563	HGNC Symbol	SLC14A1	protein_coding	20	2.8054	-2.8367	2.0832	-4.3593	0.00049902	0.0061922	-0.22144
src kinase associated phosphoprotein 1 [Source:HGNC Symbol;Acc:HGNC:15605]	ENSG00000141293	8631	HGNC Symbol	SKAP1	protein_coding	8	6.0104	-1.5355	5.756	-4.3578	0.00050058	0.0062053	-0.22453
iron responsive element binding protein 2 [Source:HGNC Symbol;Acc:HGNC:6115]	ENSG00000136381	3658	HGNC Symbol	IREB2	protein_coding	10	5.9188	-1.0988	5.7319	-4.3568	0.00050158	0.0062113	-0.2265
ribosomal protein L36a like [Source:HGNC Symbol;Acc:HGNC:10346]	ENSG00000165502	6166	HGNC Symbol	RPL36AL	protein_coding	1	9.6109	0.91559	9.7686	4.355	0.0005035	0.0062221	-0.23026
Janus kinase 1 [Source:HGNC Symbol;Acc:HGNC:6190]	ENSG00000162434	3716	HGNC Symbol	JAK1	protein_coding	6	7.6317	-1.7854	7.6595	-4.3554	0.0005031	0.0062221	-0.22949
small nucleolar RNA host gene 9 [Source:HGNC Symbol;Acc:HGNC:33102]	ENSG00000255198	NA	HGNC Symbol	SNHG9	lincRNA	2	4.0411	-1.4654	4.281	-4.3531	0.00050544	0.0062397	-0.23406
apolipoprotein L2 [Source:HGNC Symbol;Acc:HGNC:619]	ENSG00000128335	23780	HGNC Symbol	APOL2	protein_coding	9	6.8136	1.3946	7.2244	4.3522	0.00050641	0.0062452	-0.23595
lysine acetyltransferase 6A [Source:HGNC Symbol;Acc:HGNC:13013]	ENSG00000083168	7994	HGNC Symbol	KAT6A	protein_coding	17	5.7774	-1.5317	5.6712	-4.3512	0.00050747	0.0062454	-0.23801
REC8 meiotic recombination protein [Source:HGNC Symbol;Acc:HGNC:16879]	ENSG00000100918	9985	HGNC Symbol	REC8	protein_coding	13	2.825	-1.5747	2.2157	-4.3513	0.00050735	0.0062454	-0.23778
LETM1 domain containing 1 [Source:HGNC Symbol;Acc:HGNC:24241]	ENSG00000050426	25875	HGNC Symbol	LETMD1	protein_coding	38	5.7753	-1.0039	5.4833	-4.3505	0.00050821	0.0062481	-0.23946
platelet activating factor acetylhydrolase 1b catalytic subunit 3 [Source:HGNC Symbol;Acc:HGNC:8576]	ENSG00000079462	5050	HGNC Symbol	PAFAH1B3	protein_coding	8	2.2048	1.0695	1.736	4.3486	0.00051026	0.0062668	-0.24342
phosphatidylinositol glycan anchor biosynthesis class T [Source:HGNC Symbol;Acc:HGNC:14938]	ENSG00000124155	51604	HGNC Symbol	PIGT	protein_coding	72	7.4121	-0.847	7.7436	-4.3476	0.00051123	0.0062723	-0.24529
early growth response 1 [Source:HGNC Symbol;Acc:HGNC:3238]	ENSG00000120738	1958	HGNC Symbol	EGR1	protein_coding	1	3.3395	-4.2718	3.281	-4.3431	0.00051606	0.0063251	-0.25457
cyclin dependent kinase inhibitor 2C [Source:HGNC Symbol;Acc:HGNC:1789]	ENSG00000123080	1031	HGNC Symbol	CDKN2C	protein_coding	3	3.6695	-2.6527	2.8825	-4.342	0.00051718	0.0063324	-0.25672
NUAK family kinase 2 [Source:HGNC Symbol;Acc:HGNC:29558]	ENSG00000163545	81788	HGNC Symbol	NUAK2	protein_coding	1	1.7766	-3.1948	1.2938	-4.3415	0.00051772	0.0063326	-0.25775
mitochondrial ribosomal protein L13 [Source:HGNC Symbol;Acc:HGNC:14278]	ENSG00000172172	28998	HGNC Symbol	MRPL13	protein_coding	7	6.8798	1.4443	6.7258	4.3404	0.0005189	0.0063405	-0.26
DExD-box helicase 39A [Source:HGNC Symbol;Acc:HGNC:17821]	ENSG00000123136	10212	HGNC Symbol	DDX39A	protein_coding	21	8.6752	1.8036	8.7509	4.3368	0.00052286	0.0063695	-0.2675
BCL2, apoptosis regulator [Source:HGNC Symbol;Acc:HGNC:990]	ENSG00000171791	596	HGNC Symbol	BCL2	protein_coding	4	4.6092	1.3331	4.6298	4.3369	0.00052271	0.0063695	-0.2672
ILK associated serine/threonine phosphatase [Source:HGNC Symbol;Acc:HGNC:15566]	ENSG00000132323	80895	HGNC Symbol	ILKAP	protein_coding	12	4.5016	-1.1015	4.3991	-4.3376	0.00052191	0.0063695	-0.26571
FtsJ RNA methyltransferase homolog 1 [Source:HGNC Symbol;Acc:HGNC:13254]	ENSG00000068438	24140	HGNC Symbol	FTSJ1	protein_coding	13	5.2316	1.2918	5.7155	4.3362	0.00052345	0.0063701	-0.2686
glutamate rich WD repeat containing 1 [Source:HGNC Symbol;Acc:HGNC:21270]	ENSG00000105447	83743	HGNC Symbol	GRWD1	protein_coding	3	3.2238	1.3074	3.0804	4.3351	0.00052468	0.0063723	-0.27093
PZP, alpha-2-macroglobulin like [Source:HGNC Symbol;Acc:HGNC:9750]	ENSG00000126838	5858	HGNC Symbol	PZP	protein_coding	7	2.2042	-3.2295	1.485	-4.3351	0.00052469	0.0063723	-0.27094
Sp3 transcription factor [Source:HGNC Symbol;Acc:HGNC:11208]	ENSG00000172845	6670	HGNC Symbol	SP3	protein_coding	12	4.8128	-1.4438	4.5344	-4.3314	0.00052865	0.0064138	-0.27835
nucleolar protein with MIF4G domain 1 [Source:HGNC Symbol;Acc:HGNC:13244]	ENSG00000146909	64434	HGNC Symbol	NOM1	protein_coding	8	3.0603	0.75434	3.1457	4.3276	0.00053282	0.0064517	-0.28612
cell division cycle 40 [Source:HGNC Symbol;Acc:HGNC:17350]	ENSG00000168438	51362	HGNC Symbol	CDC40	protein_coding	7	6.0452	-1.0598	5.8645	-4.3276	0.00053284	0.0064517	-0.28615
ubiquitin conjugating enzyme E2 V2 [Source:HGNC Symbol;Acc:HGNC:12495]	ENSG00000169139	7336	HGNC Symbol	UBE2V2	protein_coding	8	7.5142	0.96277	7.4541	4.3265	0.00053408	0.0064573	-0.28844
zinc finger C3H1-type containing [Source:HGNC Symbol;Acc:HGNC:28328]	ENSG00000133858	196441	HGNC Symbol	ZFC3H1	protein_coding	12	4.5993	-1.4511	4.5414	-4.3262	0.00053438	0.0064573	-0.289
Era like 12S mitochondrial rRNA chaperone 1 [Source:HGNC Symbol;Acc:HGNC:3424]	ENSG00000132591	26284	HGNC Symbol	ERAL1	protein_coding	8	6.9528	1.0497	6.9595	4.3248	0.00053591	0.0064692	-0.29181
ring finger protein 24 [Source:HGNC Symbol;Acc:HGNC:13779]	ENSG00000101236	11237	HGNC Symbol	RNF24	protein_coding	4	4.346	1.0414	4.0143	4.324	0.00053686	0.0064742	-0.29357
phosphogluconate dehydrogenase [Source:HGNC Symbol;Acc:HGNC:8891]	ENSG00000142657	5226	HGNC Symbol	PGD	protein_coding	10	8.0176	2.6693	8.1607	4.3224	0.00053857	0.0064883	-0.29671
uridine-cytidine kinase 2 [Source:HGNC Symbol;Acc:HGNC:12562]	ENSG00000143179	7371	HGNC Symbol	UCK2	protein_coding	9	5.7237	1.5781	5.565	4.3209	0.00054025	0.0064955	-0.29978
PLAG1 like zinc finger 2 [Source:HGNC Symbol;Acc:HGNC:9047]	ENSG00000126003	5326	HGNC Symbol	PLAGL2	protein_coding	1	2.9502	1.2487	3.0862	4.3209	0.00054025	0.0064955	-0.29977
COBW domain containing 1 [Source:HGNC Symbol;Acc:HGNC:17134]	ENSG00000172785	55871	HGNC Symbol	CBWD1	protein_coding	29	5.6984	1.516	5.5962	4.3179	0.00054363	0.0065076	-0.30593
immediate early response 3 [Source:HGNC Symbol;Acc:HGNC:5392]	ENSG00000137331	8870	HGNC Symbol	IER3	protein_coding	2	3.0064	1.4805	3.4439	4.3195	0.00054183	0.0065076	-0.30265
tubulin gamma complex associated protein 5 [Source:HGNC Symbol;Acc:HGNC:18600]	ENSG00000275835	114791	HGNC Symbol	TUBGCP5	protein_coding	9	4.0861	-1.011	3.5777	-4.3186	0.00054288	0.0065076	-0.30457
solute carrier family 23 member 2 [Source:HGNC Symbol;Acc:HGNC:10973]	ENSG00000089057	9962	HGNC Symbol	SLC23A2	protein_coding	5	3.4066	-1.2514	3.1896	-4.3176	0.00054398	0.0065076	-0.30656
leucine rich repeat containing G protein-coupled receptor 6 [Source:HGNC Symbol;Acc:HGNC:19719]	ENSG00000133067	59352	HGNC Symbol	LGR6	protein_coding	8	2.8156	-3.3547	2.1007	-4.318	0.00054358	0.0065076	-0.30584
mitochondrial ribosomal protein S2 [Source:HGNC Symbol;Acc:HGNC:14495]	ENSG00000122140	51116	HGNC Symbol	MRPS2	protein_coding	8	2.6732	0.81393	2.9951	4.317	0.00054467	0.0065094	-0.30781
solute carrier family 35 member C1 [Source:HGNC Symbol;Acc:HGNC:20197]	ENSG00000181830	55343	HGNC Symbol	SLC35C1	protein_coding	4	2.2258	0.90829	2.2502	4.3164	0.00054536	0.0065112	-0.30906
RNA polymerase I subunit A [Source:HGNC Symbol;Acc:HGNC:17264]	ENSG00000068654	25885	HGNC Symbol	POLR1A	protein_coding	10	4.9585	0.92747	4.705	4.3153	0.00054661	0.0065196	-0.31132
phosphatidylinositol-4,5-bisphosphate 4-phosphatase 1 [Source:HGNC Symbol;Acc:HGNC:19299]	ENSG00000165782	90809	HGNC Symbol	PIP4P1	protein_coding	7	3.4886	-1.5871	3.2921	-4.3141	0.00054794	0.006529	-0.31372
ELOVL fatty acid elongase 6 [Source:HGNC Symbol;Acc:HGNC:15829]	ENSG00000170522	79071	HGNC Symbol	ELOVL6	protein_coding	8	6.8318	1.703	6.8671	4.311	0.00055145	0.0065509	-0.32002
macoilin 1 [Source:HGNC Symbol;Acc:HGNC:25572]	ENSG00000204178	55219	HGNC Symbol	MACO1	protein_coding	4	3.3697	-0.81101	3.2782	-4.3106	0.00055197	0.0065509	-0.32094
TGF-beta activated kinase 1 (MAP3K7) binding protein 3 [Source:HGNC Symbol;Acc:HGNC:30681]	ENSG00000157625	257397	HGNC Symbol	TAB3	protein_coding	6	3.1272	-1.0218	3.1309	-4.3114	0.00055099	0.0065509	-0.31919
chromosome 5 open reading frame 56 [Source:HGNC Symbol;Acc:HGNC:33838]	ENSG00000197536	441108	HGNC Symbol	C5orf56	processed_transcript	7	3.8716	-1.9516	3.9315	-4.3115	0.00055096	0.0065509	-0.31913
defender against cell death 1 [Source:HGNC Symbol;Acc:HGNC:2664]	ENSG00000129562	1603	HGNC Symbol	DAD1	protein_coding	5	8.2748	0.94852	8.2899	4.3093	0.00055348	0.0065575	-0.32363
chromosome 12 open reading frame 43 [Source:HGNC Symbol;Acc:HGNC:25719]	ENSG00000157895	64897	HGNC Symbol	C12orf43	protein_coding	9	5.129	0.72463	4.905	4.3091	0.00055362	0.0065575	-0.32388
capping actin protein of muscle Z-line subunit alpha 1 [Source:HGNC Symbol;Acc:HGNC:1488]	ENSG00000116489	829	HGNC Symbol	CAPZA1	protein_coding	6	10.69	1.0751	10.609	4.3086	0.0005542	0.006558	-0.32493
ring finger protein 157 [Source:HGNC Symbol;Acc:HGNC:29402]	ENSG00000141576	114804	HGNC Symbol	RNF157	protein_coding	10	5.2231	1.7216	4.9394	4.3054	0.00055789	0.0065897	-0.33147
RuvB like AAA ATPase 2 [Source:HGNC Symbol;Acc:HGNC:10475]	ENSG00000183207	10856	HGNC Symbol	RUVBL2	protein_coding	14	5.1911	1.4277	5.3633	4.3049	0.00055854	0.0065897	-0.33261
6-phosphofructo-2-kinase/fructose-2,6-biphosphatase 3 [Source:HGNC Symbol;Acc:HGNC:8874]	ENSG00000170525	5209	HGNC Symbol	PFKFB3	protein_coding	19	2.7979	1.2674	2.5598	4.305	0.00055835	0.0065897	-0.33229
BCAS2, pre-mRNA processing factor [Source:HGNC Symbol;Acc:HGNC:975]	ENSG00000116752	10286	HGNC Symbol	BCAS2	protein_coding	2	7.6429	-0.79706	7.7701	-4.3042	0.00055934	0.0065928	-0.33403
suppressor of variegation 3-9 homolog 2 [Source:HGNC Symbol;Acc:HGNC:17287]	ENSG00000152455	79723	HGNC Symbol	SUV39H2	protein_coding	8	3.7134	1.575	3.4315	4.3023	0.0005615	0.0066052	-0.33782
cysteine sulfinic acid decarboxylase [Source:HGNC Symbol;Acc:HGNC:18966]	ENSG00000139631	51380	HGNC Symbol	CSAD	protein_coding	20	3.2491	-1.0789	2.9054	-4.3025	0.00056127	0.0066052	-0.33742
MDM4, p53 regulator [Source:HGNC Symbol;Acc:HGNC:6974]	ENSG00000198625	4194	HGNC Symbol	MDM4	protein_coding	17	6.4775	-1.2494	6.5214	-4.2998	0.00056441	0.0066329	-0.34292
barrier to autointegration factor 1 [Source:HGNC Symbol;Acc:HGNC:17397]	ENSG00000175334	8815	HGNC Symbol	BANF1	protein_coding	8	7.6763	1.2032	7.7769	4.2989	0.00056544	0.0066386	-0.34473
chromosome 17 open reading frame 80 [Source:HGNC Symbol;Acc:HGNC:29601]	ENSG00000141219	55028	HGNC Symbol	C17orf80	protein_coding	9	4.3003	1.4061	3.8968	4.298	0.00056659	0.0066417	-0.34672
catenin delta 1 [Source:HGNC Symbol;Acc:HGNC:2515]	ENSG00000198561	1500	HGNC Symbol	CTNND1	protein_coding	38	2.8572	-1.9416	2.316	-4.2978	0.00056682	0.0066417	-0.34713
SWI/SNF related, matrix associated, actin dependent regulator of chromatin, subfamily d, member 2 [Source:HGNC Symbol;Acc:HGNC:11107]	ENSG00000108604	6603	HGNC Symbol	SMARCD2	protein_coding	12	3.8612	-0.84454	3.8126	-4.2944	0.00057076	0.0066814	-0.35396
zinc finger protein 720 [Source:NCBI gene;Acc:124411]	ENSG00000197302	124411	NCBI gene	ZNF720	protein_coding	13	5.0909	1.0733	4.9586	4.2918	0.00057386	0.0066915	-0.3593
thioredoxin like 4B [Source:HGNC Symbol;Acc:HGNC:26041]	ENSG00000140830	54957	HGNC Symbol	TXNL4B	protein_coding	6	4.6918	0.83264	4.5174	4.2922	0.00057343	0.0066915	-0.35856
poly(ADP-ribose) polymerase family member 6 [Source:HGNC Symbol;Acc:HGNC:26921]	ENSG00000137817	56965	HGNC Symbol	PARP6	protein_coding	23	4.7041	-0.95355	4.8343	-4.2923	0.00057328	0.0066915	-0.35831
ubiquitin like with PHD and ring finger domains 2 [Source:HGNC Symbol;Acc:HGNC:12557]	ENSG00000147854	115426	HGNC Symbol	UHRF2	protein_coding	13	4.5761	-1.7663	4.3935	-4.2928	0.00057265	0.0066915	-0.35722
hematopoietic SH2 domain containing [Source:HGNC Symbol;Acc:HGNC:24920]	ENSG00000196684	84941	HGNC Symbol	HSH2D	protein_coding	8	7.1668	-2.1208	6.7267	-4.2897	0.0005764	0.0067146	-0.36366
solute carrier family 27 member 2 [Source:HGNC Symbol;Acc:HGNC:10996]	ENSG00000140284	11001	HGNC Symbol	SLC27A2	protein_coding	4	2.827	3.1909	2.6689	4.289	0.00057717	0.0067171	-0.36498
transmembrane protein 185B [Source:HGNC Symbol;Acc:HGNC:18896]	ENSG00000226479	79134	HGNC Symbol	TMEM185B	protein_coding	1	1.8086	1.5279	2.0693	4.287	0.00057953	0.0067249	-0.36899
interleukin 27 receptor subunit alpha [Source:HGNC Symbol;Acc:HGNC:17290]	ENSG00000104998	9466	HGNC Symbol	IL27RA	protein_coding	1	5.4469	1.2041	5.4242	4.2875	0.000579	0.0067249	-0.3681
peroxiredoxin 6 [Source:HGNC Symbol;Acc:HGNC:16753]	ENSG00000117592	9588	HGNC Symbol	PRDX6	protein_coding	3	7.8059	0.67952	7.7728	4.2878	0.00057867	0.0067249	-0.36752
makorin ring finger protein 1 [Source:HGNC Symbol;Acc:HGNC:7112]	ENSG00000133606	23608	HGNC Symbol	MKRN1	protein_coding	16	5.5731	-2.1052	5.2134	-4.2836	0.00058372	0.0067669	-0.3761
regulator of MON1-CCZ1 [Source:HGNC Symbol;Acc:HGNC:24326]	ENSG00000141452	29919	HGNC Symbol	RMC1	protein_coding	14	4.3081	-1.6044	4.0975	-4.2799	0.00058813	0.0068115	-0.38352
ataxin 7 [Source:HGNC Symbol;Acc:HGNC:10560]	ENSG00000163635	6314	HGNC Symbol	ATXN7	protein_coding	11	5.0747	-1.5038	4.8846	-4.2788	0.00058957	0.0068216	-0.38594
nucleoporin 214 [Source:HGNC Symbol;Acc:HGNC:8064]	ENSG00000126883	8021	HGNC Symbol	NUP214	protein_coding	32	5.6753	-0.84316	5.7072	-4.2771	0.00059155	0.0068379	-0.38924
chaperonin containing TCP1 subunit 3 [Source:HGNC Symbol;Acc:HGNC:1616]	ENSG00000163468	7203	HGNC Symbol	CCT3	protein_coding	16	9.1496	1.43	9.3465	4.2758	0.00059323	0.0068507	-0.39203
mitochondrial ribosomal protein L15 [Source:HGNC Symbol;Acc:HGNC:14054]	ENSG00000137547	29088	HGNC Symbol	MRPL15	protein_coding	3	4.7346	1.5812	4.5061	4.2746	0.00059471	0.0068612	-0.39449
CD48 molecule [Source:HGNC Symbol;Acc:HGNC:1683]	ENSG00000117091	962	HGNC Symbol	CD48	protein_coding	3	9.0284	2.5952	9.5354	4.2716	0.00059841	0.0068823	-0.40061
methyltransferase like 5 [Source:HGNC Symbol;Acc:HGNC:25006]	ENSG00000138382	29081	HGNC Symbol	METTL5	protein_coding	12	5.4329	1.1256	5.4075	4.2712	0.00059884	0.0068823	-0.40131
NADH:ubiquinone oxidoreductase subunit B5 [Source:HGNC Symbol;Acc:HGNC:7700]	ENSG00000136521	4711	HGNC Symbol	NDUFB5	protein_coding	16	6.3179	1.076	5.913	4.2719	0.00059806	0.0068823	-0.40003
F-box protein 11 [Source:HGNC Symbol;Acc:HGNC:13590]	ENSG00000138081	80204	HGNC Symbol	FBXO11	protein_coding	10	3.6996	-1.545	3.4079	-4.2716	0.00059836	0.0068823	-0.40052
ABRA C-terminal like [Source:HGNC Symbol;Acc:HGNC:21230]	ENSG00000146386	58527	HGNC Symbol	ABRACL	protein_coding	2	7.4749	1.3182	6.9908	4.2701	0.0006003	0.0068859	-0.40372
small ubiquitin-like modifier 2 [Source:HGNC Symbol;Acc:HGNC:11125]	ENSG00000188612	6613	HGNC Symbol	SUMO2	protein_coding	3	8.4511	0.69063	8.4022	4.2701	0.00060026	0.0068859	-0.40365
THO complex 6 [Source:HGNC Symbol;Acc:HGNC:28369]	ENSG00000131652	79228	HGNC Symbol	THOC6	protein_coding	10	3.6485	1.1706	3.5133	4.2691	0.00060148	0.0068907	-0.40565
apurinic/apyrimidinic endodeoxyribonuclease 2 [Source:HGNC Symbol;Acc:HGNC:17889]	ENSG00000169188	27301	HGNC Symbol	APEX2	protein_coding	2	5.9957	0.9145	5.8087	4.2688	0.00060186	0.0068907	-0.40628
RNA polymerase III subunit H [Source:HGNC Symbol;Acc:HGNC:30349]	ENSG00000100413	171568	HGNC Symbol	POLR3H	protein_coding	9	3.085	1.5536	3.1431	4.2679	0.00060303	0.0068908	-0.40819
N-myristoyltransferase 1 [Source:HGNC Symbol;Acc:HGNC:7857]	ENSG00000136448	4836	HGNC Symbol	NMT1	protein_coding	13	6.8137	0.70532	6.9782	4.2679	0.00060302	0.0068908	-0.40818
myosin regulatory light chain interacting protein [Source:HGNC Symbol;Acc:HGNC:21155]	ENSG00000007944	29116	HGNC Symbol	MYLIP	protein_coding	2	4.6098	-2.7294	4.5773	-4.2673	0.00060375	0.0068925	-0.40936
family with sequence similarity 169 member A [Source:HGNC Symbol;Acc:HGNC:29138]	ENSG00000198780	26049	HGNC Symbol	FAM169A	protein_coding	7	2.9423	-1.9837	2.8297	-4.2664	0.00060491	0.0068992	-0.41126
lectin, mannose binding 2 like [Source:HGNC Symbol;Acc:HGNC:19263]	ENSG00000114988	81562	HGNC Symbol	LMAN2L	protein_coding	9	5.3494	1.3096	5.4983	4.2656	0.0006059	0.0069022	-0.41288
HPS1, biogenesis of lysosomal organelles complex 3 subunit 1 [Source:HGNC Symbol;Acc:HGNC:5163]	ENSG00000107521	3257	HGNC Symbol	HPS1	protein_coding	15	5.554	-1.3426	5.2604	-4.2652	0.00060633	0.0069022	-0.41356
DOT1 like histone lysine methyltransferase [Source:HGNC Symbol;Acc:HGNC:24948]	ENSG00000104885	84444	HGNC Symbol	DOT1L	protein_coding	9	2.5093	0.99324	2.3071	4.2629	0.00060931	0.0069296	-0.4184
testis expressed 261 [Source:HGNC Symbol;Acc:HGNC:30712]	ENSG00000144043	113419	HGNC Symbol	TEX261	protein_coding	6	4.3816	1.0025	4.5916	4.2609	0.00061177	0.006951	-0.42238
tissue specific transplantation antigen P35B [Source:HGNC Symbol;Acc:HGNC:12390]	ENSG00000104522	7264	HGNC Symbol	TSTA3	protein_coding	16	5.8302	0.88147	5.9997	4.2584	0.00061495	0.0069739	-0.42749
RB binding protein 6, ubiquitin ligase [Source:HGNC Symbol;Acc:HGNC:9889]	ENSG00000122257	5930	HGNC Symbol	RBBP6	protein_coding	14	6.4687	-0.98634	6.5444	-4.2585	0.00061484	0.0069739	-0.4273
TELO2 interacting protein 2 [Source:HGNC Symbol;Acc:HGNC:26262]	ENSG00000129696	80185	HGNC Symbol	TTI2	protein_coding	6	5.7637	0.71428	5.5167	4.2553	0.0006189	0.0070094	-0.43379
serine and arginine rich splicing factor 11 [Source:HGNC Symbol;Acc:HGNC:10782]	ENSG00000116754	9295	HGNC Symbol	SRSF11	protein_coding	16	7.5028	-1.1802	7.6323	-4.2551	0.00061925	0.0070094	-0.43436
farnesyl diphosphate synthase [Source:HGNC Symbol;Acc:HGNC:3631]	ENSG00000160752	2224	HGNC Symbol	FDPS	protein_coding	21	8.5054	1.2416	8.6392	4.2529	0.00062209	0.0070349	-0.43886
EBNA1 binding protein 2 [Source:HGNC Symbol;Acc:HGNC:15531]	ENSG00000117395	10969	HGNC Symbol	EBNA1BP2	protein_coding	9	5.3984	2.3277	5.789	4.2511	0.00062432	0.0070433	-0.44239
Ran GTPase activating protein 1 [Source:HGNC Symbol;Acc:HGNC:9854]	ENSG00000100401	5905	HGNC Symbol	RANGAP1	protein_coding	7	4.1673	0.93929	4.0311	4.2512	0.00062425	0.0070433	-0.44229
tubulin folding cofactor C [Source:HGNC Symbol;Acc:HGNC:11580]	ENSG00000124659	6903	HGNC Symbol	TBCC	protein_coding	1	4.7829	-1.6441	4.5398	-4.2509	0.00062459	0.0070433	-0.44282
RAB29, member RAS oncogene family [Source:HGNC Symbol;Acc:HGNC:9789]	ENSG00000117280	8934	HGNC Symbol	RAB29	protein_coding	9	8.8531	1.0263	9.1169	4.2452	0.00063204	0.0071205	-0.4545
ATP/GTP binding protein 1 [Source:HGNC Symbol;Acc:HGNC:17258]	ENSG00000135049	23287	HGNC Symbol	AGTPBP1	protein_coding	8	5.0874	-2.3712	4.8275	-4.2432	0.00063466	0.0071434	-0.45859
ribosome production factor 2 homolog [Source:HGNC Symbol;Acc:HGNC:20870]	ENSG00000197498	84154	HGNC Symbol	RPF2	protein_coding	4	5.8524	2.1838	6	4.2428	0.00063528	0.0071436	-0.45954
phosphoprotein membrane anchor with glycosphingolipid microdomains 1 [Source:HGNC Symbol;Acc:HGNC:30043]	ENSG00000076641	55824	HGNC Symbol	PAG1	protein_coding	4	5.7141	1.1901	5.6191	4.2401	0.00063874	0.0071576	-0.4649
mitochondrial ribosomal protein L36 [Source:HGNC Symbol;Acc:HGNC:14490]	ENSG00000171421	64979	HGNC Symbol	MRPL36	protein_coding	5	6.5443	1.177	6.5009	4.2407	0.00063793	0.0071576	-0.46365
NADH:ubiquinone oxidoreductase subunit B6 [Source:HGNC Symbol;Acc:HGNC:7701]	ENSG00000165264	4712	HGNC Symbol	NDUFB6	protein_coding	3	5.6316	0.81972	5.6452	4.2413	0.00063719	0.0071576	-0.46251
zinc finger protein 44 [Source:HGNC Symbol;Acc:HGNC:13110]	ENSG00000197857	51710	HGNC Symbol	ZNF44	protein_coding	8	5.3279	-1.6453	5.1073	-4.2397	0.00063928	0.0071576	-0.46573
terminal nucleotidyltransferase 5C [Source:HGNC Symbol;Acc:HGNC:24712]	ENSG00000183508	54855	HGNC Symbol	TENT5C	protein_coding	1	6.1651	-1.9411	6.4229	-4.2396	0.00063951	0.0071576	-0.46608
abhydrolase domain containing 17A [Source:HGNC Symbol;Acc:HGNC:28756]	ENSG00000129968	81926	HGNC Symbol	ABHD17A	protein_coding	6	1.8561	-2.6855	1.6331	-4.2389	0.00064044	0.0071613	-0.46751
tumor protein p53 [Source:HGNC Symbol;Acc:HGNC:11998]	ENSG00000141510	7157	HGNC Symbol	TP53	protein_coding	29	7.1876	1.3686	7.3242	4.2373	0.00064257	0.0071784	-0.47079
apoptosis inducing factor, mitochondria associated 2 [Source:HGNC Symbol;Acc:HGNC:21411]	ENSG00000042286	84883	HGNC Symbol	AIFM2	protein_coding	4	3.5887	1.4449	3.5065	4.2355	0.00064486	0.0071947	-0.4743
centrosomal protein 78 [Source:HGNC Symbol;Acc:HGNC:25740]	ENSG00000148019	84131	HGNC Symbol	CEP78	protein_coding	24	5.8811	-2.5231	5.6556	-4.2353	0.00064522	0.0071947	-0.47485
transmembrane protein 258 [Source:HGNC Symbol;Acc:HGNC:1164]	ENSG00000134825	746	HGNC Symbol	TMEM258	protein_coding	8	7.185	1.0681	7.2899	4.2341	0.00064677	0.0072052	-0.47721
armadillo repeat containing 1 [Source:HGNC Symbol;Acc:HGNC:17684]	ENSG00000104442	55156	HGNC Symbol	ARMC1	protein_coding	6	6.3004	0.94242	6.1247	4.2317	0.00065001	0.0072346	-0.48214
nucleophosmin/nucleoplasmin 3 [Source:HGNC Symbol;Acc:HGNC:7931]	ENSG00000107833	10360	HGNC Symbol	NPM3	protein_coding	4	3.0867	2.5705	3.4769	4.2312	0.00065075	0.0072361	-0.48326
deltex E3 ubiquitin ligase 3 [Source:HGNC Symbol;Acc:HGNC:24457]	ENSG00000178498	196403	HGNC Symbol	DTX3	protein_coding	9	2.8576	-2.503	2.7081	-4.2304	0.00065181	0.0072412	-0.48486
RAB11 family interacting protein 4 [Source:HGNC Symbol;Acc:HGNC:30267]	ENSG00000131242	84440	HGNC Symbol	RAB11FIP4	protein_coding	11	4.039	-2.3035	3.5638	-4.2295	0.00065302	0.0072479	-0.48669
24-dehydrocholesterol reductase [Source:HGNC Symbol;Acc:HGNC:2859]	ENSG00000116133	1718	HGNC Symbol	DHCR24	protein_coding	12	5.1821	2.347	5.1086	4.2282	0.0006548	0.0072586	-0.48937
O-linked N-acetylglucosamine (GlcNAc) transferase [Source:HGNC Symbol;Acc:HGNC:8127]	ENSG00000147162	8473	HGNC Symbol	OGT	protein_coding	11	7.2515	-1.6833	7.1451	-4.2279	0.00065519	0.0072586	-0.48996
glutamic-oxaloacetic transaminase 2 [Source:HGNC Symbol;Acc:HGNC:4433]	ENSG00000125166	2806	HGNC Symbol	GOT2	protein_coding	7	5.8655	0.90437	5.8424	4.2273	0.000656	0.0072609	-0.49118
novel transcript	ENSG00000273702	NA	Clone-based (Ensembl) gene	AC091271.1	lincRNA	1	1.3958	-1.3555	1.7797	-4.2256	0.0006583	0.0072795	-0.49462
ARP5 actin related protein 5 homolog [Source:HGNC Symbol;Acc:HGNC:14671]	ENSG00000101442	79913	HGNC Symbol	ACTR5	protein_coding	1	2.2385	-0.99955	2.287	-4.2251	0.000659	0.0072805	-0.49567
phosphoserine aminotransferase 1 [Source:HGNC Symbol;Acc:HGNC:19129]	ENSG00000135069	29968	HGNC Symbol	PSAT1	protein_coding	2	5.7147	5.4189	5.9719	4.2246	0.00065975	0.0072821	-0.49679
mitochondrial ribosomal protein L49 [Source:HGNC Symbol;Acc:HGNC:1176]	ENSG00000149792	740	HGNC Symbol	MRPL49	protein_coding	9	7.0828	0.80137	7.0382	4.2219	0.00066336	0.0073153	-0.50218
ADP ribosylation factor like GTPase 13B [Source:HGNC Symbol;Acc:HGNC:25419]	ENSG00000169379	200894	HGNC Symbol	ARL13B	protein_coding	10	3.0826	0.72086	2.88	4.2203	0.00066565	0.0073271	-0.50557
DEAD-box helicase 42 [Source:HGNC Symbol;Acc:HGNC:18676]	ENSG00000198231	11325	HGNC Symbol	DDX42	protein_coding	19	5.4383	-1.0675	5.5119	-4.2207	0.0006651	0.0073271	-0.50475
DENN domain containing 6A [Source:HGNC Symbol;Acc:HGNC:26635]	ENSG00000174839	201627	HGNC Symbol	DENND6A	protein_coding	6	4.1922	-1.5148	3.9936	-4.2192	0.00066718	0.0073372	-0.50783
DEAD-box helicase 47 [Source:HGNC Symbol;Acc:HGNC:18682]	ENSG00000213782	51202	HGNC Symbol	DDX47	protein_coding	12	3.0454	-1.4113	3.1677	-4.2179	0.00066893	0.0073496	-0.51041
family with sequence similarity 216 member A [Source:HGNC Symbol;Acc:HGNC:30180]	ENSG00000204856	29902	HGNC Symbol	FAM216A	protein_coding	6	2.3168	1.204	2.1831	4.2172	0.00066984	0.0073529	-0.51175
novel transcript, antisense to GNG2	ENSG00000258928	NA	Clone-based (Ensembl) gene	AL358333.2	antisense	1	1.9351	-1.5736	2.1326	-4.2124	0.00067666	0.007421	-0.52173
branched chain ketoacid dehydrogenase kinase [Source:HGNC Symbol;Acc:HGNC:16902]	ENSG00000103507	10295	HGNC Symbol	BCKDK	protein_coding	10	2.0321	1.4427	2.2457	4.2089	0.00068159	0.0074682	-0.52889
serine/threonine kinase 3 [Source:HGNC Symbol;Acc:HGNC:11406]	ENSG00000104375	6788	HGNC Symbol	STK3	protein_coding	20	4.7083	1.1868	4.645	4.2057	0.00068604	0.0075101	-0.53529
SEC13 homolog, nuclear pore and COPII coat complex component [Source:HGNC Symbol;Acc:HGNC:10697]	ENSG00000157020	6396	HGNC Symbol	SEC13	protein_coding	19	7.1264	1.396	7.5086	4.2031	0.00068983	0.0075104	-0.54072
transmembrane protein 186 [Source:HGNC Symbol;Acc:HGNC:24530]	ENSG00000184857	25880	HGNC Symbol	TMEM186	protein_coding	2	3.848	1.3424	3.3651	4.2046	0.00068772	0.0075104	-0.5377
prostaglandin E synthase 3 [Source:HGNC Symbol;Acc:HGNC:16049]	ENSG00000110958	10728	HGNC Symbol	PTGES3	protein_coding	7	6.8985	0.95628	6.9566	4.2033	0.00068957	0.0075104	-0.54036
anaphase promoting complex subunit 11 [Source:HGNC Symbol;Acc:HGNC:14452]	ENSG00000141552	51529	HGNC Symbol	ANAPC11	protein_coding	23	7.0391	0.71869	7.2658	4.2039	0.0006886	0.0075104	-0.53896
BRCA1 associated protein [Source:HGNC Symbol;Acc:HGNC:1099]	ENSG00000089234	8315	HGNC Symbol	BRAP	protein_coding	3	4.0594	-1.2464	3.7146	-4.2037	0.00068895	0.0075104	-0.53946
lysine methyltransferase 2E [Source:HGNC Symbol;Acc:HGNC:18541]	ENSG00000005483	55904	HGNC Symbol	KMT2E	protein_coding	16	7.2309	-1.3668	7.3339	-4.2041	0.00068833	0.0075104	-0.53857
zinc finger protein 691 [Source:HGNC Symbol;Acc:HGNC:28028]	ENSG00000164011	51058	HGNC Symbol	ZNF691	protein_coding	9	3.9892	1.4003	3.5535	4.2018	0.00069163	0.0075218	-0.54329
ubiquilin 1 [Source:HGNC Symbol;Acc:HGNC:12508]	ENSG00000135018	29979	HGNC Symbol	UBQLN1	protein_coding	6	4.5285	-0.85049	4.4873	-4.2015	0.00069213	0.0075218	-0.544
cyclin D2 [Source:HGNC Symbol;Acc:HGNC:1583]	ENSG00000118971	894	HGNC Symbol	CCND2	protein_coding	4	9.03	3.0356	9.7937	4.2004	0.00069376	0.0075327	-0.54631
BRI3 binding protein [Source:HGNC Symbol;Acc:HGNC:14251]	ENSG00000184992	140707	HGNC Symbol	BRI3BP	protein_coding	1	4.3317	1.0463	3.9465	4.1995	0.00069505	0.0075399	-0.54815
nucleoporin 35 [Source:HGNC Symbol;Acc:HGNC:29797]	ENSG00000163002	129401	HGNC Symbol	NUP35	protein_coding	10	4.8086	1.2726	4.6432	4.1989	0.00069586	0.0075418	-0.54929
ALG14, UDP-N-acetylglucosaminyltransferase subunit [Source:HGNC Symbol;Acc:HGNC:28287]	ENSG00000172339	199857	HGNC Symbol	ALG14	protein_coding	3	4.9133	0.97557	4.5055	4.1961	0.00069993	0.0075791	-0.55504
golgin A6 family-like 9 [Source:HGNC Symbol;Acc:HGNC:37229]	ENSG00000197978	440295	HGNC Symbol	GOLGA6L9	protein_coding	3	3.0093	1.0102	2.6694	4.1945	0.00070227	0.0075838	-0.55832
SPOUT domain containing methyltransferase 1 [Source:HGNC Symbol;Acc:HGNC:26933]	ENSG00000198917	51490	HGNC Symbol	SPOUT1	protein_coding	5	3.7226	0.8598	3.6914	4.195	0.00070151	0.0075838	-0.55726
zinc finger and SCAN domain containing 12 [Source:HGNC Symbol;Acc:HGNC:13172]	ENSG00000158691	9753	HGNC Symbol	ZSCAN12	protein_coding	2	3.9701	-1.5964	3.4811	-4.1946	0.00070208	0.0075838	-0.55806
TNF receptor superfamily member 18 [Source:HGNC Symbol;Acc:HGNC:11914]	ENSG00000186891	8784	HGNC Symbol	TNFRSF18	protein_coding	4	2.8913	2.3055	3.5431	4.19	0.00070885	0.0076059	-0.56751
translocase of inner mitochondrial membrane 21 [Source:HGNC Symbol;Acc:HGNC:25010]	ENSG00000075336	29090	HGNC Symbol	TIMM21	protein_coding	6	6.0268	1.1501	6.0801	4.1916	0.00070644	0.0076059	-0.56416
ATP synthase membrane subunit f [Source:HGNC Symbol;Acc:HGNC:848]	ENSG00000241468	9551	HGNC Symbol	ATP5MF	protein_coding	12	7.0428	1.029	6.9169	4.1896	0.00070939	0.0076059	-0.56826
secretory carrier membrane protein 3 [Source:HGNC Symbol;Acc:HGNC:10565]	ENSG00000116521	10067	HGNC Symbol	SCAMP3	protein_coding	9	6.635	0.85053	6.789	4.1925	0.00070515	0.0076059	-0.56235
TATA-box binding protein associated factor 11 [Source:HGNC Symbol;Acc:HGNC:11544]	ENSG00000064995	6882	HGNC Symbol	TAF11	protein_coding	3	4.3097	-0.8401	4.3426	-4.1922	0.00070566	0.0076059	-0.56307
pellino E3 ubiquitin protein ligase 1 [Source:HGNC Symbol;Acc:HGNC:8827]	ENSG00000197329	57162	HGNC Symbol	PELI1	protein_coding	4	2.8568	-1.1624	2.9097	-4.1897	0.00070923	0.0076059	-0.56804
DENN domain containing 3 [Source:HGNC Symbol;Acc:HGNC:29134]	ENSG00000105339	22898	HGNC Symbol	DENND3	protein_coding	22	4.5884	-1.3117	4.095	-4.19	0.00070882	0.0076059	-0.56747
ubiquitin specific peptidase 30 [Source:HGNC Symbol;Acc:HGNC:20065]	ENSG00000135093	84749	HGNC Symbol	USP30	protein_coding	10	3.2348	-1.6853	3.2519	-4.1908	0.00070774	0.0076059	-0.56597
tRNA isopentenyltransferase 1 [Source:HGNC Symbol;Acc:HGNC:20286]	ENSG00000043514	54802	HGNC Symbol	TRIT1	protein_coding	16	4.2557	1.191	4.1423	4.1863	0.00071431	0.0076411	-0.57507
chromosome 1 open reading frame 52 [Source:HGNC Symbol;Acc:HGNC:24871]	ENSG00000162642	148423	HGNC Symbol	C1orf52	protein_coding	4	4.7623	-0.70254	4.7275	-4.1863	0.00071428	0.0076411	-0.57503
SR-related CTD associated factor 4 [Source:HGNC Symbol;Acc:HGNC:19304]	ENSG00000156304	57466	HGNC Symbol	SCAF4	protein_coding	6	3.744	-1.0014	3.5173	-4.1861	0.00071458	0.0076411	-0.57544
general transcription factor IIH subunit 5 [Source:HGNC Symbol;Acc:HGNC:21157]	ENSG00000272047	404672	HGNC Symbol	GTF2H5	protein_coding	2	5.1899	0.8412	4.8722	4.1848	0.00071651	0.0076481	-0.5781
teneurin transmembrane protein 1 [Source:HGNC Symbol;Acc:HGNC:8117]	ENSG00000009694	10178	HGNC Symbol	TENM1	protein_coding	3	3.1837	-2.6976	2.4866	-4.1849	0.0007164	0.0076481	-0.57795
PHD finger protein 3 [Source:HGNC Symbol;Acc:HGNC:8921]	ENSG00000118482	23469	HGNC Symbol	PHF3	protein_coding	12	5.443	-1.799	5.2232	-4.1806	0.00072282	0.0077086	-0.58674
proteasome activator subunit 4 [Source:HGNC Symbol;Acc:HGNC:20635]	ENSG00000068878	23198	HGNC Symbol	PSME4	protein_coding	9	5.8101	-1.3277	5.6652	-4.1791	0.00072518	0.007722	-0.58994
nuclear paraspeckle assembly transcript 1 [Source:HGNC Symbol;Acc:HGNC:30815]	ENSG00000245532	NA	HGNC Symbol	NEAT1	lincRNA	8	6.5862	-2.23	6.4947	-4.1789	0.00072537	0.007722	-0.5902
casein kinase 1 epsilon [Source:HGNC Symbol;Acc:HGNC:2453]	ENSG00000213923	1454	HGNC Symbol	CSNK1E	protein_coding	15	4.003	-1.2189	4.0086	-4.1782	0.00072652	0.0077274	-0.59176
dynein cytoplasmic 1 intermediate chain 2 [Source:HGNC Symbol;Acc:HGNC:2964]	ENSG00000077380	1781	HGNC Symbol	DYNC1I2	protein_coding	25	6.5287	0.99567	6.4175	4.1763	0.0007294	0.0077512	-0.59567
integrin subunit beta 7 [Source:HGNC Symbol;Acc:HGNC:6162]	ENSG00000139626	3695	HGNC Symbol	ITGB7	protein_coding	14	2.0691	-3.2207	1.604	-4.1757	0.00073018	0.0077525	-0.59671
pyridoxamine 5'-phosphate oxidase [Source:HGNC Symbol;Acc:HGNC:30260]	ENSG00000108439	55163	HGNC Symbol	PNPO	protein_coding	17	4.8443	1.4582	4.7615	4.1736	0.00073347	0.0077807	-0.60114
G3BP stress granule assembly factor 1 [Source:HGNC Symbol;Acc:HGNC:30292]	ENSG00000145907	10146	HGNC Symbol	G3BP1	protein_coding	14	7.2224	1.4806	7.3785	4.1712	0.00073716	0.0078129	-0.60608
signal sequence receptor subunit 3 [Source:HGNC Symbol;Acc:HGNC:11325]	ENSG00000114850	6747	HGNC Symbol	SSR3	protein_coding	9	7.1147	1.4198	7.2552	4.1694	0.00073992	0.0078213	-0.60976
WD repeat domain 37 [Source:HGNC Symbol;Acc:HGNC:31406]	ENSG00000047056	22884	HGNC Symbol	WDR37	protein_coding	7	4.3086	-1.7124	4.0735	-4.1694	0.00073988	0.0078213	-0.60971
megalencephalic leukoencephalopathy with subcortical cysts 1 [Source:HGNC Symbol;Acc:HGNC:17082]	ENSG00000100427	23209	HGNC Symbol	MLC1	protein_coding	5	2.6781	-3.9934	1.9346	-4.1699	0.0007391	0.0078213	-0.60867
tankyrase 2 [Source:HGNC Symbol;Acc:HGNC:15677]	ENSG00000107854	80351	HGNC Symbol	TNKS2	protein_coding	1	5.3752	-1.6521	5.2003	-4.168	0.00074201	0.0078297	-0.61254
interferon induced protein with tetratricopeptide repeats 1 [Source:HGNC Symbol;Acc:HGNC:5407]	ENSG00000185745	3434	HGNC Symbol	IFIT1	protein_coding	2	1.5045	-3.1523	0.93166	-4.168	0.00074197	0.0078297	-0.61249
Cas scaffold protein family member 4 [Source:HGNC Symbol;Acc:HGNC:15878]	ENSG00000087589	57091	HGNC Symbol	CASS4	protein_coding	3	3.1638	-2.2033	2.7603	-4.1672	0.00074323	0.0078356	-0.61415
Rho related BTB domain containing 3 [Source:HGNC Symbol;Acc:HGNC:18757]	ENSG00000164292	22836	HGNC Symbol	RHOBTB3	protein_coding	16	4.0215	-1.6677	3.703	-4.1666	0.00074422	0.0078392	-0.61547
coiled-coil domain containing 32 [Source:HGNC Symbol;Acc:HGNC:28295]	ENSG00000128891	90416	HGNC Symbol	CCDC32	protein_coding	15	6.7839	0.67595	6.6291	4.166	0.00074513	0.0078419	-0.61667
intracisternal A particle-promoted polypeptide [Source:HGNC Symbol;Acc:HGNC:6108]	ENSG00000197429	3652	HGNC Symbol	IPP	protein_coding	4	4.6042	-1.0648	4.5522	-4.1651	0.00074648	0.0078492	-0.61845
RNA polymerase III subunit C [Source:HGNC Symbol;Acc:HGNC:30076]	ENSG00000186141	10623	HGNC Symbol	POLR3C	protein_coding	6	5.9792	0.7641	5.8833	4.1641	0.00074802	0.0078585	-0.62048
siah E3 ubiquitin protein ligase 1 [Source:HGNC Symbol;Acc:HGNC:10857]	ENSG00000196470	6477	HGNC Symbol	SIAH1	protein_coding	8	2.3066	-1.3797	2.0076	-4.1636	0.00074885	0.0078604	-0.62158
tubulin alpha 1b [Source:HGNC Symbol;Acc:HGNC:18809]	ENSG00000123416	10376	HGNC Symbol	TUBA1B	protein_coding	8	11.065	2.7247	10.989	4.163	0.00074973	0.0078626	-0.62272
family with sequence similarity 89 member A [Source:HGNC Symbol;Acc:HGNC:25057]	ENSG00000182118	375061	HGNC Symbol	FAM89A	protein_coding	3	2.4234	1.5614	2.0464	4.1606	0.00075349	0.0078952	-0.62766
Kruppel like factor 11 [Source:HGNC Symbol;Acc:HGNC:11811]	ENSG00000172059	8462	HGNC Symbol	KLF11	protein_coding	6	3.4616	-1.5178	3.3709	-4.1582	0.00075739	0.0079291	-0.63274
DDB1 and CUL4 associated factor 13 [Source:HGNC Symbol;Acc:HGNC:24535]	ENSG00000164934	25879	HGNC Symbol	DCAF13	protein_coding	10	7.3238	1.5188	7.3309	4.1542	0.00076361	0.0079872	-0.64079
myotubularin related protein 14 [Source:HGNC Symbol;Acc:HGNC:26190]	ENSG00000163719	64419	HGNC Symbol	MTMR14	protein_coding	13	5.0969	-1.6959	4.7352	-4.1535	0.00076483	0.007993	-0.64236
D-tyrosyl-tRNA deacylase 2 (putative) [Source:HGNC Symbol;Acc:HGNC:20277]	ENSG00000129480	112487	HGNC Symbol	DTD2	protein_coding	3	2.5708	1.3007	2.4115	4.1519	0.00076738	0.0080102	-0.64564
RAD51 paralog C [Source:HGNC Symbol;Acc:HGNC:9820]	ENSG00000108384	5889	HGNC Symbol	RAD51C	protein_coding	18	6.1989	1.0147	6.0114	4.1514	0.00076805	0.0080102	-0.64649
TATA-box binding protein associated factor 1 [Source:HGNC Symbol;Acc:HGNC:11535]	ENSG00000147133	6872	HGNC Symbol	TAF1	protein_coding	20	4.8084	-1.247	4.7163	-4.1512	0.00076848	0.0080102	-0.64705
SRSF protein kinase 2 [Source:HGNC Symbol;Acc:HGNC:11306]	ENSG00000135250	6733	HGNC Symbol	SRPK2	protein_coding	15	6.31	-1.2734	6.1723	-4.1489	0.00077208	0.0080407	-0.65165
brain expressed X-linked 4 [Source:HGNC Symbol;Acc:HGNC:25475]	ENSG00000102409	56271	HGNC Symbol	BEX4	protein_coding	2	4.6578	-1.7499	4.4861	-4.1467	0.00077573	0.0080718	-0.6563
ADP ribosylation factor interacting protein 1 [Source:HGNC Symbol;Acc:HGNC:21496]	ENSG00000164144	27236	HGNC Symbol	ARFIP1	protein_coding	11	5.1554	1.374	4.9102	4.1444	0.00077934	0.0081023	-0.66086
eukaryotic translation initiation factor 6 [Source:HGNC Symbol;Acc:HGNC:6159]	ENSG00000242372	3692	HGNC Symbol	EIF6	protein_coding	8	8.5733	1.238	8.7667	4.1429	0.00078188	0.0081216	-0.66406
phospholipid scramblase 1 [Source:HGNC Symbol;Acc:HGNC:9092]	ENSG00000188313	5359	HGNC Symbol	PLSCR1	protein_coding	19	6.6301	1.7899	6.9022	4.1423	0.00078285	0.0081247	-0.66529
HIG1 hypoxia inducible domain family member 1A [Source:HGNC Symbol;Acc:HGNC:29527]	ENSG00000181061	25994	HGNC Symbol	HIGD1A	protein_coding	5	7.8451	0.91937	7.9566	4.1415	0.00078412	0.0081309	-0.66689
cyclin G1 [Source:HGNC Symbol;Acc:HGNC:1592]	ENSG00000113328	900	HGNC Symbol	CCNG1	protein_coding	13	6.8825	-1.4369	6.5941	-4.137	0.00079154	0.0082007	-0.67615
THAP domain containing 5 [Source:HGNC Symbol;Acc:HGNC:23188]	ENSG00000177683	168451	HGNC Symbol	THAP5	protein_coding	8	4.8673	1.2467	4.4004	4.135	0.00079484	0.0082278	-0.68025
adenylate kinase 2 [Source:HGNC Symbol;Acc:HGNC:362]	ENSG00000004455	204	HGNC Symbol	AK2	protein_coding	15	6.4078	2.1268	6.7643	4.1321	0.00079964	0.0082567	-0.68617
nuclear factor kappa B subunit 2 [Source:HGNC Symbol;Acc:HGNC:7795]	ENSG00000077150	4791	HGNC Symbol	NFKB2	protein_coding	10	3.5079	1.4369	3.4851	4.1316	0.00080039	0.0082567	-0.6871
RGP1 homolog, RAB6A GEF complex partner 1 [Source:HGNC Symbol;Acc:HGNC:21965]	ENSG00000107185	9827	HGNC Symbol	RGP1	protein_coding	2	2.9265	1.0797	2.8464	4.1322	0.00079949	0.0082567	-0.68599
RNA binding motif protein 25 [Source:HGNC Symbol;Acc:HGNC:23244]	ENSG00000119707	58517	HGNC Symbol	RBM25	protein_coding	12	7.8523	-0.69809	8.0286	-4.1319	0.00079994	0.0082567	-0.68655
heterogeneous nuclear ribonucleoprotein U [Source:HGNC Symbol;Acc:HGNC:5048]	ENSG00000153187	3192	HGNC Symbol	HNRNPU	protein_coding	31	7.2219	-0.91147	7.5513	-4.1307	0.00080204	0.0082666	-0.68912
vesicle trafficking 1 [Source:HGNC Symbol;Acc:HGNC:20954]	ENSG00000009844	51534	HGNC Symbol	VTA1	protein_coding	5	7.1394	0.84788	7.0412	4.1296	0.00080381	0.0082777	-0.69129
small integral membrane protein 20 [Source:HGNC Symbol;Acc:HGNC:37260]	ENSG00000250317	389203	HGNC Symbol	SMIM20	protein_coding	5	3.7741	1.2952	3.6556	4.1282	0.00080611	0.00828	-0.6941
proteasome 26S subunit, non-ATPase 1 [Source:HGNC Symbol;Acc:HGNC:9554]	ENSG00000173692	5707	HGNC Symbol	PSMD1	protein_coding	13	6.5122	1.2639	6.7483	4.1288	0.00080516	0.00828	-0.69295
protein kinase C eta [Source:HGNC Symbol;Acc:HGNC:9403]	ENSG00000027075	5583	HGNC Symbol	PRKCH	protein_coding	28	7.3521	-0.92047	7.4366	-4.1285	0.00080563	0.00828	-0.69352
heterogeneous nuclear ribonucleoprotein U like 1 [Source:HGNC Symbol;Acc:HGNC:17011]	ENSG00000105323	11100	HGNC Symbol	HNRNPUL1	protein_coding	22	5.1885	-1.2162	4.9166	-4.1276	0.00080712	0.0082834	-0.69534
Epstein-Barr virus induced 3 [Source:HGNC Symbol;Acc:HGNC:3129]	ENSG00000105246	10148	HGNC Symbol	EBI3	protein_coding	2	3.1034	5.0026	3.8645	4.1266	0.00080877	0.0082931	-0.69735
microfibril associated protein 3 [Source:HGNC Symbol;Acc:HGNC:7034]	ENSG00000037749	4238	HGNC Symbol	MFAP3	protein_coding	12	3.789	0.91157	3.3446	4.1253	0.00081098	0.0082946	-0.70004
solute carrier family 25 member 13 [Source:HGNC Symbol;Acc:HGNC:10983]	ENSG00000004864	10165	HGNC Symbol	SLC25A13	protein_coding	8	3.4607	-1.2217	3.0255	-4.1254	0.00081089	0.0082946	-0.69993
activating transcription factor 7 interacting protein [Source:HGNC Symbol;Acc:HGNC:20092]	ENSG00000171681	55729	HGNC Symbol	ATF7IP	protein_coding	24	5.538	-1.9315	5.2373	-4.1253	0.00081095	0.0082946	-0.7
IMP3, U3 small nucleolar ribonucleoprotein [Source:HGNC Symbol;Acc:HGNC:14497]	ENSG00000177971	55272	HGNC Symbol	IMP3	protein_coding	3	4.3666	1.2314	4.3766	4.1247	0.0008121	0.0082989	-0.70139
chaperonin containing TCP1 subunit 2 [Source:HGNC Symbol;Acc:HGNC:1615]	ENSG00000166226	10576	HGNC Symbol	CCT2	protein_coding	14	8.1358	1.5785	8.1867	4.1234	0.00081426	0.0083068	-0.70401
TNF receptor associated factor 3 [Source:HGNC Symbol;Acc:HGNC:12033]	ENSG00000131323	7187	HGNC Symbol	TRAF3	protein_coding	9	3.4835	1.3631	3.439	4.1238	0.00081358	0.0083068	-0.70318
UTP14A, small subunit processome component [Source:HGNC Symbol;Acc:HGNC:10665]	ENSG00000156697	10813	HGNC Symbol	UTP14A	protein_coding	4	5.2451	1.1859	5.2943	4.1223	0.00081603	0.0083178	-0.70615
zinc finger protein 655 [Source:HGNC Symbol;Acc:HGNC:30899]	ENSG00000197343	79027	HGNC Symbol	ZNF655	protein_coding	25	5.8873	-1.0565	5.8961	-4.1206	0.00081893	0.0083403	-0.70964
carnosine synthase 1 [Source:HGNC Symbol;Acc:HGNC:29268]	ENSG00000172508	57571	HGNC Symbol	CARNS1	protein_coding	7	2.2302	-1.8279	1.8622	-4.12	0.00081999	0.008344	-0.71091
G-patch domain containing 4 [Source:HGNC Symbol;Acc:HGNC:25982]	ENSG00000160818	54865	HGNC Symbol	GPATCH4	protein_coding	16	6.3226	1.9941	6.711	4.1147	0.00082908	0.0084222	-0.72176
synaptotagmin binding cytoplasmic RNA interacting protein [Source:HGNC Symbol;Acc:HGNC:16918]	ENSG00000135316	10492	HGNC Symbol	SYNCRIP	protein_coding	4	7.0935	1.2444	7.2736	4.1151	0.00082843	0.0084222	-0.72099
CD3e molecule associated protein [Source:HGNC Symbol;Acc:HGNC:24219]	ENSG00000117877	10849	HGNC Symbol	CD3EAP	protein_coding	4	2.8138	2.0555	2.5467	4.1127	0.00083257	0.0084505	-0.72589
CDKN2A interacting protein [Source:HGNC Symbol;Acc:HGNC:24325]	ENSG00000168564	55602	HGNC Symbol	CDKN2AIP	protein_coding	5	3.7982	-1.1962	3.3505	-4.1101	0.00083711	0.0084822	-0.73125
serine protease 23 [Source:HGNC Symbol;Acc:HGNC:14370]	ENSG00000150687	11098	HGNC Symbol	PRSS23	protein_coding	9	3.3303	-3.9296	2.9584	-4.1102	0.00083689	0.0084822	-0.73099
apolipoprotein L1 [Source:HGNC Symbol;Acc:HGNC:618]	ENSG00000100342	8542	HGNC Symbol	APOL1	protein_coding	12	6.621	1.2183	6.7763	4.1078	0.0008411	0.0085154	-0.73592
squalene epoxidase [Source:HGNC Symbol;Acc:HGNC:11279]	ENSG00000104549	6713	HGNC Symbol	SQLE	protein_coding	6	4.4206	2.0215	4.5868	4.1072	0.00084228	0.0085202	-0.7373
ASH1 like histone lysine methyltransferase [Source:HGNC Symbol;Acc:HGNC:19088]	ENSG00000116539	55870	HGNC Symbol	ASH1L	protein_coding	7	6.0896	-1.2899	6.0783	-4.1033	0.00084906	0.0085815	-0.74519
zinc finger ZZ-type and EF-hand domain containing 1 [Source:HGNC Symbol;Acc:HGNC:29027]	ENSG00000074755	23140	HGNC Symbol	ZZEF1	protein_coding	11	4.5167	-1.3886	4.0528	-4.1014	0.00085243	0.0086083	-0.74909
BCR, RhoGEF and GTPase activating protein [Source:HGNC Symbol;Acc:HGNC:1014]	ENSG00000186716	613	HGNC Symbol	BCR	protein_coding	15	4.0376	-1.399	3.8894	-4.0997	0.00085544	0.0086315	-0.75256
H2A histone family member J [Source:HGNC Symbol;Acc:HGNC:14456]	ENSG00000246705	55766	HGNC Symbol	H2AFJ	protein_coding	3	3.099	-1.525	3.0275	-4.0991	0.00085649	0.0086348	-0.75376
WD repeat domain 4 [Source:HGNC Symbol;Acc:HGNC:12756]	ENSG00000160193	10785	HGNC Symbol	WDR4	protein_coding	7	3.1958	1.4233	3.0609	4.0975	0.00085939	0.0086468	-0.75709
RAB30, member RAS oncogene family [Source:HGNC Symbol;Acc:HGNC:9770]	ENSG00000137502	27314	HGNC Symbol	RAB30	protein_coding	16	3.9687	-1.7609	3.3994	-4.0973	0.00085984	0.0086468	-0.75761
tetraspanin 32 [Source:HGNC Symbol;Acc:HGNC:13410]	ENSG00000064201	10077	HGNC Symbol	TSPAN32	protein_coding	17	2.2241	-4.6283	1.178	-4.0974	0.00085967	0.0086468	-0.75741
ariadne RBR E3 ubiquitin protein ligase 2 opposite strand [Source:HGNC Symbol;Acc:HGNC:34425]	ENSG00000221883	646450	HGNC Symbol	ARIH2OS	protein_coding	2	2.041	-1.9362	2.0374	-4.0962	0.00086174	0.0086585	-0.75977
stromal cell derived factor 2 [Source:HGNC Symbol;Acc:HGNC:10675]	ENSG00000132581	6388	HGNC Symbol	SDF2	protein_coding	10	7.165	0.83512	7.13	4.0949	0.00086404	0.0086744	-0.76239
DEAD-box helicase 18 [Source:HGNC Symbol;Acc:HGNC:2741]	ENSG00000088205	8886	HGNC Symbol	DDX18	protein_coding	6	7.2915	0.92891	7.4254	4.0942	0.00086542	0.0086766	-0.76396
heat shock transcription factor 2 [Source:HGNC Symbol;Acc:HGNC:5225]	ENSG00000025156	3298	HGNC Symbol	HSF2	protein_coding	3	5.2992	-1.0448	5.0366	-4.0936	0.00086643	0.0086766	-0.76511
MIAT neighbor [Source:HGNC Symbol;Acc:HGNC:50731]	ENSG00000244625	NA	HGNC Symbol	MIATNB	lincRNA	10	3.3078	-1.8827	2.7908	-4.0939	0.00086595	0.0086766	-0.76457
syntaxin 8 [Source:HGNC Symbol;Acc:HGNC:11443]	ENSG00000170310	9482	HGNC Symbol	STX8	protein_coding	12	7.1834	-1.3257	7.1495	-4.0921	0.0008691	0.0086961	-0.76814
coiled-coil domain containing 7 [Source:HGNC Symbol;Acc:HGNC:26533]	ENSG00000216937	79741	HGNC Symbol	CCDC7	protein_coding	16	3.0988	-1.4271	2.9263	-4.0916	0.00086997	0.0086975	-0.76912
Yip1 domain family member 6 [Source:HGNC Symbol;Acc:HGNC:28304]	ENSG00000181704	286451	HGNC Symbol	YIPF6	protein_coding	7	5.4961	0.87097	5.5888	4.0902	0.00087267	0.0087067	-0.77217
AT-rich interaction domain 4A [Source:HGNC Symbol;Acc:HGNC:9885]	ENSG00000032219	5926	HGNC Symbol	ARID4A	protein_coding	11	5.566	-2.1566	5.2432	-4.0899	0.00087307	0.0087067	-0.77262
prostaglandin D2 synthase [Source:HGNC Symbol;Acc:HGNC:9592]	ENSG00000107317	5730	HGNC Symbol	PTGDS	protein_coding	10	3.6496	-3.4971	3.4481	-4.0906	0.00087184	0.0087067	-0.77123
RAN, member RAS oncogene family [Source:HGNC Symbol;Acc:HGNC:9846]	ENSG00000132341	5901	HGNC Symbol	RAN	protein_coding	12	9.1776	1.722	9.2484	4.0888	0.0008751	0.0087125	-0.77491
transcription elongation factor, mitochondrial [Source:HGNC Symbol;Acc:HGNC:26223]	ENSG00000172171	79736	HGNC Symbol	TEFM	protein_coding	5	5.1837	0.98364	4.7866	4.0891	0.0008746	0.0087125	-0.77435
Rho guanine nucleotide exchange factor 7 [Source:HGNC Symbol;Acc:HGNC:15607]	ENSG00000102606	8874	HGNC Symbol	ARHGEF7	protein_coding	20	4.3817	-1.1387	4.3677	-4.0862	0.00087984	0.0087524	-0.78022
hepatitis A virus cellular receptor 1 [Source:HGNC Symbol;Acc:HGNC:17866]	ENSG00000113249	26762	HGNC Symbol	HAVCR1	protein_coding	6	4.475	1.6319	4.5214	4.0824	0.0008869	0.0088053	-0.78808
proliferation-associated 2G4 [Source:HGNC Symbol;Acc:HGNC:8550]	ENSG00000170515	5036	HGNC Symbol	PA2G4	protein_coding	7	7.0236	1.1685	7.3203	4.0818	0.00088809	0.0088053	-0.7894
solute carrier family 7 member 6 opposite strand [Source:HGNC Symbol;Acc:HGNC:25807]	ENSG00000103061	84138	HGNC Symbol	SLC7A6OS	protein_coding	5	2.5054	-1.0604	2.2081	-4.0826	0.0008866	0.0088053	-0.78774
Rho GTPase activating protein 12 [Source:HGNC Symbol;Acc:HGNC:16348]	ENSG00000165322	94134	HGNC Symbol	ARHGAP12	protein_coding	10	2.5992	-3.2558	1.9392	-4.082	0.00088767	0.0088053	-0.78893
DNA polymerase delta 3, accessory subunit [Source:HGNC Symbol;Acc:HGNC:20932]	ENSG00000077514	10714	HGNC Symbol	POLD3	protein_coding	10	5.2709	0.91709	5.0589	4.0807	0.00088996	0.0088165	-0.79147
SP140 nuclear body protein like [Source:HGNC Symbol;Acc:HGNC:25105]	ENSG00000185404	93349	HGNC Symbol	SP140L	protein_coding	10	5.2041	-1.124	5.0945	-4.0789	0.00089341	0.0088215	-0.79527
G protein nucleolar 1 (putative) [Source:HGNC Symbol;Acc:HGNC:4413]	ENSG00000204590	2794	HGNC Symbol	GNL1	protein_coding	5	2.6814	-1.2637	2.6439	-4.0794	0.00089252	0.0088215	-0.7943
coiled-coil domain containing 14 [Source:HGNC Symbol;Acc:HGNC:25766]	ENSG00000175455	64770	HGNC Symbol	CCDC14	protein_coding	22	4.646	-1.6423	4.4612	-4.0793	0.00089268	0.0088215	-0.79448
palladin, cytoskeletal associated protein [Source:HGNC Symbol;Acc:HGNC:17068]	ENSG00000129116	23022	HGNC Symbol	PALLD	protein_coding	18	2.941	-1.8532	2.795	-4.0789	0.00089341	0.0088215	-0.79527
ribosomal protein L7 like 1 [Source:HGNC Symbol;Acc:HGNC:21370]	ENSG00000146223	285855	HGNC Symbol	RPL7L1	protein_coding	10	7.7295	1.1014	7.7824	4.078	0.00089498	0.0088227	-0.797
SH3 domain binding protein 5 [Source:HGNC Symbol;Acc:HGNC:10827]	ENSG00000131370	9467	HGNC Symbol	SH3BP5	protein_coding	9	6.1024	0.93293	6.4087	4.078	0.000895	0.0088227	-0.79703
actin gamma 1 [Source:HGNC Symbol;Acc:HGNC:144]	ENSG00000184009	71	HGNC Symbol	ACTG1	protein_coding	17	10.134	1.383	10.82	4.0774	0.00089615	0.0088267	-0.79828
nuclear receptor 2C2 associated protein [Source:HGNC Symbol;Acc:HGNC:30763]	ENSG00000184162	126382	HGNC Symbol	NR2C2AP	protein_coding	7	5.1828	1.361	5.3827	4.0762	0.00089852	0.0088287	-0.80089
peroxisomal biogenesis factor 11 beta [Source:HGNC Symbol;Acc:HGNC:8853]	ENSG00000131779	8799	HGNC Symbol	PEX11B	protein_coding	3	6.4293	1.0893	6.1014	4.0761	0.00089856	0.0088287	-0.80093
PDZ domain containing 8 [Source:HGNC Symbol;Acc:HGNC:26974]	ENSG00000165650	118987	HGNC Symbol	PDZD8	protein_coding	4	4.2173	-1.3015	4.0256	-4.0766	0.00089769	0.0088287	-0.79998
chromosome 5 open reading frame 51 [Source:HGNC Symbol;Acc:HGNC:27750]	ENSG00000205765	285636	HGNC Symbol	C5orf51	protein_coding	4	3.519	1.2193	3.2089	4.0752	0.00090034	0.008839	-0.80288
solute carrier family 4 member 10 [Source:HGNC Symbol;Acc:HGNC:13811]	ENSG00000144290	57282	HGNC Symbol	SLC4A10	protein_coding	12	3.6629	2.4058	3.3512	4.0741	0.00090233	0.0088512	-0.80504
protein kinase N2 [Source:HGNC Symbol;Acc:HGNC:9406]	ENSG00000065243	5586	HGNC Symbol	PKN2	protein_coding	6	3.9566	-1.4371	3.7549	-4.0734	0.00090374	0.0088575	-0.80658
Rho GTPase activating protein 4 [Source:HGNC Symbol;Acc:HGNC:674]	ENSG00000089820	393	HGNC Symbol	ARHGAP4	protein_coding	24	2.8277	-1.8047	2.5206	-4.073	0.00090444	0.0088575	-0.80735
SIN3 transcription regulator family member A [Source:HGNC Symbol;Acc:HGNC:19353]	ENSG00000169375	25942	HGNC Symbol	SIN3A	protein_coding	15	6.0607	-1.49	6.0176	-4.0712	0.00090782	0.0088766	-0.81101
t-complex 11 like 2 [Source:HGNC Symbol;Acc:HGNC:28627]	ENSG00000166046	255394	HGNC Symbol	TCP11L2	protein_coding	10	3.4617	-3.8757	2.6595	-4.0712	0.00090788	0.0088766	-0.81108
tubulin folding cofactor A [Source:HGNC Symbol;Acc:HGNC:11579]	ENSG00000171530	6902	HGNC Symbol	TBCA	protein_coding	10	6.6238	0.99619	6.5605	4.0698	0.00091054	0.0088954	-0.81396
tripartite motif containing 23 [Source:HGNC Symbol;Acc:HGNC:660]	ENSG00000113595	373	HGNC Symbol	TRIM23	protein_coding	7	3.6342	-1.4046	3.0122	-4.0687	0.00091253	0.0089076	-0.8161
IGF like family receptor 1 [Source:HGNC Symbol;Acc:HGNC:23620]	ENSG00000126246	79713	HGNC Symbol	IGFLR1	protein_coding	11	2.3401	0.92453	2.0279	4.0678	0.00091436	0.0089181	-0.81807
patatin like phospholipase domain containing 4 [Source:HGNC Symbol;Acc:HGNC:24887]	ENSG00000006757	8228	HGNC Symbol	PNPLA4	protein_coding	4	3.6261	1.1705	3.3684	4.0666	0.00091669	0.0089336	-0.82057
tRNA methyltransferase 5 [Source:HGNC Symbol;Acc:HGNC:23141]	ENSG00000126814	57570	HGNC Symbol	TRMT5	protein_coding	3	3.5538	0.92782	3.3595	4.0644	0.00092087	0.0089671	-0.82505
mitochondrial ribosomal protein L55 [Source:HGNC Symbol;Acc:HGNC:16686]	ENSG00000162910	128308	HGNC Symbol	MRPL55	protein_coding	34	5.1484	-0.82034	5.4644	-4.0638	0.000922	0.0089708	-0.82626
MCL1, BCL2 family apoptosis regulator [Source:HGNC Symbol;Acc:HGNC:6943]	ENSG00000143384	4170	HGNC Symbol	MCL1	protein_coding	4	6.9699	-1.0503	7.1721	-4.0615	0.00092635	0.009003	-0.83088
vacuolar protein sorting 13 homolog B [Source:HGNC Symbol;Acc:HGNC:2183]	ENSG00000132549	157680	HGNC Symbol	VPS13B	protein_coding	12	5.4284	-1.6127	5.2972	-4.0613	0.00092682	0.009003	-0.83138
neutral cholesterol ester hydrolase 1 [Source:HGNC Symbol;Acc:HGNC:29260]	ENSG00000144959	57552	HGNC Symbol	NCEH1	protein_coding	7	3.63	2.1343	3.434	4.058	0.00093327	0.0090298	-0.8382
eukaryotic translation initiation factor 4E binding protein 1 [Source:HGNC Symbol;Acc:HGNC:3288]	ENSG00000187840	1978	HGNC Symbol	EIF4EBP1	protein_coding	2	3.2775	1.582	3.274	4.0579	0.00093344	0.0090298	-0.83838
ATPase H+ transporting V0 subunit b [Source:HGNC Symbol;Acc:HGNC:861]	ENSG00000117410	533	HGNC Symbol	ATP6V0B	protein_coding	13	7.2016	1.1189	7.5319	4.0591	0.000931	0.0090298	-0.8358
mitochondrial ribosomal protein L28 [Source:HGNC Symbol;Acc:HGNC:14484]	ENSG00000086504	10573	HGNC Symbol	MRPL28	protein_coding	11	3.7342	0.95385	3.829	4.0572	0.00093468	0.0090298	-0.83968
protein kinase AMP-activated catalytic subunit alpha 1 [Source:HGNC Symbol;Acc:HGNC:9376]	ENSG00000132356	5562	HGNC Symbol	PRKAA1	protein_coding	9	5.8683	-1.0892	5.8852	-4.0572	0.00093484	0.0090298	-0.83986
cathepsin O [Source:HGNC Symbol;Acc:HGNC:2542]	ENSG00000256043	1519	HGNC Symbol	CTSO	protein_coding	1	3.4667	-1.6912	3.3813	-4.0572	0.00093484	0.0090298	-0.83986
novel transcript	ENSG00000235192	NA	Clone-based (Ensembl) gene	AC009495.3	lincRNA	1	1.7655	-3.3469	1.1928	-4.0578	0.00093357	0.0090298	-0.83851
coiled-coil domain containing 126 [Source:HGNC Symbol;Acc:HGNC:22398]	ENSG00000169193	90693	HGNC Symbol	CCDC126	protein_coding	8	5.1163	1.3938	4.9207	4.0541	0.00094079	0.0090432	-0.84609
molybdenum cofactor synthesis 2 [Source:HGNC Symbol;Acc:HGNC:7193]	ENSG00000164172	4338	HGNC Symbol	MOCS2	protein_coding	10	5.3046	1.0075	5.1334	4.0541	0.00094087	0.0090432	-0.84618
bromodomain containing 2 [Source:HGNC Symbol;Acc:HGNC:1103]	ENSG00000204256	6046	HGNC Symbol	BRD2	protein_coding	19	6.8973	-0.81137	7.0279	-4.0546	0.00093992	0.0090432	-0.84518
F-box and WD repeat domain containing 7 [Source:HGNC Symbol;Acc:HGNC:16712]	ENSG00000109670	55294	HGNC Symbol	FBXW7	protein_coding	17	5.5173	-0.98158	5.4872	-4.0534	0.00094227	0.0090432	-0.84764
serine and arginine rich splicing factor 3 [Source:HGNC Symbol;Acc:HGNC:10785]	ENSG00000112081	6428	HGNC Symbol	SRSF3	protein_coding	8	9.8761	-0.99041	9.938	-4.055	0.00093912	0.0090432	-0.84434
protein phosphatase, Mg2+/Mn2+ dependent 1B [Source:HGNC Symbol;Acc:HGNC:9276]	ENSG00000138032	5495	HGNC Symbol	PPM1B	protein_coding	11	4.8219	-1.1332	4.6818	-4.0551	0.00093896	0.0090432	-0.84417
ring finger protein 113A [Source:HGNC Symbol;Acc:HGNC:12974]	ENSG00000125352	7737	HGNC Symbol	RNF113A	protein_coding	1	5.7778	-1.1796	5.6378	-4.0536	0.00094175	0.0090432	-0.8471
natural killer cell triggering receptor [Source:HGNC Symbol;Acc:HGNC:7833]	ENSG00000114857	4820	HGNC Symbol	NKTR	protein_coding	19	6.6355	-1.4504	6.6107	-4.0534	0.00094219	0.0090432	-0.84755
DPH2 homolog [Source:HGNC Symbol;Acc:HGNC:3004]	ENSG00000132768	1802	HGNC Symbol	DPH2	protein_coding	17	4.6573	1.7788	5.1924	4.0529	0.00094323	0.0090452	-0.84864
mitochondrial ribosomal protein L24 [Source:HGNC Symbol;Acc:HGNC:14037]	ENSG00000143314	79590	HGNC Symbol	MRPL24	protein_coding	6	6.9218	1.6351	7.245	4.0477	0.00095351	0.0091074	-0.85929
SMG7, nonsense mediated mRNA decay factor [Source:HGNC Symbol;Acc:HGNC:16792]	ENSG00000116698	9887	HGNC Symbol	SMG7	protein_coding	16	5.1701	-0.80614	5.3269	-4.0488	0.00095139	0.0091074	-0.85711
cytoplasmic FMR1 interacting protein 2 [Source:HGNC Symbol;Acc:HGNC:13760]	ENSG00000055163	26999	HGNC Symbol	CYFIP2	protein_coding	24	8.0533	-1.5464	8.0257	-4.0478	0.00095325	0.0091074	-0.85902
proprotein convertase subtilisin/kexin type 7 [Source:HGNC Symbol;Acc:HGNC:8748]	ENSG00000160613	9159	HGNC Symbol	PCSK7	protein_coding	15	6.9639	-1.6816	6.7226	-4.0479	0.00095316	0.0091074	-0.85893
diacylglycerol kinase theta [Source:HGNC Symbol;Acc:HGNC:2856]	ENSG00000145214	1609	HGNC Symbol	DGKQ	protein_coding	5	2.4523	-1.9544	2.4146	-4.048	0.00095286	0.0091074	-0.85862
torsin family 4 member A [Source:HGNC Symbol;Acc:HGNC:25981]	ENSG00000198113	54863	HGNC Symbol	TOR4A	protein_coding	1	2.7969	1.3557	2.4329	4.0472	0.00095441	0.0091087	-0.86022
MIR155 host gene [Source:HGNC Symbol;Acc:HGNC:35460]	ENSG00000234883	NA	HGNC Symbol	MIR155HG	lincRNA	1	3.6749	6.411	4.9408	4.042	0.00096489	0.0092013	-0.87095
zinc finger protein 287 [Source:HGNC Symbol;Acc:HGNC:13502]	ENSG00000141040	57336	HGNC Symbol	ZNF287	protein_coding	6	1.4773	1.3823	1.2533	4.039	0.00097107	0.009253	-0.87723
syntaxin 16 [Source:HGNC Symbol;Acc:HGNC:11431]	ENSG00000124222	8675	HGNC Symbol	STX16	protein_coding	20	4.7661	-1.1881	4.7593	-4.0379	0.00097318	0.0092657	-0.87937
5'-nucleotidase domain containing 2 [Source:HGNC Symbol;Acc:HGNC:25717]	ENSG00000168268	64943	HGNC Symbol	NT5DC2	protein_coding	15	2.0862	3.135	2.2323	4.0367	0.00097557	0.0092737	-0.88177
EYA transcriptional coactivator and phosphatase 3 [Source:HGNC Symbol;Acc:HGNC:3521]	ENSG00000158161	2140	HGNC Symbol	EYA3	protein_coding	8	5.9814	1.2335	6.0152	4.0369	0.00097517	0.0092737	-0.88138
four and a half LIM domains 1 [Source:HGNC Symbol;Acc:HGNC:3702]	ENSG00000022267	2273	HGNC Symbol	FHL1	protein_coding	38	2.2542	-2.4218	1.4207	-4.0346	0.00098003	0.0093088	-0.88627
EF-hand domain family member D2 [Source:HGNC Symbol;Acc:HGNC:28670]	ENSG00000142634	79180	HGNC Symbol	EFHD2	protein_coding	2	5.108	-2.1164	5.1714	-4.0335	0.00098218	0.0093218	-0.88841
transmembrane protein 99 [Source:HGNC Symbol;Acc:HGNC:28305]	ENSG00000167920	147184	HGNC Symbol	TMEM99	protein_coding	4	3.5188	1.5834	3.0611	4.0329	0.00098349	0.0093268	-0.88972
LEM domain containing 3 [Source:HGNC Symbol;Acc:HGNC:28887]	ENSG00000174106	23592	HGNC Symbol	LEMD3	protein_coding	6	4.3041	-1.0914	4.2164	-4.0308	0.00098773	0.0093596	-0.89395
WD repeat and FYVE domain containing 1 [Source:HGNC Symbol;Acc:HGNC:20451]	ENSG00000085449	57590	HGNC Symbol	WDFY1	protein_coding	6	4.6834	-1.9823	4.322	-4.0293	0.00099094	0.0093826	-0.89714
TraB domain containing 2A [Source:HGNC Symbol;Acc:HGNC:27013]	ENSG00000186854	129293	HGNC Symbol	TRABD2A	protein_coding	10	3.4751	2.2493	3.2109	4.026	0.00099775	0.0094248	-0.90387
ubiquitin like modifier activating enzyme 3 [Source:HGNC Symbol;Acc:HGNC:12470]	ENSG00000144744	9039	HGNC Symbol	UBA3	protein_coding	13	7.906	0.86367	7.6949	4.0264	0.00099677	0.0094248	-0.9029
arginine and serine rich coiled-coil 2 [Source:HGNC Symbol;Acc:HGNC:30559]	ENSG00000111011	65117	HGNC Symbol	RSRC2	protein_coding	20	7.5898	-0.70635	7.6595	-4.0262	0.00099731	0.0094248	-0.90344
arginase 2 [Source:HGNC Symbol;Acc:HGNC:664]	ENSG00000081181	384	HGNC Symbol	ARG2	protein_coding	4	2.4549	1.1239	2.0365	4.0239	0.0010021	0.0094586	-0.90817
zinc finger protein 791 [Source:HGNC Symbol;Acc:HGNC:26895]	ENSG00000173875	163049	HGNC Symbol	ZNF791	protein_coding	6	6.2203	-1.162	6.0514	-4.0219	0.0010063	0.009491	-0.9123
N-terminal Xaa-Pro-Lys N-methyltransferase 1 [Source:HGNC Symbol;Acc:HGNC:23373]	ENSG00000148335	28989	HGNC Symbol	NTMT1	protein_coding	11	4.084	0.74189	3.9456	4.0205	0.0010092	0.0095103	-0.91508
chromosome 15 open reading frame 48 [Source:HGNC Symbol;Acc:HGNC:29898]	ENSG00000166920	84419	HGNC Symbol	C15orf48	protein_coding	4	1.6166	3.9154	1.9943	4.0187	0.0010131	0.0095329	-0.9189
X-ray repair cross complementing 4 [Source:HGNC Symbol;Acc:HGNC:12831]	ENSG00000152422	7518	HGNC Symbol	XRCC4	protein_coding	6	5.0656	0.92462	4.6999	4.0186	0.0010132	0.0095329	-0.91895
RB binding protein 8, endonuclease [Source:HGNC Symbol;Acc:HGNC:9891]	ENSG00000101773	5932	HGNC Symbol	RBBP8	protein_coding	16	4.9136	1.4513	4.4219	4.0182	0.0010142	0.0095347	-0.9199
transforming growth factor beta regulator 1 [Source:HGNC Symbol;Acc:HGNC:29551]	ENSG00000154144	84897	HGNC Symbol	TBRG1	protein_coding	10	5.4491	-0.88655	5.7257	-4.016	0.0010188	0.0095571	-0.92437
dystonin [Source:HGNC Symbol;Acc:HGNC:1090]	ENSG00000151914	667	HGNC Symbol	DST	protein_coding	40	4.0055	-1.8206	3.2486	-4.0162	0.0010183	0.0095571	-0.92389
SNF related kinase [Source:HGNC Symbol;Acc:HGNC:30598]	ENSG00000163788	54861	HGNC Symbol	SNRK	protein_coding	8	5.2494	-1.8495	5.019	-4.0159	0.0010189	0.0095571	-0.92452
AF4/FMR2 family member 4 [Source:HGNC Symbol;Acc:HGNC:17869]	ENSG00000072364	27125	HGNC Symbol	AFF4	protein_coding	9	4.8529	-1.3579	4.6241	-4.0155	0.0010199	0.0095589	-0.92547
zinc finger protein 486 [Source:HGNC Symbol;Acc:HGNC:20807]	ENSG00000256229	90649	HGNC Symbol	ZNF486	protein_coding	2	2.2247	1.2057	1.8477	4.0141	0.0010229	0.0095793	-0.92834
guanylate binding protein 4 [Source:HGNC Symbol;Acc:HGNC:20480]	ENSG00000162654	115361	HGNC Symbol	GBP4	protein_coding	3	7.7971	1.277	7.9434	4.01	0.0010316	0.0096528	-0.93661
DNA primase subunit 1 [Source:HGNC Symbol;Acc:HGNC:9369]	ENSG00000198056	5557	HGNC Symbol	PRIM1	protein_coding	8	5.504	1.3164	5.3376	4.0092	0.0010333	0.0096596	-0.9383
zinc finger protein 236 [Source:HGNC Symbol;Acc:HGNC:13028]	ENSG00000130856	7776	HGNC Symbol	ZNF236	protein_coding	8	3.7177	-1.5172	3.2612	-4.0089	0.0010339	0.0096596	-0.93883
lipin 1 [Source:HGNC Symbol;Acc:HGNC:13345]	ENSG00000134324	23175	HGNC Symbol	LPIN1	protein_coding	19	6.1279	-1.1315	6.0509	-4.0069	0.0010383	0.0096934	-0.94304
TNF superfamily member 4 [Source:HGNC Symbol;Acc:HGNC:11934]	ENSG00000117586	7292	HGNC Symbol	TNFSF4	protein_coding	3	4.6177	4.1797	5.2796	4.0033	0.0010462	0.0097056	-0.95042
solute carrier family 29 member 1 (Augustine blood group) [Source:HGNC Symbol;Acc:HGNC:11003]	ENSG00000112759	2030	HGNC Symbol	SLC29A1	protein_coding	25	3.5303	2.7754	3.6188	4.0033	0.0010461	0.0097056	-0.95035
exoribonuclease 1 [Source:HGNC Symbol;Acc:HGNC:23994]	ENSG00000104626	90459	HGNC Symbol	ERI1	protein_coding	9	4.6315	1.4032	4.5877	4.0049	0.0010426	0.0097056	-0.94707
heterogeneous nuclear ribonucleoprotein A1-like 2 [Source:HGNC Symbol;Acc:HGNC:27067]	ENSG00000139675	144983	HGNC Symbol	HNRNPA1L2	protein_coding	1	4.9565	-0.98416	4.9035	-4.0039	0.0010449	0.0097056	-0.94927
ribosomal protein L3 [Source:HGNC Symbol;Acc:HGNC:10332]	ENSG00000100316	6122	HGNC Symbol	RPL3	protein_coding	18	11.967	-1.0502	11.846	-4.003	0.0010469	0.0097056	-0.95113
engulfment and cell motility 1 [Source:HGNC Symbol;Acc:HGNC:16286]	ENSG00000155849	9844	HGNC Symbol	ELMO1	protein_coding	19	5.7559	-1.1926	5.485	-4.0051	0.0010422	0.0097056	-0.94666
islet cell autoantigen 1 like [Source:HGNC Symbol;Acc:HGNC:14442]	ENSG00000163596	130026	HGNC Symbol	ICA1L	protein_coding	22	3.5848	-1.4369	3.0824	-4.0045	0.0010435	0.0097056	-0.94797
N(alpha)-acetyltransferase 16, NatA auxiliary subunit [Source:HGNC Symbol;Acc:HGNC:26164]	ENSG00000172766	79612	HGNC Symbol	NAA16	protein_coding	11	3.7607	-1.8293	3.3736	-4.0032	0.0010463	0.0097056	-0.95056
long intergenic non-protein coding RNA 653 [Source:HGNC Symbol;Acc:HGNC:44308]	ENSG00000273148	NA	HGNC Symbol	LINC00653	lincRNA	1	3.6899	-2.4398	3.8368	-4.0044	0.0010438	0.0097056	-0.94822
eukaryotic translation initiation factor 4A2 [Source:HGNC Symbol;Acc:HGNC:3284]	ENSG00000156976	1974	HGNC Symbol	EIF4A2	protein_coding	27	8.9444	-0.91757	9.072	-4.0019	0.0010492	0.0097191	-0.95326
multiple coagulation factor deficiency 2 [Source:HGNC Symbol;Acc:HGNC:18451]	ENSG00000180398	90411	HGNC Symbol	MCFD2	protein_coding	18	5.6582	0.84922	5.6513	4.0006	0.0010521	0.0097237	-0.956
glutamine rich 1 [Source:HGNC Symbol;Acc:HGNC:24713]	ENSG00000198218	54870	HGNC Symbol	QRICH1	protein_coding	13	5.8824	-0.95407	5.7148	-4.0007	0.0010519	0.0097237	-0.95584
cyclin B3 [Source:HGNC Symbol;Acc:HGNC:18709]	ENSG00000147082	85417	HGNC Symbol	CCNB3	protein_coding	8	1.8118	-1.2362	1.3045	-4.0013	0.0010506	0.0097237	-0.95463
inositol monophosphatase 1 [Source:HGNC Symbol;Acc:HGNC:6050]	ENSG00000133731	3612	HGNC Symbol	IMPA1	protein_coding	13	6.198	1.1354	6.1108	3.9998	0.0010539	0.0097329	-0.95768
RNA binding motif protein 4B [Source:HGNC Symbol;Acc:HGNC:28842]	ENSG00000173914	83759	HGNC Symbol	RBM4B	protein_coding	8	5.3979	0.953	5.0493	3.9985	0.0010567	0.009751	-0.96026
integrin subunit beta 2 [Source:HGNC Symbol;Acc:HGNC:6155]	ENSG00000160255	3689	HGNC Symbol	ITGB2	protein_coding	25	7.2981	-1.4247	7.4461	-3.9971	0.0010597	0.0097716	-0.9631
iduronate 2-sulfatase [Source:HGNC Symbol;Acc:HGNC:5389]	ENSG00000010404	3423	HGNC Symbol	IDS	protein_coding	8	5.5429	-2.0089	5.5899	-3.9966	0.0010609	0.0097748	-0.96417
chromosome X open reading frame 21 [Source:HGNC Symbol;Acc:HGNC:25667]	ENSG00000120280	80231	HGNC Symbol	CXorf21	protein_coding	1	3.9816	1.5298	3.6894	3.9951	0.0010642	0.0097829	-0.96725
T cell activation inhibitor, mitochondrial [Source:HGNC Symbol;Acc:HGNC:25241]	ENSG00000179152	285343	HGNC Symbol	TCAIM	protein_coding	12	4.7401	1.1704	4.5814	3.9951	0.0010642	0.0097829	-0.96719
solute carrier family 50 member 1 [Source:HGNC Symbol;Acc:HGNC:30657]	ENSG00000169241	55974	HGNC Symbol	SLC50A1	protein_coding	15	6.5807	0.63078	6.6188	3.9957	0.001063	0.0097829	-0.96613
zinc finger CCHC-type containing 2 [Source:HGNC Symbol;Acc:HGNC:22916]	ENSG00000141664	54877	HGNC Symbol	ZCCHC2	protein_coding	11	3.6492	-1.2189	3.5493	-3.9935	0.0010678	0.009808	-0.97052
glutathione S-transferase omega 1 [Source:HGNC Symbol;Acc:HGNC:13312]	ENSG00000148834	9446	HGNC Symbol	GSTO1	protein_coding	7	5.3488	1.0464	4.9074	3.9904	0.0010748	0.0098638	-0.97698
ADP-ribose/CDP-alcohol diphosphatase, manganese dependent [Source:HGNC Symbol;Acc:HGNC:30925]	ENSG00000170222	56985	HGNC Symbol	ADPRM	protein_coding	4	4.2393	-1.2747	3.9127	-3.9901	0.0010755	0.0098638	-0.97759
RNA polymerase III subunit D [Source:HGNC Symbol;Acc:HGNC:1080]	ENSG00000168495	661	HGNC Symbol	POLR3D	protein_coding	5	3.5382	1.3048	3.7923	3.9887	0.0010787	0.009871	-0.98048
LSM1 homolog, mRNA degradation associated [Source:HGNC Symbol;Acc:HGNC:20472]	ENSG00000175324	27257	HGNC Symbol	LSM1	protein_coding	5	6.1566	0.7325	6.0653	3.9889	0.0010782	0.009871	-0.98004
MAP kinase activating death domain [Source:HGNC Symbol;Acc:HGNC:6766]	ENSG00000110514	8567	HGNC Symbol	MADD	protein_coding	23	4.9959	-1.8012	4.7939	-3.9886	0.0010788	0.009871	-0.98057
BTB domain containing 1 [Source:HGNC Symbol;Acc:HGNC:1120]	ENSG00000064726	53339	HGNC Symbol	BTBD1	protein_coding	5	4.0741	-0.80938	3.9416	-3.9866	0.0010834	0.0098981	-0.98475
ribonucleotide reductase regulatory subunit M2 [Source:HGNC Symbol;Acc:HGNC:10452]	ENSG00000171848	6241	HGNC Symbol	RRM2	protein_coding	19	4.8057	-1.4584	3.9863	-3.9868	0.001083	0.0098981	-0.9844
chaperonin containing TCP1 subunit 7 [Source:HGNC Symbol;Acc:HGNC:1622]	ENSG00000135624	10574	HGNC Symbol	CCT7	protein_coding	17	8.271	1.3713	8.5028	3.986	0.0010847	0.0099025	-0.98595
KIAA1109 [Source:HGNC Symbol;Acc:HGNC:26953]	ENSG00000138688	84162	HGNC Symbol	KIAA1109	protein_coding	16	5.2533	-2.2415	4.953	-3.9782	0.0011025	0.010057	-1.0019
N-acylsphingosine amidohydrolase 2B [Source:HGNC Symbol;Acc:HGNC:23456]	ENSG00000204147	653308	HGNC Symbol	ASAH2B	protein_coding	7	1.5333	1.751	1.3936	3.9765	0.0011063	0.010085	-1.0054
proteasome subunit alpha 3 [Source:HGNC Symbol;Acc:HGNC:9532]	ENSG00000100567	5684	HGNC Symbol	PSMA3	protein_coding	13	8.3347	1.3977	8.4175	3.9758	0.0011081	0.010094	-1.007
twinfilin actin binding protein 1 [Source:HGNC Symbol;Acc:HGNC:9620]	ENSG00000151239	5756	HGNC Symbol	TWF1	protein_coding	11	4.4188	-1.3286	4.4234	-3.9742	0.0011117	0.010119	-1.0101
solute carrier family 2 member 14 [Source:HGNC Symbol;Acc:HGNC:18301]	ENSG00000173262	144195	HGNC Symbol	SLC2A14	protein_coding	21	3.9604	-1.2314	3.6037	-3.9737	0.0011129	0.01012	-1.0111
cytoplasmic linker associated protein 2 [Source:HGNC Symbol;Acc:HGNC:17078]	ENSG00000163539	23122	HGNC Symbol	CLASP2	protein_coding	26	4.8694	-1.4009	4.4949	-3.9735	0.0011135	0.01012	-1.0117
DnaJ heat shock protein family (Hsp40) member B12 [Source:HGNC Symbol;Acc:HGNC:14891]	ENSG00000148719	54788	HGNC Symbol	DNAJB12	protein_coding	6	5.4154	0.7657	5.4443	3.9728	0.0011151	0.010126	-1.0131
novel transcript	ENSG00000261474	NA	Clone-based (Ensembl) gene	AC026471.4	lincRNA	1	2.9165	0.9344	2.6834	3.9719	0.0011173	0.010135	-1.015
glutamine and serine rich 1 [Source:HGNC Symbol;Acc:HGNC:26154]	ENSG00000060749	79832	HGNC Symbol	QSER1	protein_coding	7	2.5322	-1.1577	2.0537	-3.9716	0.0011178	0.010135	-1.0155
terminal nucleotidyltransferase 5A [Source:HGNC Symbol;Acc:HGNC:18345]	ENSG00000112773	55603	HGNC Symbol	TENT5A	protein_coding	5	5.3645	-1.6905	5.0286	-3.9683	0.0011255	0.010198	-1.0223
coiled-coil domain containing 69 [Source:HGNC Symbol;Acc:HGNC:24487]	ENSG00000198624	26112	HGNC Symbol	CCDC69	protein_coding	8	6.05	-0.9858	6.3381	-3.9674	0.0011276	0.010209	-1.0241
replication factor C subunit 4 [Source:HGNC Symbol;Acc:HGNC:9972]	ENSG00000163918	5984	HGNC Symbol	RFC4	protein_coding	14	6.1064	1.3898	5.9141	3.9661	0.0011309	0.010224	-1.0269
ankyrin repeat domain 36 [Source:HGNC Symbol;Acc:HGNC:24079]	ENSG00000135976	375248	HGNC Symbol	ANKRD36	protein_coding	8	5.8039	-1.4723	5.8046	-3.966	0.001131	0.010224	-1.027
threonyl-tRNA synthetase [Source:HGNC Symbol;Acc:HGNC:11572]	ENSG00000113407	6897	HGNC Symbol	TARS	protein_coding	16	8.0312	2.0134	8.0697	3.9644	0.0011348	0.010244	-1.0303
glutaredoxin 3 [Source:HGNC Symbol;Acc:HGNC:15987]	ENSG00000108010	10539	HGNC Symbol	GLRX3	protein_coding	6	6.2736	0.96755	6.2863	3.9644	0.0011349	0.010244	-1.0304
tripeptidyl peptidase 2 [Source:HGNC Symbol;Acc:HGNC:12016]	ENSG00000134900	7174	HGNC Symbol	TPP2	protein_coding	17	5.7262	-1.2143	5.5373	-3.9638	0.0011363	0.010246	-1.0316
E1A binding protein p300 [Source:HGNC Symbol;Acc:HGNC:3373]	ENSG00000100393	2033	HGNC Symbol	EP300	protein_coding	12	5.4252	-1.4664	5.2572	-3.9635	0.0011368	0.010246	-1.0321
RecQ mediated genome instability 1 [Source:HGNC Symbol;Acc:HGNC:25764]	ENSG00000178966	80010	HGNC Symbol	RMI1	protein_coding	2	3.0519	1.3853	2.4146	3.9624	0.0011395	0.010251	-1.0344
cytochrome c oxidase subunit 7A2 like [Source:HGNC Symbol;Acc:HGNC:2289]	ENSG00000115944	9167	HGNC Symbol	COX7A2L	protein_coding	8	8.0485	0.8505	7.9013	3.9622	0.00114	0.010251	-1.0348
TRAF2 and NCK interacting kinase [Source:HGNC Symbol;Acc:HGNC:30765]	ENSG00000154310	23043	HGNC Symbol	TNIK	protein_coding	15	4.8065	-1.9582	4.525	-3.9629	0.0011383	0.010251	-1.0334
tryptophanyl-tRNA synthetase [Source:HGNC Symbol;Acc:HGNC:12729]	ENSG00000140105	7453	HGNC Symbol	WARS	protein_coding	44	9.5583	3.6631	10.456	3.9589	0.0011479	0.010297	-1.0415
flap structure-specific endonuclease 1 [Source:HGNC Symbol;Acc:HGNC:3650]	ENSG00000168496	2237	HGNC Symbol	FEN1	protein_coding	3	6.4116	2.1557	6.3077	3.9588	0.0011482	0.010297	-1.0419
nucleic acid binding protein 1 [Source:HGNC Symbol;Acc:HGNC:26232]	ENSG00000173559	64859	HGNC Symbol	NABP1	protein_coding	10	6.2217	1.4552	6.0452	3.9583	0.0011494	0.010297	-1.0429
proteasome subunit beta 3 [Source:HGNC Symbol;Acc:HGNC:9540]	ENSG00000277791	5691	HGNC Symbol	PSMB3	protein_coding	6	9.2322	1.0486	9.2943	3.9594	0.0011467	0.010297	-1.0406
protein kinase N1 [Source:HGNC Symbol;Acc:HGNC:9405]	ENSG00000123143	5585	HGNC Symbol	PKN1	protein_coding	15	3.3424	-2.0104	3.0974	-3.9586	0.0011487	0.010297	-1.0423
zeta chain of T cell receptor associated protein kinase 70 [Source:HGNC Symbol;Acc:HGNC:12858]	ENSG00000115085	7535	HGNC Symbol	ZAP70	protein_coding	8	4.2999	-2.3756	4.0688	-3.9577	0.0011509	0.010303	-1.0441
transforming growth factor beta 1 [Source:NCBI gene;Acc:7040]	ENSG00000105329	7040	Clone-based (Ensembl) gene	AC011462.1	protein_coding	4	3.0392	-2.0796	2.5846	-3.9565	0.0011537	0.010321	-1.0466
TNF alpha induced protein 8 like 2 [Source:HGNC Symbol;Acc:HGNC:26277]	ENSG00000163154	79626	HGNC Symbol	TNFAIP8L2	protein_coding	1	6.0345	2.3344	4.8027	3.9547	0.0011582	0.010334	-1.0503
Sec23 homolog B, coat complex II component [Source:HGNC Symbol;Acc:HGNC:10702]	ENSG00000101310	10483	HGNC Symbol	SEC23B	protein_coding	12	7.9878	1.9434	8.1922	3.9555	0.0011563	0.010334	-1.0487
adenosylmethionine decarboxylase 1 [Source:HGNC Symbol;Acc:HGNC:457]	ENSG00000123505	262	HGNC Symbol	AMD1	protein_coding	8	6.4539	-0.94539	6.6063	-3.9541	0.0011595	0.010334	-1.0515
golgi glycoprotein 1 [Source:HGNC Symbol;Acc:HGNC:4316]	ENSG00000090863	2734	HGNC Symbol	GLG1	protein_coding	14	6.3371	-1.26	6.342	-3.9541	0.0011594	0.010334	-1.0514
GIT ArfGAP 2 [Source:HGNC Symbol;Acc:HGNC:4273]	ENSG00000139436	9815	HGNC Symbol	GIT2	protein_coding	20	5.3958	-1.3915	5.1642	-3.9543	0.0011591	0.010334	-1.0511
integrator complex subunit 14 [Source:HGNC Symbol;Acc:HGNC:25372]	ENSG00000138614	81556	HGNC Symbol	INTS14	protein_coding	18	6.2714	0.9144	6.0161	3.9528	0.0011627	0.010342	-1.0542
protein tyrosine phosphatase, receptor type A [Source:HGNC Symbol;Acc:HGNC:9664]	ENSG00000132670	5786	HGNC Symbol	PTPRA	protein_coding	8	5.0089	-1.6041	4.928	-3.9528	0.0011628	0.010342	-1.0542
autophagy related 2A [Source:HGNC Symbol;Acc:HGNC:29028]	ENSG00000110046	23130	HGNC Symbol	ATG2A	protein_coding	6	2.6238	-2.0458	1.8782	-3.9527	0.001163	0.010342	-1.0544
mitogen-activated protein kinase kinase kinase kinase 5 [Source:HGNC Symbol;Acc:HGNC:6867]	ENSG00000012983	11183	HGNC Symbol	MAP4K5	protein_coding	10	4.1506	-0.97243	4.2059	-3.9514	0.001166	0.010356	-1.057
coiled-coil domain containing 186 [Source:HGNC Symbol;Acc:HGNC:24349]	ENSG00000165813	55088	HGNC Symbol	CCDC186	protein_coding	7	5.6371	-1.4522	5.6255	-3.9513	0.0011663	0.010356	-1.0572
centrosomal protein 19 [Source:HGNC Symbol;Acc:HGNC:28209]	ENSG00000174007	84984	HGNC Symbol	CEP19	protein_coding	2	3.7635	1.672	2.9437	3.9501	0.0011693	0.01036	-1.0597
ribosomal protein L17 [Source:HGNC Symbol;Acc:HGNC:10307]	ENSG00000265681	6139	HGNC Symbol	RPL17	protein_coding	24	1.5198	-1.0794	2.0316	-3.9503	0.0011688	0.01036	-1.0593
CLN5, intracellular trafficking protein [Source:HGNC Symbol;Acc:HGNC:2076]	ENSG00000102805	1203	HGNC Symbol	CLN5	protein_coding	20	1.5251	-1.4544	0.94571	-3.9505	0.0011684	0.01036	-1.0589
phosphodiesterase 6B [Source:HGNC Symbol;Acc:HGNC:8786]	ENSG00000133256	5158	HGNC Symbol	PDE6B	protein_coding	12	4.9689	-1.239	4.6462	-3.9493	0.0011713	0.010366	-1.0613
solute carrier family 15 member 4 [Source:HGNC Symbol;Acc:HGNC:23090]	ENSG00000139370	121260	HGNC Symbol	SLC15A4	protein_coding	8	5.8174	-1.5458	5.9047	-3.9491	0.0011718	0.010366	-1.0618
granzyme B [Source:HGNC Symbol;Acc:HGNC:4709]	ENSG00000100453	3002	HGNC Symbol	GZMB	protein_coding	9	12.007	2.2005	12.988	3.948	0.0011744	0.010382	-1.064
asparagine synthetase (glutamine-hydrolyzing) [Source:HGNC Symbol;Acc:HGNC:753]	ENSG00000070669	440	HGNC Symbol	ASNS	protein_coding	17	6.33	1.988	6.6446	3.9472	0.0011764	0.010384	-1.0656
Yip1 interacting factor homolog B, membrane trafficking protein [Source:HGNC Symbol;Acc:HGNC:30511]	ENSG00000167645	90522	HGNC Symbol	YIF1B	protein_coding	16	3.7244	1.2126	3.6893	3.9474	0.0011759	0.010384	-1.0652
sulfatase modifying factor 2 [Source:HGNC Symbol;Acc:HGNC:20415]	ENSG00000129103	25870	HGNC Symbol	SUMF2	protein_coding	23	7.0093	-0.65173	7.0166	-3.9459	0.0011796	0.010404	-1.0683
exosome component 8 [Source:HGNC Symbol;Acc:HGNC:17035]	ENSG00000120699	11340	HGNC Symbol	EXOSC8	protein_coding	11	8.1607	1.0897	8.4186	3.9454	0.0011807	0.010407	-1.0692
SAM domain, SH3 domain and nuclear localization signals 1 [Source:HGNC Symbol;Acc:HGNC:10528]	ENSG00000155307	64092	HGNC Symbol	SAMSN1	protein_coding	12	8.523	3.3869	8.6269	3.9421	0.0011891	0.010473	-1.0762
leucine zipper and EF-hand containing transmembrane protein 1 [Source:HGNC Symbol;Acc:HGNC:6556]	ENSG00000168924	3954	HGNC Symbol	LETM1	protein_coding	7	5.2439	0.71289	5.2819	3.9407	0.0011925	0.010488	-1.079
ubiquitin specific peptidase 24 [Source:HGNC Symbol;Acc:HGNC:12623]	ENSG00000162402	23358	HGNC Symbol	USP24	protein_coding	7	5.8105	-1.4541	5.7505	-3.941	0.0011919	0.010488	-1.0785
hypoxanthine phosphoribosyltransferase 1 [Source:HGNC Symbol;Acc:HGNC:5157]	ENSG00000165704	3251	HGNC Symbol	HPRT1	protein_coding	3	6.0766	0.96772	5.9373	3.9398	0.0011946	0.010499	-1.0808
solute carrier family 25 member 45 [Source:HGNC Symbol;Acc:HGNC:27442]	ENSG00000162241	283130	HGNC Symbol	SLC25A45	protein_coding	15	4.5211	-1.9821	3.9984	-3.9388	0.0011973	0.010514	-1.0829
leucine zipper and EF-hand containing transmembrane protein 2 [Source:HGNC Symbol;Acc:HGNC:14648]	ENSG00000165046	137994	HGNC Symbol	LETM2	protein_coding	15	2.0542	-1.5899	1.5576	-3.938	0.0011992	0.010523	-1.0845
histidyl-tRNA synthetase 2, mitochondrial [Source:HGNC Symbol;Acc:HGNC:4817]	ENSG00000112855	23438	HGNC Symbol	HARS2	protein_coding	21	5.1949	-1.2481	5.0465	-3.9367	0.0012025	0.010542	-1.0872
nuclear receptor coactivator 2 [Source:HGNC Symbol;Acc:HGNC:7669]	ENSG00000140396	10499	HGNC Symbol	NCOA2	protein_coding	8	4.482	-1.8055	4.2491	-3.9365	0.0012031	0.010542	-1.0877
phosphatidylinositol transfer protein beta [Source:HGNC Symbol;Acc:HGNC:9002]	ENSG00000180957	23760	HGNC Symbol	PITPNB	protein_coding	11	7.1473	1.4078	7.2716	3.9355	0.0012057	0.010557	-1.0898
structural maintenance of chromosomes 5 [Source:HGNC Symbol;Acc:HGNC:20465]	ENSG00000198887	23137	HGNC Symbol	SMC5	protein_coding	4	5.7285	-0.73673	5.9681	-3.9339	0.0012096	0.010562	-1.093
emerin [Source:HGNC Symbol;Acc:HGNC:3331]	ENSG00000102119	2010	HGNC Symbol	EMD	protein_coding	9	2.0496	-1.0914	2.3717	-3.9346	0.001208	0.010562	-1.0916
inositol hexakisphosphate kinase 2 [Source:HGNC Symbol;Acc:HGNC:17313]	ENSG00000068745	51447	HGNC Symbol	IP6K2	protein_coding	28	6.4418	-1.4217	6.2445	-3.9345	0.0012081	0.010562	-1.0917
Fc receptor like 6 [Source:HGNC Symbol;Acc:HGNC:31910]	ENSG00000181036	343413	HGNC Symbol	FCRL6	protein_coding	7	4.7277	-6.1995	4.3584	-3.9338	0.0012098	0.010562	-1.0931
zinc finger protein 136 [Source:HGNC Symbol;Acc:HGNC:12920]	ENSG00000196646	7695	HGNC Symbol	ZNF136	protein_coding	7	4.9194	-1.3246	4.7506	-3.933	0.0012119	0.010572	-1.0948
terminal nucleotidyltransferase 4A [Source:HGNC Symbol;Acc:HGNC:16705]	ENSG00000112941	11044	HGNC Symbol	TENT4A	protein_coding	7	2.818	-0.85973	2.6603	-3.9319	0.0012148	0.01059	-1.0971
methylenetetrahydrofolate dehydrogenase (NADP+ dependent) 2, methenyltetrahydrofolate cyclohydrolase [Source:HGNC Symbol;Acc:HGNC:7434]	ENSG00000065911	10797	HGNC Symbol	MTHFD2	protein_coding	8	8.1426	3.1161	8.4056	3.9299	0.0012197	0.010625	-1.1011
glycogen synthase kinase 3 beta [Source:HGNC Symbol;Acc:HGNC:4617]	ENSG00000082701	2932	HGNC Symbol	GSK3B	protein_coding	5	3.8701	-0.83629	3.7741	-3.9295	0.0012208	0.010628	-1.102
integrin subunit alpha X [Source:HGNC Symbol;Acc:HGNC:6152]	ENSG00000140678	3687	HGNC Symbol	ITGAX	protein_coding	7	6.6908	-2.2289	6.7498	-3.9282	0.0012242	0.010649	-1.1048
N-terminal asparagine amidase [Source:HGNC Symbol;Acc:HGNC:29909]	ENSG00000157045	123803	HGNC Symbol	NTAN1	protein_coding	12	4.2223	-1.9484	3.7016	-3.9272	0.0012267	0.010663	-1.1068
zinc finger protein 317 [Source:HGNC Symbol;Acc:HGNC:13507]	ENSG00000130803	57693	HGNC Symbol	ZNF317	protein_coding	6	6.2094	-1.387	6.0934	-3.9268	0.0012277	0.010664	-1.1076
midnolin [Source:HGNC Symbol;Acc:HGNC:16298]	ENSG00000167470	90007	HGNC Symbol	MIDN	protein_coding	6	2.697	-1.9624	2.2388	-3.9263	0.0012289	0.010667	-1.1085
perforin 1 [Source:HGNC Symbol;Acc:HGNC:9360]	ENSG00000180644	5551	HGNC Symbol	PRF1	protein_coding	4	10.285	1.0008	10.515	3.924	0.001235	0.010712	-1.1134
nuclear autoantigenic sperm protein [Source:HGNC Symbol;Acc:HGNC:7644]	ENSG00000132780	4678	HGNC Symbol	NASP	protein_coding	25	7.8412	0.94876	7.9675	3.922	0.00124	0.010732	-1.1173
ArfGAP with GTPase domain, ankyrin repeat and PH domain 1 [Source:HGNC Symbol;Acc:HGNC:16922]	ENSG00000157985	116987	HGNC Symbol	AGAP1	protein_coding	14	2.576	-2.745	1.7801	-3.9222	0.0012396	0.010732	-1.117
transcription factor 7 [Source:HGNC Symbol;Acc:HGNC:11639]	ENSG00000081059	6932	HGNC Symbol	TCF7	protein_coding	24	4.1647	-3.6669	2.8446	-3.9227	0.0012383	0.010732	-1.1159
Pim-2 proto-oncogene, serine/threonine kinase [Source:HGNC Symbol;Acc:HGNC:8987]	ENSG00000102096	11040	HGNC Symbol	PIM2	protein_coding	3	7.5378	1.8729	7.6548	3.9202	0.0012447	0.010734	-1.121
transmembrane protein 150A [Source:HGNC Symbol;Acc:HGNC:24677]	ENSG00000168890	129303	HGNC Symbol	TMEM150A	protein_coding	12	2.7553	1.0517	3.0222	3.9212	0.0012423	0.010734	-1.1191
endosulfine alpha [Source:HGNC Symbol;Acc:HGNC:3360]	ENSG00000143420	2029	HGNC Symbol	ENSA	protein_coding	15	7.3113	0.68073	7.443	3.9204	0.0012443	0.010734	-1.1207
TAO kinase 3 [Source:HGNC Symbol;Acc:HGNC:18133]	ENSG00000135090	51347	HGNC Symbol	TAOK3	protein_coding	19	7.2202	-0.9826	6.9893	-3.9215	0.0012414	0.010734	-1.1185
VPS54, GARP complex subunit [Source:HGNC Symbol;Acc:HGNC:18652]	ENSG00000143952	51542	HGNC Symbol	VPS54	protein_coding	4	3.6333	-1.102	3.3594	-3.9203	0.0012446	0.010734	-1.1209
nudix hydrolase 9 [Source:HGNC Symbol;Acc:HGNC:8056]	ENSG00000170502	53343	HGNC Symbol	NUDT9	protein_coding	8	4.5819	0.68146	4.5321	3.9182	0.0012501	0.010773	-1.1253
mitochondrial ribosomal protein S17 [Source:HGNC Symbol;Acc:HGNC:14047]	ENSG00000239789	51373	HGNC Symbol	MRPS17	protein_coding	2	4.9583	0.90694	5.0651	3.9172	0.0012526	0.010786	-1.1272
transducer of ERBB2, 1 [Source:HGNC Symbol;Acc:HGNC:11979]	ENSG00000141232	10140	HGNC Symbol	TOB1	protein_coding	3	5.8287	-2.434	5.8213	-3.9159	0.0012561	0.010809	-1.1299
small nuclear ribonucleoprotein U11/U12 subunit 25 [Source:HGNC Symbol;Acc:HGNC:14161]	ENSG00000161981	79622	HGNC Symbol	SNRNP25	protein_coding	7	4.1863	1.3137	3.853	3.9146	0.0012596	0.010816	-1.1327
corepressor interacting with RBPJ, 1 [Source:HGNC Symbol;Acc:HGNC:24217]	ENSG00000138433	9541	HGNC Symbol	CIR1	protein_coding	5	6.4602	-1.6318	6.0134	-3.9152	0.0012579	0.010816	-1.1314
solute carrier family 4 member 4 [Source:HGNC Symbol;Acc:HGNC:11030]	ENSG00000080493	8671	HGNC Symbol	SLC4A4	protein_coding	9	2.8251	-2.2246	2.1061	-3.9146	0.0012594	0.010816	-1.1326
galactosidase alpha [Source:HGNC Symbol;Acc:HGNC:4296]	ENSG00000102393	2717	HGNC Symbol	GLA	protein_coding	8	5.5983	-0.70334	5.8054	-3.9134	0.0012628	0.010835	-1.1352
DEP domain containing 1B [Source:HGNC Symbol;Acc:HGNC:24902]	ENSG00000035499	55789	HGNC Symbol	DEPDC1B	protein_coding	6	3.043	1.6009	1.809	3.9121	0.0012662	0.010849	-1.1378
E2F associated phosphoprotein [Source:HGNC Symbol;Acc:HGNC:19312]	ENSG00000129518	55837	HGNC Symbol	EAPP	protein_coding	5	7.5144	-1.6137	7.1239	-3.9123	0.0012655	0.010849	-1.1373
TBC1 domain family member 32 [Source:HGNC Symbol;Acc:HGNC:21485]	ENSG00000146350	221322	HGNC Symbol	TBC1D32	protein_coding	9	2.8921	-1.7978	2.359	-3.9108	0.0012696	0.010871	-1.1405
rearranged L-myc fusion [Source:HGNC Symbol;Acc:HGNC:10025]	ENSG00000117000	6018	HGNC Symbol	RLF	protein_coding	1	4.581	-1.3856	4.4883	-3.9094	0.0012733	0.010894	-1.1433
interferon related developmental regulator 2 [Source:HGNC Symbol;Acc:HGNC:5457]	ENSG00000214706	7866	HGNC Symbol	IFRD2	protein_coding	15	3.4119	2.2335	3.8792	3.909	0.0012744	0.010896	-1.1442
potassium channel tetramerization domain containing 10 [Source:HGNC Symbol;Acc:HGNC:23236]	ENSG00000110906	83892	HGNC Symbol	KCTD10	protein_coding	16	4.9243	-1.0529	4.7668	-3.9078	0.0012776	0.010916	-1.1466
ST8 alpha-N-acetyl-neuraminide alpha-2,8-sialyltransferase 4 [Source:HGNC Symbol;Acc:HGNC:10871]	ENSG00000113532	7903	HGNC Symbol	ST8SIA4	protein_coding	4	5.9319	1.6925	5.9325	3.9048	0.0012856	0.010968	-1.1527
A-kinase anchoring protein 8 [Source:HGNC Symbol;Acc:HGNC:378]	ENSG00000105127	10270	HGNC Symbol	AKAP8	protein_coding	5	4.4862	-0.7756	4.4375	-3.9051	0.0012849	0.010968	-1.1522
H2A histone family member Z [Source:HGNC Symbol;Acc:HGNC:4741]	ENSG00000164032	3015	HGNC Symbol	H2AFZ	protein_coding	7	9.87	1.1073	9.407	3.904	0.0012878	0.010979	-1.1544
zinc finger RANBP2-type containing 1 [Source:HGNC Symbol;Acc:HGNC:18224]	ENSG00000019995	54764	HGNC Symbol	ZRANB1	protein_coding	2	2.8745	-1.4383	2.6982	-3.9036	0.0012889	0.010981	-1.1553
paraoxonase 2 [Source:HGNC Symbol;Acc:HGNC:9205]	ENSG00000105854	5445	HGNC Symbol	PON2	protein_coding	18	4.5886	-1.5862	4.4527	-3.9023	0.0012922	0.011001	-1.1578
succinate dehydrogenase complex assembly factor 2 [Source:HGNC Symbol;Acc:HGNC:26034]	ENSG00000167985	54949	HGNC Symbol	SDHAF2	protein_coding	8	6.0075	0.78803	5.8864	3.9006	0.0012971	0.011035	-1.1615
protein tyrosine phosphatase, non-receptor type 2 [Source:HGNC Symbol;Acc:HGNC:9650]	ENSG00000175354	5771	HGNC Symbol	PTPN2	protein_coding	21	8.0428	1.1432	8.3337	3.8998	0.0012991	0.011044	-1.163
vacuolar protein sorting 72 homolog [Source:HGNC Symbol;Acc:HGNC:11644]	ENSG00000163159	6944	HGNC Symbol	VPS72	protein_coding	7	4.9311	0.81163	4.7075	3.8992	0.0013008	0.011051	-1.1643
phosphomannomutase 2 [Source:HGNC Symbol;Acc:HGNC:9115]	ENSG00000140650	5373	HGNC Symbol	PMM2	protein_coding	18	4.7503	1.1104	4.7853	3.8983	0.0013032	0.011063	-1.1661
BTB domain and CNC homolog 1 [Source:HGNC Symbol;Acc:HGNC:935]	ENSG00000156273	571	HGNC Symbol	BACH1	protein_coding	13	4.2411	-1.3766	4.0517	-3.896	0.0013096	0.011109	-1.1709
dyskerin pseudouridine synthase 1 [Source:HGNC Symbol;Acc:HGNC:2890]	ENSG00000130826	1736	HGNC Symbol	DKC1	protein_coding	13	7.1459	2.2066	7.3284	3.8927	0.0013185	0.011147	-1.1776
nuclear receptor subfamily 6 group A member 1 [Source:HGNC Symbol;Acc:HGNC:7985]	ENSG00000148200	2649	HGNC Symbol	NR6A1	protein_coding	5	2.9437	1.4293	2.4191	3.8921	0.0013202	0.011147	-1.1788
ATPase Na+/K+ transporting subunit beta 3 [Source:HGNC Symbol;Acc:HGNC:806]	ENSG00000069849	483	HGNC Symbol	ATP1B3	protein_coding	10	5.4973	1.1987	5.774	3.892	0.0013205	0.011147	-1.1791
2-aminoethanethiol dioxygenase [Source:HGNC Symbol;Acc:HGNC:23506]	ENSG00000181915	84890	HGNC Symbol	ADO	protein_coding	1	2.9849	1.1718	3.0992	3.8931	0.0013176	0.011147	-1.1769
suppressor of cytokine signaling 4 [Source:HGNC Symbol;Acc:HGNC:19392]	ENSG00000180008	122809	HGNC Symbol	SOCS4	protein_coding	4	4.0235	0.61562	3.8321	3.8922	0.00132	0.011147	-1.1786
F-box and leucine rich repeat protein 17 [Source:HGNC Symbol;Acc:HGNC:13615]	ENSG00000145743	64839	HGNC Symbol	FBXL17	protein_coding	6	2.3342	-1.6111	1.8967	-3.8927	0.0013187	0.011147	-1.1777
D-box binding PAR bZIP transcription factor [Source:HGNC Symbol;Acc:HGNC:2697]	ENSG00000105516	1628	HGNC Symbol	DBP	protein_coding	5	2.0774	-2.3096	1.1129	-3.8929	0.0013181	0.011147	-1.1773
uridine phosphorylase 1 [Source:HGNC Symbol;Acc:HGNC:12576]	ENSG00000183696	7378	HGNC Symbol	UPP1	protein_coding	12	6.3678	0.93456	6.7784	3.8915	0.001322	0.011152	-1.1801
electron transfer flavoprotein regulatory factor 1 [Source:HGNC Symbol;Acc:HGNC:27052]	ENSG00000205707	144363	HGNC Symbol	ETFRF1	protein_coding	11	4.6549	-1.0636	4.7294	-3.8909	0.0013235	0.011157	-1.1812
arginine and serine rich protein 1 [Source:HGNC Symbol;Acc:HGNC:25234]	ENSG00000117616	57035	HGNC Symbol	RSRP1	protein_coding	22	6.1031	-1.978	6.2059	-3.8894	0.0013277	0.011184	-1.1843
mitochondrial ribosomal protein S23 [Source:HGNC Symbol;Acc:HGNC:14509]	ENSG00000181610	51649	HGNC Symbol	MRPS23	protein_coding	4	7.058	1.0038	6.8792	3.8875	0.0013331	0.011222	-1.1884
tumor susceptibility 101 [Source:HGNC Symbol;Acc:HGNC:15971]	ENSG00000074319	7251	HGNC Symbol	TSG101	protein_coding	12	6.2575	0.64652	5.9921	3.8866	0.0013355	0.011234	-1.1901
zinc finger protein 593 [Source:HGNC Symbol;Acc:HGNC:30943]	ENSG00000142684	51042	HGNC Symbol	ZNF593	protein_coding	2	2.4521	1.7079	2.6686	3.8851	0.0013397	0.011262	-1.1932
kelch like ECH associated protein 1 [Source:HGNC Symbol;Acc:HGNC:23177]	ENSG00000079999	9817	HGNC Symbol	KEAP1	protein_coding	10	3.9815	1.0432	3.7085	3.8846	0.0013412	0.011266	-1.1943
nuclear pore complex interacting protein family member B4 [Source:HGNC Symbol;Acc:HGNC:41985]	ENSG00000185864	440345	HGNC Symbol	NPIPB4	protein_coding	22	3.64	-1.2078	3.7515	-3.8842	0.0013423	0.011268	-1.1951
HLA complex group 27 [Source:HGNC Symbol;Acc:HGNC:27366]	ENSG00000206344	NA	HGNC Symbol	HCG27	lincRNA	5	1.725	-2.5467	1.7054	-3.882	0.0013484	0.011311	-1.1995
DNA cross-link repair 1B [Source:HGNC Symbol;Acc:HGNC:17641]	ENSG00000118655	64858	HGNC Symbol	DCLRE1B	protein_coding	5	3.9603	1.2685	3.6668	3.8808	0.0013518	0.011323	-1.202
zinc finger protein 451 [Source:HGNC Symbol;Acc:HGNC:21091]	ENSG00000112200	26036	HGNC Symbol	ZNF451	protein_coding	18	5.4796	-1.2399	5.1803	-3.8809	0.0013515	0.011323	-1.2018
R3H domain containing 2 [Source:HGNC Symbol;Acc:HGNC:29167]	ENSG00000179912	22864	HGNC Symbol	R3HDM2	protein_coding	15	5.3895	-1.2661	5.4914	-3.8786	0.0013581	0.011368	-1.2065
activating transcription factor 7 interacting protein 2 [Source:HGNC Symbol;Acc:HGNC:20397]	ENSG00000166669	80063	HGNC Symbol	ATF7IP2	protein_coding	18	4.5796	-1.4006	4.2496	-3.8777	0.0013606	0.011373	-1.2083
family with sequence similarity 19 member A2, C-C motif chemokine like [Source:HGNC Symbol;Acc:HGNC:21589]	ENSG00000198673	338811	HGNC Symbol	FAM19A2	protein_coding	16	1.7053	-1.6761	1.1332	-3.878	0.0013598	0.011373	-1.2078
NFKB inhibitor epsilon [Source:HGNC Symbol;Acc:HGNC:7799]	ENSG00000146232	4794	HGNC Symbol	NFKBIE	protein_coding	4	1.6349	-1.4314	1.8302	-3.8762	0.0013651	0.011403	-1.2116
ERCC excision repair 5, endonuclease [Source:HGNC Symbol;Acc:HGNC:3437]	ENSG00000134899	2073	HGNC Symbol	ERCC5	protein_coding	15	4.2244	-1.5402	4.054	-3.8748	0.001369	0.011428	-1.2144
serine/threonine kinase 10 [Source:HGNC Symbol;Acc:HGNC:11388]	ENSG00000072786	6793	HGNC Symbol	STK10	protein_coding	16	6.862	-1.9239	6.5688	-3.8734	0.001373	0.011453	-1.2173
EF-hand domain containing 2 [Source:HGNC Symbol;Acc:HGNC:26233]	ENSG00000183690	80258	HGNC Symbol	EFHC2	protein_coding	2	3.5282	-2.5767	2.9582	-3.8724	0.001376	0.01147	-1.2194
indoleamine 2,3-dioxygenase 1 [Source:HGNC Symbol;Acc:HGNC:6059]	ENSG00000131203	3620	HGNC Symbol	IDO1	protein_coding	9	3.3103	3.0637	3.2566	3.8717	0.0013778	0.011477	-1.2207
aryl hydrocarbon receptor nuclear translocator like [Source:HGNC Symbol;Acc:HGNC:701]	ENSG00000133794	406	HGNC Symbol	ARNTL	protein_coding	21	4.5872	-1.6784	4.5157	-3.8708	0.0013804	0.011491	-1.2225
CDC28 protein kinase regulatory subunit 1B [Source:HGNC Symbol;Acc:HGNC:19083]	ENSG00000173207	1163	HGNC Symbol	CKS1B	protein_coding	7	6.1472	1.4144	5.5665	3.8695	0.0013844	0.011499	-1.2253
TNF receptor associated factor 6 [Source:HGNC Symbol;Acc:HGNC:12036]	ENSG00000175104	7189	HGNC Symbol	TRAF6	protein_coding	3	4.751	-1.1039	4.706	-3.8693	0.0013847	0.011499	-1.2256
forkhead box J2 [Source:HGNC Symbol;Acc:HGNC:24818]	ENSG00000065970	55810	HGNC Symbol	FOXJ2	protein_coding	3	3.4871	-1.2177	3.4386	-3.8694	0.0013847	0.011499	-1.2255
lymphoid restricted membrane protein [Source:HGNC Symbol;Acc:HGNC:6690]	ENSG00000118308	4033	HGNC Symbol	LRMP	protein_coding	21	6.3662	-3.3971	5.4649	-3.8692	0.0013852	0.011499	-1.2259
ubiquitin specific peptidase 31 [Source:HGNC Symbol;Acc:HGNC:20060]	ENSG00000103404	57478	HGNC Symbol	USP31	protein_coding	3	3.7355	0.77827	3.3746	3.8678	0.0013892	0.011514	-1.2288
suppression of tumorigenicity 7 like [Source:HGNC Symbol;Acc:HGNC:18441]	ENSG00000007341	54879	HGNC Symbol	ST7L	protein_coding	28	3.4529	-1.4168	3.2023	-3.8676	0.0013897	0.011514	-1.2291
kelch domain containing 2 [Source:HGNC Symbol;Acc:HGNC:20231]	ENSG00000165516	23588	HGNC Symbol	KLHDC2	protein_coding	11	3.2692	-1.8447	2.9073	-3.8676	0.0013899	0.011514	-1.2293
negative regulator of ubiquitin like proteins 1 [Source:HGNC Symbol;Acc:HGNC:17623]	ENSG00000013374	51667	HGNC Symbol	NUB1	protein_coding	12	6.3071	-1.1782	6.3998	-3.8661	0.0013941	0.011541	-1.2322
YY1 associated protein 1 [Source:HGNC Symbol;Acc:HGNC:30935]	ENSG00000163374	55249	HGNC Symbol	YY1AP1	protein_coding	25	5.5843	-0.98819	5.3514	-3.8649	0.0013977	0.011563	-1.2348
eukaryotic translation initiation factor 4E [Source:HGNC Symbol;Acc:HGNC:3287]	ENSG00000151247	1977	HGNC Symbol	EIF4E	protein_coding	11	7.7632	0.93638	7.618	3.8635	0.0014018	0.011588	-1.2376
influenza virus NS1A binding protein [Source:HGNC Symbol;Acc:HGNC:16951]	ENSG00000116679	10625	HGNC Symbol	IVNS1ABP	protein_coding	9	9.6806	2.2477	9.9646	3.8626	0.0014043	0.011602	-1.2394
eukaryotic translation elongation factor 1 alpha 1 [Source:HGNC Symbol;Acc:HGNC:3189]	ENSG00000156508	1915	HGNC Symbol	EEF1A1	protein_coding	11	12.739	-0.70425	12.607	-3.861	0.0014092	0.011634	-1.2427
C-X-C motif chemokine ligand 9 [Source:HGNC Symbol;Acc:HGNC:7098]	ENSG00000138755	4283	HGNC Symbol	CXCL9	protein_coding	1	2.6174	2.3396	2.8349	3.8584	0.0014169	0.011689	-1.2481
elongin C [Source:HGNC Symbol;Acc:HGNC:11617]	ENSG00000154582	6921	HGNC Symbol	ELOC	protein_coding	10	6.8628	1.5529	7.0978	3.8567	0.001422	0.011699	-1.2516
hydroxysteroid 17-beta dehydrogenase 4 [Source:HGNC Symbol;Acc:HGNC:5213]	ENSG00000133835	3295	HGNC Symbol	HSD17B4	protein_coding	41	5.3906	1.2887	5.4251	3.8571	0.0014208	0.011699	-1.2508
dynactin subunit 4 [Source:HGNC Symbol;Acc:HGNC:15518]	ENSG00000132912	51164	HGNC Symbol	DCTN4	protein_coding	15	5.0252	-1.2546	4.8056	-3.8573	0.0014202	0.011699	-1.2504
death effector domain containing 2 [Source:HGNC Symbol;Acc:HGNC:24450]	ENSG00000160570	162989	HGNC Symbol	DEDD2	protein_coding	13	3.7507	-1.8034	3.6739	-3.8567	0.001422	0.011699	-1.2516
DDB1 and CUL4 associated factor 5 [Source:HGNC Symbol;Acc:HGNC:20224]	ENSG00000139990	8816	HGNC Symbol	DCAF5	protein_coding	9	6.7886	-1.6111	6.6985	-3.8561	0.0014236	0.011704	-1.2527
chromosome 11 open reading frame 24 [Source:HGNC Symbol;Acc:HGNC:1174]	ENSG00000171067	53838	HGNC Symbol	C11orf24	protein_coding	9	2.4317	1.2042	2.7327	3.8552	0.0014264	0.011714	-1.2547
ubiquitin conjugating enzyme E2 I [Source:HGNC Symbol;Acc:HGNC:12485]	ENSG00000103275	7329	HGNC Symbol	UBE2I	protein_coding	19	6.9653	0.56879	6.9079	3.8551	0.0014267	0.011714	-1.2549
novel transcript	ENSG00000264112	NA	Clone-based (Ensembl) gene	AC015813.1	lincRNA	3	2.9116	-1.5734	2.7746	-3.8542	0.0014293	0.011719	-1.2566
ATM serine/threonine kinase [Source:HGNC Symbol;Acc:HGNC:795]	ENSG00000149311	472	HGNC Symbol	ATM	protein_coding	30	6.6004	-2.7152	6.1067	-3.8543	0.0014292	0.011719	-1.2566
N-acetyltransferase 10 [Source:HGNC Symbol;Acc:HGNC:29830]	ENSG00000135372	55226	HGNC Symbol	NAT10	protein_coding	10	5.9711	1.2477	5.9738	3.8534	0.0014318	0.011727	-1.2584
ubinuclein 1 [Source:HGNC Symbol;Acc:HGNC:12506]	ENSG00000118900	29855	HGNC Symbol	UBN1	protein_coding	9	4.1572	-1.2298	3.9604	-3.8533	0.0014322	0.011727	-1.2586
RNA 2',3'-cyclic phosphate and 5'-OH ligase [Source:HGNC Symbol;Acc:HGNC:26935]	ENSG00000100220	51493	HGNC Symbol	RTCB	protein_coding	6	8.1212	0.7516	8.1931	3.8504	0.0014409	0.011782	-1.2646
WD repeat containing antisense to TP53 [Source:HGNC Symbol;Acc:HGNC:25522]	ENSG00000141499	55135	HGNC Symbol	WRAP53	protein_coding	10	4.0841	0.75071	4.1035	3.8491	0.0014449	0.011782	-1.2673
ATP binding cassette subfamily B member 10 [Source:HGNC Symbol;Acc:HGNC:41]	ENSG00000135776	23456	HGNC Symbol	ABCB10	protein_coding	3	3.8069	-1.1455	3.5054	-3.8492	0.0014446	0.011782	-1.2671
SMAD family member 5 [Source:HGNC Symbol;Acc:HGNC:6771]	ENSG00000113658	4090	HGNC Symbol	SMAD5	protein_coding	12	5.2165	-1.1569	5.1917	-3.8499	0.0014422	0.011782	-1.2655
TSPO associated protein 1 [Source:HGNC Symbol;Acc:HGNC:16831]	ENSG00000005379	9256	HGNC Symbol	TSPOAP1	protein_coding	11	2.8635	-2.5961	2.1915	-3.8495	0.0014435	0.011782	-1.2663
spondin 2 [Source:HGNC Symbol;Acc:HGNC:11253]	ENSG00000159674	10417	HGNC Symbol	SPON2	protein_coding	22	3.5823	-4.7665	3.1177	-3.8494	0.0014438	0.011782	-1.2666
mitochondrial ribosomal protein S25 [Source:HGNC Symbol;Acc:HGNC:14511]	ENSG00000131368	64432	HGNC Symbol	MRPS25	protein_coding	7	4.5558	0.92307	4.743	3.8474	0.0014499	0.011811	-1.2707
peptidylprolyl isomerase like 4 [Source:HGNC Symbol;Acc:HGNC:15702]	ENSG00000131013	85313	HGNC Symbol	PPIL4	protein_coding	2	5.9914	-0.71911	5.6387	-3.8472	0.0014505	0.011811	-1.2711
insulin receptor substrate 2 [Source:HGNC Symbol;Acc:HGNC:6126]	ENSG00000185950	8660	HGNC Symbol	IRS2	protein_coding	1	3.6654	-2.7029	2.803	-3.8468	0.0014517	0.011811	-1.2719
NLR family pyrin domain containing 1 [Source:HGNC Symbol;Acc:HGNC:14374]	ENSG00000091592	22861	HGNC Symbol	NLRP1	protein_coding	16	5.516	-2.7697	5.0166	-3.8466	0.0014523	0.011811	-1.2723
ER membrane protein complex subunit 2 [Source:HGNC Symbol;Acc:HGNC:28963]	ENSG00000104412	9694	HGNC Symbol	EMC2	protein_coding	7	5.744	0.78411	5.5851	3.8423	0.0014654	0.011909	-1.2811
pre-mRNA processing factor 6 [Source:HGNC Symbol;Acc:HGNC:15860]	ENSG00000101161	24148	HGNC Symbol	PRPF6	protein_coding	1	4.6983	0.69699	4.6107	3.8419	0.0014666	0.011911	-1.2819
mitochondrial ribosomal protein L57 [Source:HGNC Symbol;Acc:HGNC:14514]	ENSG00000173141	78988	HGNC Symbol	MRPL57	protein_coding	1	5.5396	0.85553	5.5758	3.8413	0.0014686	0.011919	-1.2832
M-phase phosphoprotein 6 [Source:HGNC Symbol;Acc:HGNC:7214]	ENSG00000135698	10200	HGNC Symbol	MPHOSPH6	protein_coding	8	5.5985	1.6869	5.6878	3.8398	0.0014732	0.011948	-1.2863
glycolipid transfer protein [Source:HGNC Symbol;Acc:HGNC:24867]	ENSG00000139433	51228	HGNC Symbol	GLTP	protein_coding	6	6.5717	-1.4406	6.5262	-3.8387	0.0014767	0.011969	-1.2886
abhydrolase domain containing 17C [Source:HGNC Symbol;Acc:HGNC:26925]	ENSG00000136379	58489	HGNC Symbol	ABHD17C	protein_coding	5	1.4288	1.2794	1.0864	3.8376	0.0014799	0.011986	-1.2907
PBX homeobox 2 [Source:HGNC Symbol;Acc:HGNC:8633]	ENSG00000204304	5089	HGNC Symbol	PBX2	protein_coding	5	1.9419	-0.93273	1.8351	-3.8365	0.0014835	0.012007	-1.2931
ligand dependent nuclear receptor interacting factor 1 [Source:HGNC Symbol;Acc:HGNC:30299]	ENSG00000121931	55791	HGNC Symbol	LRIF1	protein_coding	3	5.8436	0.85706	5.7861	3.8351	0.0014878	0.012014	-1.2959
signal peptide peptidase like 2A [Source:HGNC Symbol;Acc:HGNC:30227]	ENSG00000138600	84888	HGNC Symbol	SPPL2A	protein_coding	7	5.7293	0.81237	5.8007	3.8351	0.0014878	0.012014	-1.2959
ring finger protein 111 [Source:HGNC Symbol;Acc:HGNC:17384]	ENSG00000157450	54778	HGNC Symbol	RNF111	protein_coding	12	3.9617	-1.1876	3.8724	-3.835	0.001488	0.012014	-1.2961
RB1 inducible coiled-coil 1 [Source:HGNC Symbol;Acc:HGNC:15574]	ENSG00000023287	9821	HGNC Symbol	RB1CC1	protein_coding	10	5.6011	-1.7083	5.2268	-3.8349	0.0014883	0.012014	-1.2963
ubiquitin conjugating enzyme E2 L3 [Source:HGNC Symbol;Acc:HGNC:12488]	ENSG00000185651	7332	HGNC Symbol	UBE2L3	protein_coding	4	8.227	0.89992	8.4883	3.8337	0.0014923	0.012037	-1.2989
apoptosis resistant E3 ubiquitin protein ligase 1 [Source:HGNC Symbol;Acc:HGNC:20363]	ENSG00000119682	9870	HGNC Symbol	AREL1	protein_coding	17	5.1201	-1.0927	4.8864	-3.8324	0.0014962	0.012053	-1.3014
nucleoporin 133 [Source:HGNC Symbol;Acc:HGNC:18016]	ENSG00000069248	55746	HGNC Symbol	NUP133	protein_coding	4	4.7478	-1.1471	4.494	-3.8325	0.001496	0.012053	-1.3013
CCZ1 homolog, vacuolar protein trafficking and biogenesis associated [Source:HGNC Symbol;Acc:HGNC:21691]	ENSG00000122674	51622	HGNC Symbol	CCZ1	protein_coding	7	3.8202	-0.81522	3.5383	-3.832	0.0014975	0.012056	-1.3023
high mobility group nucleosomal binding domain 4 [Source:HGNC Symbol;Acc:HGNC:4989]	ENSG00000182952	10473	HGNC Symbol	HMGN4	protein_coding	2	5.8896	0.80011	5.8632	3.8287	0.0015078	0.012122	-1.309
mitochondrial ribosomal protein L19 [Source:HGNC Symbol;Acc:HGNC:14052]	ENSG00000115364	9801	HGNC Symbol	MRPL19	protein_coding	7	3.7873	0.7856	3.6531	3.8288	0.0015077	0.012122	-1.3089
paxillin [Source:HGNC Symbol;Acc:HGNC:9718]	ENSG00000089159	5829	HGNC Symbol	PXN	protein_coding	22	5.5418	-1.6187	5.5582	-3.8276	0.0015115	0.012144	-1.3115
Myb/SANT DNA binding domain containing 4 with coiled-coils [Source:HGNC Symbol;Acc:HGNC:29383]	ENSG00000170903	84437	HGNC Symbol	MSANTD4	protein_coding	6	3.6164	1.0956	3.0456	3.8271	0.0015129	0.012147	-1.3123
interferon induced protein 44 [Source:HGNC Symbol;Acc:HGNC:16938]	ENSG00000137965	10561	HGNC Symbol	IFI44	protein_coding	9	3.5242	-1.8056	3.2658	-3.8266	0.0015146	0.012152	-1.3134
carbonic anhydrase 5B [Source:HGNC Symbol;Acc:HGNC:1378]	ENSG00000169239	11238	HGNC Symbol	CA5B	protein_coding	10	5.9873	-1.5399	5.8537	-3.8263	0.0015157	0.012153	-1.3141
forkhead box J3 [Source:HGNC Symbol;Acc:HGNC:29178]	ENSG00000198815	22887	HGNC Symbol	FOXJ3	protein_coding	9	4.6889	-0.81322	4.6445	-3.8227	0.0015269	0.01221	-1.3213
CWC15 spliceosome associated protein homolog [Source:HGNC Symbol;Acc:HGNC:26939]	ENSG00000150316	51503	HGNC Symbol	CWC15	protein_coding	6	7.2261	-0.85398	7.1516	-3.823	0.001526	0.01221	-1.3208
C-type lectin domain family 2 member B [Source:HGNC Symbol;Acc:HGNC:2053]	ENSG00000110852	9976	HGNC Symbol	CLEC2B	protein_coding	4	8.507	-1.0958	8.3022	-3.8229	0.0015264	0.01221	-1.321
mediator complex subunit 13 like [Source:HGNC Symbol;Acc:HGNC:22962]	ENSG00000123066	23389	HGNC Symbol	MED13L	protein_coding	32	5.2957	-1.1472	5.1286	-3.8233	0.0015252	0.01221	-1.3203
shieldin complex subunit 3 [Source:HGNC Symbol;Acc:HGNC:53826]	ENSG00000253251	112441434	HGNC Symbol	SHLD3	protein_coding	2	3.7345	-1.0662	3.6963	-3.8223	0.0015284	0.012214	-1.3223
coiled-coil domain containing 93 [Source:HGNC Symbol;Acc:HGNC:25611]	ENSG00000125633	54520	HGNC Symbol	CCDC93	protein_coding	9	5.0901	-0.89905	4.989	-3.8218	0.0015299	0.012218	-1.3233
sacsin molecular chaperone [Source:HGNC Symbol;Acc:HGNC:10519]	ENSG00000151835	26278	HGNC Symbol	SACS	protein_coding	5	3.543	0.84417	3.5836	3.821	0.0015323	0.012229	-1.3248
proteasome subunit beta 9 [Source:HGNC Symbol;Acc:HGNC:9546]	ENSG00000240065	5698	HGNC Symbol	PSMB9	protein_coding	5	7.9486	0.75656	8.06	3.8199	0.0015361	0.012251	-1.3272
importin 7 [Source:HGNC Symbol;Acc:HGNC:9852]	ENSG00000205339	10527	HGNC Symbol	IPO7	protein_coding	8	4.9715	0.77816	4.9098	3.8187	0.0015399	0.012273	-1.3297
translocase of inner mitochondrial membrane 13 [Source:HGNC Symbol;Acc:HGNC:11816]	ENSG00000099800	26517	HGNC Symbol	TIMM13	protein_coding	2	5.2756	1.5121	5.4904	3.817	0.0015455	0.012291	-1.3332
SRA stem-loop interacting RNA binding protein [Source:HGNC Symbol;Acc:HGNC:20495]	ENSG00000119705	81892	HGNC Symbol	SLIRP	protein_coding	12	6.366	1.358	6.4292	3.8169	0.0015458	0.012291	-1.3334
MHC class I polypeptide-related sequence A [Source:HGNC Symbol;Acc:HGNC:7090]	ENSG00000204520	100507436	HGNC Symbol	MICA	protein_coding	3	4.6964	0.8672	4.8883	3.8168	0.001546	0.012291	-1.3335
cleavage stimulation factor subunit 3 [Source:HGNC Symbol;Acc:HGNC:2485]	ENSG00000176102	1479	HGNC Symbol	CSTF3	protein_coding	8	4.437	0.73199	4.2467	3.8161	0.0015483	0.012291	-1.335
PBX homeobox 3 [Source:HGNC Symbol;Acc:HGNC:8634]	ENSG00000167081	5090	HGNC Symbol	PBX3	protein_coding	12	3.4436	-1.6279	3.0276	-3.8162	0.0015479	0.012291	-1.3347
tetratricopeptide repeat, ankyrin repeat and coiled-coil containing 2 [Source:HGNC Symbol;Acc:HGNC:30212]	ENSG00000170921	26115	HGNC Symbol	TANC2	protein_coding	10	3.6239	-2.2428	3.1576	-3.8165	0.001547	0.012291	-1.3342
solute carrier family 25 member 39 [Source:HGNC Symbol;Acc:HGNC:24279]	ENSG00000013306	51629	HGNC Symbol	SLC25A39	protein_coding	17	3.7023	0.93142	3.9949	3.8154	0.0015504	0.0123	-1.3363
proteasome 26S subunit, ATPase 3 [Source:HGNC Symbol;Acc:HGNC:9549]	ENSG00000165916	5702	HGNC Symbol	PSMC3	protein_coding	13	7.3913	0.99835	7.5953	3.8145	0.0015534	0.012315	-1.3382
chromosome 6 open reading frame 52 [Source:HGNC Symbol;Acc:HGNC:20881]	ENSG00000137434	347744	HGNC Symbol	C6orf52	protein_coding	6	1.8169	1.369	1.2537	3.8139	0.0015556	0.012324	-1.3396
proteasome 26S subunit, non-ATPase 13 [Source:HGNC Symbol;Acc:HGNC:9558]	ENSG00000185627	5719	HGNC Symbol	PSMD13	protein_coding	15	7.9552	0.84472	7.9889	3.8127	0.0015593	0.012341	-1.3419
SDA1 domain containing 1 [Source:HGNC Symbol;Acc:HGNC:25537]	ENSG00000198301	55153	HGNC Symbol	SDAD1	protein_coding	10	7.1745	0.68469	7.198	3.8126	0.0015597	0.012341	-1.3422
alpha-2-macroglobulin [Source:HGNC Symbol;Acc:HGNC:7]	ENSG00000175899	2	HGNC Symbol	A2M	protein_coding	13	2.8631	-3.6619	2.1202	-3.812	0.0015617	0.012348	-1.3434
DEAD-box helicase 19B [Source:HGNC Symbol;Acc:HGNC:2742]	ENSG00000157349	11269	HGNC Symbol	DDX19B	protein_coding	16	5.1362	-0.64966	5.0623	-3.8114	0.0015636	0.012355	-1.3446
FA complementation group L [Source:HGNC Symbol;Acc:HGNC:20748]	ENSG00000115392	55120	HGNC Symbol	FANCL	protein_coding	10	4.0753	1.0284	3.629	3.8099	0.0015687	0.012387	-1.3478
TNF receptor associated factor 2 [Source:HGNC Symbol;Acc:HGNC:12032]	ENSG00000127191	7186	HGNC Symbol	TRAF2	protein_coding	8	3.462	0.93683	2.9177	3.8095	0.0015699	0.012389	-1.3486
protein phosphatase 2 catalytic subunit alpha [Source:HGNC Symbol;Acc:HGNC:9299]	ENSG00000113575	5515	HGNC Symbol	PPP2CA	protein_coding	6	5.5385	-0.67331	5.5692	-3.8075	0.0015765	0.012424	-1.3526
regulator of G protein signaling 1 [Source:HGNC Symbol;Acc:HGNC:9991]	ENSG00000090104	5996	HGNC Symbol	RGS1	protein_coding	6	7.0913	-1.618	7.6009	-3.8072	0.0015775	0.012424	-1.3533
Z-DNA binding protein 1 [Source:HGNC Symbol;Acc:HGNC:16176]	ENSG00000124256	81030	HGNC Symbol	ZBP1	protein_coding	9	4.107	-3.8181	3.5192	-3.8078	0.0015754	0.012424	-1.352
UDP-galactose-4-epimerase [Source:HGNC Symbol;Acc:HGNC:4116]	ENSG00000117308	2582	HGNC Symbol	GALE	protein_coding	16	4.3737	1.6238	4.4817	3.806	0.0015816	0.012448	-1.3558
cytochrome p450 oxidoreductase [Source:HGNC Symbol;Acc:HGNC:9208]	ENSG00000127948	5447	HGNC Symbol	POR	protein_coding	24	3.8683	1.1188	3.9327	3.805	0.0015848	0.012457	-1.3578
G1 to S phase transition 1 [Source:HGNC Symbol;Acc:HGNC:4621]	ENSG00000103342	2935	HGNC Symbol	GSPT1	protein_coding	10	5.6042	0.70923	5.5255	3.805	0.0015847	0.012457	-1.3578
RuvB like AAA ATPase 1 [Source:HGNC Symbol;Acc:HGNC:10474]	ENSG00000175792	8607	HGNC Symbol	RUVBL1	protein_coding	8	4.9476	1.4295	5.082	3.8041	0.0015879	0.012473	-1.3597
lysine rich nucleolar protein 1 [Source:HGNC Symbol;Acc:HGNC:34404]	ENSG00000103550	400506	HGNC Symbol	KNOP1	protein_coding	5	5.0104	0.95026	4.8642	3.8029	0.0015917	0.012495	-1.3621
transcription factor B1, mitochondrial [Source:HGNC Symbol;Acc:HGNC:17037]	ENSG00000029639	51106	HGNC Symbol	TFB1M	protein_coding	9	5.4024	1.1314	5.1374	3.7999	0.0016017	0.012565	-1.3682
metaxin 2 [Source:HGNC Symbol;Acc:HGNC:7506]	ENSG00000128654	10651	HGNC Symbol	MTX2	protein_coding	5	3.1962	1.0624	3.2871	3.7976	0.0016096	0.012619	-1.373
ubiquitin specific peptidase like 1 [Source:HGNC Symbol;Acc:HGNC:20294]	ENSG00000132952	10208	HGNC Symbol	USPL1	protein_coding	3	5.1655	-1.3736	5.1484	-3.7963	0.0016141	0.012646	-1.3757
chromosome 9 open reading frame 72 [Source:HGNC Symbol;Acc:HGNC:28337]	ENSG00000147894	203228	HGNC Symbol	C9orf72	protein_coding	8	3.9551	-2.9293	3.3691	-3.7948	0.001619	0.012676	-1.3787
vesicle transport through interaction with t-SNAREs 1A [Source:HGNC Symbol;Acc:HGNC:17792]	ENSG00000151532	143187	HGNC Symbol	VTI1A	protein_coding	9	5.9328	-0.80342	6.0494	-3.7937	0.001623	0.012692	-1.3811
TATA-box binding protein associated factor 5 like [Source:HGNC Symbol;Acc:HGNC:17304]	ENSG00000135801	27097	HGNC Symbol	TAF5L	protein_coding	5	2.4763	-1.0565	2.2451	-3.7936	0.0016232	0.012692	-1.3812
ADAM metallopeptidase domain 9 [Source:HGNC Symbol;Acc:HGNC:216]	ENSG00000168615	8754	HGNC Symbol	ADAM9	protein_coding	9	2.3785	-1.1094	2.0074	-3.7924	0.0016274	0.012717	-1.3837
LIM domain binding 2 [Source:HGNC Symbol;Acc:HGNC:6533]	ENSG00000169744	9079	HGNC Symbol	LDB2	protein_coding	16	1.6461	-4.2139	0.25184	-3.7917	0.0016296	0.012726	-1.3851
reactive intermediate imine deaminase A homolog [Source:HGNC Symbol;Acc:HGNC:16897]	ENSG00000132541	10247	HGNC Symbol	RIDA	protein_coding	6	3.9278	1.1539	3.5609	3.7913	0.001631	0.012728	-1.3859
malignant fibrous histiocytoma amplified sequence 1 [Source:HGNC Symbol;Acc:HGNC:16982]	ENSG00000147324	9258	HGNC Symbol	MFHAS1	protein_coding	4	4.7863	1.2837	4.8818	3.7886	0.0016402	0.012786	-1.3914
cyclin Y [Source:HGNC Symbol;Acc:HGNC:23354]	ENSG00000108100	219771	HGNC Symbol	CCNY	protein_coding	10	4.4099	-0.76963	4.377	-3.7885	0.0016405	0.012786	-1.3916
FIC domain containing [Source:HGNC Symbol;Acc:HGNC:18416]	ENSG00000198855	11153	HGNC Symbol	FICD	protein_coding	5	4.3233	1.5363	4.3486	3.7875	0.001644	0.012805	-1.3937
VPS26, retromer complex component B [Source:HGNC Symbol;Acc:HGNC:28119]	ENSG00000151502	112936	HGNC Symbol	VPS26B	protein_coding	7	3.9616	-2.1637	3.7629	-3.7861	0.0016488	0.012834	-1.3965
seryl-tRNA synthetase [Source:HGNC Symbol;Acc:HGNC:10537]	ENSG00000031698	6301	HGNC Symbol	SARS	protein_coding	6	9.2855	1.0091	9.5274	3.7852	0.0016519	0.012849	-1.3984
cysteine rich transmembrane module containing 1 [Source:HGNC Symbol;Acc:HGNC:30239]	ENSG00000120306	84418	HGNC Symbol	CYSTM1	protein_coding	5	4.5605	0.95601	4.0903	3.7847	0.0016536	0.012855	-1.3994
SMAD specific E3 ubiquitin protein ligase 1 [Source:HGNC Symbol;Acc:HGNC:16807]	ENSG00000198742	57154	HGNC Symbol	SMURF1	protein_coding	4	3.4159	-1.1338	3.1948	-3.7833	0.0016588	0.012887	-1.4025
ATP2B1 antisense RNA 1 [Source:HGNC Symbol;Acc:HGNC:27883]	ENSG00000271614	NA	HGNC Symbol	ATP2B1-AS1	lincRNA	1	1.5322	-1.7446	2.0282	-3.7821	0.0016629	0.01291	-1.4049
STEAP family member 1 [Source:HGNC Symbol;Acc:HGNC:11378]	ENSG00000164647	26872	HGNC Symbol	STEAP1	protein_coding	3	2.1529	5.9735	3.4022	3.7815	0.0016648	0.012917	-1.406
mitochondrial ribosomal protein S15 [Source:HGNC Symbol;Acc:HGNC:14504]	ENSG00000116898	64960	HGNC Symbol	MRPS15	protein_coding	4	5.2964	0.84527	5.1934	3.7811	0.0016664	0.012921	-1.407
centrobin, centriole duplication and spindle assembly protein [Source:HGNC Symbol;Acc:HGNC:29616]	ENSG00000170037	116840	HGNC Symbol	CNTROB	protein_coding	15	2.8038	-1.2206	2.5095	-3.7803	0.0016689	0.012932	-1.4084
nucleoside-triphosphatase, cancer-related [Source:HGNC Symbol;Acc:HGNC:28204]	ENSG00000135778	84284	HGNC Symbol	NTPCR	protein_coding	8	5.8626	0.74105	5.785	3.7791	0.0016735	0.012958	-1.4111
small nucleolar RNA, H/ACA box 84 [Source:HGNC Symbol;Acc:HGNC:33615]	ENSG00000239183	NA	HGNC Symbol	SNORA84	snoRNA	1	2.528	0.94221	2.5145	3.7784	0.0016759	0.012969	-1.4125
centrosomal protein 95 [Source:HGNC Symbol;Acc:HGNC:25141]	ENSG00000258890	90799	HGNC Symbol	CEP95	protein_coding	19	5.444	-1.0842	5.3113	-3.7777	0.0016781	0.012969	-1.4138
zinc finger protein 525 [Source:HGNC Symbol;Acc:HGNC:29423]	ENSG00000203326	170958	HGNC Symbol	ZNF525	protein_coding	8	3.7015	-1.2656	3.4031	-3.778	0.0016771	0.012969	-1.4132
mitogen-activated protein kinase kinase kinase 11 [Source:HGNC Symbol;Acc:HGNC:6850]	ENSG00000173327	4296	HGNC Symbol	MAP3K11	protein_coding	13	3.0971	-1.1548	2.7162	-3.7747	0.001689	0.013045	-1.4201
microfibril associated protein 1 [Source:HGNC Symbol;Acc:HGNC:7032]	ENSG00000140259	4236	HGNC Symbol	MFAP1	protein_coding	2	6.3014	0.94607	5.7544	3.7725	0.0016965	0.013092	-1.4245
SH3 domain binding glutamate rich protein like [Source:HGNC Symbol;Acc:HGNC:10823]	ENSG00000131171	6451	HGNC Symbol	SH3BGRL	protein_coding	4	7.3744	-1.5921	7.0826	-3.7721	0.0016981	0.013092	-1.4254
fucosyltransferase 11 [Source:HGNC Symbol;Acc:HGNC:19233]	ENSG00000196968	170384	HGNC Symbol	FUT11	protein_coding	4	5.5514	-1.9846	5.3051	-3.772	0.0016984	0.013092	-1.4256
annexin A11 [Source:HGNC Symbol;Acc:HGNC:535]	ENSG00000122359	311	HGNC Symbol	ANXA11	protein_coding	10	5.2667	-1.2345	5.1109	-3.77	0.0017057	0.013115	-1.4298
von Willebrand factor A domain containing 8 [Source:HGNC Symbol;Acc:HGNC:29071]	ENSG00000102763	23078	HGNC Symbol	VWA8	protein_coding	4	2.8974	-1.2658	2.5789	-3.77	0.0017056	0.013115	-1.4297
Ras related GTP binding B [Source:HGNC Symbol;Acc:HGNC:19901]	ENSG00000083750	10325	HGNC Symbol	RRAGB	protein_coding	6	4.1018	-1.3585	4.0812	-3.77	0.0017055	0.013115	-1.4296
U2 small nuclear RNA auxiliary factor 1 [Source:HGNC Symbol;Acc:HGNC:12453]	ENSG00000160201	7307	HGNC Symbol	U2AF1	protein_coding	12	3.0486	-1.4523	3.1893	-3.7705	0.0017039	0.013115	-1.4287
PGAM family member 5, mitochondrial serine/threonine protein phosphatase [Source:HGNC Symbol;Acc:HGNC:28763]	ENSG00000247077	192111	HGNC Symbol	PGAM5	protein_coding	4	3.5735	0.96338	3.5176	3.7686	0.0017104	0.013132	-1.4325
protein phosphatase 1 regulatory subunit 8 [Source:HGNC Symbol;Acc:HGNC:9296]	ENSG00000117751	5511	HGNC Symbol	PPP1R8	protein_coding	5	6.0195	0.86019	5.8954	3.7681	0.0017123	0.013132	-1.4336
putative homeodomain transcription factor 2 [Source:HGNC Symbol;Acc:HGNC:13411]	ENSG00000006576	57157	HGNC Symbol	PHTF2	protein_coding	12	4.0048	-1.0018	3.6208	-3.7684	0.0017113	0.013132	-1.433
neuromedin U receptor 1 [Source:HGNC Symbol;Acc:HGNC:4518]	ENSG00000171596	10316	HGNC Symbol	NMUR1	protein_coding	1	3.0821	-3.4773	2.6	-3.7689	0.0017096	0.013132	-1.432
large tumor suppressor kinase 1 [Source:HGNC Symbol;Acc:HGNC:6514]	ENSG00000131023	9113	HGNC Symbol	LATS1	protein_coding	7	4.2144	-0.97803	4.2631	-3.767	0.0017162	0.013154	-1.4358
ecdysoneless cell cycle regulator [Source:HGNC Symbol;Acc:HGNC:17029]	ENSG00000122882	11319	HGNC Symbol	ECD	protein_coding	8	6.3771	-0.95776	6.289	-3.7662	0.0017191	0.013167	-1.4374
zinc finger protein 507 [Source:HGNC Symbol;Acc:HGNC:23783]	ENSG00000168813	22847	HGNC Symbol	ZNF507	protein_coding	5	3.7049	-1.1767	3.4933	-3.7626	0.0017321	0.01325	-1.4448
interleukin 23 subunit alpha [Source:HGNC Symbol;Acc:HGNC:15488]	ENSG00000110944	51561	HGNC Symbol	IL23A	protein_coding	3	1.3767	-1.4247	1.2699	-3.7628	0.0017315	0.01325	-1.4444
centromere protein K [Source:HGNC Symbol;Acc:HGNC:29479]	ENSG00000123219	64105	HGNC Symbol	CENPK	protein_coding	17	5.9244	1.3436	5.4453	3.7622	0.0017336	0.013253	-1.4457
lysosomal associated membrane protein 3 [Source:HGNC Symbol;Acc:HGNC:14582]	ENSG00000078081	27074	HGNC Symbol	LAMP3	protein_coding	5	1.9971	1.5653	1.7085	3.7615	0.0017364	0.013266	-1.4472
cytohesin 1 [Source:HGNC Symbol;Acc:HGNC:9501]	ENSG00000108669	9267	HGNC Symbol	CYTH1	protein_coding	17	4.6821	-2.3739	4.2224	-3.761	0.0017383	0.013272	-1.4483
placenta specific 8 [Source:HGNC Symbol;Acc:HGNC:19254]	ENSG00000145287	51316	HGNC Symbol	PLAC8	protein_coding	6	6.9177	-3.4227	6.232	-3.7605	0.0017401	0.013277	-1.4493
glutathione peroxidase 7 [Source:HGNC Symbol;Acc:HGNC:4559]	ENSG00000116157	2882	HGNC Symbol	GPX7	protein_coding	2	4.8867	1.1389	4.9124	3.7597	0.0017427	0.013289	-1.4508
shugoshin 2 [Source:HGNC Symbol;Acc:HGNC:30812]	ENSG00000163535	151246	HGNC Symbol	SGO2	protein_coding	6	4.5043	1.0592	3.9037	3.7591	0.001745	0.013298	-1.4521
spectrin repeat containing nuclear envelope protein 1 [Source:HGNC Symbol;Acc:HGNC:17089]	ENSG00000131018	23345	HGNC Symbol	SYNE1	protein_coding	40	7.1097	-3.2916	6.4267	-3.7585	0.0017473	0.013306	-1.4533
transmembrane protein 214 [Source:HGNC Symbol;Acc:HGNC:25983]	ENSG00000119777	54867	HGNC Symbol	TMEM214	protein_coding	13	5.1139	0.87463	5.3541	3.7572	0.001752	0.013334	-1.4559
nipsnap homolog 2 [Source:HGNC Symbol;Acc:HGNC:4179]	ENSG00000146729	2631	HGNC Symbol	NIPSNAP2	protein_coding	11	3.8877	-1.1053	3.7409	-3.756	0.0017565	0.01336	-1.4585
abhydrolase domain containing 5 [Source:HGNC Symbol;Acc:HGNC:21396]	ENSG00000011198	51099	HGNC Symbol	ABHD5	protein_coding	16	4.1704	1.5488	4.2878	3.7547	0.0017611	0.013387	-1.461
caspase 8 [Source:HGNC Symbol;Acc:HGNC:1509]	ENSG00000064012	841	HGNC Symbol	CASP8	protein_coding	20	8.642	-1.9134	8.1307	-3.7533	0.0017665	0.01341	-1.464
RAB37, member RAS oncogene family [Source:HGNC Symbol;Acc:HGNC:30268]	ENSG00000172794	326624	HGNC Symbol	RAB37	protein_coding	16	4.5483	-3.9951	3.749	-3.7536	0.0017653	0.01341	-1.4634
proteasome subunit beta 6 [Source:HGNC Symbol;Acc:HGNC:9543]	ENSG00000142507	5694	HGNC Symbol	PSMB6	protein_coding	5	8.5412	0.88508	8.8413	3.7526	0.0017689	0.013418	-1.4654
DENN domain containing 4A [Source:HGNC Symbol;Acc:HGNC:24321]	ENSG00000174485	10260	HGNC Symbol	DENND4A	protein_coding	9	5.5756	-1.1523	5.5163	-3.7524	0.0017697	0.013418	-1.4658
abhydrolase domain containing 13 [Source:HGNC Symbol;Acc:HGNC:20293]	ENSG00000139826	84945	HGNC Symbol	ABHD13	protein_coding	1	3.5826	-0.93131	3.51	-3.7519	0.0017717	0.013424	-1.4669
glutamyl-prolyl-tRNA synthetase [Source:HGNC Symbol;Acc:HGNC:3418]	ENSG00000136628	2058	HGNC Symbol	EPRS	protein_coding	6	7.7959	1.4877	7.9528	3.7502	0.0017781	0.013456	-1.4704
protein phosphatase 2 regulatory subunit B'gamma [Source:HGNC Symbol;Acc:HGNC:9311]	ENSG00000078304	5527	HGNC Symbol	PPP2R5C	protein_coding	33	8.6936	-2.3545	8.3634	-3.7503	0.0017775	0.013456	-1.4701
WD repeat domain 77 [Source:HGNC Symbol;Acc:HGNC:29652]	ENSG00000116455	79084	HGNC Symbol	WDR77	protein_coding	4	4.1224	1.2696	4.385	3.7486	0.0017838	0.01349	-1.4736
ELOVL fatty acid elongase 1 [Source:HGNC Symbol;Acc:HGNC:14418]	ENSG00000066322	64834	HGNC Symbol	ELOVL1	protein_coding	16	7.6158	0.66655	7.837	3.7478	0.0017869	0.013495	-1.4752
actin related protein 2/3 complex subunit 2 [Source:HGNC Symbol;Acc:HGNC:705]	ENSG00000163466	10109	HGNC Symbol	ARPC2	protein_coding	18	10.133	-0.5981	10.241	-3.748	0.0017861	0.013495	-1.4748
ubiquitin conjugating enzyme E2 H [Source:HGNC Symbol;Acc:HGNC:12484]	ENSG00000186591	7328	HGNC Symbol	UBE2H	protein_coding	10	4.5253	-1.2884	4.4131	-3.7476	0.0017878	0.013495	-1.4757
Dmx like 1 [Source:HGNC Symbol;Acc:HGNC:2937]	ENSG00000172869	1657	HGNC Symbol	DMXL1	protein_coding	15	5.2037	-0.75217	5.0377	-3.7455	0.0017954	0.013536	-1.4799
OTU deubiquitinase 1 [Source:HGNC Symbol;Acc:HGNC:27346]	ENSG00000165312	220213	HGNC Symbol	OTUD1	protein_coding	1	1.5813	-2.3513	1.3308	-3.7456	0.0017951	0.013536	-1.4798
LIM domain kinase 2 [Source:HGNC Symbol;Acc:HGNC:6614]	ENSG00000182541	3985	HGNC Symbol	LIMK2	protein_coding	9	5.6197	3.0183	6.1254	3.745	0.0017976	0.013543	-1.4811
CREB binding protein [Source:HGNC Symbol;Acc:HGNC:2348]	ENSG00000005339	1387	HGNC Symbol	CREBBP	protein_coding	20	5.5368	-1.3965	5.2887	-3.7447	0.0017987	0.013543	-1.4817
cyclin G2 [Source:HGNC Symbol;Acc:HGNC:1593]	ENSG00000138764	901	HGNC Symbol	CCNG2	protein_coding	7	3.0671	-3.1594	2.022	-3.7435	0.001803	0.013567	-1.484
phospholipase C beta 2 [Source:HGNC Symbol;Acc:HGNC:9055]	ENSG00000137841	5330	HGNC Symbol	PLCB2	protein_coding	15	3.3484	-2.3954	2.8835	-3.7428	0.0018059	0.013581	-1.4856
lysophospholipase 1 [Source:HGNC Symbol;Acc:HGNC:6737]	ENSG00000120992	10434	HGNC Symbol	LYPLA1	protein_coding	15	6.8885	0.97538	6.8507	3.7424	0.0018074	0.013583	-1.4864
TatD DNase domain containing 2 [Source:HGNC Symbol;Acc:HGNC:28988]	ENSG00000157014	9797	HGNC Symbol	TATDN2	protein_coding	4	4.5948	-0.958	4.593	-3.7415	0.0018109	0.013601	-1.4883
fatty acid binding protein 5 [Source:HGNC Symbol;Acc:HGNC:3560]	ENSG00000164687	2171	HGNC Symbol	FABP5	protein_coding	4	5.866	2.9388	5.8576	3.7404	0.0018151	0.013619	-1.4906
single stranded DNA binding protein 3 [Source:HGNC Symbol;Acc:HGNC:15674]	ENSG00000157216	23648	HGNC Symbol	SSBP3	protein_coding	16	4.6007	-1.3085	4.8483	-3.7399	0.0018167	0.013619	-1.4914
basonuclin 2 [Source:HGNC Symbol;Acc:HGNC:30988]	ENSG00000173068	54796	HGNC Symbol	BNC2	protein_coding	14	4.2745	-2.8058	3.7173	-3.7402	0.0018157	0.013619	-1.4909
DnaJ heat shock protein family (Hsp40) member A3 [Source:HGNC Symbol;Acc:HGNC:11808]	ENSG00000103423	9093	HGNC Symbol	DNAJA3	protein_coding	14	4.4251	0.67705	4.0697	3.7391	0.0018201	0.013636	-1.4932
F-box protein 31 [Source:HGNC Symbol;Acc:HGNC:16510]	ENSG00000103264	79791	HGNC Symbol	FBXO31	protein_coding	8	2.7976	-0.95333	2.6503	-3.7367	0.0018289	0.013693	-1.498
chondroitin sulfate synthase 1 [Source:HGNC Symbol;Acc:HGNC:17198]	ENSG00000131873	22856	HGNC Symbol	CHSY1	protein_coding	6	5.5241	1.5054	5.6698	3.7348	0.0018366	0.01372	-1.5021
progesterone receptor membrane component 1 [Source:HGNC Symbol;Acc:HGNC:16090]	ENSG00000101856	10857	HGNC Symbol	PGRMC1	protein_coding	2	2.3101	0.90442	2.126	3.7345	0.0018374	0.01372	-1.5025
TP53RK binding protein [Source:HGNC Symbol;Acc:HGNC:24259]	ENSG00000144034	51002	HGNC Symbol	TPRKB	protein_coding	10	5.4974	0.8385	5.4219	3.7343	0.0018382	0.01372	-1.5029
solute carrier family 9 member A9 [Source:HGNC Symbol;Acc:HGNC:20653]	ENSG00000181804	285195	HGNC Symbol	SLC9A9	protein_coding	5	4.3893	-1.4949	4.1745	-3.7345	0.0018375	0.01372	-1.5026
long intergenic non-protein coding RNA 528 [Source:HGNC Symbol;Acc:HGNC:26875]	ENSG00000269220	NA	HGNC Symbol	LINC00528	lincRNA	1	2.603	-1.9764	2.2348	-3.735	0.0018355	0.01372	-1.5015
motile sperm domain containing 1 [Source:HGNC Symbol;Acc:HGNC:25235]	ENSG00000101928	56180	HGNC Symbol	MOSPD1	protein_coding	7	5.1312	0.80609	5.0574	3.7328	0.0018442	0.013757	-1.5061
nuclear distribution C, dynein complex regulator [Source:HGNC Symbol;Acc:HGNC:8045]	ENSG00000090273	10726	HGNC Symbol	NUDC	protein_coding	4	4.6865	0.98402	4.8672	3.7312	0.0018505	0.01376	-1.5094
MRPL20 antisense RNA 1 [Source:HGNC Symbol;Acc:HGNC:27125]	ENSG00000224870	NA	HGNC Symbol	MRPL20-AS1	processed_transcript	8	3.1589	0.73773	3.3174	3.7311	0.0018506	0.01376	-1.5095
protein phosphatase 3 catalytic subunit gamma [Source:HGNC Symbol;Acc:HGNC:9316]	ENSG00000120910	5533	HGNC Symbol	PPP3CC	protein_coding	8	4.6888	-0.64638	4.6893	-3.731	0.001851	0.01376	-1.5097
ubiquitin specific peptidase 21 [Source:HGNC Symbol;Acc:HGNC:12620]	ENSG00000143258	27005	HGNC Symbol	USP21	protein_coding	10	3.0303	-1.2953	3.2517	-3.7319	0.0018477	0.01376	-1.508
mediator complex subunit 14 [Source:HGNC Symbol;Acc:HGNC:2370]	ENSG00000180182	9282	HGNC Symbol	MED14	protein_coding	9	3.929	-1.3621	3.7543	-3.7309	0.0018516	0.01376	-1.51
tetratricopeptide repeat domain 3 [Source:HGNC Symbol;Acc:HGNC:12393]	ENSG00000182670	7267	HGNC Symbol	TTC3	protein_coding	25	6.238	-1.3753	6.1881	-3.7318	0.0018478	0.01376	-1.508
regulatory associated protein of MTOR complex 1 [Source:HGNC Symbol;Acc:HGNC:30287]	ENSG00000141564	57521	HGNC Symbol	RPTOR	protein_coding	12	1.9811	-1.2652	1.5604	-3.7279	0.0018631	0.013837	-1.5161
SFI1 centrin binding protein [Source:HGNC Symbol;Acc:HGNC:29064]	ENSG00000198089	9814	HGNC Symbol	SFI1	protein_coding	29	4.7417	-1.2786	4.2715	-3.7276	0.0018642	0.013837	-1.5167
actinin alpha 1 [Source:HGNC Symbol;Acc:HGNC:163]	ENSG00000072110	87	HGNC Symbol	ACTN1	protein_coding	21	3.3431	1.6812	3.0804	3.7273	0.0018655	0.013838	-1.5173
dolichyldiphosphatase 1 [Source:HGNC Symbol;Acc:HGNC:29565]	ENSG00000167130	57171	HGNC Symbol	DOLPP1	protein_coding	5	2.3952	1.333	2.4139	3.7253	0.0018735	0.013864	-1.5215
BCL2 related protein A1 [Source:HGNC Symbol;Acc:HGNC:991]	ENSG00000140379	597	HGNC Symbol	BCL2A1	protein_coding	2	5.0545	1.06	5.1083	3.7258	0.0018716	0.013864	-1.5205
GPRIN family member 3 [Source:HGNC Symbol;Acc:HGNC:27733]	ENSG00000185477	285513	HGNC Symbol	GPRIN3	protein_coding	2	4.8261	-1.5217	4.6098	-3.7252	0.0018737	0.013864	-1.5216
vesicle associated membrane protein 1 [Source:HGNC Symbol;Acc:HGNC:12642]	ENSG00000139190	6843	HGNC Symbol	VAMP1	protein_coding	8	3.9568	-2.1893	3.8924	-3.7255	0.0018727	0.013864	-1.5211
BCL2 interacting protein 1 [Source:HGNC Symbol;Acc:HGNC:1082]	ENSG00000113734	662	HGNC Symbol	BNIP1	protein_coding	5	5.5118	-0.7765	5.669	-3.7243	0.0018772	0.013882	-1.5235
suppression of tumorigenicity 7 [Source:HGNC Symbol;Acc:HGNC:11351]	ENSG00000004866	7982	HGNC Symbol	ST7	protein_coding	30	5.5295	1.0052	5.7603	3.7226	0.0018841	0.013924	-1.527
telomeric repeat binding factor 1 [Source:HGNC Symbol;Acc:HGNC:11728]	ENSG00000147601	7013	HGNC Symbol	TERF1	protein_coding	8	5.6014	-0.98579	5.6603	-3.7213	0.0018892	0.013953	-1.5297
solute carrier family 35 member B3 [Source:HGNC Symbol;Acc:HGNC:21601]	ENSG00000124786	51000	HGNC Symbol	SLC35B3	protein_coding	5	4.5899	1.0069	4.1738	3.7202	0.0018934	0.013975	-1.5319
NIPA like domain containing 2 [Source:HGNC Symbol;Acc:HGNC:25854]	ENSG00000104361	79815	HGNC Symbol	NIPAL2	protein_coding	8	2.4223	-2.019	1.6628	-3.7189	0.0018986	0.014005	-1.5345
pre-mRNA processing factor 31 [Source:HGNC Symbol;Acc:HGNC:15446]	ENSG00000105618	26121	HGNC Symbol	PRPF31	protein_coding	9	4.5027	0.78575	4.8307	3.718	0.0019025	0.014025	-1.5365
cell division cycle associated 7 [Source:HGNC Symbol;Acc:HGNC:14628]	ENSG00000144354	83879	HGNC Symbol	CDCA7	protein_coding	8	3.8984	1.4224	3.1422	3.7176	0.0019038	0.014026	-1.5372
fumarate hydratase [Source:HGNC Symbol;Acc:HGNC:3700]	ENSG00000091483	2271	HGNC Symbol	FH	protein_coding	3	5.545	1.204	5.6109	3.7168	0.0019071	0.014034	-1.5389
novel transcript, sense intronic to CEACAM21	ENSG00000268027	NA	Clone-based (Ensembl) gene	AC243960.1	lincRNA	3	6.2273	-2.7625	5.9368	-3.717	0.0019062	0.014034	-1.5385
eukaryotic translation initiation factor 5B [Source:HGNC Symbol;Acc:HGNC:30793]	ENSG00000158417	9669	HGNC Symbol	EIF5B	protein_coding	5	6.8537	0.85069	7.0782	3.7161	0.00191	0.014046	-1.5404
dual specificity phosphatase 16 [Source:HGNC Symbol;Acc:HGNC:17909]	ENSG00000111266	80824	HGNC Symbol	DUSP16	protein_coding	6	2.4729	1.3053	2.5204	3.7157	0.0019114	0.014047	-1.5411
zinc finger and BTB domain containing 26 [Source:HGNC Symbol;Acc:HGNC:23383]	ENSG00000171448	57684	HGNC Symbol	ZBTB26	protein_coding	2	2.4409	-1.1419	2.1342	-3.7134	0.001921	0.01411	-1.546
solute carrier family 27 member 4 [Source:HGNC Symbol;Acc:HGNC:10998]	ENSG00000167114	10999	HGNC Symbol	SLC27A4	protein_coding	2	2.1225	0.92225	1.851	3.7107	0.0019319	0.014181	-1.5515
DEAD-box helicase 24 [Source:HGNC Symbol;Acc:HGNC:13266]	ENSG00000089737	57062	HGNC Symbol	DDX24	protein_coding	11	8.387	-0.9664	8.3117	-3.7097	0.0019358	0.014201	-1.5535
leucyl-tRNA synthetase [Source:HGNC Symbol;Acc:HGNC:6512]	ENSG00000133706	51520	HGNC Symbol	LARS	protein_coding	16	6.9179	1.0364	7.2618	3.7079	0.0019431	0.014246	-1.5572
M-phase phosphoprotein 9 [Source:HGNC Symbol;Acc:HGNC:7215]	ENSG00000051825	10198	HGNC Symbol	MPHOSPH9	protein_coding	24	5.7602	-1.2566	5.4911	-3.7068	0.0019476	0.01427	-1.5594
GTPase, IMAP family member 5 [Source:HGNC Symbol;Acc:HGNC:18005]	ENSG00000196329	55340	HGNC Symbol	GIMAP5	protein_coding	7	8.7236	1.3694	8.0359	3.7064	0.0019493	0.014274	-1.5603
pumilio RNA binding family member 3 [Source:HGNC Symbol;Acc:HGNC:29676]	ENSG00000080608	9933	HGNC Symbol	PUM3	protein_coding	4	6.7013	1.6017	6.9208	3.7056	0.0019524	0.014281	-1.5618
transcription factor 25 [Source:HGNC Symbol;Acc:HGNC:29181]	ENSG00000141002	22980	HGNC Symbol	TCF25	protein_coding	26	5.2703	-0.99292	5.1255	-3.7053	0.0019538	0.014281	-1.5625
RAB guanine nucleotide exchange factor 1 [Source:HGNC Symbol;Acc:HGNC:17676]	ENSG00000154710	27342	HGNC Symbol	RABGEF1	protein_coding	10	2.6429	-1.0636	2.4477	-3.7055	0.0019529	0.014281	-1.5621
SPRY domain containing 3 [Source:HGNC Symbol;Acc:HGNC:25920]	ENSG00000167778	84926	HGNC Symbol	SPRYD3	protein_coding	6	5.9736	1.0003	6.2352	3.7045	0.0019569	0.014294	-1.5641
zinc finger CCCH-type containing 6 [Source:HGNC Symbol;Acc:HGNC:24762]	ENSG00000188177	376940	HGNC Symbol	ZC3H6	protein_coding	4	3.7657	-1.9025	3.2859	-3.7043	0.001958	0.014294	-1.5647
DENN domain containing 4B [Source:HGNC Symbol;Acc:HGNC:29044]	ENSG00000198837	9909	HGNC Symbol	DENND4B	protein_coding	13	4.9329	-0.92936	4.9207	-3.704	0.0019593	0.014295	-1.5653
LPS responsive beige-like anchor protein [Source:HGNC Symbol;Acc:HGNC:1742]	ENSG00000198589	987	HGNC Symbol	LRBA	protein_coding	21	5.1798	-1.5945	4.9385	-3.702	0.0019675	0.014346	-1.5694
protein kinase D2 [Source:HGNC Symbol;Acc:HGNC:17293]	ENSG00000105287	25865	HGNC Symbol	PRKD2	protein_coding	17	3.8566	-1.5575	3.4844	-3.6993	0.0019785	0.014418	-1.5749
mutL homolog 1 [Source:HGNC Symbol;Acc:HGNC:7127]	ENSG00000076242	4292	HGNC Symbol	MLH1	protein_coding	23	6.7195	0.95117	6.7553	3.6986	0.0019816	0.014431	-1.5763
ArfGAP with GTPase domain, ankyrin repeat and PH domain 9 [Source:HGNC Symbol;Acc:HGNC:23463]	ENSG00000204172	642517	HGNC Symbol	AGAP9	protein_coding	1	2.8829	-1.4466	2.419	-3.6974	0.0019864	0.014457	-1.5787
programmed cell death 5 [Source:HGNC Symbol;Acc:HGNC:8764]	ENSG00000105185	9141	HGNC Symbol	PDCD5	protein_coding	8	5.6036	1.3639	5.916	3.696	0.0019924	0.014481	-1.5817
proteasome subunit beta 2 [Source:HGNC Symbol;Acc:HGNC:9539]	ENSG00000126067	5690	HGNC Symbol	PSMB2	protein_coding	3	8.2045	1.246	8.3937	3.6958	0.0019933	0.014481	-1.5821
proteasome 26S subunit, non-ATPase 4 [Source:HGNC Symbol;Acc:HGNC:9561]	ENSG00000159352	5710	HGNC Symbol	PSMD4	protein_coding	12	7.8465	0.69581	7.8931	3.6962	0.0019914	0.014481	-1.5812
chromosome 15 open reading frame 40 [Source:HGNC Symbol;Acc:HGNC:28443]	ENSG00000169609	123207	HGNC Symbol	C15orf40	protein_coding	12	5.963	0.78753	5.8283	3.6933	0.0020034	0.014546	-1.5871
zinc finger protein 254 [Source:HGNC Symbol;Acc:HGNC:13047]	ENSG00000213096	9534	HGNC Symbol	ZNF254	protein_coding	8	4.0872	-1.4557	3.7957	-3.6928	0.0020058	0.014552	-1.5882
arylsulfatase A [Source:HGNC Symbol;Acc:HGNC:713]	ENSG00000100299	410	HGNC Symbol	ARSA	protein_coding	8	1.5399	-1.7201	1.3702	-3.6926	0.0020068	0.014552	-1.5887
myocyte enhancer factor 2C [Source:HGNC Symbol;Acc:HGNC:6996]	ENSG00000081189	4208	HGNC Symbol	MEF2C	protein_coding	56	3.5659	-1.9312	3.3781	-3.6904	0.002016	0.01461	-1.5932
protein phosphatase 1 regulatory subunit 9A [Source:HGNC Symbol;Acc:HGNC:14946]	ENSG00000158528	55607	HGNC Symbol	PPP1R9A	protein_coding	8	4.0786	-1.5485	3.4768	-3.6886	0.0020236	0.014656	-1.5968
nuclear receptor coactivator 1 [Source:HGNC Symbol;Acc:HGNC:7668]	ENSG00000084676	8648	HGNC Symbol	NCOA1	protein_coding	11	6.6525	-1.0683	7.0447	-3.6881	0.0020258	0.014664	-1.5979
huntingtin interacting protein 1 related [Source:HGNC Symbol;Acc:HGNC:18415]	ENSG00000130787	9026	HGNC Symbol	HIP1R	protein_coding	10	2.0141	-1.9312	1.3122	-3.6868	0.0020313	0.014695	-1.6006
vir like m6A methyltransferase associated [Source:HGNC Symbol;Acc:HGNC:24500]	ENSG00000164944	25962	HGNC Symbol	VIRMA	protein_coding	9	5.5658	-1.1242	5.3715	-3.6858	0.0020353	0.014715	-1.6025
NAD synthetase 1 [Source:HGNC Symbol;Acc:HGNC:29832]	ENSG00000172890	55191	HGNC Symbol	NADSYN1	protein_coding	23	5.741	-1.1561	5.5542	-3.6853	0.0020377	0.014723	-1.6036
NIN1 (RPN12) binding protein 1 homolog [Source:HGNC Symbol;Acc:HGNC:29540]	ENSG00000141101	28987	HGNC Symbol	NOB1	protein_coding	6	6.9534	0.96102	6.9695	3.6843	0.0020417	0.014728	-1.6055
tRNA methyltransferase 11 homolog [Source:HGNC Symbol;Acc:HGNC:21080]	ENSG00000066651	60487	HGNC Symbol	TRMT11	protein_coding	12	4.9258	0.82533	4.9032	3.6843	0.002042	0.014728	-1.6057
matrix metallopeptidase 19 [Source:HGNC Symbol;Acc:HGNC:7165]	ENSG00000123342	4327	HGNC Symbol	MMP19	protein_coding	9	2.517	-2.4978	1.7058	-3.6844	0.0020416	0.014728	-1.6055
eukaryotic translation initiation factor 4B [Source:HGNC Symbol;Acc:HGNC:3285]	ENSG00000063046	1975	HGNC Symbol	EIF4B	protein_coding	14	7.8721	-1.153	7.6773	-3.6834	0.0020457	0.014746	-1.6075
DNA polymerase delta 2, accessory subunit [Source:HGNC Symbol;Acc:HGNC:9176]	ENSG00000106628	5425	HGNC Symbol	POLD2	protein_coding	18	5.4123	1.934	5.9322	3.6822	0.0020508	0.014747	-1.6099
thioredoxin related transmembrane protein 1 [Source:HGNC Symbol;Acc:HGNC:15487]	ENSG00000139921	81542	HGNC Symbol	TMX1	protein_coding	3	7.5134	1.1553	7.5367	3.6824	0.0020499	0.014747	-1.6094
zinc finger protein 644 [Source:HGNC Symbol;Acc:HGNC:29222]	ENSG00000122482	84146	HGNC Symbol	ZNF644	protein_coding	12	6.1471	-0.94165	5.8326	-3.6826	0.0020492	0.014747	-1.6092
DnaJ heat shock protein family (Hsp40) member C27 [Source:HGNC Symbol;Acc:HGNC:30290]	ENSG00000115137	51277	HGNC Symbol	DNAJC27	protein_coding	7	2.9681	-1.3072	2.6969	-3.6828	0.0020481	0.014747	-1.6086
formin homology 2 domain containing 1 [Source:HGNC Symbol;Acc:HGNC:17905]	ENSG00000135723	29109	HGNC Symbol	FHOD1	protein_coding	10	3.5322	0.87438	3.6067	3.6805	0.0020582	0.014782	-1.6134
calpain small subunit 1 [Source:HGNC Symbol;Acc:HGNC:1481]	ENSG00000126247	826	HGNC Symbol	CAPNS1	protein_coding	17	6.0956	-0.89669	6.0916	-3.6808	0.002057	0.014782	-1.6129
tumor protein p63 regulated 1 like [Source:HGNC Symbol;Acc:HGNC:27007]	ENSG00000158109	127262	HGNC Symbol	TPRG1L	protein_coding	2	3.5156	-1.7285	3.3362	-3.6794	0.002063	0.014808	-1.6157
zinc finger protein 485 [Source:HGNC Symbol;Acc:HGNC:23440]	ENSG00000198298	220992	HGNC Symbol	ZNF485	protein_coding	4	3.1427	1.3085	2.8779	3.6774	0.0020715	0.014842	-1.6197
zinc finger FYVE-type containing 21 [Source:HGNC Symbol;Acc:HGNC:20760]	ENSG00000100711	79038	HGNC Symbol	ZFYVE21	protein_coding	12	2.5549	1.1246	2.2619	3.6777	0.0020703	0.014842	-1.6192
eukaryotic translation initiation factor 3 subunit F [Source:HGNC Symbol;Acc:HGNC:3275]	ENSG00000175390	8665	HGNC Symbol	EIF3F	protein_coding	9	5.3112	-0.80194	5.2406	-3.6776	0.002071	0.014842	-1.6195
ubiquitin conjugating enzyme E2 S [Source:HGNC Symbol;Acc:HGNC:17895]	ENSG00000108106	27338	HGNC Symbol	UBE2S	protein_coding	4	2.153	-1.1467	1.6854	-3.676	0.0020776	0.014868	-1.6226
protein tyrosine phosphatase, non-receptor type 12 [Source:HGNC Symbol;Acc:HGNC:9645]	ENSG00000127947	5782	HGNC Symbol	PTPN12	protein_coding	16	5.5212	-1.9642	5.3797	-3.676	0.0020776	0.014868	-1.6226
SWI/SNF related, matrix associated, actin dependent regulator of chromatin subfamily c member 1 [Source:HGNC Symbol;Acc:HGNC:11104]	ENSG00000173473	6599	HGNC Symbol	SMARCC1	protein_coding	8	5.29	-0.81293	5.3208	-3.6745	0.0020843	0.014907	-1.6257
proteasome 26S subunit, ATPase 5 [Source:HGNC Symbol;Acc:HGNC:9552]	ENSG00000087191	5705	HGNC Symbol	PSMC5	protein_coding	21	8.4815	0.80257	8.8082	3.6735	0.0020887	0.01493	-1.6278
apolipoprotein B mRNA editing enzyme catalytic subunit 3F [Source:HGNC Symbol;Acc:HGNC:17356]	ENSG00000128394	200316	HGNC Symbol	APOBEC3F	protein_coding	4	5.5906	1.321	5.4172	3.6725	0.002093	0.014952	-1.6298
chaperonin containing TCP1 subunit 4 [Source:HGNC Symbol;Acc:HGNC:1617]	ENSG00000115484	10575	HGNC Symbol	CCT4	protein_coding	4	6.7108	1.2317	6.8708	3.6711	0.0020994	0.014975	-1.6327
SPT5 homolog, DSIF elongation factor subunit [Source:HGNC Symbol;Acc:HGNC:11469]	ENSG00000196235	6829	HGNC Symbol	SUPT5H	protein_coding	20	5.2673	-0.69766	5.0972	-3.6707	0.0021012	0.014975	-1.6336
mitochondrial carrier 1 [Source:HGNC Symbol;Acc:HGNC:17586]	ENSG00000137409	23787	HGNC Symbol	MTCH1	protein_coding	6	4.0372	-0.89334	4.1396	-3.6708	0.0021007	0.014975	-1.6334
CDK5 regulatory subunit associated protein 2 [Source:HGNC Symbol;Acc:HGNC:18672]	ENSG00000136861	55755	HGNC Symbol	CDK5RAP2	protein_coding	19	5.2924	-1.1659	4.9287	-3.6708	0.0021008	0.014975	-1.6334
zinc finger protein 335 [Source:HGNC Symbol;Acc:HGNC:15807]	ENSG00000198026	63925	HGNC Symbol	ZNF335	protein_coding	4	4.4487	-1.1755	4.0549	-3.6689	0.0021089	0.01502	-1.6372
reticulon 4 [Source:HGNC Symbol;Acc:HGNC:14085]	ENSG00000115310	57142	HGNC Symbol	RTN4	protein_coding	15	6.7886	-1.6074	6.4101	-3.668	0.0021129	0.015031	-1.639
dehydrogenase/reductase 1 [Source:HGNC Symbol;Acc:HGNC:16445]	ENSG00000157379	115817	HGNC Symbol	DHRS1	protein_coding	11	4.7521	-2.2823	4.3891	-3.6681	0.0021126	0.015031	-1.6389
transformer 2 beta homolog [Source:HGNC Symbol;Acc:HGNC:10781]	ENSG00000136527	6434	HGNC Symbol	TRA2B	protein_coding	16	7.3021	-0.71796	7.5662	-3.6643	0.0021296	0.015141	-1.6467
ubiquitin interaction motif containing 1 [Source:HGNC Symbol;Acc:HGNC:30298]	ENSG00000087206	51720	HGNC Symbol	UIMC1	protein_coding	14	5.5843	-0.82342	5.4914	-3.6634	0.0021333	0.015158	-1.6484
solute carrier family 2 member 1 [Source:HGNC Symbol;Acc:HGNC:11005]	ENSG00000117394	6513	HGNC Symbol	SLC2A1	protein_coding	9	4.7876	-0.67133	4.6662	-3.663	0.0021354	0.015164	-1.6494
RIC1 homolog, RAB6A GEF complex partner 1 [Source:HGNC Symbol;Acc:HGNC:17686]	ENSG00000107036	57589	HGNC Symbol	RIC1	protein_coding	7	3.5224	-1.012	3.4041	-3.6625	0.0021377	0.015171	-1.6504
ubiquitin specific peptidase 3 [Source:NCBI gene;Acc:9960]	ENSG00000140455	9960	Clone-based (Ensembl) gene	AC007950.1	protein_coding	21	6.3708	-1.268	6.0303	-3.6616	0.0021415	0.015189	-1.6521
glutathione S-transferase kappa 1 [Source:HGNC Symbol;Acc:HGNC:16906]	ENSG00000197448	373156	HGNC Symbol	GSTK1	protein_coding	9	8.004	-1.0378	7.894	-3.6591	0.0021528	0.015261	-1.6573
thioredoxin domain containing 16 [Source:HGNC Symbol;Acc:HGNC:19965]	ENSG00000087301	57544	HGNC Symbol	TXNDC16	protein_coding	4	2.2177	-1.7707	1.6684	-3.6587	0.0021548	0.015266	-1.6582
spectrin beta, non-erythrocytic 1 [Source:HGNC Symbol;Acc:HGNC:11275]	ENSG00000115306	6711	HGNC Symbol	SPTBN1	protein_coding	7	4.9039	-2.5897	4.0718	-3.6582	0.0021569	0.015272	-1.6592
solute carrier family 19 member 2 [Source:HGNC Symbol;Acc:HGNC:10938]	ENSG00000117479	10560	HGNC Symbol	SLC19A2	protein_coding	5	1.9511	-1.0462	1.6728	-3.6572	0.0021614	0.015294	-1.6612
SET domain bifurcated histone lysine methyltransferase 1 [Source:HGNC Symbol;Acc:HGNC:10761]	ENSG00000143379	9869	HGNC Symbol	SETDB1	protein_coding	17	4.3493	-1.0803	4.2077	-3.6565	0.0021648	0.01531	-1.6627
mitochondrial ribosomal protein L17 [Source:HGNC Symbol;Acc:HGNC:14053]	ENSG00000158042	63875	HGNC Symbol	MRPL17	protein_coding	4	5.7187	1.6804	5.7085	3.6552	0.0021708	0.015334	-1.6654
CD99 molecule (Xg blood group) [Source:HGNC Symbol;Acc:HGNC:7082]	ENSG00000002586	4267	HGNC Symbol	CD99	protein_coding	15	7.011	-1.2928	7.1046	-3.6553	0.0021703	0.015334	-1.6652
UDP-GlcNAc:betaGal beta-1,3-N-acetylglucosaminyltransferase 2 [Source:HGNC Symbol;Acc:HGNC:15629]	ENSG00000170340	10678	HGNC Symbol	B3GNT2	protein_coding	2	3.2057	-0.94894	3.2122	-3.6546	0.0021735	0.015335	-1.6666
receptor interacting serine/threonine kinase 1 [Source:HGNC Symbol;Acc:HGNC:10019]	ENSG00000137275	8737	HGNC Symbol	RIPK1	protein_coding	3	4.386	-1.1578	4.1651	-3.6547	0.0021728	0.015335	-1.6663
tribbles pseudokinase 3 [Source:HGNC Symbol;Acc:HGNC:16228]	ENSG00000101255	57761	HGNC Symbol	TRIB3	protein_coding	4	3.0732	1.6299	3.2174	3.6541	0.0021755	0.01534	-1.6675
succinate-CoA ligase GDP-forming beta subunit [Source:HGNC Symbol;Acc:HGNC:11450]	ENSG00000172340	8801	HGNC Symbol	SUCLG2	protein_coding	4	5.0699	-1.4174	4.7554	-3.6538	0.002177	0.015341	-1.6682
LEM domain containing 2 [Source:HGNC Symbol;Acc:HGNC:21244]	ENSG00000161904	221496	HGNC Symbol	LEMD2	protein_coding	14	1.5828	-1.4567	1.2651	-3.6533	0.0021791	0.015347	-1.6691
EF-hand domain containing 1 [Source:HGNC Symbol;Acc:HGNC:16406]	ENSG00000096093	114327	HGNC Symbol	EFHC1	protein_coding	39	3.718	-2.8133	3.1565	-3.6526	0.0021824	0.015352	-1.6706
glutathione S-transferase mu 2 [Source:HGNC Symbol;Acc:HGNC:4634]	ENSG00000213366	2946	HGNC Symbol	GSTM2	protein_coding	15	3.9531	-4.4262	2.8188	-3.6528	0.0021817	0.015352	-1.6703
BMS1, ribosome biogenesis factor [Source:HGNC Symbol;Acc:HGNC:23505]	ENSG00000165733	9790	HGNC Symbol	BMS1	protein_coding	1	6.343	0.87171	6.5095	3.6514	0.0021881	0.015361	-1.6732
dihydrouridine synthase 4 like [Source:HGNC Symbol;Acc:HGNC:21517]	ENSG00000105865	11062	HGNC Symbol	DUS4L	protein_coding	11	2.0505	-0.92035	1.5076	-3.6516	0.0021871	0.015361	-1.6727
lysophosphatidic acid receptor 2 [Source:HGNC Symbol;Acc:HGNC:3168]	ENSG00000064547	9170	HGNC Symbol	LPAR2	protein_coding	9	2.5	-1.4597	2.4422	-3.6512	0.0021888	0.015361	-1.6735
mannosidase beta [Source:HGNC Symbol;Acc:HGNC:6831]	ENSG00000109323	4126	HGNC Symbol	MANBA	protein_coding	18	4.2007	-2.1969	3.7387	-3.6518	0.0021862	0.015361	-1.6723
ATPase family, AAA domain containing 2 [Source:HGNC Symbol;Acc:HGNC:30123]	ENSG00000156802	29028	HGNC Symbol	ATAD2	protein_coding	8	4.7969	-0.94451	4.2868	-3.6507	0.002191	0.015368	-1.6745
basic leucine zipper and W2 domains 2 [Source:HGNC Symbol;Acc:HGNC:18808]	ENSG00000136261	28969	HGNC Symbol	BZW2	protein_coding	14	7.0544	1.649	7.1163	3.6495	0.0021969	0.015388	-1.6771
nuclear FMR1 interacting protein 2 [Source:HGNC Symbol;Acc:HGNC:17634]	ENSG00000108256	57532	HGNC Symbol	NUFIP2	protein_coding	2	5.3832	-0.84452	5.241	-3.6493	0.0021977	0.015388	-1.6774
XPA, DNA damage recognition and repair factor [Source:HGNC Symbol;Acc:HGNC:12814]	ENSG00000136936	7507	HGNC Symbol	XPA	protein_coding	4	2.8087	-1.1083	2.7083	-3.6494	0.0021971	0.015388	-1.6772
TP53 regulating kinase [Source:HGNC Symbol;Acc:HGNC:16197]	ENSG00000172315	112858	HGNC Symbol	TP53RK	protein_coding	2	2.4744	1.055	2.0371	3.6474	0.0022066	0.015392	-1.6814
FAST kinase domains 1 [Source:HGNC Symbol;Acc:HGNC:26150]	ENSG00000138399	79675	HGNC Symbol	FASTKD1	protein_coding	10	4.8469	0.99051	4.6404	3.6484	0.0022018	0.015392	-1.6793
pogo transposable element derived with KRAB domain [Source:HGNC Symbol;Acc:HGNC:18800]	ENSG00000143157	57645	HGNC Symbol	POGK	protein_coding	3	4.8567	0.74021	4.6658	3.647	0.0022084	0.015392	-1.6822
leucine rich repeat containing 57 [Source:HGNC Symbol;Acc:HGNC:26719]	ENSG00000180979	255252	HGNC Symbol	LRRC57	protein_coding	6	5.0846	-0.916	4.7045	-3.6477	0.0022051	0.015392	-1.6807
oxidation resistance 1 [Source:HGNC Symbol;Acc:HGNC:15822]	ENSG00000164830	55074	HGNC Symbol	OXR1	protein_coding	15	4.1837	-1.0628	3.775	-3.6467	0.0022099	0.015392	-1.6828
unc-51 like kinase 3 [Source:HGNC Symbol;Acc:HGNC:19703]	ENSG00000140474	25989	HGNC Symbol	ULK3	protein_coding	24	2.5728	-1.1667	2.3991	-3.6475	0.0022062	0.015392	-1.6812
cysteine rich hydrophobic domain 1 [Source:HGNC Symbol;Acc:HGNC:1934]	ENSG00000204116	53344	HGNC Symbol	CHIC1	protein_coding	4	2.4776	-1.2879	2.3806	-3.6472	0.0022074	0.015392	-1.6817
zinc finger protein 490 [Source:HGNC Symbol;Acc:HGNC:23705]	ENSG00000188033	57474	HGNC Symbol	ZNF490	protein_coding	4	2.3016	-1.4251	1.9213	-3.6483	0.0022024	0.015392	-1.6795
glutathione S-transferase mu 4 [Source:HGNC Symbol;Acc:HGNC:4636]	ENSG00000168765	2948	HGNC Symbol	GSTM4	protein_coding	13	3.4313	-2.9643	2.5953	-3.6468	0.0022093	0.015392	-1.6826
inosine monophosphate dehydrogenase 2 [Source:HGNC Symbol;Acc:HGNC:6053]	ENSG00000178035	3615	HGNC Symbol	IMPDH2	protein_coding	12	7.6106	1.5398	7.8243	3.6461	0.0022125	0.015401	-1.684
MAP3K12 binding inhibitory protein 1 [Source:HGNC Symbol;Acc:HGNC:20427]	ENSG00000151332	51562	HGNC Symbol	MBIP	protein_coding	11	5.2622	-1.0339	4.8843	-3.6453	0.0022162	0.015418	-1.6856
immediate early response 5 [Source:HGNC Symbol;Acc:HGNC:5393]	ENSG00000162783	51278	HGNC Symbol	IER5	protein_coding	1	3.7521	-0.92227	4.0641	-3.6449	0.0022179	0.015421	-1.6864
voltage dependent anion channel 1 [Source:HGNC Symbol;Acc:HGNC:12669]	ENSG00000213585	7416	HGNC Symbol	VDAC1	protein_coding	7	7.6125	1.5639	7.9139	3.644	0.0022221	0.015441	-1.6882
antioxidant 1 copper chaperone [Source:HGNC Symbol;Acc:HGNC:798]	ENSG00000177556	475	HGNC Symbol	ATOX1	protein_coding	7	5.9914	0.66328	6.0538	3.6437	0.0022235	0.015442	-1.6888
HMG-box transcription factor 1 [Source:HGNC Symbol;Acc:HGNC:23200]	ENSG00000105856	26959	HGNC Symbol	HBP1	protein_coding	15	7.1453	-2.0259	6.2137	-3.6434	0.0022251	0.015444	-1.6895
adaptor related protein complex 4 subunit beta 1 [Source:HGNC Symbol;Acc:HGNC:572]	ENSG00000134262	10717	HGNC Symbol	AP4B1	protein_coding	14	6.0989	-1.0112	5.7692	-3.6409	0.0022366	0.015515	-1.6946
Opa interacting protein 5 [Source:HGNC Symbol;Acc:HGNC:20300]	ENSG00000104147	11339	HGNC Symbol	OIP5	protein_coding	2	1.593	1.1619	0.85257	3.6405	0.0022385	0.015519	-1.6954
dedicator of cytokinesis 11 [Source:HGNC Symbol;Acc:HGNC:23483]	ENSG00000147251	139818	HGNC Symbol	DOCK11	protein_coding	4	5.778	-1.8011	5.501	-3.64	0.002241	0.015528	-1.6965
NHP2 ribonucleoprotein [Source:HGNC Symbol;Acc:HGNC:14377]	ENSG00000145912	55651	HGNC Symbol	NHP2	protein_coding	6	4.2966	1.6242	4.7319	3.6392	0.0022447	0.01553	-1.6981
nischarin [Source:HGNC Symbol;Acc:HGNC:18006]	ENSG00000010322	11188	HGNC Symbol	NISCH	protein_coding	14	3.8618	-1.189	3.8716	-3.6393	0.0022442	0.01553	-1.6979
cutA divalent cation tolerance homolog [Source:HGNC Symbol;Acc:HGNC:21101]	ENSG00000112514	51596	HGNC Symbol	CUTA	protein_coding	15	7.0894	-1.4729	6.8956	-3.6391	0.0022452	0.01553	-1.6983
long intergenic non-protein coding RNA 1303 [Source:HGNC Symbol;Acc:HGNC:50470]	ENSG00000250548	NA	HGNC Symbol	LINC01303	lincRNA	2	2.2809	-1.048	2.2063	-3.6386	0.0022475	0.015537	-1.6993
chromosome transmission fidelity factor 8 [Source:HGNC Symbol;Acc:HGNC:24353]	ENSG00000168802	54921	HGNC Symbol	CHTF8	protein_coding	8	3.4035	0.98171	3.1943	3.6372	0.0022545	0.015576	-1.7023
CHM like, Rab escort protein 2 [Source:HGNC Symbol;Acc:HGNC:1941]	ENSG00000203668	1122	HGNC Symbol	CHML	protein_coding	5	1.9881	0.90893	1.9681	3.6351	0.0022645	0.015631	-1.7066
SLU7 homolog, splicing factor [Source:HGNC Symbol;Acc:HGNC:16939]	ENSG00000164609	10569	HGNC Symbol	SLU7	protein_coding	9	7.6101	-1.1237	7.4161	-3.6349	0.002265	0.015631	-1.7069
charged multivesicular body protein 7 [Source:HGNC Symbol;Acc:HGNC:28439]	ENSG00000147457	91782	HGNC Symbol	CHMP7	protein_coding	10	3.7739	1.0291	3.2417	3.6329	0.0022745	0.015681	-1.711
formin binding protein 1 [Source:HGNC Symbol;Acc:HGNC:17069]	ENSG00000187239	23048	HGNC Symbol	FNBP1	protein_coding	9	6.4488	-0.85737	6.4563	-3.6324	0.0022773	0.015681	-1.7122
ring finger and CCCH-type domains 2 [Source:HGNC Symbol;Acc:HGNC:21461]	ENSG00000056586	54542	HGNC Symbol	RC3H2	protein_coding	10	5.2633	-1.0552	5.0063	-3.6323	0.0022774	0.015681	-1.7122
hematopoietic cell signal transducer [Source:HGNC Symbol;Acc:HGNC:16977]	ENSG00000126264	10870	HGNC Symbol	HCST	protein_coding	2	7.7644	-1.5151	7.3497	-3.6328	0.0022752	0.015681	-1.7112
olfactory receptor family 7 subfamily A member 5 [Source:HGNC Symbol;Acc:HGNC:8368]	ENSG00000188269	26659	HGNC Symbol	OR7A5	protein_coding	2	1.7255	1.3672	1.1017	3.6314	0.002282	0.015695	-1.7142
transmembrane protein 68 [Source:HGNC Symbol;Acc:HGNC:26510]	ENSG00000167904	137695	HGNC Symbol	TMEM68	protein_coding	19	4.9188	0.76141	4.8854	3.6314	0.0022821	0.015695	-1.7142
RAB11 binding and LisH domain, coiled-coil and HEAT repeat containing [Source:HGNC Symbol;Acc:HGNC:29289]	ENSG00000134444	57614	HGNC Symbol	RELCH	protein_coding	13	3.7562	-1.3074	3.4641	-3.6308	0.0022849	0.015704	-1.7154
chromosome 2 open reading frame 42 [Source:HGNC Symbol;Acc:HGNC:26056]	ENSG00000115998	54980	HGNC Symbol	C2orf42	protein_coding	14	4.8409	1.2076	4.4791	3.6299	0.002289	0.015724	-1.7172
gem nuclear organelle associated protein 8 [Source:HGNC Symbol;Acc:HGNC:26044]	ENSG00000046647	54960	HGNC Symbol	GEMIN8	protein_coding	5	4.211	0.94195	4.2139	3.6285	0.0022958	0.015741	-1.7201
centromere protein X [Source:HGNC Symbol;Acc:HGNC:11422]	ENSG00000169689	201254	HGNC Symbol	CENPX	protein_coding	11	4.7865	0.89298	4.9809	3.628	0.0022981	0.015741	-1.721
chromosome 19 open reading frame 53 [Source:HGNC Symbol;Acc:HGNC:24991]	ENSG00000104979	28974	HGNC Symbol	C19orf53	protein_coding	6	7.7781	0.78223	7.9588	3.6286	0.0022954	0.015741	-1.7199
cyclin I [Source:HGNC Symbol;Acc:HGNC:1595]	ENSG00000118816	10983	HGNC Symbol	CCNI	protein_coding	9	7.2206	-0.80725	7.3795	-3.6284	0.0022961	0.015741	-1.7202
oxysterol binding protein like 7 [Source:NCBI gene;Acc:114881]	ENSG00000006025	114881	Clone-based (Ensembl) gene	AC003665.1	protein_coding	11	2.2852	-2.6837	1.7962	-3.6283	0.0022967	0.015741	-1.7204
phosphoribosylaminoimidazole carboxylase and phosphoribosylaminoimidazolesuccinocarboxamide synthase [Source:HGNC Symbol;Acc:HGNC:8587]	ENSG00000128050	10606	HGNC Symbol	PAICS	protein_coding	8	6.3961	2.8001	6.5596	3.6254	0.0023109	0.015811	-1.7264
glutaminyl-tRNA synthetase [Source:HGNC Symbol;Acc:HGNC:9751]	ENSG00000172053	5859	HGNC Symbol	QARS	protein_coding	52	7.2851	-0.94287	7.0133	-3.6255	0.0023104	0.015811	-1.7262
thioredoxin [Source:HGNC Symbol;Acc:HGNC:12435]	ENSG00000136810	7295	HGNC Symbol	TXN	protein_coding	3	8.2649	1.8566	8.1395	3.6245	0.0023155	0.015829	-1.7284
NOP56 ribonucleoprotein [Source:HGNC Symbol;Acc:HGNC:15911]	ENSG00000101361	10528	HGNC Symbol	NOP56	protein_coding	21	8.1216	1.395	8.3124	3.624	0.0023174	0.015829	-1.7292
ring finger and SPRY domain containing 1 [Source:HGNC Symbol;Acc:HGNC:29420]	ENSG00000159579	89970	HGNC Symbol	RSPRY1	protein_coding	12	5.7425	0.66114	5.5792	3.6236	0.0023195	0.015829	-1.7301
translocase of inner mitochondrial membrane 22 [Source:HGNC Symbol;Acc:HGNC:17317]	ENSG00000177370	29928	HGNC Symbol	TIMM22	protein_coding	1	5.3959	0.62947	5.4459	3.6235	0.0023201	0.015829	-1.7303
LRR binding FLII interacting protein 1 [Source:HGNC Symbol;Acc:HGNC:6702]	ENSG00000124831	9208	HGNC Symbol	LRRFIP1	protein_coding	15	7.2316	-0.82631	7.1102	-3.6241	0.002317	0.015829	-1.729
PC-esterase domain containing 1A [Source:HGNC Symbol;Acc:HGNC:16212]	ENSG00000132635	64773	HGNC Symbol	PCED1A	protein_coding	6	3.3689	-1.5395	3.2733	-3.6217	0.0023289	0.015879	-1.734
ribophorin I [Source:HGNC Symbol;Acc:HGNC:10381]	ENSG00000163902	6184	HGNC Symbol	RPN1	protein_coding	8	7.3819	1.1055	7.6351	3.6203	0.0023357	0.015917	-1.7369
transmembrane BAX inhibitor motif containing 6 [Source:HGNC Symbol;Acc:HGNC:11723]	ENSG00000139644	7009	HGNC Symbol	TMBIM6	protein_coding	28	11.436	0.86842	11.566	3.619	0.0023424	0.015953	-1.7396
selenoprotein S [Source:HGNC Symbol;Acc:HGNC:30396]	ENSG00000131871	55829	HGNC Symbol	SELENOS	protein_coding	8	6.661	1.6092	6.8951	3.6172	0.0023512	0.015995	-1.7433
rabenosyn, RAB effector [Source:HGNC Symbol;Acc:HGNC:20759]	ENSG00000131381	64145	HGNC Symbol	RBSN	protein_coding	9	3.6448	-1.7223	3.2049	-3.6172	0.002351	0.015995	-1.7432
pleckstrin [Source:HGNC Symbol;Acc:HGNC:9070]	ENSG00000115956	5341	HGNC Symbol	PLEK	protein_coding	2	10.493	2.0133	10.707	3.6154	0.0023601	0.016047	-1.747
nuclear pore complex interacting protein family member B11 [Source:HGNC Symbol;Acc:HGNC:37453]	ENSG00000254206	728888	HGNC Symbol	NPIPB11	protein_coding	2	1.7687	-1.8634	1.7356	-3.6137	0.0023684	0.016085	-1.7504
yippee like 2 [Source:HGNC Symbol;Acc:HGNC:18326]	ENSG00000175155	388403	HGNC Symbol	YPEL2	protein_coding	5	3.0207	-2.9367	2.1801	-3.6138	0.0023678	0.016085	-1.7502
prostaglandin reductase 2 [Source:HGNC Symbol;Acc:HGNC:20149]	ENSG00000140043	145482	HGNC Symbol	PTGR2	protein_coding	7	2.1751	-1.1851	1.7024	-3.612	0.0023767	0.016132	-1.7538
apolipoprotein B mRNA editing enzyme catalytic subunit 3G [Source:HGNC Symbol;Acc:HGNC:17357]	ENSG00000239713	60489	HGNC Symbol	APOBEC3G	protein_coding	7	9.5821	1.3587	9.3712	3.6107	0.0023835	0.01617	-1.7566
general transcription factor IIE subunit 1 [Source:HGNC Symbol;Acc:HGNC:4650]	ENSG00000153767	2960	HGNC Symbol	GTF2E1	protein_coding	5	4.7881	1.0573	4.1768	3.6101	0.0023862	0.016178	-1.7577
acidic nuclear phosphoprotein 32 family member A [Source:HGNC Symbol;Acc:HGNC:13233]	ENSG00000140350	8125	HGNC Symbol	ANP32A	protein_coding	11	5.1395	0.69118	5.2446	3.609	0.0023921	0.016209	-1.7601
tripartite motif containing 39 [Source:HGNC Symbol;Acc:HGNC:10065]	ENSG00000204599	56658	HGNC Symbol	TRIM39	protein_coding	11	3.6078	-1.1187	3.1971	-3.6076	0.0023991	0.016248	-1.763
SECIS binding protein 2 like [Source:HGNC Symbol;Acc:HGNC:28997]	ENSG00000138593	9728	HGNC Symbol	SECISBP2L	protein_coding	11	4.4495	-1.3949	4.3223	-3.6066	0.0024038	0.01627	-1.7649
tubulin beta class I [Source:HGNC Symbol;Acc:HGNC:20778]	ENSG00000196230	203068	HGNC Symbol	TUBB	protein_coding	4	10.296	1.8869	10.259	3.606	0.0024072	0.016275	-1.7663
transmembrane protein 251 [Source:HGNC Symbol;Acc:HGNC:20218]	ENSG00000153485	26175	HGNC Symbol	TMEM251	protein_coding	2	2.3633	1.0343	2.1788	3.6057	0.0024083	0.016275	-1.7667
solute carrier family 4 member 7 [Source:HGNC Symbol;Acc:HGNC:11033]	ENSG00000033867	9497	HGNC Symbol	SLC4A7	protein_coding	18	3.9895	-1.0995	3.9318	-3.6057	0.0024086	0.016275	-1.7668
striatin [Source:HGNC Symbol;Acc:HGNC:11424]	ENSG00000115808	6801	HGNC Symbol	STRN	protein_coding	3	3.28	-1.1579	2.95	-3.6053	0.0024108	0.016281	-1.7677
fragile histidine triad [Source:HGNC Symbol;Acc:HGNC:3701]	ENSG00000189283	2272	HGNC Symbol	FHIT	protein_coding	8	2.0934	-1.8796	1.1516	-3.6049	0.0024125	0.016283	-1.7684
BCAS3, microtubule associated cell migration factor [Source:HGNC Symbol;Acc:HGNC:14347]	ENSG00000141376	54828	HGNC Symbol	BCAS3	protein_coding	34	4.6393	-2.2099	4.1717	-3.6027	0.002424	0.016351	-1.773
multiple inositol-polyphosphate phosphatase 1 [Source:HGNC Symbol;Acc:HGNC:7102]	ENSG00000107789	9562	HGNC Symbol	MINPP1	protein_coding	4	2.1161	1.1836	1.7606	3.6023	0.002426	0.016356	-1.7739
tetratricopeptide repeat domain 4 [Source:HGNC Symbol;Acc:HGNC:12394]	ENSG00000243725	7268	HGNC Symbol	TTC4	protein_coding	4	1.842	1.277	1.6708	3.5987	0.0024441	0.016451	-1.7811
activator of HSP90 ATPase activity 1 [Source:HGNC Symbol;Acc:HGNC:1189]	ENSG00000100591	10598	HGNC Symbol	AHSA1	protein_coding	13	6.0119	0.86472	6.0118	3.5987	0.0024443	0.016451	-1.7812
ninein [Source:HGNC Symbol;Acc:HGNC:14906]	ENSG00000100503	51199	HGNC Symbol	NIN	protein_coding	18	5.4566	-1.2078	5.202	-3.5989	0.0024433	0.016451	-1.7808
DEAD-box helicase 31 [Source:HGNC Symbol;Acc:HGNC:16715]	ENSG00000125485	64794	HGNC Symbol	DDX31	protein_coding	7	4.0567	1.0771	3.915	3.5979	0.0024482	0.016469	-1.7827
pyridine nucleotide-disulphide oxidoreductase domain 2 [Source:HGNC Symbol;Acc:HGNC:23517]	ENSG00000119943	84795	HGNC Symbol	PYROXD2	protein_coding	5	3.4004	-3.5061	1.9098	-3.5976	0.0024498	0.01647	-1.7833
RB binding protein 7, chromatin remodeling factor [Source:HGNC Symbol;Acc:HGNC:9890]	ENSG00000102054	5931	HGNC Symbol	RBBP7	protein_coding	12	5.7744	-0.61389	5.7626	-3.5966	0.002455	0.016496	-1.7854
MAP7 domain containing 3 [Source:HGNC Symbol;Acc:HGNC:25742]	ENSG00000129680	79649	HGNC Symbol	MAP7D3	protein_coding	8	4.2537	0.78701	4.0969	3.5956	0.0024601	0.016521	-1.7875
farnesyl-diphosphate farnesyltransferase 1 [Source:HGNC Symbol;Acc:HGNC:3629]	ENSG00000079459	2222	HGNC Symbol	FDFT1	protein_coding	26	7.8605	0.99117	7.9039	3.5941	0.0024681	0.016556	-1.7906
phosphofructokinase, platelet [Source:HGNC Symbol;Acc:HGNC:8878]	ENSG00000067057	5214	HGNC Symbol	PFKP	protein_coding	12	4.6058	0.84217	4.7271	3.5943	0.0024669	0.016556	-1.7902
zinc finger and BTB domain containing 20 [Source:HGNC Symbol;Acc:HGNC:13503]	ENSG00000181722	26137	HGNC Symbol	ZBTB20	protein_coding	20	3.8356	-2.2102	3.3406	-3.5923	0.0024771	0.016607	-1.7942
SRSF protein kinase 1 [Source:HGNC Symbol;Acc:HGNC:11305]	ENSG00000096063	6732	HGNC Symbol	SRPK1	protein_coding	13	5.734	0.78196	5.7458	3.5914	0.0024818	0.016626	-1.796
DEAH-box helicase 40 [Source:HGNC Symbol;Acc:HGNC:18018]	ENSG00000108406	79665	HGNC Symbol	DHX40	protein_coding	10	4.1458	-1.4095	3.8139	-3.5913	0.0024827	0.016626	-1.7964
SEC31 homolog B, COPII coat complex component [Source:HGNC Symbol;Acc:HGNC:23197]	ENSG00000075826	25956	HGNC Symbol	SEC31B	protein_coding	13	4.0435	-1.7372	3.457	-3.5903	0.0024875	0.016649	-1.7983
zinc finger protein 766 [Source:HGNC Symbol;Acc:HGNC:28063]	ENSG00000196214	90321	HGNC Symbol	ZNF766	protein_coding	9	6.1784	-1.6274	5.9166	-3.5896	0.0024917	0.016664	-1.7999
MIR4435-2 host gene [Source:HGNC Symbol;Acc:HGNC:35163]	ENSG00000172965	NA	HGNC Symbol	MIR4435-2HG	lincRNA	25	4.2103	-1.655	3.7665	-3.5894	0.0024926	0.016664	-1.8002
protein-glucosylgalactosylhydroxylysine glucosidase [Source:HGNC Symbol;Acc:HGNC:26210]	ENSG00000142102	80162	HGNC Symbol	PGGHG	protein_coding	8	2.0635	-3.148	1.5465	-3.5891	0.0024942	0.016666	-1.8009
family with sequence similarity 241 member A [Source:HGNC Symbol;Acc:HGNC:26813]	ENSG00000174749	132720	HGNC Symbol	FAM241A	protein_coding	1	3.6345	1.794	3.5315	3.5883	0.0024983	0.016683	-1.8025
heat shock protein family A (Hsp70) member 8 [Source:HGNC Symbol;Acc:HGNC:5241]	ENSG00000109971	3312	HGNC Symbol	HSPA8	protein_coding	24	11.259	1.3829	11.389	3.5877	0.0025012	0.016693	-1.8036
mitochondrial ribosomal protein S34 [Source:HGNC Symbol;Acc:HGNC:16618]	ENSG00000074071	65993	HGNC Symbol	MRPS34	protein_coding	3	1.9811	0.95383	2.1999	3.5869	0.0025059	0.016706	-1.8054
zinc finger matrin-type 4 [Source:HGNC Symbol;Acc:HGNC:25844]	ENSG00000165061	79698	HGNC Symbol	ZMAT4	protein_coding	9	2.6765	-2.3521	1.8039	-3.5869	0.0025058	0.016706	-1.8054
twisted gastrulation BMP signaling modulator 1 [Source:HGNC Symbol;Acc:HGNC:12429]	ENSG00000128791	57045	HGNC Symbol	TWSG1	protein_coding	3	2.8593	1.7851	3.0515	3.5857	0.0025118	0.016737	-1.8077
G protein subunit alpha i2 [Source:HGNC Symbol;Acc:HGNC:4385]	ENSG00000114353	2771	HGNC Symbol	GNAI2	protein_coding	12	5.6121	-0.9315	5.6796	-3.5853	0.0025138	0.016741	-1.8085
purine nucleoside phosphorylase [Source:HGNC Symbol;Acc:HGNC:7892]	ENSG00000198805	4860	HGNC Symbol	PNP	protein_coding	8	5.6879	0.88436	5.5791	3.5844	0.0025191	0.016757	-1.8105
solute carrier family 25 member 14 [Source:HGNC Symbol;Acc:HGNC:10984]	ENSG00000102078	9016	HGNC Symbol	SLC25A14	protein_coding	15	4.1753	-0.80202	3.9425	-3.5845	0.0025182	0.016757	-1.8102
solute carrier family 37 member 4 [Source:HGNC Symbol;Acc:HGNC:4061]	ENSG00000137700	2542	HGNC Symbol	SLC37A4	protein_coding	21	3.4294	1.1903	3.1811	3.5817	0.0025334	0.016843	-1.8161
interleukin 15 receptor subunit alpha [Source:HGNC Symbol;Acc:HGNC:5978]	ENSG00000134470	3601	HGNC Symbol	IL15RA	protein_coding	22	4.0805	1.7313	4.2654	3.5805	0.0025398	0.016876	-1.8185
bolA family member 3 [Source:HGNC Symbol;Acc:HGNC:24415]	ENSG00000163170	388962	HGNC Symbol	BOLA3	protein_coding	5	4.7663	1.3884	4.7755	3.5781	0.0025523	0.016923	-1.8233
E74 like ETS transcription factor 4 [Source:HGNC Symbol;Acc:HGNC:3319]	ENSG00000102034	2000	HGNC Symbol	ELF4	protein_coding	4	4.4434	-0.83942	4.4563	-3.5782	0.0025518	0.016923	-1.8231
intercellular adhesion molecule 3 [Source:HGNC Symbol;Acc:HGNC:5346]	ENSG00000076662	3385	HGNC Symbol	ICAM3	protein_coding	10	4.4237	-1.6458	3.9587	-3.5786	0.0025496	0.016923	-1.8223
catenin beta interacting protein 1 [Source:HGNC Symbol;Acc:HGNC:16913]	ENSG00000178585	56998	HGNC Symbol	CTNNBIP1	protein_coding	4	1.5715	-2.4651	1.0698	-3.5778	0.0025539	0.016923	-1.8239
ATPase phospholipid transporting 8A1 [Source:HGNC Symbol;Acc:HGNC:13531]	ENSG00000124406	10396	HGNC Symbol	ATP8A1	protein_coding	10	4.4549	-2.4935	4.0429	-3.5778	0.0025539	0.016923	-1.8239
RFT1 homolog [Source:HGNC Symbol;Acc:HGNC:30220]	ENSG00000163933	91869	HGNC Symbol	RFT1	protein_coding	4	3.8517	1.046	3.7779	3.5767	0.0025598	0.016943	-1.8262
zinc finger protein 256 [Source:HGNC Symbol;Acc:HGNC:13049]	ENSG00000152454	10172	HGNC Symbol	ZNF256	protein_coding	2	2.594	-1.3326	2.4659	-3.5768	0.0025596	0.016943	-1.8261
protein disulfide isomerase family A member 5 [Source:HGNC Symbol;Acc:HGNC:24811]	ENSG00000065485	10954	HGNC Symbol	PDIA5	protein_coding	8	2.1593	1.686	1.7611	3.5758	0.0025646	0.016947	-1.828
ribosomal protein L27a [Source:HGNC Symbol;Acc:HGNC:10329]	ENSG00000166441	6157	HGNC Symbol	RPL27A	protein_coding	12	8.6002	-1.001	8.402	-3.5761	0.0025633	0.016947	-1.8275
target of myb1 membrane trafficking protein [Source:HGNC Symbol;Acc:HGNC:11982]	ENSG00000100284	10043	HGNC Symbol	TOM1	protein_coding	19	3.8532	-1.6118	3.4514	-3.5761	0.0025631	0.016947	-1.8274
golgin A8 family member B [Source:HGNC Symbol;Acc:HGNC:31973]	ENSG00000215252	440270	HGNC Symbol	GOLGA8B	protein_coding	11	4.7439	-1.6919	4.6172	-3.5748	0.0025701	0.016974	-1.8301
BTB domain containing 11 [Source:HGNC Symbol;Acc:HGNC:23844]	ENSG00000151136	121551	HGNC Symbol	BTBD11	protein_coding	7	1.8528	-1.4317	1.4544	-3.5731	0.0025795	0.017027	-1.8337
sideroflexin 4 [Source:HGNC Symbol;Acc:HGNC:16088]	ENSG00000183605	119559	HGNC Symbol	SFXN4	protein_coding	8	5.1482	2.2994	5.3362	3.571	0.0025907	0.017028	-1.8379
proteasome activator subunit 2 [Source:HGNC Symbol;Acc:HGNC:9569]	ENSG00000100911	5721	HGNC Symbol	PSME2	protein_coding	18	9.6808	1.3137	10.127	3.571	0.002591	0.017028	-1.838
anti-silencing function 1A histone chaperone [Source:HGNC Symbol;Acc:HGNC:20995]	ENSG00000111875	25842	HGNC Symbol	ASF1A	protein_coding	2	4.6912	1.2746	3.928	3.5717	0.0025869	0.017028	-1.8364
schlafen family member 12 [Source:HGNC Symbol;Acc:HGNC:25500]	ENSG00000172123	55106	HGNC Symbol	SLFN12	protein_coding	8	4.7693	0.83762	4.6775	3.5711	0.0025903	0.017028	-1.8377
magnesium transporter MRS2 [Source:HGNC Symbol;Acc:HGNC:13785]	ENSG00000124532	57380	HGNC Symbol	MRS2	protein_coding	6	4.5437	0.71462	4.5855	3.5716	0.0025874	0.017028	-1.8366
protein phosphatase 1 catalytic subunit gamma [Source:HGNC Symbol;Acc:HGNC:9283]	ENSG00000186298	5501	HGNC Symbol	PPP1CC	protein_coding	11	5.2446	-0.70102	5.0742	-3.5712	0.0025895	0.017028	-1.8374
CAP-Gly domain containing linker protein family member 4 [Source:HGNC Symbol;Acc:HGNC:26108]	ENSG00000115295	79745	HGNC Symbol	CLIP4	protein_coding	12	3.9609	-1.4345	3.4984	-3.5714	0.0025886	0.017028	-1.8371
unc-51 like kinase 4 [Source:HGNC Symbol;Acc:HGNC:15784]	ENSG00000168038	54986	HGNC Symbol	ULK4	protein_coding	12	4.0106	-1.5388	3.6862	-3.5717	0.0025869	0.017028	-1.8364
ADP ribosylation factor like GTPase 3 [Source:HGNC Symbol;Acc:HGNC:694]	ENSG00000138175	403	HGNC Symbol	ARL3	protein_coding	1	4.4643	1.0366	4.227	3.5701	0.0025956	0.017049	-1.8397
chromosome 5 open reading frame 24 [Source:HGNC Symbol;Acc:HGNC:26746]	ENSG00000181904	134553	HGNC Symbol	C5orf24	protein_coding	6	3.5613	-0.92262	3.4936	-3.5685	0.0026044	0.017094	-1.843
cullin 4B [Source:HGNC Symbol;Acc:HGNC:2555]	ENSG00000158290	8450	HGNC Symbol	CUL4B	protein_coding	7	4.7769	-2.1016	4.2177	-3.5683	0.0026054	0.017094	-1.8434
heat shock protein family A (Hsp70) member 1 like [Source:HGNC Symbol;Acc:HGNC:5234]	ENSG00000204390	3305	HGNC Symbol	HSPA1L	protein_coding	1	2.6573	1.2971	2.2968	3.5671	0.0026122	0.017124	-1.8459
A-kinase anchoring protein 7 [Source:HGNC Symbol;Acc:HGNC:377]	ENSG00000118507	9465	HGNC Symbol	AKAP7	protein_coding	9	3.3285	-2.4624	2.5372	-3.567	0.0026127	0.017124	-1.8461
interleukin 18 receptor 1 [Source:HGNC Symbol;Acc:HGNC:5988]	ENSG00000115604	8809	HGNC Symbol	IL18R1	protein_coding	5	6.2049	1.7581	6.4589	3.5654	0.0026215	0.017142	-1.8494
nuclear transport factor 2 [Source:HGNC Symbol;Acc:HGNC:13722]	ENSG00000102898	10204	HGNC Symbol	NUTF2	protein_coding	8	7.9331	1.0067	8.1971	3.5661	0.0026175	0.017142	-1.8479
acidic residue methyltransferase 1 [Source:HGNC Symbol;Acc:HGNC:17872]	ENSG00000146476	79624	HGNC Symbol	ARMT1	protein_coding	4	5.7146	0.91689	5.3474	3.5658	0.0026192	0.017142	-1.8485
DnaJ heat shock protein family (Hsp40) member C2 [Source:HGNC Symbol;Acc:HGNC:13192]	ENSG00000105821	27000	HGNC Symbol	DNAJC2	protein_coding	11	4.7634	-0.66825	4.7844	-3.5652	0.0026227	0.017142	-1.8498
SR-related CTD associated factor 8 [Source:HGNC Symbol;Acc:HGNC:20959]	ENSG00000213079	22828	HGNC Symbol	SCAF8	protein_coding	6	4.1757	-1.0682	4.058	-3.5654	0.0026213	0.017142	-1.8493
nuclear receptor interacting protein 1 [Source:HGNC Symbol;Acc:HGNC:8001]	ENSG00000180530	8204	HGNC Symbol	NRIP1	protein_coding	7	3.88	-0.96836	3.9645	-3.5646	0.002626	0.017154	-1.8511
forkhead box P4 [Source:HGNC Symbol;Acc:HGNC:20842]	ENSG00000137166	116113	HGNC Symbol	FOXP4	protein_coding	6	2.0444	1.1249	2.239	3.5623	0.0026385	0.017207	-1.8557
CD151 molecule (Raph blood group) [Source:HGNC Symbol;Acc:HGNC:1630]	ENSG00000177697	977	HGNC Symbol	CD151	protein_coding	23	3.0991	1.0517	3.1876	3.5626	0.0026367	0.017207	-1.855
cholinergic receptor nicotinic beta 1 subunit [Source:HGNC Symbol;Acc:HGNC:1961]	ENSG00000170175	1140	HGNC Symbol	CHRNB1	protein_coding	8	5.8267	0.77343	5.914	3.5621	0.0026398	0.017207	-1.8562
WD repeat containing planar cell polarity effector [Source:HGNC Symbol;Acc:HGNC:28027]	ENSG00000143951	51057	HGNC Symbol	WDPCP	protein_coding	17	3.9425	-1.3949	3.4287	-3.5621	0.0026399	0.017207	-1.8562
POU class 2 homeobox 1 [Source:HGNC Symbol;Acc:HGNC:9212]	ENSG00000143190	5451	HGNC Symbol	POU2F1	protein_coding	17	5.4167	-1.0938	5.2467	-3.5618	0.0026416	0.017209	-1.8568
DDHD domain containing 2 [Source:HGNC Symbol;Acc:HGNC:29106]	ENSG00000085788	23259	HGNC Symbol	DDHD2	protein_coding	24	4.5454	-1.2704	4.0513	-3.5602	0.0026504	0.017248	-1.8601
chromodomain helicase DNA binding protein 9 [Source:HGNC Symbol;Acc:HGNC:25701]	ENSG00000177200	80205	HGNC Symbol	CHD9	protein_coding	21	6.6094	-1.3841	6.4708	-3.5602	0.0026502	0.017248	-1.86
zinc finger and BTB domain containing 18 [Source:HGNC Symbol;Acc:HGNC:13030]	ENSG00000179456	10472	HGNC Symbol	ZBTB18	protein_coding	2	1.4411	-1.8473	0.9931	-3.5593	0.0026551	0.017269	-1.8618
CTD small phosphatase like 2 [Source:HGNC Symbol;Acc:HGNC:26936]	ENSG00000137770	51496	HGNC Symbol	CTDSPL2	protein_coding	11	6.1135	-1.4067	5.8433	-3.557	0.002668	0.017344	-1.8665
acyl-CoA binding domain containing 3 [Source:HGNC Symbol;Acc:HGNC:15453]	ENSG00000182827	64746	HGNC Symbol	ACBD3	protein_coding	2	3.8303	-0.77423	3.6961	-3.5551	0.0026787	0.017404	-1.8704
SRY-box 4 [Source:HGNC Symbol;Acc:HGNC:11200]	ENSG00000124766	6659	HGNC Symbol	SOX4	protein_coding	1	5.5147	-2.2481	5.268	-3.5543	0.002683	0.017422	-1.872
mediator complex subunit 21 [Source:HGNC Symbol;Acc:HGNC:11473]	ENSG00000152944	9412	HGNC Symbol	MED21	protein_coding	7	5.4715	-0.92553	4.9526	-3.5538	0.0026864	0.017434	-1.8732
methylcrotonoyl-CoA carboxylase 2 [Source:HGNC Symbol;Acc:HGNC:6937]	ENSG00000131844	64087	HGNC Symbol	MCCC2	protein_coding	9	4.4211	0.70506	4.5202	3.5529	0.002691	0.017442	-1.8749
NPR3 like, GATOR1 complex subunit [Source:HGNC Symbol;Acc:HGNC:14124]	ENSG00000103148	8131	HGNC Symbol	NPRL3	protein_coding	14	3.567	-1.3566	3.1986	-3.5528	0.0026918	0.017442	-1.8752
microtubule-actin crosslinking factor 1 [Source:HGNC Symbol;Acc:HGNC:13664]	ENSG00000127603	23499	HGNC Symbol	MACF1	protein_coding	34	7.2997	-1.3601	7.1546	-3.5529	0.0026912	0.017442	-1.8749
cell division cycle associated 8 [Source:HGNC Symbol;Acc:HGNC:14629]	ENSG00000134690	55143	HGNC Symbol	CDCA8	protein_coding	2	5.2279	1.2023	3.9298	3.5514	0.0026997	0.017483	-1.878
cell cycle regulator of NHEJ [Source:HGNC Symbol;Acc:HGNC:22432]	ENSG00000122783	78996	HGNC Symbol	CYREN	protein_coding	14	3.8943	0.58667	3.8213	3.5504	0.0027054	0.017501	-1.8801
golgin A8 family member A [Source:HGNC Symbol;Acc:HGNC:31972]	ENSG00000175265	23015	HGNC Symbol	GOLGA8A	protein_coding	5	4.1629	-1.2079	4.172	-3.5504	0.0027052	0.017501	-1.88
ring finger protein 126 [Source:NCBI gene;Acc:55658]	ENSG00000070423	55658	NCBI gene	RNF126	protein_coding	7	1.4392	-0.93125	1.4555	-3.5484	0.0027169	0.017566	-1.8842
bromodomain adjacent to zinc finger domain 2A [Source:HGNC Symbol;Acc:HGNC:962]	ENSG00000076108	11176	HGNC Symbol	BAZ2A	protein_coding	17	5.748	-1.2334	5.7033	-3.5474	0.0027224	0.017592	-1.8861
succinate dehydrogenase complex assembly factor 3 [Source:HGNC Symbol;Acc:HGNC:21752]	ENSG00000196636	57001	HGNC Symbol	SDHAF3	protein_coding	4	4.7784	1.1273	4.8234	3.5467	0.0027263	0.017608	-1.8876
lymphocyte specific protein 1 [Source:HGNC Symbol;Acc:HGNC:6707]	ENSG00000130592	4046	HGNC Symbol	LSP1	protein_coding	17	5.1309	-2.1006	4.8401	-3.5464	0.0027282	0.01761	-1.8882
consortin, connexin sorting protein [Source:HGNC Symbol;Acc:HGNC:26486]	ENSG00000162852	163882	HGNC Symbol	CNST	protein_coding	4	5.3394	-1.1539	5.1267	-3.5452	0.002735	0.017635	-1.8906
TAR (HIV-1) RNA binding protein 1 [Source:HGNC Symbol;Acc:HGNC:11568]	ENSG00000059588	6894	HGNC Symbol	TARBP1	protein_coding	9	4.1424	-1.4125	3.7473	-3.5454	0.0027341	0.017635	-1.8903
NBPF member 11 [Source:HGNC Symbol;Acc:HGNC:31993]	ENSG00000263956	200030	HGNC Symbol	NBPF11	protein_coding	5	2.9147	-1.4497	2.8455	-3.5441	0.0027415	0.017668	-1.893
mitochondrial ribosomal protein L33 [Source:HGNC Symbol;Acc:HGNC:14487]	ENSG00000243147	9553	HGNC Symbol	MRPL33	protein_coding	6	6.0566	0.75753	6.0763	3.5437	0.0027435	0.017671	-1.8937
ubiquilin 2 [Source:HGNC Symbol;Acc:HGNC:12509]	ENSG00000188021	29978	HGNC Symbol	UBQLN2	protein_coding	1	3.2407	-0.60823	3.5279	-3.5428	0.0027491	0.017688	-1.8957
dymeclin [Source:HGNC Symbol;Acc:HGNC:21317]	ENSG00000141627	54808	HGNC Symbol	DYM	protein_coding	20	4.7336	-0.87464	4.5773	-3.5428	0.002749	0.017688	-1.8956
chromobox 1 [Source:HGNC Symbol;Acc:HGNC:1551]	ENSG00000108468	10951	HGNC Symbol	CBX1	protein_coding	6	3.8416	0.83565	3.8743	3.5425	0.0027507	0.017689	-1.8962
protein O-glucosyltransferase 1 [Source:HGNC Symbol;Acc:HGNC:22954]	ENSG00000163389	56983	HGNC Symbol	POGLUT1	protein_coding	9	6.9729	0.86168	6.8881	3.5413	0.0027577	0.017725	-1.8987
glucosamine-phosphate N-acetyltransferase 1 [Source:HGNC Symbol;Acc:HGNC:19980]	ENSG00000100522	64841	HGNC Symbol	GNPNAT1	protein_coding	6	5.0726	1.6734	5.2594	3.5403	0.0027635	0.017733	-1.9008
ubiquitin conjugating enzyme E2 N [Source:HGNC Symbol;Acc:HGNC:12492]	ENSG00000177889	7334	HGNC Symbol	UBE2N	protein_coding	6	8.7452	1.1005	8.7489	3.5407	0.0027612	0.017733	-1.8999
tyrosyl-tRNA synthetase [Source:HGNC Symbol;Acc:HGNC:12840]	ENSG00000134684	8565	HGNC Symbol	YARS	protein_coding	10	7.5972	1.0793	7.7828	3.5404	0.0027631	0.017733	-1.9006
GPN-loop GTPase 2 [Source:HGNC Symbol;Acc:HGNC:25513]	ENSG00000142751	54707	HGNC Symbol	GPN2	protein_coding	5	3.4441	-0.67611	3.2096	-3.5386	0.0027733	0.017781	-1.9042
amylase, alpha 2B (pancreatic) [Source:HGNC Symbol;Acc:HGNC:478]	ENSG00000240038	280	HGNC Symbol	AMY2B	protein_coding	8	2.6873	-2.0926	2.6435	-3.5385	0.0027739	0.017781	-1.9044
chaperonin containing TCP1 subunit 6A [Source:HGNC Symbol;Acc:HGNC:1620]	ENSG00000146731	908	HGNC Symbol	CCT6A	protein_coding	9	6.8787	1.1828	7.0252	3.5371	0.0027823	0.017787	-1.9074
interferon related developmental regulator 1 [Source:HGNC Symbol;Acc:HGNC:5456]	ENSG00000006652	3475	HGNC Symbol	IFRD1	protein_coding	17	5.0677	-0.94717	5.171	-3.5373	0.0027806	0.017787	-1.9068
propionyl-CoA carboxylase subunit alpha [Source:HGNC Symbol;Acc:HGNC:8653]	ENSG00000175198	5095	HGNC Symbol	PCCA	protein_coding	16	2.9588	-1.5806	2.6596	-3.5378	0.0027781	0.017787	-1.9059
lysine demethylase 7A [Source:HGNC Symbol;Acc:HGNC:22224]	ENSG00000006459	80853	HGNC Symbol	KDM7A	protein_coding	3	3.3456	-1.6213	3.1284	-3.5371	0.0027822	0.017787	-1.9073
calpain 2 [Source:HGNC Symbol;Acc:HGNC:1479]	ENSG00000162909	824	HGNC Symbol	CAPN2	protein_coding	12	6.0814	-1.6925	5.8959	-3.5378	0.0027779	0.017787	-1.9058
glutamic--pyruvic transaminase 2 [Source:HGNC Symbol;Acc:HGNC:18062]	ENSG00000166123	84706	HGNC Symbol	GPT2	protein_coding	5	2.7423	1.402	2.3467	3.5361	0.0027877	0.017812	-1.9092
BUD31 homolog [Source:HGNC Symbol;Acc:HGNC:29629]	ENSG00000106245	8896	HGNC Symbol	BUD31	protein_coding	9	5.8995	-0.57546	5.931	-3.5357	0.0027906	0.017818	-1.9102
pleckstrin homology domain interacting protein [Source:HGNC Symbol;Acc:HGNC:15673]	ENSG00000146247	55023	HGNC Symbol	PHIP	protein_coding	2	6.392	-1.0098	6.4544	-3.5352	0.002793	0.017818	-1.9111
FYN binding protein 1 [Source:HGNC Symbol;Acc:HGNC:4036]	ENSG00000082074	2533	HGNC Symbol	FYB1	protein_coding	15	7.4318	-2.6109	7.0535	-3.5355	0.0027915	0.017818	-1.9106
ABL proto-oncogene 1, non-receptor tyrosine kinase [Source:HGNC Symbol;Acc:HGNC:76]	ENSG00000097007	25	HGNC Symbol	ABL1	protein_coding	3	2.4918	-1.408	2.0729	-3.534	0.0028005	0.017856	-1.9137
coiled-coil domain containing 88C [Source:HGNC Symbol;Acc:HGNC:19967]	ENSG00000015133	440193	HGNC Symbol	CCDC88C	protein_coding	14	4.4922	-1.8334	3.9831	-3.5325	0.0028089	0.0179	-1.9166
DAZ interacting zinc finger protein 3 [Source:HGNC Symbol;Acc:HGNC:30938]	ENSG00000198919	9666	HGNC Symbol	DZIP3	protein_coding	6	4.4768	-2.027	3.8766	-3.5319	0.0028125	0.017913	-1.9178
exportin 5 [Source:HGNC Symbol;Acc:HGNC:17675]	ENSG00000124571	57510	HGNC Symbol	XPO5	protein_coding	12	5.1626	0.80862	5.0115	3.5285	0.0028326	0.018032	-1.9248
homer scaffold protein 1 [Source:HGNC Symbol;Acc:HGNC:17512]	ENSG00000152413	9456	HGNC Symbol	HOMER1	protein_coding	5	2.6944	0.88323	2.474	3.527	0.002842	0.018073	-1.928
HECT and RLD domain containing E3 ubiquitin protein ligase 5 [Source:HGNC Symbol;Acc:HGNC:24368]	ENSG00000138646	51191	HGNC Symbol	HERC5	protein_coding	5	3.3868	-2.2604	2.5418	-3.5271	0.0028413	0.018073	-1.9278
D-2-hydroxyglutarate dehydrogenase [Source:HGNC Symbol;Acc:HGNC:28358]	ENSG00000180902	728294	HGNC Symbol	D2HGDH	protein_coding	16	1.7414	0.93781	1.78	3.5261	0.0028472	0.018096	-1.9298
transmembrane protein 223 [Source:NCBI gene;Acc:79064]	ENSG00000168569	79064	NCBI gene	TMEM223	protein_coding	4	4.1266	0.87715	3.756	3.5247	0.0028556	0.01814	-1.9327
poly(A)-specific ribonuclease [Source:HGNC Symbol;Acc:HGNC:8609]	ENSG00000140694	5073	HGNC Symbol	PARN	protein_coding	32	5.3207	-1.1774	5.0811	-3.5244	0.0028572	0.01814	-1.9332
inner membrane mitochondrial protein [Source:HGNC Symbol;Acc:HGNC:6047]	ENSG00000132305	10989	HGNC Symbol	IMMT	protein_coding	12	7.3972	0.9702	7.3938	3.5237	0.0028616	0.018159	-1.9347
cytokine induced apoptosis inhibitor 1 [Source:HGNC Symbol;Acc:HGNC:28050]	ENSG00000005194	57019	HGNC Symbol	CIAPIN1	protein_coding	15	7.3965	0.77768	7.487	3.5231	0.0028651	0.018171	-1.9359
translocase of inner mitochondrial membrane 8A [Source:HGNC Symbol;Acc:HGNC:11817]	ENSG00000126953	1678	HGNC Symbol	TIMM8A	protein_coding	6	4.1828	1.5214	4.2193	3.5223	0.0028702	0.018194	-1.9376
ribosomal protein S15a [Source:HGNC Symbol;Acc:HGNC:10389]	ENSG00000134419	6210	HGNC Symbol	RPS15A	protein_coding	13	6.8207	-1.0688	6.3137	-3.5218	0.0028733	0.018204	-1.9387
family with sequence similarity 45 member A [Source:HGNC Symbol;Acc:HGNC:31793]	ENSG00000119979	404636	HGNC Symbol	FAM45A	protein_coding	11	6.0801	1.0333	6.0962	3.5213	0.0028758	0.018211	-1.9395
HECT domain E3 ubiquitin protein ligase 1 [Source:HGNC Symbol;Acc:HGNC:20157]	ENSG00000092148	25831	HGNC Symbol	HECTD1	protein_coding	19	5.6711	-1.0567	5.4571	-3.5209	0.0028782	0.018216	-1.9403
minichromosome maintenance 9 homologous recombination repair factor [Source:HGNC Symbol;Acc:HGNC:21484]	ENSG00000111877	254394	HGNC Symbol	MCM9	protein_coding	9	4.1269	-1.2432	3.8104	-3.5196	0.0028863	0.018257	-1.9431
killer cell lectin like receptor C1 [Source:HGNC Symbol;Acc:HGNC:6374]	ENSG00000134545	3821	HGNC Symbol	KLRC1	protein_coding	7	9.0785	1.1469	8.66	3.5187	0.0028915	0.018276	-1.9448
negative regulator of reactive oxygen species [Source:HGNC Symbol;Acc:HGNC:24613]	ENSG00000174004	375387	HGNC Symbol	NRROS	protein_coding	2	1.8931	-1.7783	1.4281	-3.5184	0.0028938	0.018276	-1.9456
centrosomal protein 126 [Source:HGNC Symbol;Acc:HGNC:29264]	ENSG00000110318	57562	HGNC Symbol	CEP126	protein_coding	3	3.3108	-2.0862	2.7276	-3.5185	0.002893	0.018276	-1.9453
zinc finger protein 146 [Source:HGNC Symbol;Acc:HGNC:12931]	ENSG00000167635	7705	HGNC Symbol	ZNF146	protein_coding	5	6.1947	1.5768	6.1525	3.5178	0.0028974	0.018289	-1.9468
microtubule associated protein RP/EB family member 2 [Source:HGNC Symbol;Acc:HGNC:6891]	ENSG00000166974	10982	HGNC Symbol	MAPRE2	protein_coding	13	7.6155	-1.786	7.3681	-3.517	0.002902	0.018309	-1.9484
microcephalin 1 [Source:HGNC Symbol;Acc:HGNC:6954]	ENSG00000147316	79648	HGNC Symbol	MCPH1	protein_coding	7	5.2678	-1.0732	5.2737	-3.5155	0.0029112	0.018357	-1.9514
ataxin 7 like 1 [Source:HGNC Symbol;Acc:HGNC:22210]	ENSG00000146776	222255	HGNC Symbol	ATXN7L1	protein_coding	11	3.903	-2.1875	3.1959	-3.5148	0.0029154	0.018374	-1.9528
mediator complex subunit 18 [Source:HGNC Symbol;Acc:HGNC:25944]	ENSG00000130772	54797	HGNC Symbol	MED18	protein_coding	5	5.2538	1.0221	4.5086	3.5137	0.0029224	0.018406	-1.9552
ATPase phospholipid transporting 11B (putative) [Source:HGNC Symbol;Acc:HGNC:13553]	ENSG00000058063	23200	HGNC Symbol	ATP11B	protein_coding	10	5.2589	-0.96626	5.2582	-3.5135	0.0029237	0.018406	-1.9556
zinc finger protein 407 [Source:HGNC Symbol;Acc:HGNC:19904]	ENSG00000215421	55628	HGNC Symbol	ZNF407	protein_coding	8	3.2208	-1.271	2.8013	-3.5131	0.0029258	0.01841	-1.9563
mitochondrial calcium uniporter regulator 1 [Source:HGNC Symbol;Acc:HGNC:21097]	ENSG00000050393	63933	HGNC Symbol	MCUR1	protein_coding	3	3.23	0.75358	2.8519	3.5126	0.0029288	0.018419	-1.9573
tankyrase [Source:HGNC Symbol;Acc:HGNC:11941]	ENSG00000173273	8658	HGNC Symbol	TNKS	protein_coding	13	4.2117	-1.519	3.6914	-3.5122	0.0029316	0.018428	-1.9582
transforming growth factor beta receptor associated protein 1 [Source:HGNC Symbol;Acc:HGNC:16836]	ENSG00000135966	9392	HGNC Symbol	TGFBRAP1	protein_coding	3	4.651	-0.80204	4.4677	-3.5111	0.0029381	0.018459	-1.9604
mitochondrial transcription termination factor 3 [Source:HGNC Symbol;Acc:HGNC:24258]	ENSG00000156469	51001	HGNC Symbol	MTERF3	protein_coding	5	3.7541	0.78325	3.6578	3.5104	0.0029424	0.01847	-1.9618
ArfGAP with RhoGAP domain, ankyrin repeat and PH domain 2 [Source:HGNC Symbol;Acc:HGNC:16924]	ENSG00000047365	116984	HGNC Symbol	ARAP2	protein_coding	10	6.1217	-1.4279	6.0422	-3.5104	0.0029429	0.01847	-1.962
biorientation of chromosomes in cell division 1 [Source:HGNC Symbol;Acc:HGNC:25114]	ENSG00000145919	91272	HGNC Symbol	BOD1	protein_coding	7	2.407	0.89479	2.2192	3.5094	0.0029491	0.018489	-1.964
UTP3, small subunit processome component [Source:HGNC Symbol;Acc:HGNC:24477]	ENSG00000132467	57050	HGNC Symbol	UTP3	protein_coding	1	4.2705	0.63604	4.4888	3.5096	0.0029479	0.018489	-1.9636
membrane associated ring-CH-type finger 3 [Source:HGNC Symbol;Acc:HGNC:28728]	ENSG00000173926	115123	HGNC Symbol	2020-03-03	protein_coding	5	3.7354	1.4373	3.6609	3.508	0.0029573	0.018529	-1.9667
translocase of inner mitochondrial membrane 50 [Source:HGNC Symbol;Acc:HGNC:23656]	ENSG00000105197	92609	HGNC Symbol	TIMM50	protein_coding	19	4.6181	0.60949	4.5098	3.5078	0.0029586	0.018529	-1.9671
G protein subunit alpha 13 [Source:HGNC Symbol;Acc:HGNC:4381]	ENSG00000120063	10672	HGNC Symbol	GNA13	protein_coding	2	5.7144	-1.3876	5.6447	-3.5073	0.002962	0.018541	-1.9683
WD repeat domain 47 [Source:HGNC Symbol;Acc:HGNC:29141]	ENSG00000085433	22911	HGNC Symbol	WDR47	protein_coding	9	3.3874	-1.356	2.9362	-3.5069	0.0029641	0.018544	-1.9689
neuronal calcium sensor 1 [Source:HGNC Symbol;Acc:HGNC:3953]	ENSG00000107130	23413	HGNC Symbol	NCS1	protein_coding	3	3.1874	1.5645	2.8573	3.5063	0.002968	0.018559	-1.9702
myeloid derived growth factor [Source:HGNC Symbol;Acc:HGNC:16948]	ENSG00000074842	56005	HGNC Symbol	MYDGF	protein_coding	4	3.8421	1.5989	4.5116	3.5053	0.0029742	0.018568	-1.9722
RAS like proto-oncogene B [Source:HGNC Symbol;Acc:HGNC:9840]	ENSG00000144118	5899	HGNC Symbol	RALB	protein_coding	8	5.16	1.1841	5.398	3.5053	0.0029745	0.018568	-1.9723
zinc finger protein 470 [Source:HGNC Symbol;Acc:HGNC:22220]	ENSG00000197016	388566	HGNC Symbol	ZNF470	protein_coding	6	2.3856	1.1587	1.6518	3.5051	0.0029757	0.018568	-1.9727
leucine rich repeats and immunoglobulin like domains 2 [Source:HGNC Symbol;Acc:HGNC:20889]	ENSG00000198799	9860	HGNC Symbol	LRIG2	protein_coding	5	4.4965	-1.4173	4.0419	-3.5054	0.0029739	0.018568	-1.9721
zinc finger protein 202 [Source:HGNC Symbol;Acc:HGNC:12994]	ENSG00000166261	7753	HGNC Symbol	ZNF202	protein_coding	9	3.0018	0.83992	3.0541	3.5044	0.0029797	0.018584	-1.9741
splicing factor 3a subunit 3 [Source:HGNC Symbol;Acc:HGNC:10767]	ENSG00000183431	10946	HGNC Symbol	SF3A3	protein_coding	8	7.9865	0.83342	8.1259	3.5036	0.0029848	0.018606	-1.9757
checkpoint kinase 2 [Source:HGNC Symbol;Acc:HGNC:16627]	ENSG00000183765	11200	HGNC Symbol	CHEK2	protein_coding	28	4.8456	0.98561	4.3781	3.5033	0.0029869	0.018609	-1.9764
DEAH-box helicase 36 [Source:HGNC Symbol;Acc:HGNC:14410]	ENSG00000174953	170506	HGNC Symbol	DHX36	protein_coding	13	5.5554	-0.73175	5.4315	-3.5029	0.0029896	0.018616	-1.9773
nucleolar and coiled-body phosphoprotein 1 [Source:HGNC Symbol;Acc:HGNC:15608]	ENSG00000166197	9221	HGNC Symbol	NOLC1	protein_coding	9	7.3557	1.8266	7.8459	3.502	0.0029953	0.018642	-1.9791
FAD dependent oxidoreductase domain containing 1 [Source:HGNC Symbol;Acc:HGNC:26927]	ENSG00000110074	55572	HGNC Symbol	FOXRED1	protein_coding	18	4.6987	0.90337	4.634	3.5014	0.0029988	0.018654	-1.9803
WW domain containing E3 ubiquitin protein ligase 1 [Source:HGNC Symbol;Acc:HGNC:17004]	ENSG00000123124	11059	HGNC Symbol	WWP1	protein_coding	11	4.5137	-1.2022	4.3518	-3.4999	0.0030081	0.018699	-1.9833
ATP binding cassette subfamily A member 5 [Source:HGNC Symbol;Acc:HGNC:35]	ENSG00000154265	23461	HGNC Symbol	ABCA5	protein_coding	14	4.657	-1.493	4.5208	-3.4998	0.0030091	0.018699	-1.9836
signaling lymphocytic activation molecule family member 1 [Source:HGNC Symbol;Acc:HGNC:10903]	ENSG00000117090	6504	HGNC Symbol	SLAMF1	protein_coding	4	3.0766	4.2873	4.0515	3.499	0.003014	0.01871	-1.9852
F-box protein 6 [Source:HGNC Symbol;Acc:HGNC:13585]	ENSG00000116663	26270	HGNC Symbol	FBXO6	protein_coding	3	5.7877	0.65324	5.8677	3.499	0.0030138	0.01871	-1.9851
NEDD4 binding protein 1 [Source:NCBI gene;Acc:9683]	ENSG00000102921	9683	Clone-based (Ensembl) gene	AC026470.1	protein_coding	6	4.7157	0.78003	4.8825	3.4987	0.0030162	0.018711	-1.9859
Rho GDP dissociation inhibitor beta [Source:HGNC Symbol;Acc:HGNC:679]	ENSG00000111348	397	HGNC Symbol	ARHGDIB	protein_coding	9	11.515	-1.4285	11.135	-3.4985	0.0030173	0.018711	-1.9862
small ubiquitin-like modifier 2 (SUMO2) pseudogene	ENSG00000228532	NA	Clone-based (Ensembl) gene	AC005000.1	processed_pseudogene	1	2.7555	0.73457	2.6877	3.497	0.0030264	0.018748	-1.9892
bridging integrator 2 [Source:HGNC Symbol;Acc:HGNC:1053]	ENSG00000110934	51411	HGNC Symbol	BIN2	protein_coding	11	8.8084	-2.1749	8.664	-3.4973	0.0030248	0.018748	-1.9887
solute carrier family 7 member 5 [Source:HGNC Symbol;Acc:HGNC:11063]	ENSG00000103257	8140	HGNC Symbol	SLC7A5	protein_coding	3	4.0754	2.3195	4.4003	3.4968	0.0030282	0.018749	-1.9897
VPS35, retromer complex component [Source:HGNC Symbol;Acc:HGNC:13487]	ENSG00000069329	55737	HGNC Symbol	VPS35	protein_coding	12	7.6174	0.97313	7.3337	3.4953	0.0030373	0.018773	-1.9927
cyclin dependent kinase 12 [Source:HGNC Symbol;Acc:HGNC:24224]	ENSG00000167258	51755	HGNC Symbol	CDK12	protein_coding	10	4.6745	-0.80508	4.3631	-3.4952	0.0030383	0.018773	-1.993
cytoplasmic linker associated protein 1 [Source:HGNC Symbol;Acc:HGNC:17088]	ENSG00000074054	23332	HGNC Symbol	CLASP1	protein_coding	16	4.9757	-1.499	4.7441	-3.4954	0.0030369	0.018773	-1.9926
novel transcript	ENSG00000223511	NA	Clone-based (Ensembl) gene	AL683807.1	lincRNA	2	2.4697	-2.2671	2.1995	-3.4952	0.003038	0.018773	-1.9929
platelet activating factor receptor [Source:HGNC Symbol;Acc:HGNC:9582]	ENSG00000169403	5724	HGNC Symbol	PTAFR	protein_coding	3	3.4689	1.2895	3.3393	3.4928	0.0030537	0.018858	-1.9979
zinc finger protein 836 [Source:HGNC Symbol;Acc:HGNC:34333]	ENSG00000196267	162962	HGNC Symbol	ZNF836	protein_coding	6	4.2109	-2.0812	3.7281	-3.4922	0.0030577	0.018874	-1.9992
ring finger protein 11 [Source:HGNC Symbol;Acc:HGNC:10056]	ENSG00000123091	26994	HGNC Symbol	RNF11	protein_coding	3	3.7977	-0.83344	4.0909	-3.4913	0.003063	0.018889	-2.0009
B-Raf proto-oncogene, serine/threonine kinase [Source:HGNC Symbol;Acc:HGNC:1097]	ENSG00000157764	673	HGNC Symbol	BRAF	protein_coding	21	3.946	-1.0601	3.7508	-3.491	0.0030649	0.018889	-2.0015
septin 6 [Source:HGNC Symbol;Acc:HGNC:15848]	ENSG00000125354	23157	HGNC Symbol	2020-09-06	protein_coding	9	6.543	-2.4208	5.9817	-3.4911	0.0030644	0.018889	-2.0013
WW domain containing oxidoreductase [Source:HGNC Symbol;Acc:HGNC:12799]	ENSG00000186153	51741	HGNC Symbol	WWOX	protein_coding	18	3.5581	-1.1348	2.997	-3.4906	0.0030675	0.018896	-2.0023
1-aminocyclopropane-1-carboxylate synthase homolog (inactive) [Source:HGNC Symbol;Acc:HGNC:23989]	ENSG00000110455	84680	HGNC Symbol	ACCS	protein_coding	13	2.9202	-2.7815	1.9992	-3.4901	0.0030712	0.018908	-2.0034
golgi SNAP receptor complex member 2 [Source:HGNC Symbol;Acc:HGNC:4431]	ENSG00000108433	9570	HGNC Symbol	GOSR2	protein_coding	47	5.5233	1.0623	5.5529	3.4889	0.0030789	0.018946	-2.0059
leukocyte receptor cluster member 8 [Source:HGNC Symbol;Acc:HGNC:15500]	ENSG00000167615	114823	HGNC Symbol	LENG8	protein_coding	9	3.0878	-1.4293	2.8851	-3.4877	0.0030863	0.018982	-2.0082
ALG5, dolichyl-phosphate beta-glucosyltransferase [Source:HGNC Symbol;Acc:HGNC:20266]	ENSG00000120697	29880	HGNC Symbol	ALG5	protein_coding	5	6.4364	0.88327	6.5225	3.487	0.0030909	0.018996	-2.0097
long intergenic non-protein coding RNA 299 [Source:HGNC Symbol;Acc:HGNC:27940]	ENSG00000236790	NA	HGNC Symbol	LINC00299	lincRNA	4	4.3802	-2.297	4.0374	-3.4869	0.0030918	0.018996	-2.01
SID1 transmembrane family member 1 [Source:HGNC Symbol;Acc:HGNC:25967]	ENSG00000072858	54847	HGNC Symbol	SIDT1	protein_coding	12	4.4759	-1.5693	4.2563	-3.486	0.0030974	0.019021	-2.0117
bromodomain and WD repeat domain containing 3 [Source:HGNC Symbol;Acc:HGNC:17342]	ENSG00000165288	254065	HGNC Symbol	BRWD3	protein_coding	5	3.5854	-1.125	3.5611	-3.4856	0.0030999	0.019026	-2.0125
nucleotide binding oligomerization domain containing 1 [Source:HGNC Symbol;Acc:HGNC:16390]	ENSG00000106100	10392	HGNC Symbol	NOD1	protein_coding	8	3.1177	-1.8001	2.7972	-3.4847	0.0031057	0.019052	-2.0143
itchy E3 ubiquitin protein ligase [Source:HGNC Symbol;Acc:HGNC:13890]	ENSG00000078747	83737	HGNC Symbol	ITCH	protein_coding	7	6.1016	-1.1506	6.0044	-3.4837	0.0031122	0.019082	-2.0164
high mobility group box 3 [Source:HGNC Symbol;Acc:HGNC:5004]	ENSG00000029993	3149	HGNC Symbol	HMGB3	protein_coding	5	4.4026	1.2928	3.624	3.483	0.0031169	0.019083	-2.0178
tyrosyl-DNA phosphodiesterase 1 [Source:HGNC Symbol;Acc:HGNC:18884]	ENSG00000042088	55775	HGNC Symbol	TDP1	protein_coding	17	6.2238	0.78014	6.229	3.483	0.0031171	0.019083	-2.0179
calmodulin 2 [Source:HGNC Symbol;Acc:HGNC:1445]	ENSG00000143933	805	HGNC Symbol	CALM2	protein_coding	9	9.8141	0.63961	9.5907	3.4831	0.0031163	0.019083	-2.0176
WD repeat domain 7 [Source:HGNC Symbol;Acc:HGNC:13490]	ENSG00000091157	23335	HGNC Symbol	WDR7	protein_coding	13	4.64	-1.3883	4.602	-3.4825	0.0031206	0.019095	-2.019
death domain associated protein [Source:HGNC Symbol;Acc:HGNC:2681]	ENSG00000204209	1616	HGNC Symbol	DAXX	protein_coding	11	8.5116	0.82223	8.2867	3.4816	0.0031263	0.01912	-2.0207
zinc finger DHHC-type containing 20 [Source:HGNC Symbol;Acc:HGNC:20749]	ENSG00000180776	253832	HGNC Symbol	ZDHHC20	protein_coding	10	4.694	-1.1694	4.4494	-3.4804	0.0031339	0.019156	-2.0231
DDB1 and CUL4 associated factor 16 [Source:HGNC Symbol;Acc:HGNC:25987]	ENSG00000163257	54876	HGNC Symbol	DCAF16	protein_coding	3	5.1277	-0.86558	5.1264	-3.4785	0.0031467	0.019186	-2.0271
interleukin 2 receptor subunit beta [Source:HGNC Symbol;Acc:HGNC:6009]	ENSG00000100385	3560	HGNC Symbol	IL2RB	protein_coding	7	7.1254	-1.3737	7.1684	-3.4787	0.0031451	0.019186	-2.0266
adenylate cyclase 9 [Source:HGNC Symbol;Acc:HGNC:240]	ENSG00000162104	115	HGNC Symbol	ADCY9	protein_coding	7	2.4014	-1.4177	1.8352	-3.4787	0.0031453	0.019186	-2.0266
vacuolar protein sorting 13 homolog A [Source:HGNC Symbol;Acc:HGNC:1908]	ENSG00000197969	23230	HGNC Symbol	VPS13A	protein_coding	16	4.902	-1.5376	4.6164	-3.4792	0.0031421	0.019186	-2.0256
docking protein 2 [Source:HGNC Symbol;Acc:HGNC:2991]	ENSG00000147443	9046	HGNC Symbol	DOK2	protein_coding	6	4.4586	-1.8171	4.1284	-3.479	0.0031434	0.019186	-2.026
transmembrane protein 217 [Source:HGNC Symbol;Acc:HGNC:21238]	ENSG00000172738	221468	HGNC Symbol	TMEM217	protein_coding	12	2.4498	1.273	1.8036	3.477	0.0031565	0.019231	-2.0301
component of oligomeric golgi complex 2 [Source:HGNC Symbol;Acc:HGNC:6546]	ENSG00000135775	22796	HGNC Symbol	COG2	protein_coding	9	5.855	0.97567	5.6943	3.4766	0.003159	0.019231	-2.0309
meiosis regulator and mRNA stability factor 1 [Source:HGNC Symbol;Acc:HGNC:29562]	ENSG00000166783	9665	HGNC Symbol	MARF1	protein_coding	15	5.0255	-1.8786	4.5748	-3.4766	0.003159	0.019231	-2.0309
elaC ribonuclease Z 1 [Source:HGNC Symbol;Acc:HGNC:14197]	ENSG00000141642	55520	HGNC Symbol	ELAC1	protein_coding	4	3.5886	0.73464	3.0878	3.4761	0.0031628	0.019245	-2.032
phosphodiesterase 4D interacting protein [Source:HGNC Symbol;Acc:HGNC:15580]	ENSG00000178104	9659	HGNC Symbol	PDE4DIP	protein_coding	50	3.9939	1.0294	3.7128	3.4752	0.0031684	0.019259	-2.0337
zinc finger protein 350 [Source:HGNC Symbol;Acc:HGNC:16656]	ENSG00000256683	59348	HGNC Symbol	ZNF350	protein_coding	9	5.9267	-1.5094	5.4233	-3.4753	0.0031682	0.019259	-2.0337
Morf4 family associated protein 1 [Source:HGNC Symbol;Acc:HGNC:24549]	ENSG00000179010	93621	HGNC Symbol	MRFAP1	protein_coding	5	5.374	-0.7613	5.214	-3.4745	0.0031736	0.019281	-2.0353
neuroplastin [Source:HGNC Symbol;Acc:HGNC:17867]	ENSG00000156642	27020	HGNC Symbol	NPTN	protein_coding	10	4.9491	0.86729	5.1799	3.4737	0.0031787	0.019302	-2.0369
proteasome subunit alpha 7 [Source:HGNC Symbol;Acc:HGNC:9536]	ENSG00000101182	5688	HGNC Symbol	PSMA7	protein_coding	6	8.1269	0.92838	8.2979	3.4723	0.0031879	0.01931	-2.0397
histone cluster 1 H4 family member c [Source:HGNC Symbol;Acc:HGNC:4787]	ENSG00000197061	8364	HGNC Symbol	HIST1H4C	protein_coding	1	9.549	-1.0083	8.5057	-3.4725	0.0031863	0.01931	-2.0392
aminomethyltransferase [Source:HGNC Symbol;Acc:HGNC:473]	ENSG00000145020	275	HGNC Symbol	AMT	protein_coding	57	3.2194	-2.7515	2.1664	-3.4729	0.0031839	0.01931	-2.0385
FGR proto-oncogene, Src family tyrosine kinase [Source:HGNC Symbol;Acc:HGNC:3697]	ENSG00000000938	2268	HGNC Symbol	FGR	protein_coding	7	5.7301	-3.025	5.2217	-3.4729	0.0031837	0.01931	-2.0384
coiled-coil domain containing 65 [Source:HGNC Symbol;Acc:HGNC:29937]	ENSG00000139537	85478	HGNC Symbol	CCDC65	protein_coding	5	3.5077	-3.2651	2.7224	-3.4724	0.0031873	0.01931	-2.0395
gem nuclear organelle associated protein 4 [Source:HGNC Symbol;Acc:HGNC:15717]	ENSG00000179409	50628	HGNC Symbol	GEMIN4	protein_coding	7	3.3496	1.0963	3.4019	3.4706	0.003199	0.019367	-2.0431
autophagy related 4A cysteine peptidase [Source:HGNC Symbol;Acc:HGNC:16489]	ENSG00000101844	115201	HGNC Symbol	ATG4A	protein_coding	8	5.6122	0.76959	5.5288	3.4699	0.0032044	0.019373	-2.0447
AVL9 cell migration associated [Source:HGNC Symbol;Acc:HGNC:28994]	ENSG00000105778	23080	HGNC Symbol	AVL9	protein_coding	9	4.133	-0.9511	3.772	-3.47	0.0032035	0.019373	-2.0444
diacylglycerol kinase delta [Source:HGNC Symbol;Acc:HGNC:2851]	ENSG00000077044	8527	HGNC Symbol	DGKD	protein_coding	14	4.1803	-1.3931	4.0601	-3.4698	0.0032049	0.019373	-2.0449
adhesion regulating molecule 1 [Source:HGNC Symbol;Acc:HGNC:15759]	ENSG00000130706	11047	HGNC Symbol	ADRM1	protein_coding	5	4.7901	1.1681	5.0435	3.469	0.0032101	0.019395	-2.0465
huntingtin [Source:HGNC Symbol;Acc:HGNC:4851]	ENSG00000197386	3064	HGNC Symbol	HTT	protein_coding	20	4.5787	-1.3995	4.1746	-3.4685	0.0032136	0.019406	-2.0475
Ras association domain family member 1 [Source:HGNC Symbol;Acc:HGNC:9882]	ENSG00000068028	11186	HGNC Symbol	RASSF1	protein_coding	10	6.0295	-1.642	5.9196	-3.4668	0.0032251	0.019466	-2.051
superoxide dismutase 1 [Source:HGNC Symbol;Acc:HGNC:11179]	ENSG00000142168	6647	HGNC Symbol	SOD1	protein_coding	4	8.1089	0.72006	8.123	3.4663	0.0032283	0.019474	-2.052
sushi domain containing 1 [Source:HGNC Symbol;Acc:HGNC:25413]	ENSG00000106868	64420	HGNC Symbol	SUSD1	protein_coding	10	4.432	-1.0893	4.2665	-3.4657	0.0032322	0.019474	-2.0531
zinc finger protein 217 [Source:HGNC Symbol;Acc:HGNC:13009]	ENSG00000171940	7764	HGNC Symbol	ZNF217	protein_coding	5	3.9961	-1.4648	3.4209	-3.4655	0.0032337	0.019474	-2.0536
zinc finger protein 292 [Source:HGNC Symbol;Acc:HGNC:18410]	ENSG00000188994	23036	HGNC Symbol	ZNF292	protein_coding	9	6.161	-1.4649	5.9077	-3.4654	0.0032346	0.019474	-2.0538
thioredoxin related transmembrane protein 4 [Source:HGNC Symbol;Acc:HGNC:25237]	ENSG00000125827	56255	HGNC Symbol	TMX4	protein_coding	4	5.3916	-1.5157	5.0226	-3.4654	0.0032346	0.019474	-2.0538
chromosome 11 open reading frame 54 [Source:HGNC Symbol;Acc:HGNC:30204]	ENSG00000182919	28970	HGNC Symbol	C11orf54	protein_coding	15	5.1045	1.0392	4.8088	3.4644	0.0032416	0.019487	-2.0559
karyopherin subunit alpha 5 [Source:HGNC Symbol;Acc:HGNC:6398]	ENSG00000196911	3841	HGNC Symbol	KPNA5	protein_coding	3	4.1771	-1.4594	3.9017	-3.4644	0.0032415	0.019487	-2.0559
chromosome 6 open reading frame 226 [Source:HGNC Symbol;Acc:HGNC:34431]	ENSG00000221821	441150	HGNC Symbol	C6orf226	protein_coding	1	1.4367	-1.544	1.2745	-3.4648	0.0032389	0.019487	-2.0551
Myb like, SWIRM and MPN domains 1 [Source:HGNC Symbol;Acc:HGNC:29401]	ENSG00000162601	114803	HGNC Symbol	MYSM1	protein_coding	8	4.7336	-1.1866	4.6846	-3.4625	0.003254	0.019552	-2.0597
cereblon [Source:HGNC Symbol;Acc:HGNC:30185]	ENSG00000113851	51185	HGNC Symbol	CRBN	protein_coding	15	8.59	-1.5304	8.1907	-3.4623	0.0032559	0.019553	-2.0602
tyrosine 3-monooxygenase/tryptophan 5-monooxygenase activation protein epsilon [Source:HGNC Symbol;Acc:HGNC:12851]	ENSG00000108953	7531	HGNC Symbol	YWHAE	protein_coding	13	8.4755	1.4767	8.3491	3.4614	0.0032617	0.01956	-2.062
tRNA methyltransferase 1 [Source:HGNC Symbol;Acc:HGNC:25980]	ENSG00000104907	55621	HGNC Symbol	TRMT1	protein_coding	23	4.3552	0.85839	4.4589	3.4616	0.0032602	0.01956	-2.0615
SSX family member 2 interacting protein [Source:HGNC Symbol;Acc:HGNC:16509]	ENSG00000117155	117178	HGNC Symbol	SSX2IP	protein_coding	10	3.8062	-2.0343	3.223	-3.4614	0.0032618	0.01956	-2.062
[truncated: 1,306 more rows]
