# Supplementary material for: A Fusion Protein Complex that Combines IL-12, IL-15, and IL-18 Signaling to Induce Memory-Like NK Cells for Cancer Immunotherapy
Source: Oxford University Press journal article supplement (doi:10.1158/2326-6066.cir-20-1002), 2021-07-09
Supplement: 23266066cir201002-sup-256646_3_supp_7124635_qvl67p.xlsx [file 23266066cir201002-sup-256646_3_supp_7124635_qvl67p.xlsx]

## Sheet: D6 LD vs 121518
Description	Ensemble Gene ID	Entrezgene	External Gene Source	Gene Name	Gene Biotype	Transcript Count	Mean	logFC	Average Expression	t	P. Value	Adj. P. Value	B
C-X-C motif chemokine receptor 6 [Source:HGNC Symbol;Acc:HGNC:16647]	ENSG00000172215	10663	HGNC Symbol	CXCR6	protein_coding	4	5.8075	2.0221	7.3848	6.0493	0.0006912	0.99997	-4.4886
C-C motif chemokine receptor 5 (gene/pseudogene) [Source:HGNC Symbol;Acc:HGNC:1606]	ENSG00000160791	1234	HGNC Symbol	CCR5	protein_coding	2	4.0939	1.9795	3.832	3.1955	0.016815	0.99997	-4.5245
metallothionein 1E [Source:HGNC Symbol;Acc:HGNC:7397]	ENSG00000169715	4493	HGNC Symbol	MT1E	protein_coding	3	3.0803	1.5191	3.9737	2.4421	0.047323	0.99997	-4.5443
granzyme H [Source:HGNC Symbol;Acc:HGNC:4710]	ENSG00000100450	2999	HGNC Symbol	GZMH	protein_coding	3	9.473	1.403	8.6296	3.4057	0.012765	0.99997	-4.52
regulator of G protein signaling 1 [Source:HGNC Symbol;Acc:HGNC:9991]	ENSG00000090104	5996	HGNC Symbol	RGS1	protein_coding	6	7.0913	1.3855	6.594	3.1506	0.017849	0.99997	-4.5255
C-C motif chemokine ligand 5 [Source:HGNC Symbol;Acc:HGNC:10632]	ENSG00000271503	6352	HGNC Symbol	CCL5	protein_coding	4	11.807	1.3033	12.29	3.58	0.010209	0.99997	-4.5166
SAM domain, SH3 domain and nuclear localization signals 1 [Source:HGNC Symbol;Acc:HGNC:10528]	ENSG00000155307	64092	HGNC Symbol	SAMSN1	protein_coding	12	8.523	1.3028	8.4817	2.9395	0.023718	0.99997	-4.5305
interferon gamma [Source:HGNC Symbol;Acc:HGNC:5438]	ENSG00000111537	3458	HGNC Symbol	IFNG	protein_coding	1	9.9713	1.203	6.0212	2.7922	0.02902	0.99997	-4.5343
phosphodiesterase 4B [Source:HGNC Symbol;Acc:HGNC:8781]	ENSG00000184588	5142	HGNC Symbol	PDE4B	protein_coding	18	5.8588	1.1558	5.4856	2.838	0.027248	0.99997	-4.5331
family with sequence similarity 107 member B [Source:HGNC Symbol;Acc:HGNC:23726]	ENSG00000065809	83641	HGNC Symbol	FAM107B	protein_coding	29	7.6302	1.1535	7.4323	3.0016	0.021802	0.99997	-4.529
ectonucleoside triphosphate diphosphohydrolase 1 [Source:HGNC Symbol;Acc:HGNC:3363]	ENSG00000138185	953	HGNC Symbol	ENTPD1	protein_coding	13	5.951	1.1243	6.8513	2.4052	0.049866	0.99997	-4.5454
Fas cell surface death receptor [Source:HGNC Symbol;Acc:HGNC:11920]	ENSG00000026103	355	HGNC Symbol	FAS	protein_coding	21	6.0061	1.0678	5.6692	2.6297	0.036362	0.99997	-4.5388
P2Y receptor family member 10 [Source:HGNC Symbol;Acc:HGNC:19906]	ENSG00000078589	27334	HGNC Symbol	P2RY10	protein_coding	4	4.0413	1.0527	5.2384	2.9986	0.021891	0.99997	-4.5291
solute carrier family 9 member A9 [Source:HGNC Symbol;Acc:HGNC:20653]	ENSG00000181804	285195	HGNC Symbol	SLC9A9	protein_coding	5	4.3893	1.0306	4.5821	3.1342	0.018243	0.99997	-4.5259
death domain containing 1 [Source:HGNC Symbol;Acc:HGNC:37261]	ENSG00000197057	401124	HGNC Symbol	DTHD1	protein_coding	6	4.339	0.9812	4.7088	2.9341	0.023892	0.99997	-4.5307
N-acylsphingosine amidohydrolase 2B [Source:HGNC Symbol;Acc:HGNC:23456]	ENSG00000204147	653308	HGNC Symbol	ASAH2B	protein_coding	7	1.5333	0.92848	1.7108	2.4052	0.049865	0.99997	-4.5454
DNA cross-link repair 1A [Source:HGNC Symbol;Acc:HGNC:17660]	ENSG00000198924	9937	HGNC Symbol	DCLRE1A	protein_coding	3	3.5661	0.89467	4.0345	2.6807	0.033863	0.99997	-4.5373
thymocyte selection associated high mobility group box [Source:HGNC Symbol;Acc:HGNC:18988]	ENSG00000198846	9760	HGNC Symbol	TOX	protein_coding	1	7.8089	0.87273	7.4826	2.5118	0.042893	0.99997	-4.5422
FKBP prolyl isomerase 14 [Source:HGNC Symbol;Acc:HGNC:18625]	ENSG00000106080	55033	HGNC Symbol	FKBP14	protein_coding	4	3.16	-0.8115	2.4793	-2.4846	0.044573	0.99997	-4.543
mitochondrial ribosomal protein S2 [Source:HGNC Symbol;Acc:HGNC:14495]	ENSG00000122140	51116	HGNC Symbol	MRPS2	protein_coding	8	2.6732	-0.93817	2.3098	-2.4574	0.046316	0.99997	-4.5438
Fas activated serine/threonine kinase [Source:HGNC Symbol;Acc:HGNC:24676]	ENSG00000164896	10922	HGNC Symbol	FASTK	protein_coding	17	1.9977	-1.1266	1.5121	-3.2284	0.016098	0.99997	-4.5237
transcription elongation factor A like 9 [Source:HGNC Symbol;Acc:HGNC:30084]	ENSG00000185222	51186	HGNC Symbol	TCEAL9	protein_coding	3	1.5381	-1.1549	2.9137	-2.4065	0.049772	0.99997	-4.5454
synaptophysin like 1 [Source:HGNC Symbol;Acc:HGNC:11507]	ENSG00000008282	6856	HGNC Symbol	SYPL1	protein_coding	7	5.8739	-1.1723	6.5222	-2.5757	0.039214	0.99997	-4.5403
Scm polycomb group protein like 1 [Source:HGNC Symbol;Acc:HGNC:10580]	ENSG00000047634	6322	HGNC Symbol	SCML1	protein_coding	7	2.0766	-1.2305	2.6661	-2.5478	0.040779	0.99997	-4.5411
regulator of G protein signaling 16 [Source:HGNC Symbol;Acc:HGNC:9997]	ENSG00000143333	6004	HGNC Symbol	RGS16	protein_coding	1	4.0868	-1.2654	2.6774	-3.2296	0.016074	0.99997	-4.5237
C-C motif chemokine receptor 7 [Source:HGNC Symbol;Acc:HGNC:1608]	ENSG00000126353	1236	HGNC Symbol	CCR7	protein_coding	3	6.5331	-1.6241	5.9109	-2.7723	0.029828	0.99997	-4.5348

## Sheet: D6 LD vs HCW9201
Description	Ensemble Gene ID	Entrezgene	External Gene Source	Gene Name	Gene Biotype	Transcript Count	Mean	logFC	Average Expression	t	P. Value	Adj. P. Value	B
C-C motif chemokine receptor 5 (gene/pseudogene) [Source:HGNC Symbol;Acc:HGNC:1606]	ENSG00000160791	1234	HGNC Symbol	CCR5	protein_coding	2	4.0939	2.4497	4.0672	4.0802	0.0047811	0.99993	-4.5107
granzyme K [Source:HGNC Symbol;Acc:HGNC:4711]	ENSG00000113088	3003	HGNC Symbol	GZMK	protein_coding	2	6.1815	2.1018	8.1034	3.2086	0.015075	0.99993	-4.5267
metallothionein 1E [Source:HGNC Symbol;Acc:HGNC:7397]	ENSG00000169715	4493	HGNC Symbol	MT1E	protein_coding	3	3.0803	1.8891	4.1587	3.3592	0.012264	0.99993	-4.5235
purinergic receptor P2X 5 [Source:HGNC Symbol;Acc:HGNC:8536]	ENSG00000083454	5026	HGNC Symbol	P2RX5	protein_coding	11	5.1639	1.8731	3.7979	2.701	0.030865	0.99993	-4.5391
C-X-C motif chemokine receptor 6 [Source:HGNC Symbol;Acc:HGNC:16647]	ENSG00000172215	10663	HGNC Symbol	CXCR6	protein_coding	4	5.8075	1.7473	7.2474	4.403	0.003216	0.99993	-4.5062
protein phosphatase 1 regulatory subunit 37 [Source:HGNC Symbol;Acc:HGNC:27607]	ENSG00000104866	284352	HGNC Symbol	PPP1R37	protein_coding	9	1.6455	1.6943	2.6521	2.4038	0.047524	0.99993	-4.5477
novel transcript	ENSG00000232611	NA	Clone-based (Ensembl) gene	AL683813.1	lincRNA	1	1.7199	1.6503	2.6956	2.5658	0.037525	0.99993	-4.5429
selectin L [Source:HGNC Symbol;Acc:HGNC:10720]	ENSG00000188404	6402	HGNC Symbol	SELL	protein_coding	7	8.8052	1.4926	9.2835	3.4591	0.010714	0.99993	-4.5214
plectin [Source:HGNC Symbol;Acc:HGNC:9069]	ENSG00000178209	5339	HGNC Symbol	PLEC	protein_coding	15	2.1273	1.3872	3.1016	3.0063	0.019983	0.99993	-4.5313
interferon gamma [Source:HGNC Symbol;Acc:HGNC:5438]	ENSG00000111537	3458	HGNC Symbol	IFNG	protein_coding	1	9.9713	1.332	6.0857	2.8785	0.02394	0.99993	-4.5345
TNF receptor superfamily member 4 [Source:HGNC Symbol;Acc:HGNC:11918]	ENSG00000186827	7293	HGNC Symbol	TNFRSF4	protein_coding	3	1.4003	1.293	0.020278	2.5764	0.036953	0.99993	-4.5426
mindbomb E3 ubiquitin protein ligase 2 [Source:HGNC Symbol;Acc:HGNC:30577]	ENSG00000197530	142678	HGNC Symbol	MIB2	protein_coding	32	2.289	1.2883	2.7437	2.8538	0.024797	0.99993	-4.5351
EGF containing fibulin extracellular matrix protein 2 [Source:HGNC Symbol;Acc:HGNC:3219]	ENSG00000172638	30008	HGNC Symbol	EFEMP2	protein_coding	20	1.5034	1.2817	2.0593	2.4849	0.042214	0.99993	-4.5452
meteorin like, glial cell differentiation regulator [Source:HGNC Symbol;Acc:HGNC:27584]	ENSG00000176845	284207	HGNC Symbol	METRNL	protein_coding	5	2.3252	1.2668	1.7472	2.9577	0.021399	0.99993	-4.5325
granzyme H [Source:HGNC Symbol;Acc:HGNC:4710]	ENSG00000100450	2999	HGNC Symbol	GZMH	protein_coding	3	9.473	1.2268	8.5415	2.7314	0.029542	0.99993	-4.5383
C-C motif chemokine ligand 5 [Source:HGNC Symbol;Acc:HGNC:10632]	ENSG00000271503	6352	HGNC Symbol	CCL5	protein_coding	4	11.807	1.186	12.231	3.2432	0.014372	0.99993	-4.5259
family with sequence similarity 107 member B [Source:HGNC Symbol;Acc:HGNC:23726]	ENSG00000065809	83641	HGNC Symbol	FAM107B	protein_coding	29	7.6302	1.1801	7.4456	2.8631	0.024469	0.99993	-4.5349
chromobox 4 [Source:HGNC Symbol;Acc:HGNC:1554]	ENSG00000141582	8535	HGNC Symbol	CBX4	protein_coding	4	1.6101	1.1326	2.0069	2.5228	0.03995	0.99993	-4.5441
FES proto-oncogene, tyrosine kinase [Source:HGNC Symbol;Acc:HGNC:3657]	ENSG00000182511	2242	HGNC Symbol	FES	protein_coding	17	4.1867	1.1219	3.4436	2.9275	0.022332	0.99993	-4.5333
S-phase cancer associated transcript 1 [Source:HGNC Symbol;Acc:HGNC:52930]	ENSG00000267123	NA	HGNC Symbol	SCAT1	lincRNA	24	1.7291	1.1023	2.624	2.758	0.028435	0.99993	-4.5376
long intergenic non-protein coding RNA 2481 [Source:HGNC Symbol;Acc:HGNC:27958]	ENSG00000246526	NA	HGNC Symbol	LINC002481	lincRNA	1	4.3503	1.0903	5.7659	2.658	0.032838	0.99993	-4.5403
dipeptidase 2 [Source:HGNC Symbol;Acc:HGNC:23028]	ENSG00000167261	64174	HGNC Symbol	DPEP2	protein_coding	9	4.4238	1.0796	5.8747	2.5228	0.039946	0.99993	-4.5441
cytochrome b561 [Source:HGNC Symbol;Acc:HGNC:2571]	ENSG00000008283	1534	HGNC Symbol	CYB561	protein_coding	21	2.2276	1.0661	2.5786	2.5203	0.040095	0.99993	-4.5442
ring finger protein 126 [Source:NCBI gene;Acc:55658]	ENSG00000070423	55658	NCBI gene	RNF126	protein_coding	7	1.4392	1.0628	1.3687	2.9788	0.020771	0.99993	-4.532
serpin family B member 1 [Source:HGNC Symbol;Acc:HGNC:3311]	ENSG00000021355	1992	HGNC Symbol	SERPINB1	protein_coding	5	8.2097	1.0349	8.2286	2.4652	0.043447	0.99993	-4.5458
NCK interacting protein with SH3 domain [Source:HGNC Symbol;Acc:HGNC:15486]	ENSG00000213672	51517	HGNC Symbol	NCKIPSD	protein_coding	9	1.5705	0.97666	1.8547	2.6129	0.03505	0.99993	-4.5416
cysteine and serine rich nuclear protein 1 [Source:HGNC Symbol;Acc:HGNC:14300]	ENSG00000144655	64651	HGNC Symbol	CSRNP1	protein_coding	2	2.5583	0.93843	2.0519	2.4111	0.047018	0.99993	-4.5474
zinc finger protein 775 [Source:HGNC Symbol;Acc:HGNC:28501]	ENSG00000196456	285971	HGNC Symbol	ZNF775	protein_coding	2	2.5476	0.9134	2.7719	2.5503	0.038383	0.99993	-4.5433
synaptophysin like 1 [Source:HGNC Symbol;Acc:HGNC:11507]	ENSG00000008282	6856	HGNC Symbol	SYPL1	protein_coding	7	5.8739	-1.0498	6.5834	-2.5994	0.035744	0.99993	-4.5419
monocyte to macrophage differentiation associated [Source:HGNC Symbol;Acc:HGNC:7153]	ENSG00000108960	23531	HGNC Symbol	MMD	protein_coding	4	3.9588	-1.0698	3.8707	-2.4692	0.043194	0.99993	-4.5457
baculoviral IAP repeat containing 3 [Source:HGNC Symbol;Acc:HGNC:591]	ENSG00000023445	330	HGNC Symbol	BIRC3	protein_coding	7	7.3395	-1.1494	7.3713	-2.5051	0.040991	0.99993	-4.5446
phorbol-12-myristate-13-acetate-induced protein 1 [Source:HGNC Symbol;Acc:HGNC:9108]	ENSG00000141682	5366	HGNC Symbol	PMAIP1	protein_coding	3	5.9395	-1.1784	4.6614	-3.0066	0.019974	0.99993	-4.5313
BCL2 like 1 [Source:HGNC Symbol;Acc:HGNC:992]	ENSG00000171552	598	HGNC Symbol	BCL2L1	protein_coding	9	5.1527	-1.3335	4.7524	-2.727	0.02973	0.99993	-4.5384
myelin protein zero like 2 [Source:HGNC Symbol;Acc:HGNC:3496]	ENSG00000149573	10205	HGNC Symbol	MPZL2	protein_coding	7	2.7277	-1.3739	4.4899	-3.9476	0.0056521	0.99993	-4.5127
cytokine inducible SH2 containing protein [Source:HGNC Symbol;Acc:HGNC:1984]	ENSG00000114737	1154	HGNC Symbol	CISH	protein_coding	3	3.5375	-1.4062	3.2351	-3.0163	0.019703	0.99993	-4.5311
ChaC glutathione specific gamma-glutamylcyclotransferase 1 [Source:HGNC Symbol;Acc:HGNC:28680]	ENSG00000128965	79094	HGNC Symbol	CHAC1	protein_coding	3	1.4578	-1.5734	1.0805	-2.3984	0.047899	0.99993	-4.5478
capping actin protein, gelsolin like [Source:HGNC Symbol;Acc:HGNC:1474]	ENSG00000042493	822	HGNC Symbol	CAPG	protein_coding	15	4.492	-1.6957	6.6252	-2.7243	0.029844	0.99993	-4.5385
transcription elongation factor A like 9 [Source:HGNC Symbol;Acc:HGNC:30084]	ENSG00000185222	51186	HGNC Symbol	TCEAL9	protein_coding	3	1.5381	-2.7218	2.1303	-3.0058	0.019996	0.99993	-4.5313
natural cytotoxicity triggering receptor 2 [Source:HGNC Symbol;Acc:HGNC:6732]	ENSG00000096264	9436	HGNC Symbol	NCR2	protein_coding	3	1.9596	-2.9166	3.8752	-4.7703	0.002087	0.99993	-4.5018

## Sheet: D6 LD vs HCW9207
Description	Ensemble Gene ID	Entrezgene	External Gene Source	Gene Name	Gene Biotype	Transcript Count	Mean	logFC	Average Expression	t	P. Value	Adj. P. Value	B
lymphocyte activating 3 [Source:HGNC Symbol;Acc:HGNC:6476]	ENSG00000089692	3902	HGNC Symbol	LAG3	protein_coding	4	2.4534	2.5738	1.5663	2.4396	0.04642	0.99926	-4.5442
purinergic receptor P2X 5 [Source:HGNC Symbol;Acc:HGNC:8536]	ENSG00000083454	5026	HGNC Symbol	P2RX5	protein_coding	11	5.1639	2.3595	4.041	3.1446	0.017306	0.99926	-4.5252
C-C motif chemokine receptor 5 (gene/pseudogene) [Source:HGNC Symbol;Acc:HGNC:1606]	ENSG00000160791	1234	HGNC Symbol	CCR5	protein_coding	2	4.0939	2.3124	3.9985	3.5629	0.0099307	0.99926	-4.5163
C-X-C motif chemokine ligand 10 [Source:HGNC Symbol;Acc:HGNC:10637]	ENSG00000169245	3627	HGNC Symbol	CXCL10	protein_coding	1	4.6304	2.0853	3.6428	2.9304	0.023214	0.99926	-4.5304
granzyme K [Source:HGNC Symbol;Acc:HGNC:4711]	ENSG00000113088	3003	HGNC Symbol	GZMK	protein_coding	2	6.1815	2.0725	8.0887	3.0563	0.019521	0.99926	-4.5273
interleukin 1 receptor like 1 [Source:HGNC Symbol;Acc:HGNC:5998]	ENSG00000115602	9173	HGNC Symbol	IL1RL1	protein_coding	9	2.9259	2.0711	2.8131	2.6349	0.035132	0.99926	-4.5384
selectin L [Source:HGNC Symbol;Acc:HGNC:10720]	ENSG00000188404	6402	HGNC Symbol	SELL	protein_coding	7	8.8052	1.9932	9.5338	3.7688	0.0076266	0.99926	-4.5125
C-X-C motif chemokine receptor 6 [Source:HGNC Symbol;Acc:HGNC:16647]	ENSG00000172215	10663	HGNC Symbol	CXCR6	protein_coding	4	5.8075	1.8812	7.3143	5.5575	0.0010016	0.99926	-4.4908
phosphodiesterase 4B [Source:HGNC Symbol;Acc:HGNC:8781]	ENSG00000184588	5142	HGNC Symbol	PDE4B	protein_coding	18	5.8588	1.6823	5.7488	3.5245	0.010439	0.99926	-4.517
interferon gamma [Source:HGNC Symbol;Acc:HGNC:5438]	ENSG00000111537	3458	HGNC Symbol	IFNG	protein_coding	1	9.9713	1.4992	6.1693	3.4469	0.011554	0.99926	-4.5186
ring finger protein 157 [Source:HGNC Symbol;Acc:HGNC:29402]	ENSG00000141576	114804	HGNC Symbol	RNF157	protein_coding	10	5.2231	1.4763	5.495	2.6007	0.036879	0.99926	-4.5394
interleukin 18 receptor accessory protein [Source:HGNC Symbol;Acc:HGNC:5989]	ENSG00000115607	8807	HGNC Symbol	IL18RAP	protein_coding	4	9.1063	1.4209	8.9903	3.3825	0.012579	0.99926	-4.5199
FES proto-oncogene, tyrosine kinase [Source:HGNC Symbol;Acc:HGNC:3657]	ENSG00000182511	2242	HGNC Symbol	FES	protein_coding	17	4.1867	1.3305	3.5479	3.2675	0.014663	0.99926	-4.5224
family with sequence similarity 107 member B [Source:HGNC Symbol;Acc:HGNC:23726]	ENSG00000065809	83641	HGNC Symbol	FAM107B	protein_coding	29	7.6302	1.2872	7.4992	3.1173	0.01796	0.99926	-4.5258
family with sequence similarity 118 member A [Source:HGNC Symbol;Acc:HGNC:1313]	ENSG00000100376	55007	HGNC Symbol	FAM118A	protein_coding	16	4.3778	1.2686	4.1747	2.9609	0.022257	0.99926	-4.5296
interleukin 18 receptor 1 [Source:HGNC Symbol;Acc:HGNC:5988]	ENSG00000115604	8809	HGNC Symbol	IL18R1	protein_coding	5	6.2049	1.2107	5.9225	3.1066	0.018224	0.99926	-4.5261
mitogen-activated protein kinase kinase kinase 8 [Source:HGNC Symbol;Acc:HGNC:6860]	ENSG00000107968	1326	HGNC Symbol	MAP3K8	protein_coding	7	7.0619	1.1797	6.4455	2.6051	0.036653	0.99926	-4.5393
PBX homeobox interacting protein 1 [Source:HGNC Symbol;Acc:HGNC:21199]	ENSG00000163346	57326	HGNC Symbol	PBXIP1	protein_coding	6	3.3043	1.1645	4.2558	2.8844	0.024747	0.99926	-4.5316
fatty acyl-CoA reductase 2 [Source:HGNC Symbol;Acc:HGNC:25531]	ENSG00000064763	55711	HGNC Symbol	FAR2	protein_coding	10	4.0615	1.1101	4.511	2.8327	0.026596	0.99926	-4.5329
prolyl 4-hydroxylase, transmembrane [Source:HGNC Symbol;Acc:HGNC:28858]	ENSG00000178467	54681	HGNC Symbol	P4HTM	protein_coding	12	2.5955	1.1086	3.2032	2.615	0.036142	0.99926	-4.539
long intergenic non-protein coding RNA 2481 [Source:HGNC Symbol;Acc:HGNC:27958]	ENSG00000246526	NA	HGNC Symbol	LINC002481	lincRNA	1	4.3503	1.0597	5.7506	2.3912	0.04976	0.99926	-4.5457
calponin 2 [Source:HGNC Symbol;Acc:HGNC:2156]	ENSG00000064666	1265	HGNC Symbol	CNN2	protein_coding	12	6.188	1.056	6.5879	2.7989	0.027884	0.99926	-4.5338
diacylglycerol kinase alpha [Source:HGNC Symbol;Acc:HGNC:2849]	ENSG00000065357	1606	HGNC Symbol	DGKA	protein_coding	49	5.8191	1.0002	6.2232	2.8523	0.025876	0.99926	-4.5324
C-C motif chemokine ligand 5 [Source:HGNC Symbol;Acc:HGNC:10632]	ENSG00000271503	6352	HGNC Symbol	CCL5	protein_coding	4	11.807	0.98867	12.132	2.7743	0.028863	0.99926	-4.5345
von Willebrand factor A domain containing 5A [Source:HGNC Symbol;Acc:HGNC:6658]	ENSG00000110002	4013	HGNC Symbol	VWA5A	protein_coding	6	4.8862	0.98673	5.3099	2.4897	0.043207	0.99926	-4.5427
dipeptidyl peptidase 4 [Source:HGNC Symbol;Acc:HGNC:3009]	ENSG00000197635	1803	HGNC Symbol	DPP4	protein_coding	11	5.263	0.97913	5.7652	2.7863	0.028381	0.99926	-4.5342
SH3 domain binding protein 1 [Source:HGNC Symbol;Acc:HGNC:10824]	ENSG00000100092	23616	HGNC Symbol	SH3BP1	protein_coding	11	2.4987	0.95323	2.7844	2.5049	0.042276	0.99926	-4.5422
phosphogluconate dehydrogenase [Source:HGNC Symbol;Acc:HGNC:8891]	ENSG00000142657	5226	HGNC Symbol	PGD	protein_coding	10	8.0176	0.9359	7.7037	2.4243	0.047451	0.99926	-4.5447
zinc finger protein 497 [Source:HGNC Symbol;Acc:HGNC:23714]	ENSG00000174586	162968	HGNC Symbol	ZNF497	protein_coding	3	1.9121	0.8743	2.5386	2.55	0.039642	0.99926	-4.5409
solute carrier family 9 member A9 [Source:HGNC Symbol;Acc:HGNC:20653]	ENSG00000181804	285195	HGNC Symbol	SLC9A9	protein_coding	5	4.3893	0.85853	4.4961	2.536	0.040437	0.99926	-4.5413
high mobility group nucleosome binding domain 5 [Source:HGNC Symbol;Acc:HGNC:8013]	ENSG00000198157	79366	HGNC Symbol	HMGN5	protein_coding	7	2.8937	-0.97017	3.6442	-2.5466	0.039833	0.99926	-4.541
tumor suppressing subtransferable candidate 4 [Source:HGNC Symbol;Acc:HGNC:12386]	ENSG00000184281	10078	HGNC Symbol	TSSC4	protein_coding	10	2.8761	-1.0075	2.9032	-2.5298	0.040799	0.99926	-4.5415
exostosin like glycosyltransferase 2 [Source:HGNC Symbol;Acc:HGNC:3516]	ENSG00000162694	2135	HGNC Symbol	EXTL2	protein_coding	7	3.3264	-1.0809	3.8939	-2.6773	0.033088	0.99926	-4.5372
guanylate cyclase 1 soluble subunit alpha 1 [Source:HGNC Symbol;Acc:HGNC:4685]	ENSG00000164116	2982	HGNC Symbol	GUCY1A1	protein_coding	13	3.5252	-1.1578	3.4859	-2.9554	0.022427	0.99926	-4.5298
transcription elongation factor A like 9 [Source:HGNC Symbol;Acc:HGNC:30084]	ENSG00000185222	51186	HGNC Symbol	TCEAL9	protein_coding	3	1.5381	-1.4072	2.7876	-2.5988	0.036982	0.99926	-4.5394
capping actin protein, gelsolin like [Source:HGNC Symbol;Acc:HGNC:1474]	ENSG00000042493	822	HGNC Symbol	CAPG	protein_coding	15	4.492	-1.5298	6.7082	-2.6956	0.032241	0.99926	-4.5367
cytokine inducible SH2 containing protein [Source:HGNC Symbol;Acc:HGNC:1984]	ENSG00000114737	1154	HGNC Symbol	CISH	protein_coding	3	3.5375	-1.6163	3.1301	-3.0065	0.020901	0.99926	-4.5285
myelin protein zero like 2 [Source:HGNC Symbol;Acc:HGNC:3496]	ENSG00000149573	10205	HGNC Symbol	MPZL2	protein_coding	7	2.7277	-1.7399	4.3069	-4.5762	0.002882	0.99926	-4.5006
natural cytotoxicity triggering receptor 2 [Source:HGNC Symbol;Acc:HGNC:6732]	ENSG00000096264	9436	HGNC Symbol	NCR2	protein_coding	3	1.9596	-2.3795	4.1438	-3.0452	0.019818	0.99926	-4.5275
